# Supplementary material for: Towards the Systematic Mapping and Engineering of the Protein Prenylation Machinery in Saccharomyces cerevisiae
Source: PubMed Central journal article supplement (PMC4358939; doi:10.1371/journal.pone.0120716), 2015-03-13
Supplement: pone.0120716.s001.pdf [file pone.0120716.s001.pdf]

**Table S1:** Summary of oligonucleotides used to create different constructs in this study.

| Name  | Primer Sequence                                         | Notes                                        |
|-------|---------------------------------------------------------|----------------------------------------------|
| VS112 | 5'-GGAAGGAAAAGCTTCCCGGGAC-3'                            | Forward Ras61, HindIII                       |
| VS113 | 5'-CAGCTCAUGCAGCCGGG-3'                                 | Reverse Ras61, For Uracil-Excision-Extension |
| VS114 | 5'-GGAAGAAGGATCCTTACTAAGACAGAACACATTTACAGCTCAT-3'       | -KCVLS Extension, BamHI                      |
| VS115 | 5'-GGAAGAAGGATCCTTACTACATAATAGAACATTTACAGCTCAT-3'       | -KCSIM Extension, BamHI                      |
| VS116 | 5'-GGAAGAAGGATCCTTACTACAACAAAACACATTTACAGCTCAT-3'       | -KCVLL Extension, BamHI                      |
| VS117 | 5'-GGAAGAAGGATCCTTACTASNNNSNNNACATTTACAGCTCAT-3'        | -KCXXX Extension, 8000-mer Library, BamHI    |
| VS177 | 5'-GGAAGAAGGATCCTTACTAAAGAATAGCACATTTACAGCTCAT-3'       | -KCAIL Extension, BamHI                      |
| VS178 | 5'-GGAAGAAGGATCCTTACTAAGAAATAATACAACAACAGCTCAT-3'       | -CCIIS Extension, BamHI                      |
| VS179 | 5'-GGAAGAAGGATCCTTACTAAGCAATAACACAAGCACAGCTCAT-3'       | -ACVIA Extension, BamHI                      |
| VS180 | 5'-GGAAGAAGGATCCTTACTAAGCAGAAGCTCTAGAAGCACAGCTCAT-3'    | -ASRASA Extension, BamHI                     |
| VS181 | 5'-GGAAGAAGGATCCTTACTATAGAATAGTACAAGTACAGCTCAT-3'       | -TCTIL Extension, BamHI                      |
| VS184 | 5'-GAGAATCTGTACTTCCAGGGCGCTTCTTCGAGTTCCTTACCTATTATTG-3' | 5'-β-FTase                                   |
| VS185 | 5'-AACAGTGAATTCCTTACTAAAGCTTGTCTAGTGGCAGGATC-3'         | 3'-β-FTase                                   |
| VS187 | 5'-GCCCTGGAAGTACAGATTCTCTACTCGCCGGTATGTCACCTTCTC-3'     | 3'-α-FTase                                   |
| VS192 | 5'-AACAGTGGTACCAACACAATGTCTCCAGCACAGCAGCCGAGGAA-3'      | 5'-α-FTase + Optimal Translation Initiation  |
| VS212 | 5'-GGAAGAAGGATCCTTACTATCTAATAATACAAGCACAGCTCAT-3'       | -ACIIR Extension, BamHI                      |
| VS213 | 5'-GGAAGAAGGATCCTTACTATTTAATAATACAAGCACAGCTCAT-3'       | -ACIIK Extension, BamHI                      |
| VS214 | 5'-GGAAGAAGGATCCTTACTAATCAATAATACAAGCACAGCTCAT-3'       | -ACIID Extension, BamHI                      |
| VS215 | 5'-GGAAGAAGGATCCTTACTATTTAATAATACAAGCACAGCTCAT-3'       | -ACIIE Extension, BamHI                      |
| VS296 | 5'-TTACUAGTGGATCAACCCAAAATCACTA-3'                      | Reverse Primer, Ion Torrent, Amplicon        |
| VS340 | 5'-GAGUGGCCCGGCTGCATG-3'                                | Forward Primer, Ion Torrent, Amplicon        |
| VS341 | 5'-CCATCTCATCCCTGCGTGTCTCCGACTCAGGAGT-3'                | 5'-Flanking Region, Ion Torrent DNA Cassette |
| VS342 | 5'-PO <sub>3</sub> -CTGAGTCGGAGACACGCAGGGATGAGATGG-3'   | 5'-Flanking Region, Ion Torrent DNA Cassette |
| VS343 | 5'-PO <sub>3</sub> -ATCACCGACTGCCATAGAGAGG-3'           | 3'-Flanking Region, Ion Torrent DNA Cassette |
| VS344 | 5'-CCTCTCTATGGCAGTGGTGATTACT-3'                         | 3'-Flanking Region, Ion Torrent DNA Cassette |
| VS200 | 5'-ACGCTCTGCTACTGGATCCTGC-3'                            | 5'-Fragment #1 αβ-FTase, BamHI               |
| VS201 | 5'-TCCAAAUCCACCGTCTGGACTCTGACAC-3'                      | 3'-Fragment #1 αβ-FTase, USER                |
| VS204 | 5'-P-GATGGCCCTGGTCAGTACCCACACCTCGCTCCACGTATGCAGCT-3'    | Synthetic DNA, Fragment #2, Forward β-G142D  |
| VS205 | 5'-P-GAAGGCCCTGGTCAGTACCCACACCTCGCTCCACGTATGCAGCT-3'    | Synthetic DNA, Fragment #2, Forward β-G142E  |
| VS208 | 5'-P-ATACGTGGGAGCGAGGTGTGGTACTGACCAGGGCCATCTCCAAAT-3'   | Synthetic DNA, Fragment #2, Reverse β-G142D  |
| VS209 | 5'-P-ATACGTGGGAGCGAGGTGTGGTACTGACCAGGGCCTTCTCCAAAT-3'   | Synthetic DNA, Fragment #2, Reverse β-G142E  |
| VS210 | 5'-GCAGCUGTCAACGCGCTATG-3'                              | 5'-Fragment #3 αβ-FTase, USER                |
| VS211 | 5'-GGTAGAAGTCACGTGACTTGCCAG-3'                          | 3'-Fragment #4 αβ-FTase, PmlI                |

# 1. Assembly of CAAX-Box Reporter Proteins Exemplified for the 8000-mer CAAX-Box Library

## (1) PCR Amplify Ras61

5'-GGAAGGAA**AAGCTT**CCCGGGAC-3' (VS112)  
5'-GGAAGGAA**AAGCTT**CCCGGGAC.....ATGAGAGTGGCCCCGGCTGCATGAGCTG-3'  
3'-CCTTCCTT**TTCGAA**GGGCCCTG.....TACTCTCACCGGGGCCGACG**U**ACTCGAC-5'  
3'-GGGCCGACG**U**ACTCGAC-5' (VS113)

## (2) Create 3' Single Stranded Extensions by Treating PCR Product with USER Enzyme

5'-GGAAGGAA**AAGCTT**CCCGGGAC.....ATGAGAGTGGCCCCGGCTGCATGAGCTG-3'  
3'-CCTTCCTT**TTCGAA**GGGCCCTG.....TACTCTCACCGGGGCCGACG-P-5'

## (3) Attach CAAX-Box Library Coding Oligonucleotide to the Recessed 5' End with T4 DNA Ligase

5'-GGAAGGAA**AAGCTT**CCCGGGAC.....ATGAGAGTGGCCCCGGCTGCATGAGCTG-3'  
3'-CCTTCCTT**TTCGAA**GGGCCCTG.....TACTCTCACCGGGGCCGACGTACTCGACATTT**ACANNSNNSNNS**ATCATT**CCTAGG**AAGAAGG-5'

3'-TACTCGACATTT**ACANNSNNSNNS**ATCATT**CCTAGG**AAGAAGG-5' (VS117)

## (3) Fill in 3' End with Pfu C<sub>x</sub> Polymerase

HindIII

BamHI

E S G P G C M S C K C X X X \* \*  
5'-GGAAGGAA**AAGCTT**CCCGGGAC.....ATGAGAGTGGCCCCGGCTGCATGAGCTGTAAT**TGTNNSNNSNNS**TAGTAA**GGATCC**TTCTTCC-3'  
3'-CCTTCCTT**TTCGAA**GGGCCCTG.....TACTCTCACCGGGGCCGACGTACTCGACATTT**ACANNSNNSNNS**ATCATT**CCTAGG**AAGAAGG-5'



### 3. Assembly of Ion Torrent Sequencing Libraries

#### (1) PCR Amplify CAAX-Box Library from DNA Plasmid Preparations Following Selections

5' - GAGUGGCCCGGCTGCATG-3' (VS340)

5' - GAGUGGCCCGGCTGCATGAGCTGTAAATGTNNNNNNNNNTGATAGTGATTTTGGGTTGATCCACTAGTAA-3'

3' - CTCACCGGGCCGACGTACTCGACATTTACANNNNNNNNNACTATCACTAAAACCCAACCTAGGTGAUCATT-5'

3' - ATCACTAAAACCCAACCTAGGTGAUCATT-5' (VS296)

#### (2) Create 3' Single Stranded Extensions by Treating PCR Product with USER Enzyme

5' - P-GGCCCGGCTGCATGAGCTGTAAATGTNNNNNNNNNTGATAGTGATTTTGGGTTGATCCACTAGTAA-3'

3' - CTCACCGGGCCGACGTACTCGACATTTACANNNNNNNNNACTATCACTAAAACCCAACCTAGGTGA-P-5'

#### (3) Introduce Flanking Regions for Ion Torrent Sequencing via Synthetic DNA Cassettes

5' - CCATCTCATCCCTGCGTGTCTCCGACTCAGGAGT-3' (VS341)

3' - GGTAGAGTAGGGACGCACAGAGGCTGAGTC-P-5' (VS342)

5' - GGCCCGGCTGCATGAGCTGTAAATGTNNNNNNNNNTGATAGTGATTTTGGGTTGATCCACTAGTAA-3'

3' - CTCACCGGGCCGACGTACTCGACATTTACANNNNNNNNNACTATCACTAAAACCCAACCTAGGTGA-5'

5' - P-ATCACCGACTGCCCATAGAGAGG-3' (VS343)

3' - TCATTTAGTGGCTGACGGGTATCTCTCC-5' (VS344)

#### (4) Fully Assembled DNA Product (124 bp)

Ion Torrent Sequencing Primer

5' - CCATCTCATCCCTGCGTGTCTCCGACTCAG-3'

5' - CCATCTCATCCCTGCGTGTCTCCGACTCAGGAGTGGCCCGGCTGCATGAGCTGTAAATGTNNNNNNNNNTGATAGTGATTTTGGGTTGATCCACTAGTAAATCACCGACTGCCCATAGAGAGG-3'

3' - GGTAGAGTAGGGACGCACAGAGGCTGAGTCTCACCGGGCCGACGTACTCGACATTTACANNNNNNNNNACTATCACTAAAACCCAACCTAGGTGATCATTAGTGGCTGACGGGTATCTCTCC-5'

3' - TAGTGGCTGACGGGTATCTCTCC-5'

Ion Torrent Bead Immobilization Primer
