# Supplementary material for: Towards the Systematic Mapping and Engineering of the Protein Prenylation Machinery in Saccharomyces cerevisiae
Source: PubMed Central journal article supplement (PMC4358939; doi:10.1371/journal.pone.0120716), 2015-03-13
Supplement: pone.0120716.s002.pdf [file pone.0120716.s002.pdf]

| Motif  | Enrichment | Counts |       |       |
|--------|------------|--------|-------|-------|
|        |            | 37 °C  | 25 °C | Naive |
| -CLRS  | 0.0075329  | 1      | 53    | 134   |
| -CVGS  | 0.0084946  | 1      | 47    | 45    |
| -CTSG  | 0.010237   | 1      | 39    | 54    |
| -CLPS  | 0.010506   | 1      | 38    | 79    |
| -CAKS  | 0.01079    | 1      | 37    | 33    |
| -CIPL  | 0.011743   | 1      | 34    | 36    |
| -CTNV  | 0.012098   | 1      | 33    | 41    |
| -CNTS  | 0.012476   | 1      | 32    | 56    |
| -CPTL  | 0.012476   | 1      | 32    | 55    |
| -CPTS  | 0.012476   | 1      | 32    | 66    |
| -CDTS  | 0.012879   | 1      | 31    | 39    |
| -CLTE  | 0.012879   | 1      | 31    | 46    |
| -CPRL  | 0.012879   | 1      | 31    | 59    |
| -CRES  | 0.012879   | 1      | 31    | 26    |
| -CSKL  | 0.012879   | 1      | 31    | 54    |
| -CRTG  | 0.013308   | 1      | 30    | 62    |
| -CSLG  | 0.013308   | 1      | 30    | 66    |
| -CEVR  | 0.014259   | 1      | 28    | 41    |
| -CKSS  | 0.014518   | 2      | 55    | 56    |
| -CFSV  | 0.014787   | 1      | 27    | 35    |
| -CLDI  | 0.014787   | 1      | 27    | 19    |
| -CLKT  | 0.014787   | 1      | 27    | 35    |
| -CLNR  | 0.014787   | 1      | 27    | 76    |
| -CLST  | 0.014787   | 2      | 54    | 65    |
| -CLTT  | 0.014787   | 1      | 27    | 86    |
| -CSDP  | 0.014787   | 1      | 27    | 39    |
| -CERR  | 0.015356   | 1      | 26    | 52    |
| -CSGI  | 0.015356   | 1      | 26    | 29    |
| -CSTI  | 0.015356   | 1      | 26    | 46    |
| -CVRE  | 0.015356   | 1      | 26    | 26    |
| -CYAL  | 0.015356   | 1      | 26    | 56    |
| -CDSK  | 0.01597    | 1      | 25    | 29    |
| -CRSK  | 0.01597    | 1      | 25    | 32    |
| -CVPR  | 0.01597    | 1      | 25    | 37    |
| -CFKS  | 0.016635   | 1      | 24    | 24    |
| -CGSF  | 0.016635   | 1      | 24    | 19    |
| -CKLP  | 0.016635   | 1      | 24    | 43    |
| -CKSV  | 0.016635   | 1      | 24    | 39    |
| -CLGT  | 0.016635   | 1      | 24    | 38    |
| -CLSL  | 0.01687    | 3      | 71    | 118   |
| -CP EL | 0.016989   | 2      | 47    | 39    |
| -CERK  | 0.017359   | 1      | 23    | 19    |
| -CLGK  | 0.017359   | 1      | 23    | 33    |
| -CLTN  | 0.017359   | 1      | 23    | 50    |
| -CNTR  | 0.017359   | 1      | 23    | 39    |
| -CQSP  | 0.017359   | 1      | 23    | 34    |
| -CTGS  | 0.017359   | 1      | 23    | 69    |
| -CVDR  | 0.017359   | 1      | 23    | 31    |
| -CYED  | 0.017359   | 1      | 23    | 16    |
| -CGLV  | 0.017744   | 2      | 45    | 56    |
| -CARL  | 0.018148   | 1      | 22    | 62    |
| -CASR  | 0.018148   | 1      | 22    | 64    |
| -CGSK  | 0.018148   | 1      | 22    | 40    |

|       |          |   |    |    |
|-------|----------|---|----|----|
| -CIGI | 0.018148 | 1 | 22 | 22 |
| -CNGV | 0.018148 | 1 | 22 | 38 |
| -CPGL | 0.018148 | 1 | 22 | 57 |
| -CSPV | 0.018148 | 1 | 22 | 47 |
| -CSQV | 0.018148 | 1 | 22 | 48 |
| -CSTN | 0.018148 | 1 | 22 | 48 |
| -CTLP | 0.018148 | 1 | 22 | 48 |
| -CTPV | 0.018148 | 1 | 22 | 48 |
| -CVNR | 0.018148 | 1 | 22 | 49 |
| -CYHS | 0.018148 | 1 | 22 | 37 |
| -CLFT | 0.019012 | 1 | 21 | 38 |
| -CSPN | 0.019012 | 1 | 21 | 47 |
| -CSRD | 0.019012 | 1 | 21 | 34 |
| -CTKS | 0.019012 | 1 | 21 | 21 |
| -CTSC | 0.019012 | 1 | 21 | 27 |
| -CVAI | 0.019012 | 1 | 21 | 34 |
| -CLSE | 0.019475 | 2 | 41 | 50 |
| -CTAR | 0.019475 | 2 | 41 | 74 |
| -CAKT | 0.019962 | 1 | 20 | 34 |
| -CDDV | 0.019962 | 1 | 20 | 29 |
| -CLNT | 0.019962 | 2 | 40 | 55 |
| -CMGL | 0.019962 | 1 | 20 | 37 |
| -CPER | 0.019962 | 1 | 20 | 33 |
| -CSIE | 0.019962 | 1 | 20 | 33 |
| -CTKL | 0.019962 | 1 | 20 | 48 |
| -CVDG | 0.019962 | 1 | 20 | 24 |
| -CVTP | 0.019962 | 1 | 20 | 35 |
| -CYTT | 0.019962 | 1 | 20 | 38 |
| -CSRG | 0.020474 | 2 | 39 | 62 |
| -CADS | 0.021013 | 1 | 19 | 27 |
| -CCTE | 0.021013 | 1 | 19 | 29 |
| -CDFP | 0.021013 | 1 | 19 | 20 |
| -CDGT | 0.021013 | 1 | 19 | 29 |
| -CEAL | 0.021013 | 1 | 19 | 47 |
| -CFPL | 0.021013 | 1 | 19 | 52 |
| -CGQS | 0.021013 | 1 | 19 | 32 |
| -CGRT | 0.021013 | 1 | 19 | 57 |
| -CLDK | 0.021013 | 1 | 19 | 23 |
| -CLDY | 0.021013 | 1 | 19 | 38 |
| -CLRN | 0.021013 | 1 | 19 | 41 |
| -CLTP | 0.021013 | 1 | 19 | 53 |
| -CNSS | 0.021013 | 2 | 38 | 41 |
| -CPVP | 0.021013 | 1 | 19 | 56 |
| -CRTL | 0.021013 | 2 | 38 | 83 |
| -CVPI | 0.021013 | 1 | 19 | 13 |
| -CWST | 0.021013 | 1 | 19 | 38 |
| -CERS | 0.021581 | 2 | 37 | 55 |
| -CSNR | 0.021581 | 2 | 37 | 58 |
| -CVLG | 0.021581 | 2 | 37 | 57 |
| -CVST | 0.021581 | 2 | 37 | 69 |
| -CESM | 0.02218  | 1 | 18 | 31 |
| -CEVD | 0.02218  | 1 | 18 | 6  |
| -CFEA | 0.02218  | 1 | 18 | 11 |
| -CFTN | 0.02218  | 1 | 18 | 7  |
| -CGNV | 0.02218  | 1 | 18 | 21 |
| -CGYV | 0.02218  | 1 | 18 | 22 |
| -CIEL | 0.02218  | 1 | 18 | 18 |

|       |          |    |     |     |
|-------|----------|----|-----|-----|
| -CKSG | 0.02218  | 1  | 18  | 27  |
| -CKYV | 0.02218  | 1  | 18  | 27  |
| -CLGP | 0.02218  | 1  | 18  | 27  |
| -CLGV | 0.02218  | 1  | 18  | 50  |
| -CLPG | 0.02218  | 1  | 18  | 19  |
| -CNSN | 0.02218  | 1  | 18  | 31  |
| -CPLL | 0.02218  | 2  | 36  | 83  |
| -CPLR | 0.02218  | 1  | 18  | 77  |
| -CPTG | 0.02218  | 1  | 18  | 34  |
| -CQSA | 0.02218  | 1  | 18  | 25  |
| -CSDT | 0.02218  | 1  | 18  | 24  |
| -CSNE | 0.02218  | 1  | 18  | 15  |
| -CSTE | 0.02218  | 1  | 18  | 23  |
| -CSTK | 0.02218  | 1  | 18  | 35  |
| -CSTT | 0.02218  | 2  | 36  | 81  |
| -CSYR | 0.02218  | 1  | 18  | 64  |
| -CTPT | 0.02218  | 1  | 18  | 34  |
| -CTSW | 0.02218  | 1  | 18  | 47  |
| -CVSI | 0.02218  | 1  | 18  | 41  |
| -CYST | 0.02218  | 1  | 18  | 45  |
| -CETL | 0.022814 | 2  | 35  | 38  |
| -CLTR | 0.022814 | 2  | 35  | 115 |
| -CMSV | 0.022814 | 2  | 35  | 40  |
| -CSVD | 0.023061 | 16 | 277 | 162 |
| -CDDM | 0.023485 | 1  | 17  | 16  |
| -CDKL | 0.023485 | 1  | 17  | 36  |
| -CEEV | 0.023485 | 1  | 17  | 14  |
| -CFSA | 0.023485 | 1  | 17  | 16  |
| -CGPR | 0.023485 | 1  | 17  | 51  |
| -CIET | 0.023485 | 1  | 17  | 15  |
| -CISD | 0.023485 | 1  | 17  | 28  |
| -CKTG | 0.023485 | 1  | 17  | 21  |
| -CLAV | 0.023485 | 1  | 17  | 41  |
| -CLDM | 0.023485 | 1  | 17  | 17  |
| -CLET | 0.023485 | 1  | 17  | 63  |
| -CLGA | 0.023485 | 1  | 17  | 46  |
| -CLGM | 0.023485 | 1  | 17  | 30  |
| -CMES | 0.023485 | 1  | 17  | 14  |
| -CNAT | 0.023485 | 1  | 17  | 22  |
| -CNGL | 0.023485 | 1  | 17  | 22  |
| -CNSR | 0.023485 | 2  | 34  | 52  |
| -CPKL | 0.023485 | 1  | 17  | 35  |
| -CPLK | 0.023485 | 2  | 34  | 36  |
| -CPSR | 0.023485 | 2  | 34  | 82  |
| -CQTV | 0.023485 | 1  | 17  | 23  |
| -CSAT | 0.023485 | 1  | 17  | 49  |
| -CSDV | 0.023485 | 2  | 34  | 43  |
| -CSKG | 0.023485 | 1  | 17  | 44  |
| -CVKL | 0.023485 | 1  | 17  | 40  |
| -CVKV | 0.023485 | 1  | 17  | 39  |
| -CVRN | 0.023485 | 1  | 17  | 36  |
| -CVRT | 0.023485 | 1  | 17  | 51  |
| -CVSG | 0.023485 | 1  | 17  | 44  |
| -CYEV | 0.023485 | 1  | 17  | 18  |
| -CETV | 0.024197 | 2  | 33  | 37  |
| -CSTV | 0.024197 | 2  | 33  | 65  |
| -CCES | 0.024953 | 1  | 16  | 26  |

|       |          |   |    |    |
|-------|----------|---|----|----|
| -CCLD | 0.024953 | 1 | 16 | 40 |
| -CDAS | 0.024953 | 1 | 16 | 26 |
| -CDKG | 0.024953 | 1 | 16 | 10 |
| -CESF | 0.024953 | 1 | 16 | 36 |
| -CFTG | 0.024953 | 1 | 16 | 31 |
| -CGKV | 0.024953 | 1 | 16 | 26 |
| -CGSN | 0.024953 | 1 | 16 | 38 |
| -CIPT | 0.024953 | 1 | 16 | 33 |
| -CKFT | 0.024953 | 1 | 16 | 22 |
| -CKTE | 0.024953 | 1 | 16 | 20 |
| -CLDF | 0.024953 | 1 | 16 | 19 |
| -CLDS | 0.024953 | 2 | 32 | 53 |
| -CLGL | 0.024953 | 2 | 32 | 85 |
| -CMNV | 0.024953 | 1 | 16 | 30 |
| -CMPA | 0.024953 | 1 | 16 | 25 |
| -CMTP | 0.024953 | 1 | 16 | 16 |
| -CNTF | 0.024953 | 1 | 16 | 25 |
| -CPML | 0.024953 | 1 | 16 | 26 |
| -CQRK | 0.024953 | 1 | 16 | 22 |
| -CQSV | 0.024953 | 1 | 16 | 21 |
| -CRDT | 0.024953 | 1 | 16 | 23 |
| -CRKL | 0.024953 | 1 | 16 | 61 |
| -CRNR | 0.024953 | 1 | 16 | 42 |
| -CTGQ | 0.024953 | 1 | 16 | 15 |
| -CTPL | 0.024953 | 1 | 16 | 38 |
| -CVGM | 0.024953 | 1 | 16 | 29 |
| -CVPN | 0.024953 | 1 | 16 | 27 |
| -CVQE | 0.024953 | 1 | 16 | 15 |
| -CVSE | 0.025758 | 2 | 31 | 48 |
| -CAKN | 0.026616 | 1 | 15 | 41 |
| -CDDT | 0.026616 | 1 | 15 | 8  |
| -CDKF | 0.026616 | 1 | 15 | 9  |
| -CEAM | 0.026616 | 1 | 15 | 30 |
| -CEFD | 0.026616 | 1 | 15 | 11 |
| -CESW | 0.026616 | 1 | 15 | 15 |
| -CFPE | 0.026616 | 1 | 15 | 12 |
| -CGTF | 0.026616 | 1 | 15 | 33 |
| -CHSG | 0.026616 | 1 | 15 | 30 |
| -CISK | 0.026616 | 1 | 15 | 28 |
| -CKNR | 0.026616 | 1 | 15 | 19 |
| -CKPN | 0.026616 | 1 | 15 | 25 |
| -CLEP | 0.026616 | 1 | 15 | 30 |
| -CLNM | 0.026616 | 1 | 15 | 30 |
| -CLYT | 0.026616 | 1 | 15 | 33 |
| -CMGV | 0.026616 | 1 | 15 | 34 |
| -CNSA | 0.026616 | 2 | 30 | 39 |
| -CPFS | 0.026616 | 1 | 15 | 22 |
| -CPTF | 0.026616 | 1 | 15 | 32 |
| -CPVG | 0.026616 | 1 | 15 | 40 |
| -CRPR | 0.026616 | 1 | 15 | 58 |
| -CSAK | 0.026616 | 1 | 15 | 31 |
| -CSDC | 0.026616 | 1 | 15 | 15 |
| -CSNI | 0.026616 | 1 | 15 | 13 |
| -CSPT | 0.026616 | 2 | 30 | 69 |
| -CTKV | 0.026616 | 1 | 15 | 27 |
| -CTMG | 0.026616 | 1 | 15 | 17 |
| -CTNI | 0.026616 | 1 | 15 | 27 |

|       |          |   |    |    |
|-------|----------|---|----|----|
| -CTYR | 0.026616 | 1 | 15 | 49 |
| -CVAL | 0.026616 | 1 | 15 | 37 |
| -CYIK | 0.026616 | 1 | 15 | 11 |
| -CGLT | 0.027534 | 2 | 29 | 47 |
| -CKLL | 0.027534 | 2 | 29 | 65 |
| -CSKS | 0.027534 | 2 | 29 | 67 |
| -CTTG | 0.027534 | 2 | 29 | 50 |
| -CLTV | 0.027854 | 3 | 43 | 78 |
| -CALD | 0.028518 | 1 | 14 | 36 |
| -CAME | 0.028518 | 1 | 14 | 18 |
| -CASP | 0.028518 | 1 | 14 | 52 |
| -CDCL | 0.028518 | 1 | 14 | 25 |
| -CDEE | 0.028518 | 1 | 14 | 5  |
| -CDEQ | 0.028518 | 1 | 14 | 11 |
| -CDGG | 0.028518 | 1 | 14 | 17 |
| -CDLD | 0.028518 | 1 | 14 | 18 |
| -CEKS | 0.028518 | 1 | 14 | 17 |
| -CETC | 0.028518 | 1 | 14 | 13 |
| -CGGV | 0.028518 | 1 | 14 | 23 |
| -CGHS | 0.028518 | 1 | 14 | 25 |
| -CGKF | 0.028518 | 1 | 14 | 20 |
| -CGKR | 0.028518 | 1 | 14 | 53 |
| -CGSM | 0.028518 | 1 | 14 | 33 |
| -CIEG | 0.028518 | 1 | 14 | 15 |
| -CIGR | 0.028518 | 1 | 14 | 35 |
| -CIKT | 0.028518 | 1 | 14 | 19 |
| -CISI | 0.028518 | 2 | 28 | 51 |
| -CIVK | 0.028518 | 1 | 14 | 19 |
| -CKGI | 0.028518 | 1 | 14 | 12 |
| -CKML | 0.028518 | 1 | 14 | 29 |
| -CKPS | 0.028518 | 1 | 14 | 37 |
| -CKTP | 0.028518 | 1 | 14 | 27 |
| -CKTT | 0.028518 | 1 | 14 | 23 |
| -CLEA | 0.028518 | 1 | 14 | 17 |
| -CLEM | 0.028518 | 1 | 14 | 25 |
| -CLHT | 0.028518 | 1 | 14 | 24 |
| -CLKN | 0.028518 | 1 | 14 | 26 |
| -CMKS | 0.028518 | 1 | 14 | 16 |
| -CMSP | 0.028518 | 1 | 14 | 31 |
| -CNEF | 0.028518 | 1 | 14 | 16 |
| -CNMK | 0.028518 | 1 | 14 | 15 |
| -CNML | 0.028518 | 1 | 14 | 41 |
| -CNQN | 0.028518 | 1 | 14 | 26 |
| -CNSD | 0.028518 | 1 | 14 | 22 |
| -CNTG | 0.028518 | 1 | 14 | 41 |
| -CPDE | 0.028518 | 1 | 14 | 16 |
| -CPDG | 0.028518 | 1 | 14 | 24 |
| -CPGY | 0.028518 | 1 | 14 | 10 |
| -CPIG | 0.028518 | 1 | 14 | 34 |
| -CPNE | 0.028518 | 1 | 14 | 16 |
| -CPRE | 0.028518 | 1 | 14 | 36 |
| -CQDV | 0.028518 | 1 | 14 | 14 |
| -CRAL | 0.028518 | 2 | 28 | 62 |
| -CRTA | 0.028518 | 1 | 14 | 55 |
| -CSHT | 0.028518 | 1 | 14 | 34 |
| -CTRE | 0.028518 | 1 | 14 | 31 |
| -CTRN | 0.028518 | 1 | 14 | 46 |

|       |          |   |    |    |
|-------|----------|---|----|----|
| -CVRG | 0.028518 | 1 | 14 | 27 |
| -CVRH | 0.028518 | 1 | 14 | 26 |
| -CVSR | 0.028518 | 2 | 28 | 54 |
| -CVTD | 0.028518 | 1 | 14 | 22 |
| -CPRS | 0.028518 | 3 | 42 | 96 |
| -CPLT | 0.029574 | 2 | 27 | 55 |
| -CSES | 0.029574 | 4 | 54 | 37 |
| -CSNS | 0.029943 | 3 | 40 | 70 |
| -CAAS | 0.030711 | 1 | 13 | 43 |
| -CAKM | 0.030711 | 1 | 13 | 17 |
| -CANR | 0.030711 | 1 | 13 | 43 |
| -CASC | 0.030711 | 1 | 13 | 34 |
| -CASG | 0.030711 | 1 | 13 | 38 |
| -CATG | 0.030711 | 1 | 13 | 38 |
| -CCPL | 0.030711 | 1 | 13 | 27 |
| -CCWA | 0.030711 | 1 | 13 | 13 |
| -CDGE | 0.030711 | 1 | 13 | 15 |
| -CDNS | 0.030711 | 1 | 13 | 31 |
| -CEGC | 0.030711 | 2 | 26 | 26 |
| -CELE | 0.030711 | 1 | 13 | 22 |
| -CERV | 0.030711 | 1 | 13 | 12 |
| -CESE | 0.030711 | 1 | 13 | 20 |
| -CESG | 0.030711 | 1 | 13 | 29 |
| -CETT | 0.030711 | 1 | 13 | 33 |
| -CFDM | 0.030711 | 1 | 13 | 15 |
| -CFQE | 0.030711 | 1 | 13 | 14 |
| -CGSG | 0.030711 | 1 | 13 | 39 |
| -CGTE | 0.030711 | 1 | 13 | 16 |
| -CHLK | 0.030711 | 1 | 13 | 32 |
| -CHSE | 0.030711 | 1 | 13 | 25 |
| -CKAR | 0.030711 | 1 | 13 | 28 |
| -CKGR | 0.030711 | 1 | 13 | 19 |
| -CKLE | 0.030711 | 1 | 13 | 23 |
| -CKNT | 0.030711 | 1 | 13 | 20 |
| -CKPL | 0.030711 | 1 | 13 | 24 |
| -CKRK | 0.030711 | 1 | 13 | 27 |
| -CKSN | 0.030711 | 1 | 13 | 28 |
| -CLNP | 0.030711 | 1 | 13 | 41 |
| -CLNS | 0.030711 | 2 | 26 | 33 |
| -CLPV | 0.030711 | 2 | 26 | 56 |
| -CLSF | 0.030711 | 1 | 13 | 36 |
| -CLSP | 0.030711 | 1 | 13 | 60 |
| -CLTD | 0.030711 | 1 | 13 | 42 |
| -CLTK | 0.030711 | 2 | 26 | 25 |
| -CMAS | 0.030711 | 1 | 13 | 29 |
| -CPAT | 0.030711 | 1 | 13 | 45 |
| -CPGA | 0.030711 | 1 | 13 | 19 |
| -CPTR | 0.030711 | 2 | 26 | 41 |
| -CPVV | 0.030711 | 1 | 13 | 51 |
| -CQDR | 0.030711 | 1 | 13 | 16 |
| -CQMK | 0.030711 | 1 | 13 | 10 |
| -CQSN | 0.030711 | 1 | 13 | 19 |
| -CRDQ | 0.030711 | 1 | 13 | 11 |
| -CRGV | 0.030711 | 1 | 13 | 40 |
| -CRLK | 0.030711 | 1 | 13 | 39 |
| -CSAP | 0.030711 | 1 | 13 | 30 |
| -CSHK | 0.030711 | 1 | 13 | 16 |

|       |          |   |    |     |
|-------|----------|---|----|-----|
| -CSKM | 0.030711 | 1 | 13 | 19  |
| -CSKR | 0.030711 | 1 | 13 | 54  |
| -CSQG | 0.030711 | 1 | 13 | 30  |
| -CTDK | 0.030711 | 1 | 13 | 16  |
| -CTEI | 0.030711 | 1 | 13 | 26  |
| -CTEV | 0.030711 | 1 | 13 | 26  |
| -CTGL | 0.030711 | 1 | 13 | 36  |
| -CTTN | 0.030711 | 1 | 13 | 29  |
| -CVAG | 0.030711 | 1 | 13 | 19  |
| -CVEA | 0.030711 | 1 | 13 | 24  |
| -CVER | 0.030711 | 1 | 13 | 35  |
| -CVPL | 0.030711 | 1 | 13 | 47  |
| -CVVK | 0.030711 | 1 | 13 | 28  |
| -CYEE | 0.030711 | 1 | 13 | 14  |
| -CYEG | 0.030711 | 1 | 13 | 24  |
| -CYSF | 0.030711 | 1 | 13 | 14  |
| -CYSP | 0.030711 | 1 | 13 | 25  |
| -CYTL | 0.030711 | 1 | 13 | 45  |
| -CSSR | 0.031313 | 4 | 51 | 105 |
| -CREL | 0.031519 | 3 | 38 | 46  |
| -CATL | 0.03194  | 2 | 25 | 56  |
| -CFSN | 0.03194  | 2 | 25 | 31  |
| -CFST | 0.03194  | 2 | 25 | 31  |
| -CLSK | 0.03194  | 2 | 25 | 57  |
| -CREV | 0.03194  | 2 | 25 | 42  |
| -CTDM | 0.03194  | 2 | 25 | 18  |
| -CTDS | 0.03194  | 2 | 25 | 43  |
| -CYSL | 0.03194  | 2 | 25 | 66  |
| -CAKP | 0.03327  | 1 | 12 | 27  |
| -CANE | 0.03327  | 1 | 12 | 12  |
| -CCKK | 0.03327  | 1 | 12 | 18  |
| -CDFR | 0.03327  | 1 | 12 | 39  |
| -CDFT | 0.03327  | 1 | 12 | 11  |
| -CDGN | 0.03327  | 1 | 12 | 12  |
| -CDHF | 0.03327  | 1 | 12 | 16  |
| -CDIP | 0.03327  | 1 | 12 | 18  |
| -CDKY | 0.03327  | 1 | 12 | 13  |
| -CDLG | 0.03327  | 1 | 12 | 15  |
| -CDNV | 0.03327  | 1 | 12 | 12  |
| -CDNY | 0.03327  | 1 | 12 | 24  |
| -CELK | 0.03327  | 1 | 12 | 18  |
| -CERG | 0.03327  | 1 | 12 | 27  |
| -CERI | 0.03327  | 1 | 12 | 13  |
| -CETK | 0.03327  | 1 | 12 | 13  |
| -CFGR | 0.03327  | 1 | 12 | 32  |
| -CFGV | 0.03327  | 1 | 12 | 26  |
| -CGGE | 0.03327  | 1 | 12 | 8   |
| -CGMD | 0.03327  | 1 | 12 | 15  |
| -CGMS | 0.03327  | 1 | 12 | 26  |
| -CGRF | 0.03327  | 1 | 12 | 18  |
| -CGTY | 0.03327  | 1 | 12 | 27  |
| -CHFS | 0.03327  | 1 | 12 | 32  |
| -CHSP | 0.03327  | 2 | 24 | 46  |
| -CIGE | 0.03327  | 1 | 12 | 11  |
| -CIGP | 0.03327  | 1 | 12 | 39  |
| -CIRT | 0.03327  | 2 | 24 | 44  |
| -CITG | 0.03327  | 1 | 12 | 11  |

|       |          |   |    |     |
|-------|----------|---|----|-----|
| -CKAN | 0.03327  | 1 | 12 | 15  |
| -CKDE | 0.03327  | 1 | 12 | 21  |
| -CKGM | 0.03327  | 1 | 12 | 20  |
| -CKLD | 0.03327  | 1 | 12 | 25  |
| -CKLK | 0.03327  | 1 | 12 | 40  |
| -CKRM | 0.03327  | 1 | 12 | 29  |
| -CKRR | 0.03327  | 1 | 12 | 44  |
| -CKVR | 0.03327  | 2 | 24 | 34  |
| -CKYL | 0.03327  | 1 | 12 | 14  |
| -CLAT | 0.03327  | 1 | 12 | 44  |
| -CLEH | 0.03327  | 1 | 12 | 17  |
| -CLFI | 0.03327  | 1 | 12 | 17  |
| -CLGI | 0.03327  | 1 | 12 | 23  |
| -CLNE | 0.03327  | 1 | 12 | 23  |
| -CMNA | 0.03327  | 1 | 12 | 10  |
| -CMTA | 0.03327  | 1 | 12 | 13  |
| -CMTV | 0.03327  | 1 | 12 | 24  |
| -CNEV | 0.03327  | 1 | 12 | 25  |
| -CNIE | 0.03327  | 1 | 12 | 8   |
| -CNST | 0.03327  | 1 | 12 | 37  |
| -CNTE | 0.03327  | 1 | 12 | 30  |
| -CPKE | 0.03327  | 1 | 12 | 21  |
| -CPMA | 0.03327  | 1 | 12 | 19  |
| -CQCL | 0.03327  | 1 | 12 | 26  |
| -CQDS | 0.03327  | 1 | 12 | 17  |
| -CQGT | 0.03327  | 1 | 12 | 24  |
| -CQLK | 0.03327  | 1 | 12 | 13  |
| -CQRT | 0.03327  | 1 | 12 | 34  |
| -CRAE | 0.03327  | 1 | 12 | 28  |
| -CRNA | 0.03327  | 1 | 12 | 40  |
| -CRND | 0.03327  | 1 | 12 | 15  |
| -CRNE | 0.03327  | 1 | 12 | 39  |
| -CSAF | 0.03327  | 1 | 12 | 30  |
| -CSHR | 0.03327  | 1 | 12 | 36  |
| -CSKI | 0.03327  | 1 | 12 | 36  |
| -CTKW | 0.03327  | 1 | 12 | 31  |
| -CTPI | 0.03327  | 1 | 12 | 21  |
| -CTRL | 0.03327  | 2 | 24 | 100 |
| -CTRT | 0.03327  | 2 | 24 | 52  |
| -CTYK | 0.03327  | 1 | 12 | 25  |
| -CVEM | 0.03327  | 1 | 12 | 23  |
| -CVGV | 0.03327  | 2 | 24 | 27  |
| -CVRA | 0.03327  | 2 | 24 | 77  |
| -CVSP | 0.03327  | 1 | 12 | 49  |
| -CVTA | 0.03327  | 1 | 12 | 38  |
| -CVYP | 0.03327  | 1 | 12 | 36  |
| -CVYS | 0.03327  | 1 | 12 | 45  |
| -CWEN | 0.03327  | 1 | 12 | 2   |
| -CWPG | 0.03327  | 1 | 12 | 12  |
| -CYAT | 0.03327  | 1 | 12 | 20  |
| -CYCA | 0.03327  | 1 | 12 | 22  |
| -CYQL | 0.03327  | 1 | 12 | 40  |
| -CYSI | 0.03327  | 1 | 12 | 17  |
| -CGVL | 0.03327  | 3 | 36 | 71  |
| -CSSG | 0.03327  | 3 | 36 | 77  |
| -CSTS | 0.03327  | 3 | 36 | 117 |
| -CTTV | 0.034221 | 3 | 35 | 48  |



|       |          |   |    |    |
|-------|----------|---|----|----|
| -CART | 0.034717 | 2 | 23 | 64 |
| -CIKS | 0.034717 | 2 | 23 | 39 |
| -CPRR | 0.034717 | 2 | 23 | 66 |
| -CPSE | 0.034717 | 2 | 23 | 38 |
| -CPTE | 0.034717 | 2 | 23 | 21 |
| -CSRK | 0.034717 | 2 | 23 | 51 |
| -CTPR | 0.034717 | 2 | 23 | 45 |
| -CVQG | 0.034717 | 2 | 23 | 31 |
| -CAGV | 0.036295 | 1 | 11 | 25 |
| -CAPE | 0.036295 | 1 | 11 | 17 |
| -CARE | 0.036295 | 1 | 11 | 20 |
| -CAYG | 0.036295 | 1 | 11 | 27 |
| -CCDE | 0.036295 | 1 | 11 | 12 |
| -CCDT | 0.036295 | 1 | 11 | 11 |
| -CDFA | 0.036295 | 1 | 11 | 17 |
| -CDGI | 0.036295 | 1 | 11 | 24 |
| -CDGR | 0.036295 | 1 | 11 | 29 |
| -CDHT | 0.036295 | 1 | 11 | 20 |
| -CDKI | 0.036295 | 1 | 11 | 11 |
| -CDSE | 0.036295 | 1 | 11 | 18 |
| -CDSS | 0.036295 | 4 | 44 | 53 |
| -CECA | 0.036295 | 1 | 11 | 11 |
| -CEFK | 0.036295 | 1 | 11 | 15 |
| -CEGR | 0.036295 | 1 | 11 | 23 |
| -CERD | 0.036295 | 1 | 11 | 22 |
| -CERY | 0.036295 | 1 | 11 | 16 |
| -CESK | 0.036295 | 2 | 22 | 34 |
| -CETS | 0.036295 | 1 | 11 | 18 |
| -CEYE | 0.036295 | 1 | 11 | 12 |
| -CEYV | 0.036295 | 1 | 11 | 15 |
| -CFDV | 0.036295 | 1 | 11 | 18 |
| -CFKT | 0.036295 | 1 | 11 | 8  |
| -CGAM | 0.036295 | 1 | 11 | 12 |
| -CGDK | 0.036295 | 1 | 11 | 21 |
| -CGFD | 0.036295 | 1 | 11 | 19 |
| -CGFS | 0.036295 | 1 | 11 | 26 |
| -CGGD | 0.036295 | 1 | 11 | 11 |
| -CGLN | 0.036295 | 1 | 11 | 48 |
| -CGTQ | 0.036295 | 1 | 11 | 28 |
| -CGTV | 0.036295 | 1 | 11 | 28 |
| -CIRK | 0.036295 | 1 | 11 | 33 |
| -CKCY | 0.036295 | 1 | 11 | 18 |
| -CKNG | 0.036295 | 2 | 22 | 21 |
| -CKPR | 0.036295 | 1 | 11 | 26 |
| -CKQK | 0.036295 | 1 | 11 | 16 |
| -CKRG | 0.036295 | 1 | 11 | 31 |
| -CLKR | 0.036295 | 2 | 22 | 50 |
| -CLKV | 0.036295 | 1 | 11 | 47 |
| -CLNI | 0.036295 | 1 | 11 | 19 |
| -CLRY | 0.036295 | 1 | 11 | 51 |
| -CLTI | 0.036295 | 2 | 22 | 36 |
| -CMDT | 0.036295 | 1 | 11 | 14 |
| -CMPK | 0.036295 | 1 | 11 | 26 |
| -CMPV | 0.036295 | 1 | 11 | 28 |
| -CNDE | 0.036295 | 1 | 11 | 19 |
| -CNTD | 0.036295 | 2 | 22 | 15 |
| -CNTV | 0.036295 | 1 | 11 | 41 |

|       |          |   |    |     |
|-------|----------|---|----|-----|
| -CNVY | 0.036295 | 1 | 11 | 25  |
| -CPFA | 0.036295 | 1 | 11 | 34  |
| -CPLD | 0.036295 | 1 | 11 | 24  |
| -CPTA | 0.036295 | 1 | 11 | 27  |
| -CQAL | 0.036295 | 1 | 11 | 30  |
| -CQAS | 0.036295 | 1 | 11 | 28  |
| -CQKL | 0.036295 | 1 | 11 | 22  |
| -CQRL | 0.036295 | 1 | 11 | 30  |
| -CRCE | 0.036295 | 1 | 11 | 24  |
| -CRHG | 0.036295 | 1 | 11 | 37  |
| -CRRG | 0.036295 | 2 | 22 | 52  |
| -CRSN | 0.036295 | 1 | 11 | 48  |
| -CRTT | 0.036295 | 2 | 22 | 48  |
| -CRWS | 0.036295 | 1 | 11 | 46  |
| -CRWT | 0.036295 | 1 | 11 | 17  |
| -CRYD | 0.036295 | 1 | 11 | 39  |
| -CTEG | 0.036295 | 1 | 11 | 27  |
| -CTER | 0.036295 | 1 | 11 | 34  |
| -CTES | 0.036295 | 3 | 33 | 46  |
| -CTGE | 0.036295 | 1 | 11 | 18  |
| -CTGK | 0.036295 | 1 | 11 | 29  |
| -CTHT | 0.036295 | 1 | 11 | 29  |
| -CTKG | 0.036295 | 1 | 11 | 26  |
| -CTKK | 0.036295 | 1 | 11 | 32  |
| -CTNC | 0.036295 | 1 | 11 | 36  |
| -CTNL | 0.036295 | 2 | 22 | 42  |
| -CTRK | 0.036295 | 1 | 11 | 39  |
| -CTSD | 0.036295 | 2 | 22 | 32  |
| -CVAD | 0.036295 | 1 | 11 | 22  |
| -CVAP | 0.036295 | 1 | 11 | 36  |
| -CVEK | 0.036295 | 1 | 11 | 19  |
| -CVEV | 0.036295 | 1 | 11 | 17  |
| -CVKA | 0.036295 | 1 | 11 | 14  |
| -CVLI | 0.036295 | 1 | 11 | 42  |
| -CVMG | 0.036295 | 1 | 11 | 40  |
| -CVRM | 0.036295 | 1 | 11 | 37  |
| -CYAI | 0.036295 | 1 | 11 | 17  |
| -CYEL | 0.036295 | 1 | 11 | 17  |
| -CYGA | 0.036295 | 1 | 11 | 22  |
| -CYSR | 0.036295 | 1 | 11 | 30  |
| -CYTS | 0.036295 | 2 | 22 | 46  |
| -CGPS | 0.037429 | 3 | 32 | 57  |
| -CSTA | 0.037429 | 3 | 32 | 61  |
| -CDSV | 0.038023 | 2 | 21 | 38  |
| -CDVT | 0.038023 | 2 | 21 | 58  |
| -CGLD | 0.038023 | 2 | 21 | 43  |
| -CLNK | 0.038023 | 2 | 21 | 25  |
| -CPQK | 0.038023 | 2 | 21 | 15  |
| -CRPL | 0.038023 | 2 | 21 | 49  |
| -CRPV | 0.038023 | 2 | 21 | 38  |
| -CSQS | 0.038023 | 2 | 21 | 51  |
| -CSTL | 0.038023 | 4 | 42 | 113 |
| -CYET | 0.038023 | 2 | 21 | 24  |
| -CYSN | 0.038023 | 2 | 21 | 26  |
| -CEGV | 0.038637 | 3 | 31 | 32  |
| -CLLK | 0.038637 | 3 | 31 | 73  |
| -CLTG | 0.038637 | 3 | 31 | 38  |

|       |          |   |    |     |
|-------|----------|---|----|-----|
| -CPSL | 0.039142 | 5 | 51 | 95  |
| -CAAG | 0.039925 | 1 | 10 | 16  |
| -CAEG | 0.039925 | 1 | 10 | 10  |
| -CAHN | 0.039925 | 1 | 10 | 32  |
| -CALI | 0.039925 | 1 | 10 | 37  |
| -CANI | 0.039925 | 1 | 10 | 7   |
| -CARM | 0.039925 | 1 | 10 | 30  |
| -CASE | 0.039925 | 1 | 10 | 29  |
| -CCEN | 0.039925 | 1 | 10 | 17  |
| -CCGE | 0.039925 | 1 | 10 | 23  |
| -CCSI | 0.039925 | 1 | 10 | 27  |
| -CCTT | 0.039925 | 1 | 10 | 27  |
| -CDGV | 0.039925 | 1 | 10 | 31  |
| -CDHG | 0.039925 | 1 | 10 | 6   |
| -CDLF | 0.039925 | 1 | 10 | 14  |
| -CDME | 0.039925 | 2 | 20 | 17  |
| -CDNM | 0.039925 | 1 | 10 | 27  |
| -CDNN | 0.039925 | 1 | 10 | 24  |
| -CDPV | 0.039925 | 2 | 20 | 37  |
| -CDSF | 0.039925 | 1 | 10 | 25  |
| -CEAV | 0.039925 | 1 | 10 | 11  |
| -CEER | 0.039925 | 1 | 10 | 12  |
| -CEEY | 0.039925 | 1 | 10 | 12  |
| -CEFP | 0.039925 | 1 | 10 | 13  |
| -CEGL | 0.039925 | 1 | 10 | 32  |
| -CENR | 0.039925 | 1 | 10 | 21  |
| -CEQC | 0.039925 | 1 | 10 | 12  |
| -CERM | 0.039925 | 2 | 20 | 25  |
| -CERQ | 0.039925 | 1 | 10 | 14  |
| -CESA | 0.039925 | 1 | 10 | 24  |
| -CFPH | 0.039925 | 1 | 10 | 12  |
| -CFTK | 0.039925 | 1 | 10 | 12  |
| -CGGS | 0.039925 | 2 | 20 | 40  |
| -CGKL | 0.039925 | 2 | 20 | 44  |
| -CGTN | 0.039925 | 1 | 10 | 20  |
| -CGVD | 0.039925 | 1 | 10 | 21  |
| -CHGD | 0.039925 | 1 | 10 | 9   |
| -CHSS | 0.039925 | 2 | 20 | 35  |
| -CHST | 0.039925 | 1 | 10 | 51  |
| -CHTE | 0.039925 | 1 | 10 | 20  |
| -CIPR | 0.039925 | 1 | 10 | 24  |
| -CIRQ | 0.039925 | 1 | 10 | 22  |
| -CISG | 0.039925 | 2 | 20 | 27  |
| -CKGS | 0.039925 | 1 | 10 | 23  |
| -CKKC | 0.039925 | 1 | 10 | 12  |
| -CKNS | 0.039925 | 1 | 10 | 21  |
| -CKPT | 0.039925 | 1 | 10 | 17  |
| -CLAK | 0.039925 | 2 | 20 | 34  |
| -CLAR | 0.039925 | 3 | 30 | 59  |
| -CLES | 0.039925 | 2 | 20 | 48  |
| -CLEY | 0.039925 | 1 | 10 | 17  |
| -CLFD | 0.039925 | 1 | 10 | 22  |
| -CLKD | 0.039925 | 1 | 10 | 12  |
| -CLKK | 0.039925 | 1 | 10 | 19  |
| -CLNV | 0.039925 | 2 | 20 | 31  |
| -CLPL | 0.039925 | 2 | 20 | 116 |
| -CLYA | 0.039925 | 1 | 10 | 30  |

|       |          |   |    |    |
|-------|----------|---|----|----|
| -CMEF | 0.039925 | 1 | 10 | 15 |
| -CMRS | 0.039925 | 2 | 20 | 48 |
| -CMSE | 0.039925 | 2 | 20 | 34 |
| -CMTE | 0.039925 | 1 | 10 | 20 |
| -CMTS | 0.039925 | 2 | 20 | 43 |
| -CNAW | 0.039925 | 1 | 10 | 17 |
| -CNDS | 0.039925 | 1 | 10 | 23 |
| -CNEL | 0.039925 | 1 | 10 | 32 |
| -CNLK | 0.039925 | 2 | 20 | 40 |
| -CNRF | 0.039925 | 1 | 10 | 18 |
| -CNRG | 0.039925 | 1 | 10 | 36 |
| -CNSF | 0.039925 | 1 | 10 | 41 |
| -CPAW | 0.039925 | 1 | 10 | 27 |
| -CPGQ | 0.039925 | 1 | 10 | 10 |
| -CPHE | 0.039925 | 1 | 10 | 16 |
| -CPMS | 0.039925 | 1 | 10 | 45 |
| -CPNS | 0.039925 | 3 | 30 | 34 |
| -CPQT | 0.039925 | 1 | 10 | 24 |
| -CPQV | 0.039925 | 1 | 10 | 24 |
| -CPRQ | 0.039925 | 1 | 10 | 29 |
| -CPYS | 0.039925 | 1 | 10 | 34 |
| -CQET | 0.039925 | 1 | 10 | 16 |
| -CQNM | 0.039925 | 1 | 10 | 12 |
| -CQTR | 0.039925 | 1 | 10 | 40 |
| -CRAK | 0.039925 | 2 | 20 | 46 |
| -CRAQ | 0.039925 | 1 | 10 | 30 |
| -CRDN | 0.039925 | 1 | 10 | 23 |
| -CREI | 0.039925 | 1 | 10 | 14 |
| -CRKR | 0.039925 | 2 | 20 | 44 |
| -CRKS | 0.039925 | 2 | 20 | 55 |
| -CRNY | 0.039925 | 1 | 10 | 21 |
| -CRTI | 0.039925 | 1 | 10 | 19 |
| -CSEE | 0.039925 | 1 | 10 | 15 |
| -CSKD | 0.039925 | 2 | 20 | 18 |
| -CSKP | 0.039925 | 1 | 10 | 35 |
| -CSNA | 0.039925 | 1 | 10 | 32 |
| -CSRN | 0.039925 | 2 | 20 | 60 |
| -CSVK | 0.039925 | 2 | 20 | 42 |
| -CTAH | 0.039925 | 1 | 10 | 18 |
| -CTCG | 0.039925 | 1 | 10 | 14 |
| -CTGD | 0.039925 | 1 | 10 | 6  |
| -CTNG | 0.039925 | 1 | 10 | 20 |
| -CTQN | 0.039925 | 1 | 10 | 26 |
| -CTSN | 0.039925 | 2 | 20 | 40 |
| -CTWV | 0.039925 | 1 | 10 | 33 |
| -CVAV | 0.039925 | 2 | 20 | 20 |
| -CVDN | 0.039925 | 1 | 10 | 19 |
| -CVEG | 0.039925 | 1 | 10 | 15 |
| -CVHN | 0.039925 | 1 | 10 | 23 |
| -CVHS | 0.039925 | 1 | 10 | 50 |
| -CVSY | 0.039925 | 1 | 10 | 32 |
| -CWGV | 0.039925 | 1 | 10 | 23 |
| -CWTK | 0.039925 | 1 | 10 | 9  |
| -CWTR | 0.039925 | 1 | 10 | 32 |
| -CYHF | 0.039925 | 1 | 10 | 11 |
| -CYLE | 0.039925 | 1 | 10 | 29 |
| -CYRE | 0.039925 | 1 | 10 | 25 |

|       |          |   |    |    |
|-------|----------|---|----|----|
| -CYRM | 0.039925 | 1 | 10 | 24 |
| -CYTH | 0.039925 | 1 | 10 | 14 |
| -CYWR | 0.039925 | 1 | 10 | 28 |
| -CELT | 0.041301 | 3 | 29 | 36 |
| -CLKL | 0.041301 | 3 | 29 | 68 |
| -CQTE | 0.041301 | 3 | 29 | 17 |
| -CSGL | 0.041301 | 3 | 29 | 77 |
| -CSKV | 0.041301 | 3 | 29 | 77 |
| -CTSK | 0.041301 | 3 | 29 | 40 |
| -CEES | 0.042026 | 2 | 19 | 15 |
| -CESD | 0.042026 | 2 | 19 | 21 |
| -CGEE | 0.042026 | 2 | 19 | 13 |
| -CGLE | 0.042026 | 2 | 19 | 43 |
| -CISR | 0.042026 | 2 | 19 | 33 |
| -CLAE | 0.042026 | 2 | 19 | 19 |
| -CLAN | 0.042026 | 2 | 19 | 60 |
| -CLQV | 0.042026 | 2 | 19 | 36 |
| -CLSI | 0.042026 | 2 | 19 | 36 |
| -CMSL | 0.042026 | 4 | 38 | 64 |
| -CNKT | 0.042026 | 2 | 19 | 19 |
| -CPPK | 0.042026 | 2 | 19 | 18 |
| -CPRV | 0.042026 | 2 | 19 | 55 |
| -CQDL | 0.042026 | 2 | 19 | 32 |
| -CRAS | 0.042026 | 2 | 19 | 51 |
| -CRTE | 0.042026 | 2 | 19 | 25 |
| -CSGE | 0.042026 | 2 | 19 | 41 |
| -CSLK | 0.042026 | 2 | 19 | 64 |
| -CSRI | 0.042026 | 2 | 19 | 47 |
| -CSSW | 0.042026 | 2 | 19 | 51 |
| -CVAN | 0.042026 | 2 | 19 | 25 |
| -CVGA | 0.042026 | 2 | 19 | 20 |
| -CVPK | 0.042026 | 2 | 19 | 21 |
| -CVRD | 0.042026 | 2 | 19 | 30 |
| -CLRv | 0.042473 | 5 | 47 | 74 |
| -CLGS | 0.042776 | 3 | 28 | 71 |
| -CLPP | 0.042776 | 3 | 28 | 30 |
| -CPTT | 0.042776 | 3 | 28 | 42 |
| -CTGT | 0.042776 | 3 | 28 | 40 |
| -CAAV | 0.044361 | 1 | 9  | 30 |
| -CADT | 0.044361 | 1 | 9  | 31 |
| -CAFD | 0.044361 | 1 | 9  | 23 |
| -CAHS | 0.044361 | 1 | 9  | 27 |
| -CAIR | 0.044361 | 1 | 9  | 38 |
| -CAKA | 0.044361 | 1 | 9  | 24 |
| -CAKG | 0.044361 | 2 | 18 | 27 |
| -CALE | 0.044361 | 1 | 9  | 29 |
| -CANV | 0.044361 | 1 | 9  | 12 |
| -CAQL | 0.044361 | 2 | 18 | 42 |
| -CAQN | 0.044361 | 1 | 9  | 12 |
| -CARP | 0.044361 | 1 | 9  | 43 |
| -CAVG | 0.044361 | 1 | 9  | 22 |
| -CCTA | 0.044361 | 1 | 9  | 5  |
| -CDAI | 0.044361 | 1 | 9  | 22 |
| -CDCD | 0.044361 | 2 | 18 | 8  |
| -CDDE | 0.044361 | 1 | 9  | 14 |
| -CDGS | 0.044361 | 2 | 18 | 39 |
| -CDKT | 0.044361 | 1 | 9  | 21 |

|       |          |   |    |    |
|-------|----------|---|----|----|
| -CDYR | 0.044361 | 1 | 9  | 30 |
| -CEAI | 0.044361 | 1 | 9  | 13 |
| -CEDP | 0.044361 | 1 | 9  | 14 |
| -CEDR | 0.044361 | 1 | 9  | 8  |
| -CEFL | 0.044361 | 1 | 9  | 19 |
| -CEFS | 0.044361 | 1 | 9  | 23 |
| -CEHN | 0.044361 | 1 | 9  | 17 |
| -CEIG | 0.044361 | 1 | 9  | 11 |
| -CEKQ | 0.044361 | 1 | 9  | 5  |
| -CEKR | 0.044361 | 1 | 9  | 21 |
| -CEMA | 0.044361 | 1 | 9  | 16 |
| -CENH | 0.044361 | 2 | 18 | 20 |
| -CEPC | 0.044361 | 1 | 9  | 15 |
| -CEPF | 0.044361 | 1 | 9  | 13 |
| -CFEL | 0.044361 | 1 | 9  | 20 |
| -CFGT | 0.044361 | 1 | 9  | 17 |
| -CFPR | 0.044361 | 1 | 9  | 26 |
| -CFPT | 0.044361 | 1 | 9  | 16 |
| -CFTV | 0.044361 | 1 | 9  | 26 |
| -CFVN | 0.044361 | 1 | 9  | 23 |
| -CFVP | 0.044361 | 1 | 9  | 22 |
| -CGAA | 0.044361 | 1 | 9  | 12 |
| -CGAQ | 0.044361 | 1 | 9  | 19 |
| -CGEA | 0.044361 | 1 | 9  | 16 |
| -CGEY | 0.044361 | 1 | 9  | 12 |
| -CGGI | 0.044361 | 2 | 18 | 17 |
| -CGMV | 0.044361 | 1 | 9  | 16 |
| -CGND | 0.044361 | 1 | 9  | 11 |
| -CHEF | 0.044361 | 1 | 9  | 11 |
| -CHIE | 0.044361 | 1 | 9  | 10 |
| -CHPL | 0.044361 | 1 | 9  | 21 |
| -CHRE | 0.044361 | 1 | 9  | 29 |
| -CHTP | 0.044361 | 1 | 9  | 19 |
| -CIGG | 0.044361 | 1 | 9  | 16 |
| -CIHD | 0.044361 | 1 | 9  | 20 |
| -CIHR | 0.044361 | 1 | 9  | 18 |
| -CIRN | 0.044361 | 1 | 9  | 14 |
| -CITE | 0.044361 | 2 | 18 | 11 |
| -CIYK | 0.044361 | 1 | 9  | 31 |
| -CKAM | 0.044361 | 1 | 9  | 12 |
| -CKAV | 0.044361 | 1 | 9  | 19 |
| -CKCV | 0.044361 | 1 | 9  | 11 |
| -CKDV | 0.044361 | 2 | 18 | 14 |
| -CKKI | 0.044361 | 1 | 9  | 12 |
| -CKMK | 0.044361 | 1 | 9  | 11 |
| -CKPG | 0.044361 | 1 | 9  | 16 |
| -CKRQ | 0.044361 | 1 | 9  | 14 |
| -CKVV | 0.044361 | 1 | 9  | 25 |
| -CLDG | 0.044361 | 1 | 9  | 17 |
| -CLDN | 0.044361 | 1 | 9  | 20 |
| -CLGD | 0.044361 | 1 | 9  | 20 |
| -CLNC | 0.044361 | 1 | 9  | 17 |
| -CLPE | 0.044361 | 2 | 18 | 32 |
| -CLPH | 0.044361 | 2 | 18 | 13 |
| -CLQG | 0.044361 | 1 | 9  | 26 |
| -CLTH | 0.044361 | 1 | 9  | 35 |
| -CLVK | 0.044361 | 1 | 9  | 18 |

|       |          |   |    |    |
|-------|----------|---|----|----|
| -CMDG | 0.044361 | 1 | 9  | 15 |
| -CMEV | 0.044361 | 1 | 9  | 15 |
| -CMGG | 0.044361 | 1 | 9  | 13 |
| -CMRQ | 0.044361 | 1 | 9  | 30 |
| -CMSN | 0.044361 | 1 | 9  | 20 |
| -CNAN | 0.044361 | 1 | 9  | 19 |
| -CNEY | 0.044361 | 1 | 9  | 9  |
| -CNIK | 0.044361 | 1 | 9  | 8  |
| -CNNS | 0.044361 | 2 | 18 | 41 |
| -CNRD | 0.044361 | 2 | 18 | 19 |
| -CNSP | 0.044361 | 1 | 9  | 31 |
| -CNSW | 0.044361 | 1 | 9  | 27 |
| -CNTC | 0.044361 | 1 | 9  | 23 |
| -CNTT | 0.044361 | 1 | 9  | 24 |
| -CPCY | 0.044361 | 1 | 9  | 7  |
| -CPEC | 0.044361 | 1 | 9  | 4  |
| -CPMV | 0.044361 | 1 | 9  | 36 |
| -CPQY | 0.044361 | 1 | 9  | 7  |
| -CPTW | 0.044361 | 1 | 9  | 26 |
| -CPTY | 0.044361 | 1 | 9  | 12 |
| -CPYG | 0.044361 | 1 | 9  | 13 |
| -CQGL | 0.044361 | 1 | 9  | 16 |
| -CQMI | 0.044361 | 1 | 9  | 9  |
| -CQNH | 0.044361 | 1 | 9  | 19 |
| -CRDC | 0.044361 | 1 | 9  | 22 |
| -CREY | 0.044361 | 1 | 9  | 17 |
| -CRKM | 0.044361 | 1 | 9  | 17 |
| -CRKT | 0.044361 | 2 | 18 | 44 |
| -CRMG | 0.044361 | 1 | 9  | 40 |
| -CRPP | 0.044361 | 1 | 9  | 39 |
| -CRQR | 0.044361 | 1 | 9  | 47 |
| -CRTV | 0.044361 | 2 | 18 | 44 |
| -CRVI | 0.044361 | 1 | 9  | 40 |
| -CSAR | 0.044361 | 2 | 18 | 79 |
| -CSDW | 0.044361 | 1 | 9  | 13 |
| -CSGH | 0.044361 | 1 | 9  | 25 |
| -CSHS | 0.044361 | 2 | 18 | 46 |
| -CSKF | 0.044361 | 1 | 9  | 17 |
| -CSKW | 0.044361 | 1 | 9  | 26 |
| -CSLD | 0.044361 | 2 | 18 | 47 |
| -CSLY | 0.044361 | 1 | 9  | 30 |
| -CSPH | 0.044361 | 1 | 9  | 19 |
| -CSPY | 0.044361 | 1 | 9  | 31 |
| -CSTY | 0.044361 | 1 | 9  | 35 |
| -CSVG | 0.044361 | 2 | 18 | 36 |
| -CSWT | 0.044361 | 1 | 9  | 24 |
| -CSYY | 0.044361 | 1 | 9  | 41 |
| -CTED | 0.044361 | 2 | 18 | 29 |
| -CTGG | 0.044361 | 1 | 9  | 19 |
| -CTKT | 0.044361 | 1 | 9  | 25 |
| -CTPK | 0.044361 | 1 | 9  | 23 |
| -CTRI | 0.044361 | 1 | 9  | 31 |
| -CTTD | 0.044361 | 1 | 9  | 12 |
| -CTTL | 0.044361 | 2 | 18 | 83 |
| -CTTW | 0.044361 | 1 | 9  | 39 |
| -CTVK | 0.044361 | 2 | 18 | 24 |
| -CVEE | 0.044361 | 1 | 9  | 16 |

|       |          |   |    |    |
|-------|----------|---|----|----|
| -CVGG | 0.044361 | 1 | 9  | 28 |
| -CVKC | 0.044361 | 1 | 9  | 12 |
| -CVNC | 0.044361 | 1 | 9  | 14 |
| -CVNF | 0.044361 | 1 | 9  | 11 |
| -CVQI | 0.044361 | 1 | 9  | 12 |
| -CVYV | 0.044361 | 1 | 9  | 17 |
| -CWSG | 0.044361 | 1 | 9  | 18 |
| -CYAA | 0.044361 | 1 | 9  | 13 |
| -CYDQ | 0.044361 | 1 | 9  | 11 |
| -CYES | 0.044361 | 1 | 9  | 25 |
| -CYGL | 0.044361 | 1 | 9  | 31 |
| -CYGV | 0.044361 | 1 | 9  | 18 |
| -CYRG | 0.044361 | 1 | 9  | 14 |
| -CYVK | 0.044361 | 1 | 9  | 38 |
| -CFSS | 0.044361 | 3 | 27 | 37 |
| -CKAL | 0.044361 | 3 | 27 | 38 |
| -CNGS | 0.044361 | 3 | 27 | 43 |
| -CRRD | 0.044361 | 3 | 27 | 46 |
| -CRSR | 0.044361 | 3 | 27 | 77 |
| -CSET | 0.044361 | 3 | 27 | 52 |
| -CDLR | 0.045369 | 5 | 44 | 54 |
| -CSDS | 0.045628 | 4 | 35 | 54 |
| -CARS | 0.046067 | 3 | 26 | 78 |
| -CDGL | 0.046067 | 3 | 26 | 46 |
| -CESL | 0.046067 | 3 | 26 | 42 |
| -CLSA | 0.046067 | 3 | 26 | 97 |
| -CRTS | 0.046067 | 3 | 26 | 71 |
| -CTRS | 0.046424 | 5 | 43 | 94 |
| -CAKV | 0.04697  | 2 | 17 | 39 |
| -CATV | 0.04697  | 2 | 17 | 57 |
| -CDEL | 0.04697  | 2 | 17 | 24 |
| -CDFN | 0.04697  | 2 | 17 | 21 |
| -CDGM | 0.04697  | 2 | 17 | 22 |
| -CDST | 0.04697  | 2 | 17 | 42 |
| -CDTL | 0.04697  | 4 | 34 | 46 |
| -CESH | 0.04697  | 2 | 17 | 32 |
| -CGLA | 0.04697  | 2 | 17 | 51 |
| -CGSE | 0.04697  | 2 | 17 | 24 |
| -CGSR | 0.04697  | 4 | 34 | 50 |
| -CITR | 0.04697  | 2 | 17 | 74 |
| -CKLG | 0.04697  | 2 | 17 | 33 |
| -CKVT | 0.04697  | 2 | 17 | 24 |
| -CLEL | 0.04697  | 2 | 17 | 37 |
| -CLFE | 0.04697  | 2 | 17 | 31 |
| -CLRT | 0.04697  | 2 | 17 | 70 |
| -CPKV | 0.04697  | 2 | 17 | 27 |
| -CPVK | 0.04697  | 2 | 17 | 26 |
| -CRFE | 0.04697  | 2 | 17 | 35 |
| -CRSP | 0.04697  | 2 | 17 | 56 |
| -CSCT | 0.04697  | 2 | 17 | 43 |
| -CTAP | 0.04697  | 2 | 17 | 41 |
| -CTKA | 0.04697  | 2 | 17 | 22 |
| -CTTK | 0.04697  | 2 | 17 | 14 |
| -CVKR | 0.04697  | 2 | 17 | 40 |
| -CYAS | 0.04697  | 2 | 17 | 38 |
| -CYGS | 0.04697  | 2 | 17 | 41 |
| -CYNV | 0.04697  | 2 | 17 | 16 |



|       |          |   |    |    |
|-------|----------|---|----|----|
| -CPRT | 0.047909 | 3 | 25 | 65 |
| -CRDR | 0.047909 | 3 | 25 | 43 |
| -CVLR | 0.048688 | 5 | 41 | 83 |
| -CAKL | 0.049906 | 2 | 16 | 34 |
| -CALG | 0.049906 | 1 | 8  | 37 |
| -CAMP | 0.049906 | 2 | 16 | 20 |
| -CAYL | 0.049906 | 1 | 8  | 37 |
| -CCDM | 0.049906 | 1 | 8  | 2  |
| -CCGL | 0.049906 | 1 | 8  | 35 |
| -CCKG | 0.049906 | 1 | 8  | 13 |
| -CCQA | 0.049906 | 1 | 8  | 12 |
| -CCST | 0.049906 | 1 | 8  | 35 |
| -CCTG | 0.049906 | 1 | 8  | 26 |
| -CDAL | 0.049906 | 3 | 24 | 30 |
| -CDGK | 0.049906 | 1 | 8  | 19 |
| -CDKH | 0.049906 | 1 | 8  | 5  |
| -CDLY | 0.049906 | 1 | 8  | 33 |
| -CDMS | 0.049906 | 2 | 16 | 25 |
| -CDNE | 0.049906 | 1 | 8  | 16 |
| -CDQG | 0.049906 | 1 | 8  | 16 |
| -CDQT | 0.049906 | 1 | 8  | 11 |
| -CDRE | 0.049906 | 1 | 8  | 18 |
| -CDRN | 0.049906 | 1 | 8  | 19 |
| -CDSI | 0.049906 | 2 | 16 | 39 |
| -CDTE | 0.049906 | 1 | 8  | 12 |
| -CDYM | 0.049906 | 1 | 8  | 20 |
| -CDYQ | 0.049906 | 1 | 8  | 6  |
| -CEAS | 0.049906 | 1 | 8  | 27 |
| -CECE | 0.049906 | 1 | 8  | 15 |
| -CEFG | 0.049906 | 1 | 8  | 11 |
| -CEGD | 0.049906 | 2 | 16 | 3  |
| -CEGQ | 0.049906 | 1 | 8  | 23 |
| -CEHE | 0.049906 | 1 | 8  | 13 |
| -CEHT | 0.049906 | 1 | 8  | 22 |
| -CEKP | 0.049906 | 1 | 8  | 12 |
| -CEMG | 0.049906 | 1 | 8  | 13 |
| -CENT | 0.049906 | 1 | 8  | 19 |
| -CENW | 0.049906 | 1 | 8  | 16 |
| -CEPV | 0.049906 | 1 | 8  | 25 |
| -CERA | 0.049906 | 1 | 8  | 29 |
| -CERE | 0.049906 | 1 | 8  | 22 |
| -CERP | 0.049906 | 1 | 8  | 22 |
| -CESR | 0.049906 | 4 | 32 | 39 |
| -CFAC | 0.049906 | 1 | 8  | 25 |
| -CFAP | 0.049906 | 1 | 8  | 10 |
| -CFEV | 0.049906 | 1 | 8  | 11 |
| -CFFR | 0.049906 | 1 | 8  | 11 |
| -CFGL | 0.049906 | 1 | 8  | 28 |
| -CFHQ | 0.049906 | 1 | 8  | 12 |
| -CFMT | 0.049906 | 1 | 8  | 14 |
| -CFND | 0.049906 | 1 | 8  | 11 |
| -CFRS | 0.049906 | 1 | 8  | 44 |
| -CFSC | 0.049906 | 1 | 8  | 16 |
| -CFSI | 0.049906 | 1 | 8  | 12 |
| -CGAF | 0.049906 | 1 | 8  | 16 |
| -CGAV | 0.049906 | 1 | 8  | 55 |
| -CGCA | 0.049906 | 1 | 8  | 10 |

|       |          |   |    |    |
|-------|----------|---|----|----|
| -CGGR | 0.049906 | 1 | 8  | 33 |
| -CGHC | 0.049906 | 1 | 8  | 12 |
| -CGKG | 0.049906 | 1 | 8  | 15 |
| -CGMA | 0.049906 | 1 | 8  | 18 |
| -CGMT | 0.049906 | 1 | 8  | 23 |
| -CGNN | 0.049906 | 1 | 8  | 22 |
| -CGPA | 0.049906 | 2 | 16 | 34 |
| -CGPD | 0.049906 | 1 | 8  | 12 |
| -CGQA | 0.049906 | 1 | 8  | 14 |
| -CGRN | 0.049906 | 1 | 8  | 30 |
| -CGRQ | 0.049906 | 1 | 8  | 14 |
| -CGSW | 0.049906 | 1 | 8  | 28 |
| -CGSY | 0.049906 | 1 | 8  | 21 |
| -CGTI | 0.049906 | 1 | 8  | 33 |
| -CGTS | 0.049906 | 3 | 24 | 52 |
| -CGVI | 0.049906 | 1 | 8  | 25 |
| -CHCD | 0.049906 | 1 | 8  | 11 |
| -CHDT | 0.049906 | 1 | 8  | 30 |
| -CHEA | 0.049906 | 1 | 8  | 14 |
| -CHED | 0.049906 | 1 | 8  | 3  |
| -CHEN | 0.049906 | 1 | 8  | 16 |
| -CHKG | 0.049906 | 1 | 8  | 13 |
| -CHKS | 0.049906 | 1 | 8  | 31 |
| -CHLR | 0.049906 | 1 | 8  | 75 |
| -CHMR | 0.049906 | 1 | 8  | 12 |
| -CHPT | 0.049906 | 1 | 8  | 10 |
| -CHRN | 0.049906 | 1 | 8  | 9  |
| -CHTN | 0.049906 | 1 | 8  | 22 |
| -CIAR | 0.049906 | 2 | 16 | 33 |
| -CIDT | 0.049906 | 1 | 8  | 15 |
| -CIEK | 0.049906 | 2 | 16 | 26 |
| -CIHG | 0.049906 | 1 | 8  | 17 |
| -CIPD | 0.049906 | 1 | 8  | 10 |
| -CIRC | 0.049906 | 1 | 8  | 8  |
| -CIST | 0.049906 | 2 | 16 | 21 |
| -CKCD | 0.049906 | 1 | 8  | 18 |
| -CKCK | 0.049906 | 1 | 8  | 19 |
| -CKDN | 0.049906 | 1 | 8  | 10 |
| -CKEC | 0.049906 | 1 | 8  | 10 |
| -CKEE | 0.049906 | 1 | 8  | 5  |
| -CKEL | 0.049906 | 1 | 8  | 27 |
| -CKEV | 0.049906 | 1 | 8  | 10 |
| -CKGL | 0.049906 | 2 | 16 | 22 |
| -CKHN | 0.049906 | 1 | 8  | 22 |
| -CKKS | 0.049906 | 1 | 8  | 20 |
| -CKLN | 0.049906 | 2 | 16 | 36 |
| -CKMD | 0.049906 | 1 | 8  | 10 |
| -CKNE | 0.049906 | 1 | 8  | 20 |
| -CKSR | 0.049906 | 2 | 16 | 62 |
| -CLAS | 0.049906 | 3 | 24 | 70 |
| -CLCE | 0.049906 | 1 | 8  | 21 |
| -CLCG | 0.049906 | 1 | 8  | 22 |
| -CLEE | 0.049906 | 2 | 16 | 23 |
| -CLGF | 0.049906 | 1 | 8  | 34 |
| -CLGY | 0.049906 | 1 | 8  | 15 |
| -CLHA | 0.049906 | 1 | 8  | 51 |
| -CLKP | 0.049906 | 1 | 8  | 28 |

|       |          |   |    |    |
|-------|----------|---|----|----|
| -CLKQ | 0.049906 | 1 | 8  | 13 |
| -CLLY | 0.049906 | 1 | 8  | 44 |
| -CLNF | 0.049906 | 1 | 8  | 23 |
| -CLPY | 0.049906 | 1 | 8  | 21 |
| -CLQD | 0.049906 | 2 | 16 | 19 |
| -CLYN | 0.049906 | 1 | 8  | 24 |
| -CMAR | 0.049906 | 1 | 8  | 22 |
| -CMCG | 0.049906 | 1 | 8  | 23 |
| -CMKI | 0.049906 | 1 | 8  | 14 |
| -CMLR | 0.049906 | 1 | 8  | 60 |
| -CMNK | 0.049906 | 1 | 8  | 11 |
| -CMPT | 0.049906 | 1 | 8  | 28 |
| -CMRC | 0.049906 | 1 | 8  | 17 |
| -CMSD | 0.049906 | 1 | 8  | 14 |
| -CMSR | 0.049906 | 1 | 8  | 31 |
| -CMSS | 0.049906 | 2 | 16 | 34 |
| -CNFG | 0.049906 | 1 | 8  | 16 |
| -CNFR | 0.049906 | 1 | 8  | 20 |
| -CNGF | 0.049906 | 1 | 8  | 15 |
| -CNHK | 0.049906 | 1 | 8  | 20 |
| -CNKC | 0.049906 | 1 | 8  | 12 |
| -CNKH | 0.049906 | 1 | 8  | 9  |
| -CNNT | 0.049906 | 1 | 8  | 26 |
| -CNRP | 0.049906 | 2 | 16 | 20 |
| -CNSC | 0.049906 | 1 | 8  | 24 |
| -CNSL | 0.049906 | 3 | 24 | 63 |
| -CNTA | 0.049906 | 1 | 8  | 13 |
| -CNVD | 0.049906 | 1 | 8  | 16 |
| -CNYE | 0.049906 | 1 | 8  | 25 |
| -CNYG | 0.049906 | 1 | 8  | 10 |
| -CPAI | 0.049906 | 1 | 8  | 20 |
| -CPCI | 0.049906 | 1 | 8  | 17 |
| -CPDI | 0.049906 | 1 | 8  | 9  |
| -CPDL | 0.049906 | 1 | 8  | 35 |
| -CPDQ | 0.049906 | 1 | 8  | 8  |
| -CPEK | 0.049906 | 1 | 8  | 8  |
| -CPFK | 0.049906 | 1 | 8  | 17 |
| -CPGF | 0.049906 | 1 | 8  | 26 |
| -CPKW | 0.049906 | 1 | 8  | 18 |
| -CPLE | 0.049906 | 3 | 24 | 38 |
| -CPNN | 0.049906 | 1 | 8  | 18 |
| -CPPT | 0.049906 | 1 | 8  | 27 |
| -CPQG | 0.049906 | 1 | 8  | 17 |
| -CPRI | 0.049906 | 1 | 8  | 22 |
| -CPRK | 0.049906 | 2 | 16 | 34 |
| -CPSV | 0.049906 | 3 | 24 | 61 |
| -CPTK | 0.049906 | 1 | 8  | 22 |
| -CPVR | 0.049906 | 3 | 24 | 78 |
| -CQDG | 0.049906 | 1 | 8  | 8  |
| -CQGV | 0.049906 | 1 | 8  | 20 |
| -CQLY | 0.049906 | 1 | 8  | 18 |
| -CQSD | 0.049906 | 1 | 8  | 18 |
| -CQSG | 0.049906 | 1 | 8  | 16 |
| -CQTT | 0.049906 | 1 | 8  | 14 |
| -CQVE | 0.049906 | 1 | 8  | 11 |
| -CQYL | 0.049906 | 1 | 8  | 19 |
| -CRAA | 0.049906 | 1 | 8  | 22 |

|       |          |   |    |    |
|-------|----------|---|----|----|
| -CRAV | 0.049906 | 2 | 16 | 34 |
| -CRAW | 0.049906 | 1 | 8  | 49 |
| -CRDM | 0.049906 | 1 | 8  | 16 |
| -CREH | 0.049906 | 1 | 8  | 14 |
| -CRGG | 0.049906 | 1 | 8  | 18 |
| -CRGT | 0.049906 | 1 | 8  | 33 |
| -CRKE | 0.049906 | 1 | 8  | 24 |
| -CRKG | 0.049906 | 1 | 8  | 29 |
| -CRKP | 0.049906 | 1 | 8  | 38 |
| -CRLG | 0.049906 | 2 | 16 | 60 |
| -CRPI | 0.049906 | 1 | 8  | 13 |
| -CRPY | 0.049906 | 1 | 8  | 27 |
| -CRQL | 0.049906 | 1 | 8  | 36 |
| -CRQT | 0.049906 | 1 | 8  | 37 |
| -CRVK | 0.049906 | 2 | 16 | 33 |
| -CSDE | 0.049906 | 3 | 24 | 25 |
| -CSGW | 0.049906 | 1 | 8  | 28 |
| -CSLF | 0.049906 | 1 | 8  | 35 |
| -CSLP | 0.049906 | 4 | 32 | 83 |
| -CSMV | 0.049906 | 2 | 16 | 40 |
| -CSPR | 0.049906 | 2 | 16 | 73 |
| -CSQR | 0.049906 | 1 | 8  | 27 |
| -CSRF | 0.049906 | 2 | 16 | 50 |
| -CSWQ | 0.049906 | 1 | 8  | 15 |
| -CSYP | 0.049906 | 1 | 8  | 34 |
| -CSYV | 0.049906 | 3 | 24 | 34 |
| -CTAW | 0.049906 | 1 | 8  | 20 |
| -CTFT | 0.049906 | 1 | 8  | 27 |
| -CTMK | 0.049906 | 1 | 8  | 16 |
| -CTPY | 0.049906 | 1 | 8  | 16 |
| -CTQG | 0.049906 | 2 | 16 | 21 |
| -CTRG | 0.049906 | 2 | 16 | 39 |
| -CTRP | 0.049906 | 2 | 16 | 33 |
| -CTVW | 0.049906 | 1 | 8  | 25 |
| -CVAE | 0.049906 | 2 | 16 | 30 |
| -CVEC | 0.049906 | 1 | 8  | 8  |
| -CVGN | 0.049906 | 2 | 16 | 28 |
| -CVKP | 0.049906 | 2 | 16 | 33 |
| -CVKS | 0.049906 | 2 | 16 | 42 |
| -CVND | 0.049906 | 1 | 8  | 12 |
| -CVQN | 0.049906 | 1 | 8  | 16 |
| -CWDL | 0.049906 | 1 | 8  | 23 |
| -CWSE | 0.049906 | 1 | 8  | 18 |
| -CWSH | 0.049906 | 1 | 8  | 17 |
| -CYAR | 0.049906 | 1 | 8  | 30 |
| -CYDI | 0.049906 | 1 | 8  | 11 |
| -CYGN | 0.049906 | 1 | 8  | 11 |
| -CYGT | 0.049906 | 1 | 8  | 18 |
| -CYHN | 0.049906 | 1 | 8  | 15 |
| -CYNL | 0.049906 | 1 | 8  | 38 |
| -CYNS | 0.049906 | 1 | 8  | 28 |
| -CYPL | 0.049906 | 3 | 24 | 49 |
| -CYTA | 0.049906 | 1 | 8  | 22 |
| -CYTD | 0.049906 | 1 | 8  | 12 |
| -CYTN | 0.049906 | 2 | 16 | 24 |
| -CYTP | 0.049906 | 1 | 8  | 18 |
| -CYTR | 0.049906 | 2 | 16 | 52 |

|       |          |   |    |    |
|-------|----------|---|----|----|
| -CPSS | 0.051754 | 7 | 54 | 82 |
| -CHSI | 0.052076 | 3 | 23 | 16 |
| -CKLT | 0.052076 | 3 | 23 | 57 |
| -CLGQ | 0.052076 | 3 | 23 | 31 |
| -CLPN | 0.052076 | 3 | 23 | 44 |
| -CPSM | 0.052076 | 3 | 23 | 32 |
| -CRPS | 0.052076 | 3 | 23 | 65 |
| -CSSK | 0.052076 | 3 | 23 | 64 |
| -CADG | 0.053233 | 2 | 15 | 25 |
| -CARK | 0.053233 | 2 | 15 | 50 |
| -CDGP | 0.053233 | 2 | 15 | 26 |
| -CDRM | 0.053233 | 2 | 15 | 17 |
| -CDVN | 0.053233 | 2 | 15 | 22 |
| -CGEL | 0.053233 | 2 | 15 | 18 |
| -CGLG | 0.053233 | 2 | 15 | 39 |
| -CGVV | 0.053233 | 2 | 15 | 47 |
| -CHEE | 0.053233 | 2 | 15 | 13 |
| -CKLR | 0.053233 | 2 | 15 | 71 |
| -CKSC | 0.053233 | 2 | 15 | 20 |
| -CLDV | 0.053233 | 2 | 15 | 31 |
| -CLHG | 0.053233 | 2 | 15 | 49 |
| -CLLD | 0.053233 | 2 | 15 | 50 |
| -CLSM | 0.053233 | 2 | 15 | 70 |
| -CMIG | 0.053233 | 2 | 15 | 17 |
| -CNAL | 0.053233 | 2 | 15 | 22 |
| -CNLP | 0.053233 | 2 | 15 | 48 |
| -CNNV | 0.053233 | 2 | 15 | 19 |
| -CPKR | 0.053233 | 2 | 15 | 30 |
| -CRDY | 0.053233 | 2 | 15 | 27 |
| -CRER | 0.053233 | 2 | 15 | 46 |
| -CSAC | 0.053233 | 2 | 15 | 27 |
| -CSPD | 0.053233 | 2 | 15 | 26 |
| -CTDL | 0.053233 | 4 | 30 | 54 |
| -CTEP | 0.053233 | 2 | 15 | 31 |
| -CTFK | 0.053233 | 2 | 15 | 21 |
| -CTHK | 0.053233 | 2 | 15 | 18 |
| -CTKR | 0.053233 | 2 | 15 | 41 |
| -CTNN | 0.053233 | 2 | 15 | 40 |
| -CVGE | 0.053233 | 2 | 15 | 21 |
| -CVNV | 0.053233 | 2 | 15 | 24 |
| -CWDS | 0.053233 | 2 | 15 | 21 |
| -CWSV | 0.053233 | 2 | 15 | 53 |
| -CVDS | 0.053952 | 5 | 37 | 38 |
| -CAKK | 0.054443 | 3 | 22 | 36 |
| -CEGS | 0.054443 | 3 | 22 | 17 |
| -CGTL | 0.054443 | 3 | 22 | 69 |
| -CLRR | 0.054443 | 3 | 22 | 88 |
| -CNES | 0.054443 | 3 | 22 | 31 |
| -CSAN | 0.054443 | 3 | 22 | 42 |
| -CSAV | 0.054443 | 3 | 22 | 63 |
| -CSYS | 0.054443 | 3 | 22 | 59 |
| -CTSE | 0.054443 | 3 | 22 | 49 |
| -CVRS | 0.054443 | 3 | 22 | 71 |
| -CYSV | 0.054443 | 3 | 22 | 51 |
| -CDML | 0.055068 | 4 | 29 | 33 |
| -CHES | 0.055451 | 5 | 36 | 48 |
| -CAAR | 0.057035 | 1 | 7  | 25 |

|       |          |   |    |    |
|-------|----------|---|----|----|
| -CAFG | 0.057035 | 1 | 7  | 11 |
| -CAFH | 0.057035 | 1 | 7  | 20 |
| -CAFV | 0.057035 | 1 | 7  | 27 |
| -CAKY | 0.057035 | 1 | 7  | 20 |
| -CANA | 0.057035 | 1 | 7  | 21 |
| -CANY | 0.057035 | 1 | 7  | 9  |
| -CAQY | 0.057035 | 1 | 7  | 17 |
| -CARV | 0.057035 | 2 | 14 | 53 |
| -CASH | 0.057035 | 1 | 7  | 30 |
| -CATY | 0.057035 | 1 | 7  | 24 |
| -CAVK | 0.057035 | 1 | 7  | 35 |
| -CCEV | 0.057035 | 1 | 7  | 12 |
| -CCSK | 0.057035 | 1 | 7  | 19 |
| -CCSY | 0.057035 | 1 | 7  | 18 |
| -CCVY | 0.057035 | 1 | 7  | 11 |
| -CCYS | 0.057035 | 1 | 7  | 21 |
| -CDDS | 0.057035 | 2 | 14 | 35 |
| -CDGF | 0.057035 | 1 | 7  | 18 |
| -CDHS | 0.057035 | 1 | 7  | 28 |
| -CDKA | 0.057035 | 1 | 7  | 21 |
| -CDKV | 0.057035 | 1 | 7  | 12 |
| -CDNW | 0.057035 | 1 | 7  | 12 |
| -CDPL | 0.057035 | 4 | 28 | 37 |
| -CDQR | 0.057035 | 1 | 7  | 19 |
| -CDQS | 0.057035 | 2 | 14 | 12 |
| -CDQV | 0.057035 | 1 | 7  | 11 |
| -CDRY | 0.057035 | 1 | 7  | 8  |
| -CDSW | 0.057035 | 1 | 7  | 19 |
| -CDTI | 0.057035 | 1 | 7  | 31 |
| -CDTQ | 0.057035 | 1 | 7  | 10 |
| -CDWL | 0.057035 | 1 | 7  | 18 |
| -CDYG | 0.057035 | 1 | 7  | 15 |
| -CEAG | 0.057035 | 1 | 7  | 6  |
| -CECD | 0.057035 | 1 | 7  | 9  |
| -CEDV | 0.057035 | 1 | 7  | 23 |
| -CEEP | 0.057035 | 1 | 7  | 15 |
| -CEKE | 0.057035 | 1 | 7  | 7  |
| -CEKM | 0.057035 | 1 | 7  | 13 |
| -CENN | 0.057035 | 1 | 7  | 9  |
| -CEPS | 0.057035 | 1 | 7  | 19 |
| -CESQ | 0.057035 | 1 | 7  | 14 |
| -CETR | 0.057035 | 1 | 7  | 16 |
| -CEVP | 0.057035 | 2 | 14 | 46 |
| -CEWG | 0.057035 | 1 | 7  | 8  |
| -CFCE | 0.057035 | 1 | 7  | 8  |
| -CFCV | 0.057035 | 1 | 7  | 17 |
| -CFDS | 0.057035 | 1 | 7  | 12 |
| -CFHG | 0.057035 | 1 | 7  | 10 |
| -CFID | 0.057035 | 1 | 7  | 10 |
| -CFPI | 0.057035 | 1 | 7  | 27 |
| -CFPV | 0.057035 | 1 | 7  | 16 |
| -CFRR | 0.057035 | 1 | 7  | 44 |
| -CFSP | 0.057035 | 1 | 7  | 26 |
| -CFYR | 0.057035 | 1 | 7  | 23 |
| -CFYV | 0.057035 | 1 | 7  | 20 |
| -CGAW | 0.057035 | 1 | 7  | 28 |
| -CGDL | 0.057035 | 2 | 14 | 30 |

|       |          |   |    |    |
|-------|----------|---|----|----|
| -CGDV | 0.057035 | 1 | 7  | 11 |
| -CGER | 0.057035 | 1 | 7  | 19 |
| -CGFT | 0.057035 | 1 | 7  | 15 |
| -CGGT | 0.057035 | 2 | 14 | 24 |
| -CGKC | 0.057035 | 2 | 14 | 12 |
| -CGLC | 0.057035 | 1 | 7  | 35 |
| -CGNM | 0.057035 | 2 | 14 | 28 |
| -CGPC | 0.057035 | 1 | 7  | 14 |
| -CGTA | 0.057035 | 2 | 14 | 18 |
| -CGYE | 0.057035 | 1 | 7  | 16 |
| -CGYL | 0.057035 | 1 | 7  | 35 |
| -CHAE | 0.057035 | 1 | 7  | 12 |
| -CHCL | 0.057035 | 1 | 7  | 28 |
| -CHEL | 0.057035 | 1 | 7  | 24 |
| -CHFG | 0.057035 | 1 | 7  | 12 |
| -CHGT | 0.057035 | 2 | 14 | 22 |
| -CHPR | 0.057035 | 1 | 7  | 21 |
| -CHQV | 0.057035 | 1 | 7  | 19 |
| -CHSD | 0.057035 | 1 | 7  | 22 |
| -CHTL | 0.057035 | 2 | 14 | 36 |
| -CHTT | 0.057035 | 1 | 7  | 47 |
| -CHVK | 0.057035 | 1 | 7  | 11 |
| -CIEP | 0.057035 | 1 | 7  | 18 |
| -CIHN | 0.057035 | 1 | 7  | 6  |
| -CIKL | 0.057035 | 1 | 7  | 19 |
| -CINT | 0.057035 | 1 | 7  | 19 |
| -CIPK | 0.057035 | 1 | 7  | 22 |
| -CIQA | 0.057035 | 1 | 7  | 3  |
| -CIQG | 0.057035 | 2 | 14 | 19 |
| -CISY | 0.057035 | 1 | 7  | 14 |
| -CITA | 0.057035 | 1 | 7  | 27 |
| -CITP | 0.057035 | 1 | 7  | 23 |
| -CIYR | 0.057035 | 1 | 7  | 27 |
| -CKDI | 0.057035 | 1 | 7  | 16 |
| -CKGV | 0.057035 | 2 | 14 | 24 |
| -CKIR | 0.057035 | 1 | 7  | 23 |
| -CKKF | 0.057035 | 1 | 7  | 9  |
| -CKKR | 0.057035 | 1 | 7  | 12 |
| -CKPE | 0.057035 | 1 | 7  | 6  |
| -CKPY | 0.057035 | 1 | 7  | 14 |
| -CKQF | 0.057035 | 1 | 7  | 9  |
| -CKQL | 0.057035 | 1 | 7  | 12 |
| -CKRF | 0.057035 | 1 | 7  | 13 |
| -CKRI | 0.057035 | 1 | 7  | 16 |
| -CKSP | 0.057035 | 1 | 7  | 19 |
| -CKVY | 0.057035 | 1 | 7  | 11 |
| -CLEF | 0.057035 | 1 | 7  | 16 |
| -CLEQ | 0.057035 | 1 | 7  | 11 |
| -CLFK | 0.057035 | 1 | 7  | 12 |
| -CLFN | 0.057035 | 1 | 7  | 22 |
| -CLKF | 0.057035 | 1 | 7  | 26 |
| -CLKY | 0.057035 | 1 | 7  | 14 |
| -CLQI | 0.057035 | 1 | 7  | 25 |
| -CLQS | 0.057035 | 2 | 14 | 48 |
| -CLQY | 0.057035 | 1 | 7  | 24 |
| -CLRF | 0.057035 | 1 | 7  | 31 |
| -CLSQ | 0.057035 | 2 | 14 | 51 |

|       |          |   |    |    |
|-------|----------|---|----|----|
| -CMCP | 0.057035 | 1 | 7  | 16 |
| -CMDS | 0.057035 | 2 | 14 | 16 |
| -CMFT | 0.057035 | 1 | 7  | 18 |
| -CMGA | 0.057035 | 1 | 7  | 14 |
| -CMLI | 0.057035 | 1 | 7  | 22 |
| -CMPR | 0.057035 | 1 | 7  | 32 |
| -CMSG | 0.057035 | 1 | 7  | 12 |
| -CMTT | 0.057035 | 2 | 14 | 21 |
| -CMVG | 0.057035 | 1 | 7  | 9  |
| -CNAI | 0.057035 | 1 | 7  | 12 |
| -CNAV | 0.057035 | 1 | 7  | 24 |
| -CNDG | 0.057035 | 1 | 7  | 16 |
| -CNEK | 0.057035 | 1 | 7  | 21 |
| -CNGA | 0.057035 | 1 | 7  | 6  |
| -CNGP | 0.057035 | 1 | 7  | 20 |
| -CNGT | 0.057035 | 1 | 7  | 34 |
| -CNHF | 0.057035 | 1 | 7  | 14 |
| -CNHI | 0.057035 | 1 | 7  | 12 |
| -CNIG | 0.057035 | 1 | 7  | 16 |
| -CNLE | 0.057035 | 1 | 7  | 9  |
| -CNLV | 0.057035 | 2 | 14 | 63 |
| -CNPN | 0.057035 | 1 | 7  | 23 |
| -CNRY | 0.057035 | 1 | 7  | 32 |
| -CNSQ | 0.057035 | 1 | 7  | 23 |
| -CNWT | 0.057035 | 1 | 7  | 14 |
| -CNYS | 0.057035 | 1 | 7  | 18 |
| -CPAF | 0.057035 | 1 | 7  | 24 |
| -CPCN | 0.057035 | 1 | 7  | 18 |
| -CPEG | 0.057035 | 2 | 14 | 18 |
| -CPEM | 0.057035 | 1 | 7  | 16 |
| -CPGG | 0.057035 | 1 | 7  | 24 |
| -CPGN | 0.057035 | 1 | 7  | 17 |
| -CPHI | 0.057035 | 1 | 7  | 10 |
| -CPIE | 0.057035 | 1 | 7  | 20 |
| -CPIP | 0.057035 | 2 | 14 | 17 |
| -CPIR | 0.057035 | 2 | 14 | 36 |
| -CPKD | 0.057035 | 1 | 7  | 25 |
| -CPKK | 0.057035 | 1 | 7  | 18 |
| -CPKN | 0.057035 | 1 | 7  | 16 |
| -CPNF | 0.057035 | 1 | 7  | 13 |
| -CPNV | 0.057035 | 2 | 14 | 17 |
| -CPPH | 0.057035 | 1 | 7  | 20 |
| -CPRN | 0.057035 | 2 | 14 | 23 |
| -CPRY | 0.057035 | 1 | 7  | 50 |
| -CPSP | 0.057035 | 2 | 14 | 51 |
| -CPVE | 0.057035 | 1 | 7  | 13 |
| -CQAC | 0.057035 | 1 | 7  | 31 |
| -CQEL | 0.057035 | 1 | 7  | 8  |
| -CQGD | 0.057035 | 1 | 7  | 9  |
| -CQGP | 0.057035 | 1 | 7  | 11 |
| -CQLL | 0.057035 | 2 | 14 | 36 |
| -CQMT | 0.057035 | 1 | 7  | 10 |
| -CQNG | 0.057035 | 1 | 7  | 12 |
| -CQNS | 0.057035 | 1 | 7  | 20 |
| -CQRM | 0.057035 | 1 | 7  | 15 |
| -CQRN | 0.057035 | 1 | 7  | 23 |
| -CQRP | 0.057035 | 1 | 7  | 13 |



|       |          |   |    |    |
|-------|----------|---|----|----|
| -CQTN | 0.057035 | 1 | 7  | 20 |
| -CQTS | 0.057035 | 2 | 14 | 36 |
| -CQVG | 0.057035 | 1 | 7  | 14 |
| -CQYR | 0.057035 | 1 | 7  | 28 |
| -CRAH | 0.057035 | 1 | 7  | 20 |
| -CRDI | 0.057035 | 1 | 7  | 14 |
| -CREM | 0.057035 | 1 | 7  | 19 |
| -CREQ | 0.057035 | 1 | 7  | 11 |
| -CRFG | 0.057035 | 2 | 14 | 25 |
| -CRFL | 0.057035 | 1 | 7  | 49 |
| -CRGD | 0.057035 | 2 | 14 | 12 |
| -CRGE | 0.057035 | 1 | 7  | 22 |
| -CRHI | 0.057035 | 1 | 7  | 23 |
| -CRHT | 0.057035 | 1 | 7  | 30 |
| -CRME | 0.057035 | 1 | 7  | 11 |
| -CRPG | 0.057035 | 1 | 7  | 34 |
| -CRQD | 0.057035 | 1 | 7  | 13 |
| -CRQE | 0.057035 | 1 | 7  | 12 |
| -CRQI | 0.057035 | 1 | 7  | 24 |
| -CRSG | 0.057035 | 4 | 28 | 67 |
| -CRTY | 0.057035 | 1 | 7  | 39 |
| -CRWF | 0.057035 | 1 | 7  | 25 |
| -CRYE | 0.057035 | 1 | 7  | 14 |
| -CSAD | 0.057035 | 2 | 14 | 30 |
| -CSAI | 0.057035 | 2 | 14 | 30 |
| -CSDD | 0.057035 | 2 | 14 | 13 |
| -CSEM | 0.057035 | 1 | 7  | 12 |
| -CSFH | 0.057035 | 1 | 7  | 22 |
| -CSFK | 0.057035 | 1 | 7  | 21 |
| -CSFN | 0.057035 | 1 | 7  | 8  |
| -CSGD | 0.057035 | 2 | 14 | 28 |
| -CSHD | 0.057035 | 1 | 7  | 16 |
| -CSHN | 0.057035 | 1 | 7  | 22 |
| -CSIK | 0.057035 | 1 | 7  | 29 |
| -CSME | 0.057035 | 1 | 7  | 24 |
| -CSPW | 0.057035 | 1 | 7  | 21 |
| -CSRT | 0.057035 | 4 | 28 | 85 |
| -CTEA | 0.057035 | 1 | 7  | 3  |
| -CTET | 0.057035 | 2 | 14 | 16 |
| -CTGF | 0.057035 | 1 | 7  | 24 |
| -CTGI | 0.057035 | 1 | 7  | 24 |
| -CTHN | 0.057035 | 1 | 7  | 23 |
| -CTHW | 0.057035 | 1 | 7  | 26 |
| -CTKI | 0.057035 | 1 | 7  | 24 |
| -CTLI | 0.057035 | 1 | 7  | 46 |
| -CTNK | 0.057035 | 1 | 7  | 18 |
| -CTYG | 0.057035 | 1 | 7  | 19 |
| -CVAT | 0.057035 | 1 | 7  | 35 |
| -CVGT | 0.057035 | 2 | 14 | 33 |
| -CVNK | 0.057035 | 1 | 7  | 19 |
| -CVQT | 0.057035 | 1 | 7  | 18 |
| -CVRF | 0.057035 | 2 | 14 | 25 |
| -CVSA | 0.057035 | 2 | 14 | 19 |
| -CVSN | 0.057035 | 2 | 14 | 27 |
| -CWAT | 0.057035 | 1 | 7  | 17 |
| -CWPT | 0.057035 | 1 | 7  | 19 |
| -CWRT | 0.057035 | 1 | 7  | 31 |

|       |          |   |    |     |
|-------|----------|---|----|-----|
| -CWSR | 0.057035 | 1 | 7  | 28  |
| -CYCR | 0.057035 | 1 | 7  | 28  |
| -CYDT | 0.057035 | 1 | 7  | 16  |
| -CYGC | 0.057035 | 1 | 7  | 11  |
| -CYGI | 0.057035 | 1 | 7  | 9   |
| -CYKS | 0.057035 | 2 | 14 | 40  |
| -CYRY | 0.057035 | 1 | 7  | 31  |
| -CYSY | 0.057035 | 1 | 7  | 18  |
| -CYTI | 0.057035 | 1 | 7  | 10  |
| -CYYS | 0.057035 | 1 | 7  | 20  |
| -CDVI | 0.057035 | 3 | 21 | 33  |
| -CELD | 0.057035 | 3 | 21 | 31  |
| -CKAS | 0.057035 | 3 | 21 | 37  |
| -CLAI | 0.057035 | 3 | 21 | 34  |
| -CNKP | 0.057035 | 3 | 21 | 27  |
| -CPSG | 0.057035 | 3 | 21 | 27  |
| -CRSW | 0.057035 | 3 | 21 | 67  |
| -CRTR | 0.057035 | 3 | 21 | 111 |
| -CSNV | 0.057035 | 3 | 21 | 45  |
| -CTSI | 0.057035 | 5 | 35 | 56  |
| -CVSK | 0.057035 | 3 | 21 | 45  |
| -CSAL | 0.058223 | 7 | 48 | 77  |
| -CRRS | 0.058426 | 6 | 41 | 105 |
| -CYSS | 0.059147 | 4 | 27 | 42  |
| -CDGA | 0.059887 | 3 | 20 | 19  |
| -CEDQ | 0.059887 | 3 | 20 | 11  |
| -CERL | 0.059887 | 3 | 20 | 28  |
| -CKVP | 0.059887 | 3 | 20 | 25  |
| -CNKR | 0.059887 | 3 | 20 | 32  |
| -CSKT | 0.059887 | 3 | 20 | 40  |
| -CSRR | 0.059887 | 3 | 20 | 96  |
| -CTRV | 0.059887 | 3 | 20 | 64  |
| -CTSP | 0.059887 | 6 | 40 | 43  |
| -CVGK | 0.059887 | 3 | 20 | 18  |
| -CSLV | 0.060492 | 5 | 33 | 72  |
| -CLPR | 0.060755 | 7 | 46 | 72  |
| -CSLT | 0.061422 | 6 | 39 | 92  |
| -CAET | 0.061422 | 2 | 13 | 28  |
| -CAYT | 0.061422 | 2 | 13 | 27  |
| -CCPS | 0.061422 | 2 | 13 | 23  |
| -CDDR | 0.061422 | 2 | 13 | 31  |
| -CDLT | 0.061422 | 4 | 26 | 37  |
| -CDRG | 0.061422 | 2 | 13 | 20  |
| -CDTG | 0.061422 | 2 | 13 | 34  |
| -CDWN | 0.061422 | 2 | 13 | 16  |
| -CEMR | 0.061422 | 2 | 13 | 17  |
| -CERN | 0.061422 | 2 | 13 | 29  |
| -CGIE | 0.061422 | 2 | 13 | 30  |
| -CGQE | 0.061422 | 2 | 13 | 13  |
| -CGTP | 0.061422 | 2 | 13 | 38  |
| -CHAL | 0.061422 | 2 | 13 | 64  |
| -CHLV | 0.061422 | 2 | 13 | 34  |
| -CHSL | 0.061422 | 2 | 13 | 63  |
| -CKAT | 0.061422 | 2 | 13 | 15  |
| -CKRL | 0.061422 | 2 | 13 | 39  |
| -CKSM | 0.061422 | 2 | 13 | 21  |
| -CKST | 0.061422 | 2 | 13 | 33  |

|       |          |   |    |     |
|-------|----------|---|----|-----|
| -CLGG | 0.061422 | 2 | 13 | 40  |
| -CLKH | 0.061422 | 2 | 13 | 44  |
| -CLNG | 0.061422 | 2 | 13 | 31  |
| -CLNL | 0.061422 | 4 | 26 | 60  |
| -CLSY | 0.061422 | 2 | 13 | 25  |
| -CLTL | 0.061422 | 8 | 52 | 128 |
| -CNKS | 0.061422 | 2 | 13 | 24  |
| -CNLG | 0.061422 | 2 | 13 | 36  |
| -CPDM | 0.061422 | 2 | 13 | 17  |
| -CPFD | 0.061422 | 2 | 13 | 7   |
| -CPGV | 0.061422 | 2 | 13 | 49  |
| -CPKS | 0.061422 | 2 | 13 | 35  |
| -CPNI | 0.061422 | 2 | 13 | 18  |
| -CPRD | 0.061422 | 2 | 13 | 23  |
| -CPSN | 0.061422 | 2 | 13 | 33  |
| -CPYT | 0.061422 | 2 | 13 | 28  |
| -CQGS | 0.061422 | 2 | 13 | 20  |
| -CQKT | 0.061422 | 2 | 13 | 29  |
| -CQTF | 0.061422 | 2 | 13 | 16  |
| -CQTL | 0.061422 | 2 | 13 | 35  |
| -CRNG | 0.061422 | 2 | 13 | 47  |
| -CRYN | 0.061422 | 2 | 13 | 35  |
| -CSGG | 0.061422 | 2 | 13 | 37  |
| -CSMN | 0.061422 | 2 | 13 | 23  |
| -CTCD | 0.061422 | 2 | 13 | 14  |
| -CTFE | 0.061422 | 4 | 26 | 27  |
| -CTLL | 0.061422 | 2 | 13 | 102 |
| -CTNR | 0.061422 | 4 | 26 | 54  |
| -CTTC | 0.061422 | 2 | 13 | 39  |
| -CTWT | 0.061422 | 2 | 13 | 39  |
| -CVRK | 0.061422 | 2 | 13 | 36  |
| -CVTR | 0.061422 | 2 | 13 | 30  |
| -CDSL | 0.063039 | 3 | 19 | 58  |
| -CEYD | 0.063039 | 3 | 19 | 10  |
| -CLHE | 0.063039 | 3 | 19 | 39  |
| -CLHS | 0.063039 | 3 | 19 | 66  |
| -CNDR | 0.063039 | 3 | 19 | 25  |
| -CPLP | 0.063039 | 3 | 19 | 59  |
| -CPSA | 0.063039 | 3 | 19 | 37  |
| -CRLN | 0.063039 | 3 | 19 | 52  |
| -CTTA | 0.063039 | 3 | 19 | 21  |
| -CVAR | 0.063039 | 3 | 19 | 59  |
| -CVNS | 0.063039 | 3 | 19 | 59  |
| -CEDS | 0.063879 | 4 | 25 | 28  |
| -CEVL | 0.063879 | 4 | 25 | 58  |
| -CPPS | 0.063879 | 4 | 25 | 47  |
| -CRVL | 0.063879 | 4 | 25 | 95  |
| -CSTG | 0.063879 | 4 | 25 | 56  |
| -CVSV | 0.063879 | 4 | 25 | 69  |
| -CLPT | 0.064743 | 6 | 37 | 63  |
| -CAAE | 0.066541 | 1 | 6  | 19  |
| -CADE | 0.066541 | 1 | 6  | 21  |
| -CADF | 0.066541 | 1 | 6  | 22  |
| -CADW | 0.066541 | 1 | 6  | 6   |
| -CAEF | 0.066541 | 1 | 6  | 17  |
| -CAEQ | 0.066541 | 1 | 6  | 7   |
| -CAGI | 0.066541 | 1 | 6  | 17  |

|       |          |   |    |    |
|-------|----------|---|----|----|
| -CAGR | 0.066541 | 1 | 6  | 33 |
| -CAHG | 0.066541 | 1 | 6  | 15 |
| -CAHP | 0.066541 | 1 | 6  | 32 |
| -CAHV | 0.066541 | 1 | 6  | 21 |
| -CAKR | 0.066541 | 2 | 12 | 30 |
| -CANL | 0.066541 | 1 | 6  | 28 |
| -CATP | 0.066541 | 1 | 6  | 28 |
| -CATR | 0.066541 | 2 | 12 | 43 |
| -CAVD | 0.066541 | 1 | 6  | 29 |
| -CAYR | 0.066541 | 1 | 6  | 29 |
| -CCAD | 0.066541 | 1 | 6  | 15 |
| -CCAM | 0.066541 | 1 | 6  | 8  |
| -CCAV | 0.066541 | 1 | 6  | 29 |
| -CCED | 0.066541 | 2 | 12 | 8  |
| -CCEL | 0.066541 | 1 | 6  | 15 |
| -CCEP | 0.066541 | 1 | 6  | 9  |
| -CCET | 0.066541 | 1 | 6  | 14 |
| -CCFF | 0.066541 | 1 | 6  | 6  |
| -CCGT | 0.066541 | 1 | 6  | 26 |
| -CCKI | 0.066541 | 1 | 6  | 16 |
| -CCKM | 0.066541 | 1 | 6  | 15 |
| -CCKV | 0.066541 | 1 | 6  | 8  |
| -CCLK | 0.066541 | 1 | 6  | 6  |
| -CCNK | 0.066541 | 1 | 6  | 13 |
| -CCNN | 0.066541 | 1 | 6  | 9  |
| -CCNV | 0.066541 | 1 | 6  | 19 |
| -CCPG | 0.066541 | 1 | 6  | 13 |
| -CCPK | 0.066541 | 1 | 6  | 8  |
| -CCPR | 0.066541 | 1 | 6  | 22 |
| -CCPV | 0.066541 | 1 | 6  | 15 |
| -CCQL | 0.066541 | 1 | 6  | 21 |
| -CCRL | 0.066541 | 1 | 6  | 36 |
| -CCTI | 0.066541 | 1 | 6  | 11 |
| -CCTL | 0.066541 | 1 | 6  | 49 |
| -CCTV | 0.066541 | 1 | 6  | 33 |
| -CDAC | 0.066541 | 1 | 6  | 4  |
| -CDAE | 0.066541 | 1 | 6  | 7  |
| -CDCR | 0.066541 | 1 | 6  | 24 |
| -CDFD | 0.066541 | 1 | 6  | 12 |
| -CDHM | 0.066541 | 1 | 6  | 19 |
| -CDMH | 0.066541 | 1 | 6  | 21 |
| -CDMR | 0.066541 | 2 | 12 | 21 |
| -CDMV | 0.066541 | 1 | 6  | 18 |
| -CDMY | 0.066541 | 1 | 6  | 6  |
| -CDNQ | 0.066541 | 1 | 6  | 10 |
| -CDPP | 0.066541 | 1 | 6  | 17 |
| -CDQF | 0.066541 | 2 | 12 | 18 |
| -CDQQ | 0.066541 | 1 | 6  | 12 |
| -CDRK | 0.066541 | 2 | 12 | 30 |
| -CECV | 0.066541 | 2 | 12 | 19 |
| -CEDK | 0.066541 | 1 | 6  | 12 |
| -CEDL | 0.066541 | 1 | 6  | 15 |
| -CEED | 0.066541 | 1 | 6  | 10 |
| -CEHR | 0.066541 | 1 | 6  | 19 |
| -CELG | 0.066541 | 1 | 6  | 24 |
| -CEPQ | 0.066541 | 1 | 6  | 8  |
| -CEPR | 0.066541 | 2 | 12 | 30 |

|       |          |   |    |    |
|-------|----------|---|----|----|
| -CEPT | 0.066541 | 1 | 6  | 18 |
| -CEQW | 0.066541 | 1 | 6  | 10 |
| -CESP | 0.066541 | 1 | 6  | 24 |
| -CEST | 0.066541 | 4 | 24 | 36 |
| -CEVE | 0.066541 | 1 | 6  | 16 |
| -CEVG | 0.066541 | 1 | 6  | 20 |
| -CEYW | 0.066541 | 1 | 6  | 8  |
| -CFAK | 0.066541 | 1 | 6  | 14 |
| -CFCD | 0.066541 | 1 | 6  | 14 |
| -CFCT | 0.066541 | 1 | 6  | 15 |
| -CFCY | 0.066541 | 1 | 6  | 4  |
| -CFDN | 0.066541 | 1 | 6  | 16 |
| -CFDR | 0.066541 | 2 | 12 | 13 |
| -CFEH | 0.066541 | 1 | 6  | 11 |
| -CFEP | 0.066541 | 1 | 6  | 9  |
| -CFKA | 0.066541 | 1 | 6  | 9  |
| -CFKV | 0.066541 | 1 | 6  | 17 |
| -CFLR | 0.066541 | 2 | 12 | 41 |
| -CFMG | 0.066541 | 1 | 6  | 10 |
| -CFNG | 0.066541 | 1 | 6  | 19 |
| -CFPP | 0.066541 | 1 | 6  | 8  |
| -CFQQ | 0.066541 | 1 | 6  | 7  |
| -CFRK | 0.066541 | 1 | 6  | 12 |
| -CFRV | 0.066541 | 1 | 6  | 33 |
| -CFSE | 0.066541 | 2 | 12 | 19 |
| -CFTA | 0.066541 | 2 | 12 | 30 |
| -CFVI | 0.066541 | 1 | 6  | 6  |
| -CGAP | 0.066541 | 1 | 6  | 20 |
| -CGAR | 0.066541 | 1 | 6  | 43 |
| -CGCG | 0.066541 | 1 | 6  | 14 |
| -CGCH | 0.066541 | 1 | 6  | 10 |
| -CGDG | 0.066541 | 1 | 6  | 11 |
| -CGEH | 0.066541 | 1 | 6  | 5  |
| -CGET | 0.066541 | 1 | 6  | 27 |
| -CGFR | 0.066541 | 1 | 6  | 24 |
| -CGGN | 0.066541 | 1 | 6  | 14 |
| -CGHN | 0.066541 | 1 | 6  | 10 |
| -CGKA | 0.066541 | 1 | 6  | 7  |
| -CGKD | 0.066541 | 1 | 6  | 9  |
| -CGKI | 0.066541 | 1 | 6  | 20 |
| -CGLH | 0.066541 | 1 | 6  | 27 |
| -CGLI | 0.066541 | 2 | 12 | 44 |
| -CGLP | 0.066541 | 2 | 12 | 40 |
| -CGMK | 0.066541 | 1 | 6  | 17 |
| -CGNA | 0.066541 | 1 | 6  | 13 |
| -CGNQ | 0.066541 | 1 | 6  | 25 |
| -CGPM | 0.066541 | 1 | 6  | 30 |
| -CGRE | 0.066541 | 1 | 6  | 14 |
| -CGRH | 0.066541 | 1 | 6  | 26 |
| -CGRM | 0.066541 | 1 | 6  | 28 |
| -CGRW | 0.066541 | 1 | 6  | 29 |
| -CGSC | 0.066541 | 2 | 12 | 17 |
| -CGST | 0.066541 | 4 | 24 | 59 |
| -CGTH | 0.066541 | 1 | 6  | 11 |
| -CGTR | 0.066541 | 1 | 6  | 52 |
| -CGTW | 0.066541 | 1 | 6  | 24 |
| -CHEP | 0.066541 | 1 | 6  | 12 |

|       |          |   |    |    |
|-------|----------|---|----|----|
| -CHFC | 0.066541 | 1 | 6  | 12 |
| -CHGY | 0.066541 | 1 | 6  | 13 |
| -CHID | 0.066541 | 1 | 6  | 14 |
| -CHLE | 0.066541 | 1 | 6  | 22 |
| -CHSM | 0.066541 | 2 | 12 | 21 |
| -CHTC | 0.066541 | 1 | 6  | 15 |
| -CHTD | 0.066541 | 2 | 12 | 27 |
| -CIAL | 0.066541 | 2 | 12 | 43 |
| -CIAT | 0.066541 | 2 | 12 | 44 |
| -CIEE | 0.066541 | 1 | 6  | 11 |
| -CIGN | 0.066541 | 1 | 6  | 22 |
| -CIIK | 0.066541 | 1 | 6  | 9  |
| -CIKC | 0.066541 | 1 | 6  | 6  |
| -CILK | 0.066541 | 1 | 6  | 23 |
| -CIMK | 0.066541 | 1 | 6  | 25 |
| -CINI | 0.066541 | 1 | 6  | 8  |
| -CIQE | 0.066541 | 1 | 6  | 13 |
| -CIRE | 0.066541 | 1 | 6  | 14 |
| -CISP | 0.066541 | 1 | 6  | 14 |
| -CISV | 0.066541 | 2 | 12 | 36 |
| -CITN | 0.066541 | 1 | 6  | 17 |
| -CIWK | 0.066541 | 1 | 6  | 4  |
| -CKAD | 0.066541 | 1 | 6  | 7  |
| -CKAG | 0.066541 | 1 | 6  | 25 |
| -CKEQ | 0.066541 | 1 | 6  | 11 |
| -CKES | 0.066541 | 1 | 6  | 7  |
| -CKFK | 0.066541 | 1 | 6  | 16 |
| -CKFP | 0.066541 | 1 | 6  | 6  |
| -CKGG | 0.066541 | 1 | 6  | 18 |
| -CKGT | 0.066541 | 2 | 12 | 14 |
| -CKHW | 0.066541 | 1 | 6  | 15 |
| -CKKA | 0.066541 | 1 | 6  | 8  |
| -CKKD | 0.066541 | 1 | 6  | 7  |
| -CKKQ | 0.066541 | 1 | 6  | 5  |
| -CKKV | 0.066541 | 1 | 6  | 19 |
| -CKLW | 0.066541 | 1 | 6  | 16 |
| -CKMC | 0.066541 | 1 | 6  | 3  |
| -CKPH | 0.066541 | 1 | 6  | 4  |
| -CKPW | 0.066541 | 1 | 6  | 14 |
| -CKQD | 0.066541 | 2 | 12 | 14 |
| -CKQE | 0.066541 | 1 | 6  | 13 |
| -CKQS | 0.066541 | 1 | 6  | 8  |
| -CKSW | 0.066541 | 1 | 6  | 13 |
| -CKVE | 0.066541 | 1 | 6  | 18 |
| -CKWS | 0.066541 | 1 | 6  | 11 |
| -CKWT | 0.066541 | 1 | 6  | 18 |
| -CKYK | 0.066541 | 1 | 6  | 6  |
| -CLDD | 0.066541 | 1 | 6  | 20 |
| -CLEW | 0.066541 | 1 | 6  | 14 |
| -CLPC | 0.066541 | 2 | 12 | 27 |
| -CLPI | 0.066541 | 1 | 6  | 31 |
| -CLQE | 0.066541 | 1 | 6  | 4  |
| -CLQL | 0.066541 | 2 | 12 | 50 |
| -CLRE | 0.066541 | 2 | 12 | 30 |
| -CLRH | 0.066541 | 1 | 6  | 41 |
| -CLTA | 0.066541 | 2 | 12 | 51 |
| -CLYD | 0.066541 | 1 | 6  | 31 |

|       |          |   |    |    |
|-------|----------|---|----|----|
| -CLYK | 0.066541 | 2 | 12 | 42 |
| -CLYP | 0.066541 | 1 | 6  | 42 |
| -CLYV | 0.066541 | 1 | 6  | 32 |
| -CMAG | 0.066541 | 1 | 6  | 18 |
| -CMAQ | 0.066541 | 1 | 6  | 10 |
| -CMDK | 0.066541 | 1 | 6  | 10 |
| -CMDV | 0.066541 | 1 | 6  | 2  |
| -CMET | 0.066541 | 1 | 6  | 20 |
| -CMGK | 0.066541 | 1 | 6  | 20 |
| -CMKL | 0.066541 | 1 | 6  | 20 |
| -CMKR | 0.066541 | 1 | 6  | 13 |
| -CMKY | 0.066541 | 1 | 6  | 17 |
| -CMLD | 0.066541 | 1 | 6  | 33 |
| -CMLK | 0.066541 | 1 | 6  | 22 |
| -CMNL | 0.066541 | 2 | 12 | 32 |
| -CMPD | 0.066541 | 1 | 6  | 9  |
| -CMSM | 0.066541 | 2 | 12 | 27 |
| -CNEE | 0.066541 | 1 | 6  | 10 |
| -CNGG | 0.066541 | 2 | 12 | 17 |
| -CNGK | 0.066541 | 1 | 6  | 10 |
| -CNGM | 0.066541 | 1 | 6  | 8  |
| -CNHD | 0.066541 | 1 | 6  | 10 |
| -CNHE | 0.066541 | 2 | 12 | 18 |
| -CNHG | 0.066541 | 1 | 6  | 17 |
| -CNHV | 0.066541 | 1 | 6  | 15 |
| -CNKD | 0.066541 | 1 | 6  | 8  |
| -CNND | 0.066541 | 1 | 6  | 8  |
| -CNNH | 0.066541 | 1 | 6  | 8  |
| -CNNK | 0.066541 | 1 | 6  | 10 |
| -CNNW | 0.066541 | 1 | 6  | 19 |
| -CNPf | 0.066541 | 1 | 6  | 13 |
| -CNQR | 0.066541 | 1 | 6  | 14 |
| -CNRS | 0.066541 | 4 | 24 | 38 |
| -CNSI | 0.066541 | 2 | 12 | 17 |
| -CNTL | 0.066541 | 1 | 6  | 32 |
| -CNVG | 0.066541 | 2 | 12 | 16 |
| -CNVI | 0.066541 | 2 | 12 | 14 |
| -CNWK | 0.066541 | 1 | 6  | 16 |
| -CNWS | 0.066541 | 1 | 6  | 16 |
| -CPAR | 0.066541 | 2 | 12 | 39 |
| -CPDP | 0.066541 | 1 | 6  | 14 |
| -CPET | 0.066541 | 2 | 12 | 27 |
| -CPEV | 0.066541 | 1 | 6  | 9  |
| -CPFE | 0.066541 | 1 | 6  | 17 |
| -CPFL | 0.066541 | 1 | 6  | 35 |
| -CPFQ | 0.066541 | 1 | 6  | 5  |
| -CPHA | 0.066541 | 1 | 6  | 21 |
| -CPHL | 0.066541 | 1 | 6  | 30 |
| -CPKP | 0.066541 | 1 | 6  | 26 |
| -CPLG | 0.066541 | 4 | 24 | 63 |
| -CPLW | 0.066541 | 1 | 6  | 23 |
| -CPMP | 0.066541 | 1 | 6  | 36 |
| -CPMR | 0.066541 | 1 | 6  | 37 |
| -CPNA | 0.066541 | 1 | 6  | 17 |
| -CPNP | 0.066541 | 1 | 6  | 13 |
| -CPPG | 0.066541 | 1 | 6  | 19 |
| -CPPY | 0.066541 | 1 | 6  | 15 |

|       |          |   |    |     |
|-------|----------|---|----|-----|
| -CPQI | 0.066541 | 1 | 6  | 17  |
| -CQAR | 0.066541 | 1 | 6  | 14  |
| -CQCG | 0.066541 | 1 | 6  | 8   |
| -CQDA | 0.066541 | 2 | 12 | 18  |
| -CQFV | 0.066541 | 1 | 6  | 14  |
| -CQGA | 0.066541 | 1 | 6  | 14  |
| -CQGI | 0.066541 | 1 | 6  | 9   |
| -CQGR | 0.066541 | 1 | 6  | 18  |
| -CQGW | 0.066541 | 1 | 6  | 14  |
| -CQGY | 0.066541 | 1 | 6  | 7   |
| -CQHR | 0.066541 | 1 | 6  | 21  |
| -CQIE | 0.066541 | 1 | 6  | 12  |
| -CQKN | 0.066541 | 1 | 6  | 10  |
| -CQKR | 0.066541 | 2 | 12 | 16  |
| -CQKS | 0.066541 | 1 | 6  | 11  |
| -CQLD | 0.066541 | 1 | 6  | 12  |
| -CQLR | 0.066541 | 2 | 12 | 30  |
| -CQNE | 0.066541 | 1 | 6  | 10  |
| -CQNI | 0.066541 | 1 | 6  | 11  |
| -CQNL | 0.066541 | 1 | 6  | 19  |
| -CQNV | 0.066541 | 1 | 6  | 10  |
| -CQQL | 0.066541 | 1 | 6  | 11  |
| -CQQN | 0.066541 | 1 | 6  | 13  |
| -CQTG | 0.066541 | 1 | 6  | 19  |
| -CRAC | 0.066541 | 1 | 6  | 24  |
| -CRDE | 0.066541 | 1 | 6  | 22  |
| -CRDS | 0.066541 | 2 | 12 | 34  |
| -CREA | 0.066541 | 1 | 6  | 16  |
| -CREF | 0.066541 | 1 | 6  | 21  |
| -CRFT | 0.066541 | 1 | 6  | 26  |
| -CRKA | 0.066541 | 2 | 12 | 42  |
| -CRKF | 0.066541 | 1 | 6  | 19  |
| -CRKK | 0.066541 | 1 | 6  | 17  |
| -CRKQ | 0.066541 | 1 | 6  | 23  |
| -CRLR | 0.066541 | 4 | 24 | 142 |
| -CRLV | 0.066541 | 2 | 12 | 95  |
| -CRMA | 0.066541 | 1 | 6  | 14  |
| -CRPF | 0.066541 | 1 | 6  | 25  |
| -CRPN | 0.066541 | 1 | 6  | 32  |
| -CRQA | 0.066541 | 1 | 6  | 15  |
| -CRQS | 0.066541 | 2 | 12 | 41  |
| -CRVH | 0.066541 | 2 | 12 | 22  |
| -CRVY | 0.066541 | 1 | 6  | 29  |
| -CRWN | 0.066541 | 1 | 6  | 19  |
| -CRWP | 0.066541 | 1 | 6  | 12  |
| -CRYY | 0.066541 | 1 | 6  | 22  |
| -CSCK | 0.066541 | 1 | 6  | 20  |
| -CSFE | 0.066541 | 1 | 6  | 8   |
| -CSFP | 0.066541 | 2 | 12 | 20  |
| -CSGC | 0.066541 | 1 | 6  | 13  |
| -CSGN | 0.066541 | 2 | 12 | 31  |
| -CSHV | 0.066541 | 1 | 6  | 34  |
| -CSHY | 0.066541 | 1 | 6  | 18  |
| -CSKK | 0.066541 | 1 | 6  | 29  |
| -CSLW | 0.066541 | 1 | 6  | 62  |
| -CSNC | 0.066541 | 1 | 6  | 27  |
| -CSNK | 0.066541 | 2 | 12 | 18  |



|       |          |   |    |    |
|-------|----------|---|----|----|
| -CSPA | 0.066541 | 2 | 12 | 47 |
| -CSPC | 0.066541 | 1 | 6  | 19 |
| -CSQF | 0.066541 | 1 | 6  | 13 |
| -CSWG | 0.066541 | 1 | 6  | 17 |
| -CSYL | 0.066541 | 1 | 6  | 64 |
| -CSYT | 0.066541 | 2 | 12 | 71 |
| -CTAN | 0.066541 | 2 | 12 | 30 |
| -CTDN | 0.066541 | 1 | 6  | 19 |
| -CTHD | 0.066541 | 1 | 6  | 17 |
| -CTHV | 0.066541 | 2 | 12 | 33 |
| -CTNS | 0.066541 | 2 | 12 | 39 |
| -CTNT | 0.066541 | 2 | 12 | 32 |
| -CTPE | 0.066541 | 2 | 12 | 34 |
| -CTPG | 0.066541 | 1 | 6  | 21 |
| -CTPH | 0.066541 | 1 | 6  | 17 |
| -CTRC | 0.066541 | 2 | 12 | 28 |
| -CTRD | 0.066541 | 2 | 12 | 24 |
| -CTRF | 0.066541 | 2 | 12 | 40 |
| -CTYN | 0.066541 | 1 | 6  | 15 |
| -CVCK | 0.066541 | 1 | 6  | 13 |
| -CVDF | 0.066541 | 1 | 6  | 12 |
| -CVDW | 0.066541 | 1 | 6  | 16 |
| -CVFF | 0.066541 | 1 | 6  | 11 |
| -CVHV | 0.066541 | 1 | 6  | 24 |
| -CVKH | 0.066541 | 1 | 6  | 15 |
| -CVKK | 0.066541 | 2 | 12 | 33 |
| -CVKM | 0.066541 | 1 | 6  | 17 |
| -CVLK | 0.066541 | 4 | 24 | 33 |
| -CVQK | 0.066541 | 1 | 6  | 34 |
| -CVRQ | 0.066541 | 2 | 12 | 43 |
| -CVSD | 0.066541 | 1 | 6  | 19 |
| -CVTE | 0.066541 | 2 | 12 | 46 |
| -CVTW | 0.066541 | 1 | 6  | 36 |
| -CVYD | 0.066541 | 1 | 6  | 15 |
| -CVYK | 0.066541 | 1 | 6  | 15 |
| -CWEH | 0.066541 | 1 | 6  | 11 |
| -CWET | 0.066541 | 1 | 6  | 17 |
| -CWKG | 0.066541 | 1 | 6  | 10 |
| -CWNE | 0.066541 | 1 | 6  | 9  |
| -CWNI | 0.066541 | 1 | 6  | 4  |
| -CWRR | 0.066541 | 1 | 6  | 26 |
| -CWRS | 0.066541 | 1 | 6  | 33 |
| -CWSA | 0.066541 | 2 | 12 | 28 |
| -CWSD | 0.066541 | 1 | 6  | 9  |
| -CWSM | 0.066541 | 1 | 6  | 27 |
| -CWTA | 0.066541 | 1 | 6  | 16 |
| -CWTT | 0.066541 | 1 | 6  | 37 |
| -CYAP | 0.066541 | 2 | 12 | 14 |
| -CYDS | 0.066541 | 1 | 6  | 12 |
| -CYER | 0.066541 | 1 | 6  | 19 |
| -CYIG | 0.066541 | 2 | 12 | 24 |
| -CYKE | 0.066541 | 1 | 6  | 3  |
| -CYLD | 0.066541 | 1 | 6  | 29 |
| -CYLG | 0.066541 | 2 | 12 | 43 |
| -CYLK | 0.066541 | 1 | 6  | 48 |
| -CYMN | 0.066541 | 1 | 6  | 14 |
| -CYMT | 0.066541 | 1 | 6  | 21 |

|       |          |   |    |     |
|-------|----------|---|----|-----|
| -CYNN | 0.066541 | 1 | 6  | 12  |
| -CYQN | 0.066541 | 1 | 6  | 14  |
| -CYSG | 0.066541 | 2 | 12 | 39  |
| -CDIK | 0.066541 | 3 | 18 | 21  |
| -CGSD | 0.066541 | 3 | 18 | 29  |
| -CIGL | 0.066541 | 3 | 18 | 29  |
| -CKTR | 0.066541 | 3 | 18 | 47  |
| -CLER | 0.066541 | 3 | 18 | 39  |
| -CLRL | 0.066541 | 6 | 36 | 130 |
| -CLSR | 0.066541 | 5 | 30 | 95  |
| -CLTS | 0.066541 | 5 | 30 | 96  |
| -CNSV | 0.066541 | 3 | 18 | 62  |
| -CRYT | 0.066541 | 3 | 18 | 37  |
| -CSSI | 0.066541 | 6 | 36 | 101 |
| -CSTR | 0.066541 | 6 | 36 | 96  |
| -CSVR | 0.066541 | 6 | 36 | 68  |
| -CTLD | 0.066541 | 3 | 18 | 45  |
| -CVEL | 0.066541 | 3 | 18 | 33  |
| -CVNN | 0.066541 | 3 | 18 | 30  |
| -CYPD | 0.066541 | 3 | 18 | 32  |
| -CSRL | 0.067796 | 9 | 53 | 124 |
| -CTVR | 0.068164 | 7 | 41 | 82  |
| -CVGL | 0.068442 | 6 | 35 | 48  |
| -CDRS | 0.068835 | 5 | 29 | 64  |
| -CDEA | 0.069434 | 4 | 23 | 17  |
| -CSEL | 0.069434 | 8 | 46 | 99  |
| -CSLN | 0.069434 | 4 | 23 | 62  |
| -CSVP | 0.069434 | 4 | 23 | 63  |
| -CYVR | 0.069434 | 4 | 23 | 58  |
| -CGLR | 0.070455 | 3 | 17 | 72  |
| -CKDR | 0.070455 | 3 | 17 | 26  |
| -CKTS | 0.070455 | 3 | 17 | 50  |
| -CLLG | 0.070455 | 3 | 17 | 61  |
| -CSGV | 0.070455 | 3 | 17 | 41  |
| -CSMD | 0.070455 | 3 | 17 | 25  |
| -CSNL | 0.070455 | 3 | 17 | 61  |
| -CTDR | 0.070455 | 3 | 17 | 34  |
| -CTRR | 0.070455 | 3 | 17 | 92  |
| -CWES | 0.070455 | 3 | 17 | 22  |
| -CGSS | 0.071294 | 5 | 28 | 75  |
| -CKSL | 0.071294 | 5 | 28 | 58  |
| -CAGT | 0.07259  | 2 | 11 | 25  |
| -CAMG | 0.07259  | 2 | 11 | 23  |
| -CANS | 0.07259  | 2 | 11 | 44  |
| -CANT | 0.07259  | 2 | 11 | 21  |
| -CASD | 0.07259  | 2 | 11 | 26  |
| -CCHE | 0.07259  | 2 | 11 | 4   |
| -CCNS | 0.07259  | 2 | 11 | 22  |
| -CCVW | 0.07259  | 2 | 11 | 33  |
| -CDAR | 0.07259  | 2 | 11 | 37  |
| -CDEY | 0.07259  | 2 | 11 | 27  |
| -CDFC | 0.07259  | 2 | 11 | 24  |
| -CDMT | 0.07259  | 2 | 11 | 26  |
| -CDTV | 0.07259  | 2 | 11 | 22  |
| -CDWV | 0.07259  | 2 | 11 | 16  |
| -CDYL | 0.07259  | 2 | 11 | 15  |
| -CELR | 0.07259  | 6 | 33 | 63  |

|       |          |   |    |     |
|-------|----------|---|----|-----|
| -CERH | 0.07259  | 2 | 11 | 19  |
| -CESC | 0.07259  | 2 | 11 | 19  |
| -CESY | 0.07259  | 2 | 11 | 21  |
| -CFSM | 0.07259  | 2 | 11 | 27  |
| -CGAS | 0.07259  | 2 | 11 | 32  |
| -CGFK | 0.07259  | 2 | 11 | 12  |
| -CGGP | 0.07259  | 2 | 11 | 18  |
| -CGPL | 0.07259  | 2 | 11 | 32  |
| -CGRI | 0.07259  | 2 | 11 | 31  |
| -CGVP | 0.07259  | 2 | 11 | 38  |
| -CHGS | 0.07259  | 2 | 11 | 21  |
| -CHPA | 0.07259  | 2 | 11 | 20  |
| -CIEN | 0.07259  | 2 | 11 | 11  |
| -CKRV | 0.07259  | 2 | 11 | 28  |
| -CLCR | 0.07259  | 2 | 11 | 43  |
| -CLED | 0.07259  | 2 | 11 | 16  |
| -CLGE | 0.07259  | 2 | 11 | 30  |
| -CLKA | 0.07259  | 2 | 11 | 29  |
| -CLKI | 0.07259  | 2 | 11 | 20  |
| -CLNN | 0.07259  | 2 | 11 | 31  |
| -CMPL | 0.07259  | 2 | 11 | 41  |
| -CMTD | 0.07259  | 2 | 11 | 24  |
| -CMTG | 0.07259  | 2 | 11 | 15  |
| -CMTL | 0.07259  | 2 | 11 | 45  |
| -CMVE | 0.07259  | 2 | 11 | 14  |
| -CNLH | 0.07259  | 2 | 11 | 31  |
| -CNSM | 0.07259  | 2 | 11 | 21  |
| -CPDN | 0.07259  | 2 | 11 | 22  |
| -CPDV | 0.07259  | 2 | 11 | 18  |
| -CPHR | 0.07259  | 2 | 11 | 42  |
| -CPNL | 0.07259  | 2 | 11 | 48  |
| -CPTV | 0.07259  | 2 | 11 | 44  |
| -CPWT | 0.07259  | 2 | 11 | 15  |
| -CPYR | 0.07259  | 2 | 11 | 34  |
| -CQFR | 0.07259  | 2 | 11 | 23  |
| -CQSF | 0.07259  | 2 | 11 | 19  |
| -CRET | 0.07259  | 2 | 11 | 45  |
| -CRNS | 0.07259  | 2 | 11 | 44  |
| -CRSL | 0.07259  | 8 | 44 | 124 |
| -CSFA | 0.07259  | 2 | 11 | 25  |
| -CSTP | 0.07259  | 4 | 22 | 71  |
| -CTAK | 0.07259  | 2 | 11 | 18  |
| -CTGN | 0.07259  | 2 | 11 | 35  |
| -CTGV | 0.07259  | 2 | 11 | 31  |
| -CTQE | 0.07259  | 2 | 11 | 9   |
| -CVAC | 0.07259  | 2 | 11 | 21  |
| -CVDE | 0.07259  | 2 | 11 | 17  |
| -CVEP | 0.07259  | 2 | 11 | 27  |
| -CVGI | 0.07259  | 2 | 11 | 20  |
| -CVGP | 0.07259  | 2 | 11 | 11  |
| -CYLH | 0.07259  | 2 | 11 | 24  |
| -CYPV | 0.07259  | 2 | 11 | 22  |
| -CYRV | 0.07259  | 2 | 11 | 33  |
| -CYTV | 0.07259  | 2 | 11 | 28  |
| -CVSL | 0.073934 | 5 | 27 | 80  |
| -CDLL | 0.074278 | 8 | 43 | 101 |
| -CDRT | 0.074859 | 3 | 16 | 34  |

|       |          |   |    |     |
|-------|----------|---|----|-----|
| -CDYS | 0.074859 | 3 | 16 | 18  |
| -CFVV | 0.074859 | 3 | 16 | 28  |
| -CKSH | 0.074859 | 3 | 16 | 30  |
| -CKTL | 0.074859 | 3 | 16 | 17  |
| -CLEV | 0.074859 | 3 | 16 | 34  |
| -CLLE | 0.074859 | 3 | 16 | 39  |
| -CMVR | 0.074859 | 3 | 16 | 31  |
| -CPES | 0.074859 | 3 | 16 | 18  |
| -CPLV | 0.074859 | 3 | 16 | 66  |
| -CPSI | 0.074859 | 3 | 16 | 33  |
| -CQVR | 0.074859 | 3 | 16 | 32  |
| -CRPA | 0.074859 | 3 | 16 | 41  |
| -CSPL | 0.074859 | 3 | 16 | 57  |
| -CSYK | 0.074859 | 3 | 16 | 34  |
| -CTDT | 0.074859 | 3 | 16 | 32  |
| -CTFG | 0.074859 | 3 | 16 | 19  |
| -CTKY | 0.074859 | 3 | 16 | 11  |
| -CVTG | 0.074859 | 3 | 16 | 46  |
| -CVVP | 0.074859 | 3 | 16 | 40  |
| -CSIR | 0.075533 | 7 | 37 | 73  |
| -CSLL | 0.075533 | 7 | 37 | 150 |
| -CALT | 0.076047 | 4 | 21 | 73  |
| -CIRV | 0.076047 | 4 | 21 | 42  |
| -CRRR | 0.076047 | 4 | 21 | 94  |
| -CSQK | 0.076047 | 4 | 21 | 39  |
| -CTTE | 0.076047 | 4 | 21 | 47  |
| -CAAC | 0.079849 | 1 | 5  | 10  |
| -CAEC | 0.079849 | 1 | 5  | 7   |
| -CAEE | 0.079849 | 2 | 10 | 18  |
| -CAEK | 0.079849 | 1 | 5  | 1   |
| -CAFA | 0.079849 | 1 | 5  | 12  |
| -CAFE | 0.079849 | 1 | 5  | 15  |
| -CAFP | 0.079849 | 1 | 5  | 24  |
| -CAGA | 0.079849 | 1 | 5  | 16  |
| -CAHC | 0.079849 | 1 | 5  | 11  |
| -CAKC | 0.079849 | 1 | 5  | 9   |
| -CAKI | 0.079849 | 1 | 5  | 10  |
| -CAMD | 0.079849 | 1 | 5  | 10  |
| -CAMW | 0.079849 | 1 | 5  | 10  |
| -CANG | 0.079849 | 1 | 5  | 16  |
| -CAQF | 0.079849 | 1 | 5  | 9   |
| -CAQR | 0.079849 | 1 | 5  | 22  |
| -CARC | 0.079849 | 3 | 15 | 41  |
| -CARR | 0.079849 | 2 | 10 | 65  |
| -CASK | 0.079849 | 2 | 10 | 49  |
| -CAVR | 0.079849 | 4 | 20 | 53  |
| -CAWR | 0.079849 | 1 | 5  | 24  |
| -CAYK | 0.079849 | 1 | 5  | 19  |
| -CCAG | 0.079849 | 1 | 5  | 3   |
| -CCAK | 0.079849 | 2 | 10 | 12  |
| -CCAY | 0.079849 | 1 | 5  | 14  |
| -CCEK | 0.079849 | 1 | 5  | 19  |
| -CCER | 0.079849 | 2 | 10 | 28  |
| -CCKL | 0.079849 | 1 | 5  | 22  |
| -CCKS | 0.079849 | 1 | 5  | 25  |
| -CCNA | 0.079849 | 1 | 5  | 18  |
| -CCNL | 0.079849 | 1 | 5  | 37  |

|       |          |   |    |    |
|-------|----------|---|----|----|
| -CCPN | 0.079849 | 2 | 10 | 11 |
| -CCQK | 0.079849 | 1 | 5  | 22 |
| -CCRP | 0.079849 | 1 | 5  | 36 |
| -CCSR | 0.079849 | 2 | 10 | 28 |
| -CCVG | 0.079849 | 1 | 5  | 11 |
| -CCYE | 0.079849 | 1 | 5  | 3  |
| -CCYQ | 0.079849 | 2 | 10 | 20 |
| -CCYR | 0.079849 | 1 | 5  | 13 |
| -CDAK | 0.079849 | 1 | 5  | 11 |
| -CDCN | 0.079849 | 1 | 5  | 17 |
| -CDCP | 0.079849 | 1 | 5  | 10 |
| -CDCT | 0.079849 | 1 | 5  | 23 |
| -CDDC | 0.079849 | 1 | 5  | 6  |
| -CDDD | 0.079849 | 1 | 5  | 8  |
| -CDDI | 0.079849 | 1 | 5  | 16 |
| -CDDK | 0.079849 | 1 | 5  | 9  |
| -CDEP | 0.079849 | 1 | 5  | 6  |
| -CDER | 0.079849 | 3 | 15 | 20 |
| -CDET | 0.079849 | 1 | 5  | 17 |
| -CDEW | 0.079849 | 1 | 5  | 6  |
| -CDHD | 0.079849 | 1 | 5  | 9  |
| -CDHK | 0.079849 | 1 | 5  | 9  |
| -CDHY | 0.079849 | 1 | 5  | 15 |
| -CDKC | 0.079849 | 1 | 5  | 19 |
| -CDKM | 0.079849 | 2 | 10 | 13 |
| -CDMA | 0.079849 | 1 | 5  | 15 |
| -CDMG | 0.079849 | 1 | 5  | 16 |
| -CDPT | 0.079849 | 3 | 15 | 21 |
| -CDQI | 0.079849 | 1 | 5  | 18 |
| -CDRQ | 0.079849 | 1 | 5  | 13 |
| -CDRW | 0.079849 | 2 | 10 | 15 |
| -CDTM | 0.079849 | 1 | 5  | 17 |
| -CDWE | 0.079849 | 1 | 5  | 7  |
| -CDWM | 0.079849 | 1 | 5  | 11 |
| -CDYA | 0.079849 | 1 | 5  | 16 |
| -CDYE | 0.079849 | 1 | 5  | 14 |
| -CDYT | 0.079849 | 1 | 5  | 18 |
| -CEAD | 0.079849 | 1 | 5  | 11 |
| -CEAT | 0.079849 | 1 | 5  | 15 |
| -CECT | 0.079849 | 1 | 5  | 22 |
| -CEDG | 0.079849 | 1 | 5  | 10 |
| -CEFY | 0.079849 | 1 | 5  | 7  |
| -CEGN | 0.079849 | 1 | 5  | 10 |
| -CEGT | 0.079849 | 1 | 5  | 8  |
| -CEHL | 0.079849 | 2 | 10 | 17 |
| -CEKN | 0.079849 | 1 | 5  | 11 |
| -CELI | 0.079849 | 1 | 5  | 17 |
| -CEMN | 0.079849 | 1 | 5  | 11 |
| -CEMT | 0.079849 | 1 | 5  | 15 |
| -CEMV | 0.079849 | 1 | 5  | 6  |
| -CENV | 0.079849 | 1 | 5  | 3  |
| -CEPA | 0.079849 | 1 | 5  | 16 |
| -CEPG | 0.079849 | 1 | 5  | 7  |
| -CEQY | 0.079849 | 1 | 5  | 23 |
| -CERC | 0.079849 | 1 | 5  | 10 |
| -CETD | 0.079849 | 3 | 15 | 25 |
| -CETF | 0.079849 | 1 | 5  | 22 |

|       |          |   |    |    |
|-------|----------|---|----|----|
| -CETG | 0.079849 | 2 | 10 | 25 |
| -CETH | 0.079849 | 1 | 5  | 19 |
| -CETY | 0.079849 | 1 | 5  | 4  |
| -CEYG | 0.079849 | 2 | 10 | 30 |
| -CFAE | 0.079849 | 1 | 5  | 12 |
| -CFAQ | 0.079849 | 1 | 5  | 7  |
| -CFAT | 0.079849 | 1 | 5  | 24 |
| -CFDA | 0.079849 | 1 | 5  | 13 |
| -CFEI | 0.079849 | 1 | 5  | 4  |
| -CFGD | 0.079849 | 1 | 5  | 11 |
| -CFGE | 0.079849 | 1 | 5  | 3  |
| -CFGM | 0.079849 | 1 | 5  | 13 |
| -CFHP | 0.079849 | 1 | 5  | 13 |
| -CFKG | 0.079849 | 1 | 5  | 11 |
| -CFKK | 0.079849 | 1 | 5  | 2  |
| -CFLT | 0.079849 | 2 | 10 | 41 |
| -CFNS | 0.079849 | 1 | 5  | 17 |
| -CFPN | 0.079849 | 1 | 5  | 22 |
| -CFQI | 0.079849 | 1 | 5  | 5  |
| -CFRL | 0.079849 | 1 | 5  | 33 |
| -CFRQ | 0.079849 | 1 | 5  | 9  |
| -CFSK | 0.079849 | 2 | 10 | 22 |
| -CFTH | 0.079849 | 1 | 5  | 8  |
| -CFTS | 0.079849 | 4 | 20 | 38 |
| -CFVK | 0.079849 | 1 | 5  | 6  |
| -CGAE | 0.079849 | 1 | 5  | 11 |
| -CGCS | 0.079849 | 1 | 5  | 19 |
| -CGDF | 0.079849 | 1 | 5  | 8  |
| -CGDH | 0.079849 | 1 | 5  | 25 |
| -CGDQ | 0.079849 | 1 | 5  | 8  |
| -CGEN | 0.079849 | 1 | 5  | 17 |
| -CGFA | 0.079849 | 1 | 5  | 6  |
| -CGKM | 0.079849 | 2 | 10 | 31 |
| -CGKT | 0.079849 | 1 | 5  | 22 |
| -CGMR | 0.079849 | 2 | 10 | 42 |
| -CGNR | 0.079849 | 1 | 5  | 17 |
| -CGPF | 0.079849 | 1 | 5  | 30 |
| -CGPG | 0.079849 | 1 | 5  | 20 |
| -CGQV | 0.079849 | 1 | 5  | 11 |
| -CGRG | 0.079849 | 1 | 5  | 49 |
| -CGRV | 0.079849 | 2 | 10 | 55 |
| -CGTT | 0.079849 | 3 | 15 | 50 |
| -CGYP | 0.079849 | 1 | 5  | 20 |
| -CGYS | 0.079849 | 1 | 5  | 25 |
| -CHAV | 0.079849 | 1 | 5  | 23 |
| -CHDK | 0.079849 | 1 | 5  | 14 |
| -CHDS | 0.079849 | 1 | 5  | 29 |
| -CHDV | 0.079849 | 1 | 5  | 18 |
| -CHEI | 0.079849 | 1 | 5  | 5  |
| -CHEV | 0.079849 | 1 | 5  | 11 |
| -CHGE | 0.079849 | 1 | 5  | 6  |
| -CHGF | 0.079849 | 1 | 5  | 20 |
| -CHGG | 0.079849 | 1 | 5  | 8  |
| -CHGI | 0.079849 | 1 | 5  | 13 |
| -CHKA | 0.079849 | 1 | 5  | 24 |
| -CHKF | 0.079849 | 1 | 5  | 4  |
| -CHKT | 0.079849 | 1 | 5  | 15 |

|       |          |   |    |    |
|-------|----------|---|----|----|
| -CHLG | 0.079849 | 3 | 15 | 41 |
| -CHLI | 0.079849 | 1 | 5  | 23 |
| -CHMD | 0.079849 | 1 | 5  | 8  |
| -CHMP | 0.079849 | 1 | 5  | 18 |
| -CHNV | 0.079849 | 1 | 5  | 13 |
| -CHPV | 0.079849 | 1 | 5  | 19 |
| -CHQN | 0.079849 | 1 | 5  | 1  |
| -CHQS | 0.079849 | 1 | 5  | 17 |
| -CHSN | 0.079849 | 1 | 5  | 30 |
| -CHTI | 0.079849 | 1 | 5  | 16 |
| -CHWA | 0.079849 | 1 | 5  | 12 |
| -CHYP | 0.079849 | 1 | 5  | 7  |
| -CIAE | 0.079849 | 1 | 5  | 18 |
| -CIAH | 0.079849 | 1 | 5  | 15 |
| -CIDS | 0.079849 | 2 | 10 | 27 |
| -CIER | 0.079849 | 1 | 5  | 26 |
| -CIEV | 0.079849 | 1 | 5  | 5  |
| -CIFH | 0.079849 | 1 | 5  | 15 |
| -CIGC | 0.079849 | 1 | 5  | 6  |
| -CIKE | 0.079849 | 1 | 5  | 8  |
| -CIKV | 0.079849 | 1 | 5  | 16 |
| -CINN | 0.079849 | 1 | 5  | 15 |
| -CIPI | 0.079849 | 1 | 5  | 12 |
| -CIQS | 0.079849 | 1 | 5  | 19 |
| -CIRM | 0.079849 | 2 | 10 | 29 |
| -CIRY | 0.079849 | 1 | 5  | 9  |
| -CISL | 0.079849 | 4 | 20 | 48 |
| -CITD | 0.079849 | 1 | 5  | 10 |
| -CIYE | 0.079849 | 2 | 10 | 7  |
| -CKAI | 0.079849 | 1 | 5  | 18 |
| -CKCF | 0.079849 | 1 | 5  | 3  |
| -CKDF | 0.079849 | 1 | 5  | 13 |
| -CKDG | 0.079849 | 1 | 5  | 17 |
| -CKDP | 0.079849 | 1 | 5  | 12 |
| -CKFA | 0.079849 | 1 | 5  | 20 |
| -CKHR | 0.079849 | 1 | 5  | 6  |
| -CKKN | 0.079849 | 1 | 5  | 8  |
| -CKKP | 0.079849 | 1 | 5  | 17 |
| -CKLV | 0.079849 | 1 | 5  | 23 |
| -CKME | 0.079849 | 1 | 5  | 7  |
| -CKMQ | 0.079849 | 1 | 5  | 15 |
| -CKMT | 0.079849 | 1 | 5  | 17 |
| -CKNN | 0.079849 | 1 | 5  | 14 |
| -CKPM | 0.079849 | 1 | 5  | 16 |
| -CKPP | 0.079849 | 1 | 5  | 9  |
| -CKQT | 0.079849 | 1 | 5  | 16 |
| -CKRA | 0.079849 | 1 | 5  | 24 |
| -CKRC | 0.079849 | 2 | 10 | 21 |
| -CKSA | 0.079849 | 1 | 5  | 28 |
| -CKSD | 0.079849 | 1 | 5  | 25 |
| -CKSF | 0.079849 | 1 | 5  | 17 |
| -CKTV | 0.079849 | 1 | 5  | 27 |
| -CKWG | 0.079849 | 1 | 5  | 13 |
| -CKWL | 0.079849 | 1 | 5  | 20 |
| -CKYD | 0.079849 | 1 | 5  | 7  |
| -CKYH | 0.079849 | 1 | 5  | 19 |
| -CKYR | 0.079849 | 1 | 5  | 10 |

|       |          |    |    |    |
|-------|----------|----|----|----|
| -CLAA | 0.079849 | 1  | 5  | 33 |
| -CLAL | 0.079849 | 9  | 45 | 87 |
| -CLEI | 0.079849 | 1  | 5  | 14 |
| -CLEK | 0.079849 | 1  | 5  | 15 |
| -CLGW | 0.079849 | 1  | 5  | 33 |
| -CLHD | 0.079849 | 1  | 5  | 20 |
| -CLLW | 0.079849 | 1  | 5  | 75 |
| -CLNH | 0.079849 | 1  | 5  | 31 |
| -CLPQ | 0.079849 | 1  | 5  | 21 |
| -CLTW | 0.079849 | 2  | 10 | 50 |
| -CLVE | 0.079849 | 3  | 15 | 38 |
| -CLVF | 0.079849 | 1  | 5  | 23 |
| -CLWP | 0.079849 | 1  | 5  | 27 |
| -CLWV | 0.079849 | 1  | 5  | 24 |
| -CMAK | 0.079849 | 1  | 5  | 16 |
| -CMAY | 0.079849 | 1  | 5  | 11 |
| -CMDD | 0.079849 | 2  | 10 | 10 |
| -CMDM | 0.079849 | 2  | 10 | 23 |
| -CMEL | 0.079849 | 2  | 10 | 17 |
| -CMFE | 0.079849 | 1  | 5  | 12 |
| -CMGF | 0.079849 | 1  | 5  | 12 |
| -CMGN | 0.079849 | 1  | 5  | 13 |
| -CMHN | 0.079849 | 1  | 5  | 17 |
| -CMHV | 0.079849 | 1  | 5  | 20 |
| -CMIE | 0.079849 | 2  | 10 | 10 |
| -CMKT | 0.079849 | 1  | 5  | 20 |
| -CMLF | 0.079849 | 1  | 5  | 13 |
| -CMLW | 0.079849 | 1  | 5  | 21 |
| -CMMD | 0.079849 | 2  | 10 | 22 |
| -CMMF | 0.079849 | 1  | 5  | 11 |
| -CMNM | 0.079849 | 1  | 5  | 14 |
| -CMQL | 0.079849 | 1  | 5  | 20 |
| -CMRA | 0.079849 | 1  | 5  | 21 |
| -CMRE | 0.079849 | 1  | 5  | 18 |
| -CMRK | 0.079849 | 1  | 5  | 20 |
| -CMSA | 0.079849 | 2  | 10 | 19 |
| -CMTF | 0.079849 | 1  | 5  | 7  |
| -CMVK | 0.079849 | 1  | 5  | 10 |
| -CNAC | 0.079849 | 3  | 15 | 25 |
| -CNAE | 0.079849 | 1  | 5  | 10 |
| -CNAM | 0.079849 | 1  | 5  | 12 |
| -CNDA | 0.079849 | 1  | 5  | 19 |
| -CNDF | 0.079849 | 1  | 5  | 5  |
| -CNDK | 0.079849 | 2  | 10 | 13 |
| -CNDY | 0.079849 | 1  | 5  | 10 |
| -CNEC | 0.079849 | 1  | 5  | 7  |
| -CNEI | 0.079849 | 1  | 5  | 11 |
| -CNEQ | 0.079849 | 1  | 5  | 5  |
| -CNGE | 0.079849 | 1  | 5  | 16 |
| -CNGR | 0.079849 | 10 | 50 | 72 |
| -CNGY | 0.079849 | 2  | 10 | 29 |
| -CNHS | 0.079849 | 3  | 15 | 38 |
| -CNKM | 0.079849 | 1  | 5  | 26 |
| -CNMV | 0.079849 | 1  | 5  | 26 |
| -CNNG | 0.079849 | 1  | 5  | 29 |
| -CNNN | 0.079849 | 1  | 5  | 14 |
| -CNPE | 0.079849 | 1  | 5  | 10 |



|       |          |   |    |    |
|-------|----------|---|----|----|
| -CNPB | 0.079849 | 1 | 5  | 16 |
| -CNPL | 0.079849 | 2 | 10 | 35 |
| -CNPP | 0.079849 | 1 | 5  | 9  |
| -CNPS | 0.079849 | 1 | 5  | 45 |
| -CNQY | 0.079849 | 1 | 5  | 8  |
| -CNRI | 0.079849 | 1 | 5  | 17 |
| -CNRK | 0.079849 | 1 | 5  | 19 |
| -CNSG | 0.079849 | 2 | 10 | 28 |
| -CNTK | 0.079849 | 2 | 10 | 7  |
| -CNYD | 0.079849 | 1 | 5  | 9  |
| -CNYL | 0.079849 | 2 | 10 | 29 |
| -CNYV | 0.079849 | 1 | 5  | 28 |
| -CPAA | 0.079849 | 1 | 5  | 23 |
| -CPAG | 0.079849 | 2 | 10 | 23 |
| -CPAK | 0.079849 | 1 | 5  | 28 |
| -CPAP | 0.079849 | 1 | 5  | 21 |
| -CPDC | 0.079849 | 1 | 5  | 11 |
| -CPDK | 0.079849 | 1 | 5  | 9  |
| -CPDR | 0.079849 | 2 | 10 | 26 |
| -CPEF | 0.079849 | 1 | 5  | 17 |
| -CPEH | 0.079849 | 1 | 5  | 7  |
| -CPFP | 0.079849 | 1 | 5  | 24 |
| -CPFR | 0.079849 | 2 | 10 | 38 |
| -CPGT | 0.079849 | 1 | 5  | 37 |
| -CPHG | 0.079849 | 1 | 5  | 18 |
| -CPHT | 0.079849 | 1 | 5  | 30 |
| -CPHY | 0.079849 | 1 | 5  | 7  |
| -CPIN | 0.079849 | 1 | 5  | 19 |
| -CPKC | 0.079849 | 1 | 5  | 25 |
| -CPMD | 0.079849 | 2 | 10 | 15 |
| -CPMN | 0.079849 | 1 | 5  | 18 |
| -CPMT | 0.079849 | 1 | 5  | 18 |
| -CPMY | 0.079849 | 1 | 5  | 9  |
| -CPPM | 0.079849 | 3 | 15 | 17 |
| -CPQC | 0.079849 | 1 | 5  | 16 |
| -CPQE | 0.079849 | 1 | 5  | 9  |
| -CPSK | 0.079849 | 3 | 15 | 39 |
| -CPST | 0.079849 | 4 | 20 | 60 |
| -CPTI | 0.079849 | 1 | 5  | 15 |
| -CPTM | 0.079849 | 1 | 5  | 31 |
| -CPTP | 0.079849 | 2 | 10 | 30 |
| -CPVW | 0.079849 | 1 | 5  | 20 |
| -CPYD | 0.079849 | 1 | 5  | 20 |
| -CQAM | 0.079849 | 1 | 5  | 3  |
| -CQAT | 0.079849 | 1 | 5  | 7  |
| -CQAV | 0.079849 | 1 | 5  | 13 |
| -CQCS | 0.079849 | 1 | 5  | 16 |
| -CQDP | 0.079849 | 2 | 10 | 12 |
| -CQEE | 0.079849 | 1 | 5  | 3  |
| -CQEY | 0.079849 | 1 | 5  | 8  |
| -CQIG | 0.079849 | 1 | 5  | 6  |
| -CQKE | 0.079849 | 1 | 5  | 9  |
| -CQMD | 0.079849 | 1 | 5  | 7  |
| -CQMN | 0.079849 | 1 | 5  | 14 |
| -CQMP | 0.079849 | 2 | 10 | 10 |
| -CQMS | 0.079849 | 1 | 5  | 26 |
| -CQNA | 0.079849 | 1 | 5  | 7  |

|       |          |   |    |    |
|-------|----------|---|----|----|
| -CQNR | 0.079849 | 1 | 5  | 34 |
| -CQQS | 0.079849 | 1 | 5  | 12 |
| -CQQW | 0.079849 | 1 | 5  | 10 |
| -CQRA | 0.079849 | 1 | 5  | 19 |
| -CQRQ | 0.079849 | 1 | 5  | 23 |
| -CQRV | 0.079849 | 1 | 5  | 35 |
| -CQRY | 0.079849 | 1 | 5  | 22 |
| -CQSI | 0.079849 | 1 | 5  | 17 |
| -CQSL | 0.079849 | 2 | 10 | 41 |
| -CQSY | 0.079849 | 2 | 10 | 11 |
| -CQYF | 0.079849 | 1 | 5  | 7  |
| -CQYS | 0.079849 | 2 | 10 | 22 |
| -CRAD | 0.079849 | 3 | 15 | 44 |
| -CREW | 0.079849 | 1 | 5  | 12 |
| -CRGS | 0.079849 | 3 | 15 | 48 |
| -CRHF | 0.079849 | 1 | 5  | 16 |
| -CRHV | 0.079849 | 1 | 5  | 22 |
| -CRHY | 0.079849 | 1 | 5  | 19 |
| -CRLW | 0.079849 | 1 | 5  | 34 |
| -CRMK | 0.079849 | 1 | 5  | 20 |
| -CRNH | 0.079849 | 2 | 10 | 24 |
| -CRNI | 0.079849 | 1 | 5  | 20 |
| -CRQN | 0.079849 | 1 | 5  | 11 |
| -CRTH | 0.079849 | 1 | 5  | 24 |
| -CRVE | 0.079849 | 1 | 5  | 18 |
| -CRVG | 0.079849 | 2 | 10 | 33 |
| -CRVV | 0.079849 | 6 | 30 | 51 |
| -CSAW | 0.079849 | 1 | 5  | 22 |
| -CSAY | 0.079849 | 1 | 5  | 33 |
| -CSDF | 0.079849 | 1 | 5  | 24 |
| -CSDR | 0.079849 | 3 | 15 | 47 |
| -CSDY | 0.079849 | 2 | 10 | 19 |
| -CSEK | 0.079849 | 1 | 5  | 16 |
| -CSEP | 0.079849 | 2 | 10 | 27 |
| -CSFG | 0.079849 | 1 | 5  | 27 |
| -CSFR | 0.079849 | 2 | 10 | 22 |
| -CSGT | 0.079849 | 3 | 15 | 53 |
| -CSHI | 0.079849 | 1 | 5  | 28 |
| -CSKC | 0.079849 | 2 | 10 | 14 |
| -CSMH | 0.079849 | 1 | 5  | 15 |
| -CSMP | 0.079849 | 3 | 15 | 36 |
| -CSNG | 0.079849 | 4 | 20 | 40 |
| -CSNH | 0.079849 | 1 | 5  | 16 |
| -CSNW | 0.079849 | 1 | 5  | 35 |
| -CSPG | 0.079849 | 1 | 5  | 38 |
| -CTAE | 0.079849 | 1 | 5  | 27 |
| -CTAI | 0.079849 | 1 | 5  | 15 |
| -CTDY | 0.079849 | 1 | 5  | 11 |
| -CTEK | 0.079849 | 1 | 5  | 10 |
| -CTFD | 0.079849 | 2 | 10 | 11 |
| -CTGP | 0.079849 | 1 | 5  | 15 |
| -CTGY | 0.079849 | 1 | 5  | 13 |
| -CTHA | 0.079849 | 1 | 5  | 16 |
| -CTKC | 0.079849 | 1 | 5  | 5  |
| -CTKD | 0.079849 | 1 | 5  | 9  |
| -CTME | 0.079849 | 3 | 15 | 22 |
| -CTND | 0.079849 | 2 | 10 | 14 |

|       |          |   |    |    |
|-------|----------|---|----|----|
| -CTNP | 0.079849 | 1 | 5  | 15 |
| -CTNQ | 0.079849 | 1 | 5  | 16 |
| -CTNW | 0.079849 | 1 | 5  | 29 |
| -CTPD | 0.079849 | 2 | 10 | 10 |
| -CTQS | 0.079849 | 1 | 5  | 42 |
| -CTTI | 0.079849 | 3 | 15 | 38 |
| -CTTY | 0.079849 | 1 | 5  | 16 |
| -CTVE | 0.079849 | 2 | 10 | 30 |
| -CTYH | 0.079849 | 1 | 5  | 12 |
| -CVAA | 0.079849 | 1 | 5  | 20 |
| -CVCG | 0.079849 | 1 | 5  | 17 |
| -CVDD | 0.079849 | 1 | 5  | 14 |
| -CVDM | 0.079849 | 1 | 5  | 23 |
| -CVDQ | 0.079849 | 1 | 5  | 11 |
| -CVDV | 0.079849 | 4 | 20 | 21 |
| -CVEN | 0.079849 | 1 | 5  | 17 |
| -CWEW | 0.079849 | 1 | 5  | 17 |
| -CWEY | 0.079849 | 1 | 5  | 7  |
| -CVGD | 0.079849 | 1 | 5  | 15 |
| -CVHG | 0.079849 | 2 | 10 | 24 |
| -CVHP | 0.079849 | 1 | 5  | 32 |
| -CVHT | 0.079849 | 1 | 5  | 13 |
| -CVLD | 0.079849 | 2 | 10 | 24 |
| -CVQA | 0.079849 | 1 | 5  | 20 |
| -CVQD | 0.079849 | 1 | 5  | 18 |
| -CVQV | 0.079849 | 1 | 5  | 47 |
| -CVQW | 0.079849 | 1 | 5  | 16 |
| -CVQY | 0.079849 | 1 | 5  | 17 |
| -CVRI | 0.079849 | 1 | 5  | 33 |
| -CVRV | 0.079849 | 4 | 20 | 69 |
| -CVWT | 0.079849 | 1 | 5  | 17 |
| -CVYN | 0.079849 | 2 | 10 | 15 |
| -CWDY | 0.079849 | 1 | 5  | 8  |
| -CWFG | 0.079849 | 1 | 5  | 20 |
| -CWGG | 0.079849 | 1 | 5  | 4  |
| -CWGN | 0.079849 | 1 | 5  | 9  |
| -CWGS | 0.079849 | 1 | 5  | 18 |
| -CWHS | 0.079849 | 1 | 5  | 15 |
| -CWKD | 0.079849 | 2 | 10 | 15 |
| -CWLD | 0.079849 | 1 | 5  | 30 |
| -CWLP | 0.079849 | 1 | 5  | 25 |
| -CWNR | 0.079849 | 1 | 5  | 21 |
| -CWNT | 0.079849 | 1 | 5  | 22 |
| -CWPE | 0.079849 | 2 | 10 | 11 |
| -CWQD | 0.079849 | 1 | 5  | 15 |
| -CWQE | 0.079849 | 2 | 10 | 4  |
| -CWQS | 0.079849 | 1 | 5  | 16 |
| -CWQT | 0.079849 | 1 | 5  | 17 |
| -CWRL | 0.079849 | 1 | 5  | 36 |
| -CWSK | 0.079849 | 1 | 5  | 19 |
| -CWTE | 0.079849 | 1 | 5  | 13 |
| -CWTH | 0.079849 | 1 | 5  | 13 |
| -CYAE | 0.079849 | 2 | 10 | 15 |
| -CYCK | 0.079849 | 1 | 5  | 13 |
| -CYDC | 0.079849 | 1 | 5  | 6  |
| -CYDR | 0.079849 | 5 | 25 | 25 |
| -CYEM | 0.079849 | 1 | 5  | 9  |

|       |          |    |    |     |
|-------|----------|----|----|-----|
| -CYEP | 0.079849 | 2  | 10 | 26  |
| -CYHE | 0.079849 | 1  | 5  | 6   |
| -CYKI | 0.079849 | 1  | 5  | 11  |
| -CYKM | 0.079849 | 1  | 5  | 14  |
| -CYLY | 0.079849 | 1  | 5  | 13  |
| -CYNA | 0.079849 | 1  | 5  | 19  |
| -CYNR | 0.079849 | 1  | 5  | 29  |
| -CYPE | 0.079849 | 1  | 5  | 6   |
| -CYQK | 0.079849 | 1  | 5  | 13  |
| -CYQT | 0.079849 | 1  | 5  | 15  |
| -CYRT | 0.079849 | 1  | 5  | 40  |
| -CYSQ | 0.079849 | 2  | 10 | 40  |
| -CYTE | 0.079849 | 1  | 5  | 10  |
| -CYWS | 0.079849 | 1  | 5  | 14  |
| -CYYP | 0.079849 | 1  | 5  | 22  |
| -CLLV | 0.081897 | 8  | 39 | 95  |
| -CRDL | 0.081897 | 8  | 39 | 62  |
| -CNDM | 0.082603 | 6  | 29 | 17  |
| -CPAL | 0.082603 | 6  | 29 | 61  |
| -CLSV | 0.082862 | 11 | 53 | 98  |
| -CLDQ | 0.083176 | 5  | 24 | 45  |
| -CSSY | 0.083176 | 5  | 24 | 45  |
| -CTTS | 0.083176 | 5  | 24 | 70  |
| -CVPT | 0.083176 | 5  | 24 | 54  |
| -CASV | 0.084052 | 4  | 19 | 47  |
| -CGSA | 0.084052 | 4  | 19 | 38  |
| -CSEV | 0.084052 | 4  | 19 | 35  |
| -CSVI | 0.084052 | 4  | 19 | 48  |
| -CTAS | 0.084052 | 4  | 19 | 54  |
| -CAPL | 0.085553 | 3  | 14 | 49  |
| -CDNF | 0.085553 | 3  | 14 | 16  |
| -CECL | 0.085553 | 3  | 14 | 26  |
| -CESN | 0.085553 | 6  | 28 | 29  |
| -CFDD | 0.085553 | 3  | 14 | 15  |
| -CGVR | 0.085553 | 3  | 14 | 22  |
| -CKNA | 0.085553 | 3  | 14 | 18  |
| -CLQK | 0.085553 | 3  | 14 | 20  |
| -CLYS | 0.085553 | 3  | 14 | 59  |
| -CMRP | 0.085553 | 3  | 14 | 25  |
| -CNLT | 0.085553 | 3  | 14 | 54  |
| -CNPR | 0.085553 | 3  | 14 | 27  |
| -CPAS | 0.085553 | 3  | 14 | 38  |
| -CPLS | 0.085553 | 6  | 28 | 82  |
| -CPRP | 0.085553 | 3  | 14 | 37  |
| -CRRV | 0.085553 | 6  | 28 | 101 |
| -CRSM | 0.085553 | 3  | 14 | 57  |
| -CRTK | 0.085553 | 3  | 14 | 47  |
| -CRYS | 0.085553 | 3  | 14 | 32  |
| -CSFD | 0.085553 | 3  | 14 | 24  |
| -CSGP | 0.085553 | 3  | 14 | 27  |
| -CSTW | 0.085553 | 3  | 14 | 28  |
| -CTAT | 0.085553 | 3  | 14 | 43  |
| -CTLK | 0.085553 | 3  | 14 | 47  |
| -CYIP | 0.085553 | 3  | 14 | 26  |
| -CDNL | 0.086793 | 5  | 23 | 33  |
| -CRST | 0.086793 | 5  | 23 | 86  |
| -CSRS | 0.086793 | 15 | 69 | 153 |

|       |          |   |    |    |
|-------|----------|---|----|----|
| -CSSM | 0.086793 | 5 | 23 | 69 |
| -CAEA | 0.088721 | 2 | 9  | 14 |
| -CAFR | 0.088721 | 2 | 9  | 41 |
| -CAGS | 0.088721 | 4 | 18 | 35 |
| -CAQD | 0.088721 | 2 | 9  | 11 |
| -CATI | 0.088721 | 2 | 9  | 33 |
| -CAWS | 0.088721 | 2 | 9  | 44 |
| -CAWT | 0.088721 | 2 | 9  | 24 |
| -CCAN | 0.088721 | 2 | 9  | 18 |
| -CCDS | 0.088721 | 2 | 9  | 12 |
| -CDAM | 0.088721 | 2 | 9  | 19 |
| -CDFG | 0.088721 | 2 | 9  | 14 |
| -CDLK | 0.088721 | 2 | 9  | 22 |
| -CDSG | 0.088721 | 4 | 18 | 48 |
| -CDTT | 0.088721 | 2 | 9  | 17 |
| -CDVV | 0.088721 | 4 | 18 | 34 |
| -CEAP | 0.088721 | 2 | 9  | 17 |
| -CEIE | 0.088721 | 2 | 9  | 9  |
| -CEYL | 0.088721 | 2 | 9  | 19 |
| -CEYS | 0.088721 | 2 | 9  | 26 |
| -CEYT | 0.088721 | 2 | 9  | 16 |
| -CFLK | 0.088721 | 2 | 9  | 24 |
| -CFPA | 0.088721 | 2 | 9  | 13 |
| -CGGM | 0.088721 | 2 | 9  | 22 |
| -CGMG | 0.088721 | 2 | 9  | 19 |
| -CGNS | 0.088721 | 2 | 9  | 20 |
| -CGPT | 0.088721 | 2 | 9  | 28 |
| -CHPE | 0.088721 | 2 | 9  | 8  |
| -CHSR | 0.088721 | 2 | 9  | 36 |
| -CIDD | 0.088721 | 2 | 9  | 17 |
| -CISC | 0.088721 | 2 | 9  | 8  |
| -CKGA | 0.088721 | 2 | 9  | 10 |
| -CKGF | 0.088721 | 2 | 9  | 12 |
| -CKKM | 0.088721 | 2 | 9  | 10 |
| -CKMI | 0.088721 | 2 | 9  | 14 |
| -CKNL | 0.088721 | 2 | 9  | 26 |
| -CKPI | 0.088721 | 2 | 9  | 17 |
| -CKSI | 0.088721 | 4 | 18 | 20 |
| -CKSY | 0.088721 | 2 | 9  | 23 |
| -CLAD | 0.088721 | 2 | 9  | 21 |
| -CLAY | 0.088721 | 2 | 9  | 35 |
| -CLDC | 0.088721 | 2 | 9  | 16 |
| -CLNA | 0.088721 | 2 | 9  | 29 |
| -CLRG | 0.088721 | 4 | 18 | 63 |
| -CMDP | 0.088721 | 2 | 9  | 9  |
| -CMDR | 0.088721 | 2 | 9  | 15 |
| -CMGS | 0.088721 | 2 | 9  | 16 |
| -CMLV | 0.088721 | 2 | 9  | 32 |
| -CMRI | 0.088721 | 2 | 9  | 15 |
| -CNAG | 0.088721 | 2 | 9  | 18 |
| -CNAR | 0.088721 | 2 | 9  | 36 |
| -CNCT | 0.088721 | 2 | 9  | 31 |
| -CNPT | 0.088721 | 2 | 9  | 29 |
| -CNSE | 0.088721 | 2 | 9  | 18 |
| -CNTP | 0.088721 | 4 | 18 | 26 |
| -CNTY | 0.088721 | 2 | 9  | 20 |
| -CPFG | 0.088721 | 2 | 9  | 13 |

|        |          |    |    |     |
|--------|----------|----|----|-----|
| -CPPR  | 0.088721 | 2  | 9  | 51  |
| -CQSE  | 0.088721 | 2  | 9  | 19  |
| -CRRN  | 0.088721 | 2  | 9  | 30  |
| -CRSI  | 0.088721 | 4  | 18 | 38  |
| -CRTC  | 0.088721 | 2  | 9  | 25  |
| -CSCL  | 0.088721 | 2  | 9  | 76  |
| -CSEQ  | 0.088721 | 2  | 9  | 11  |
| -CSKE  | 0.088721 | 2  | 9  | 22  |
| -CSLE  | 0.088721 | 4  | 18 | 77  |
| -CSPP  | 0.088721 | 2  | 9  | 22  |
| -CSWE  | 0.088721 | 4  | 18 | 22  |
| -CTKE  | 0.088721 | 2  | 9  | 22  |
| -CTKH  | 0.088721 | 2  | 9  | 23  |
| -CTRA  | 0.088721 | 2  | 9  | 21  |
| -CTWL  | 0.088721 | 2  | 9  | 31  |
| -CTYL  | 0.088721 | 4  | 18 | 59  |
| -CVEI  | 0.088721 | 2  | 9  | 20  |
| -CVFV  | 0.088721 | 2  | 9  | 23  |
| -CVKN  | 0.088721 | 2  | 9  | 15  |
| -CVLW  | 0.088721 | 2  | 9  | 45  |
| -CVQL  | 0.088721 | 2  | 9  | 28  |
| -CVRY  | 0.088721 | 2  | 9  | 26  |
| -CYAD  | 0.088721 | 2  | 9  | 8   |
| -CYGQ  | 0.088721 | 2  | 9  | 12  |
| -CYMP  | 0.088721 | 2  | 9  | 34  |
| -CYPH  | 0.088721 | 2  | 9  | 9   |
| -CYP I | 0.088721 | 2  | 9  | 20  |
| -CYPN  | 0.088721 | 2  | 9  | 31  |
| -CYRC  | 0.088721 | 2  | 9  | 17  |
| -CYSE  | 0.088721 | 4  | 18 | 20  |
| -CYTG  | 0.088721 | 2  | 9  | 17  |
| -CLKS  | 0.088721 | 6  | 27 | 63  |
| -CLRD  | 0.088721 | 6  | 27 | 26  |
| -CSDL  | 0.088721 | 6  | 27 | 39  |
| -CSRA  | 0.088721 | 6  | 27 | 62  |
| -CSRV  | 0.088721 | 6  | 27 | 90  |
| -CSSN  | 0.088721 | 6  | 27 | 45  |
| -CSSL  | 0.089627 | 11 | 49 | 119 |
| -CSLR  | 0.08983  | 9  | 40 | 127 |
| -CFSR  | 0.090152 | 7  | 31 | 69  |
| -CLRA  | 0.090738 | 5  | 22 | 64  |
| -CSEC  | 0.091394 | 19 | 83 | 46  |
| -CADA  | 0.092134 | 3  | 13 | 8   |
| -CAEW  | 0.092134 | 3  | 13 | 16  |
| -CAKD  | 0.092134 | 3  | 13 | 31  |
| -CDVG  | 0.092134 | 3  | 13 | 21  |
| -CDVP  | 0.092134 | 3  | 13 | 23  |
| -CEAK  | 0.092134 | 3  | 13 | 22  |
| -CFQT  | 0.092134 | 3  | 13 | 16  |
| -CHGQ  | 0.092134 | 3  | 13 | 14  |
| -CHLA  | 0.092134 | 3  | 13 | 33  |
| -CHVE  | 0.092134 | 3  | 13 | 16  |
| -CIYV  | 0.092134 | 3  | 13 | 14  |
| -CLSW  | 0.092134 | 3  | 13 | 43  |
| -CLYL  | 0.092134 | 3  | 13 | 77  |
| -CLYR  | 0.092134 | 3  | 13 | 60  |
| -CNFS  | 0.092134 | 3  | 13 | 22  |

|       |          |    |    |     |
|-------|----------|----|----|-----|
| -CNVR | 0.092134 | 6  | 26 | 62  |
| -CPNG | 0.092134 | 3  | 13 | 42  |
| -CQDT | 0.092134 | 3  | 13 | 22  |
| -CQTP | 0.092134 | 3  | 13 | 29  |
| -CRDG | 0.092134 | 3  | 13 | 32  |
| -CSGR | 0.092134 | 6  | 26 | 77  |
| -CSHG | 0.092134 | 3  | 13 | 37  |
| -CTFR | 0.092134 | 3  | 13 | 47  |
| -CTHR | 0.092134 | 3  | 13 | 38  |
| -CWSL | 0.092134 | 3  | 13 | 58  |
| -CYDL | 0.092134 | 3  | 13 | 27  |
| -CSER | 0.093157 | 7  | 30 | 50  |
| -CASL | 0.09394  | 8  | 34 | 74  |
| -CDSA | 0.09394  | 4  | 17 | 37  |
| -CMTR | 0.09394  | 4  | 17 | 42  |
| -CSYI | 0.09394  | 4  | 17 | 36  |
| -CTAL | 0.09394  | 4  | 17 | 48  |
| -CVRP | 0.09394  | 4  | 17 | 53  |
| -CLLR | 0.094558 | 9  | 38 | 135 |
| -CGYR | 0.095058 | 5  | 21 | 42  |
| -CRTD | 0.095058 | 5  | 21 | 35  |
| -CSFS | 0.095058 | 5  | 21 | 28  |
| -CTLG | 0.095058 | 5  | 21 | 62  |
| -CPRG | 0.095819 | 6  | 25 | 39  |
| -CLSN | 0.096787 | 8  | 33 | 34  |
| -CTLR | 0.097114 | 9  | 37 | 98  |
| -CVRL | 0.097593 | 11 | 45 | 104 |
| -CAAA | 0.099811 | 1  | 4  | 9   |
| -CAAH | 0.099811 | 1  | 4  | 14  |
| -CAAN | 0.099811 | 1  | 4  | 11  |
| -CACK | 0.099811 | 1  | 4  | 15  |
| -CACL | 0.099811 | 2  | 8  | 37  |
| -CADR | 0.099811 | 1  | 4  | 31  |
| -CAEI | 0.099811 | 2  | 8  | 13  |
| -CAEM | 0.099811 | 1  | 4  | 18  |
| -CAES | 0.099811 | 3  | 12 | 32  |
| -CAGC | 0.099811 | 1  | 4  | 17  |
| -CAGD | 0.099811 | 1  | 4  | 4   |
| -CAGE | 0.099811 | 2  | 8  | 30  |
| -CAGG | 0.099811 | 1  | 4  | 22  |
| -CAGH | 0.099811 | 1  | 4  | 13  |
| -CAGP | 0.099811 | 1  | 4  | 14  |
| -CAHE | 0.099811 | 1  | 4  | 4   |
| -CAIK | 0.099811 | 1  | 4  | 20  |
| -CAKE | 0.099811 | 1  | 4  | 8   |
| -CAKQ | 0.099811 | 2  | 8  | 20  |
| -CALN | 0.099811 | 1  | 4  | 33  |
| -CAMN | 0.099811 | 2  | 8  | 23  |
| -CAMR | 0.099811 | 3  | 12 | 39  |
| -CANK | 0.099811 | 1  | 4  | 24  |
| -CAPA | 0.099811 | 1  | 4  | 14  |
| -CAPI | 0.099811 | 1  | 4  | 7   |
| -CAPW | 0.099811 | 1  | 4  | 17  |
| -CAQK | 0.099811 | 2  | 8  | 18  |
| -CARG | 0.099811 | 4  | 16 | 33  |
| -CARQ | 0.099811 | 1  | 4  | 37  |
| -CARY | 0.099811 | 1  | 4  | 19  |

|       |          |   |    |    |
|-------|----------|---|----|----|
| -CASN | 0.099811 | 4 | 16 | 33 |
| -CATA | 0.099811 | 1 | 4  | 12 |
| -CATE | 0.099811 | 3 | 12 | 21 |
| -CATF | 0.099811 | 1 | 4  | 19 |
| -CATN | 0.099811 | 1 | 4  | 13 |
| -CATT | 0.099811 | 2 | 8  | 46 |
| -CATW | 0.099811 | 1 | 4  | 21 |
| -CAWK | 0.099811 | 1 | 4  | 7  |
| -CAWW | 0.099811 | 1 | 4  | 15 |
| -CAYE | 0.099811 | 1 | 4  | 13 |
| -CAYV | 0.099811 | 3 | 12 | 24 |
| -CCAR | 0.099811 | 3 | 12 | 31 |
| -CCAT | 0.099811 | 1 | 4  | 23 |
| -CCCN | 0.099811 | 1 | 4  | 5  |
| -CCCS | 0.099811 | 2 | 8  | 24 |
| -CCCT | 0.099811 | 1 | 4  | 10 |
| -CCDD | 0.099811 | 1 | 4  | 7  |
| -CCDK | 0.099811 | 1 | 4  | 10 |
| -CCFE | 0.099811 | 1 | 4  | 20 |
| -CCFL | 0.099811 | 1 | 4  | 13 |
| -CCGC | 0.099811 | 1 | 4  | 22 |
| -CCGN | 0.099811 | 1 | 4  | 20 |
| -CCGY | 0.099811 | 1 | 4  | 12 |
| -CCHW | 0.099811 | 1 | 4  | 14 |
| -CCKE | 0.099811 | 1 | 4  | 15 |
| -CCKR | 0.099811 | 1 | 4  | 16 |
| -CCME | 0.099811 | 1 | 4  | 9  |
| -CCNT | 0.099811 | 1 | 4  | 15 |
| -CCPE | 0.099811 | 2 | 8  | 10 |
| -CCPF | 0.099811 | 1 | 4  | 17 |
| -CCPW | 0.099811 | 1 | 4  | 6  |
| -CCQC | 0.099811 | 1 | 4  | 21 |
| -CCQV | 0.099811 | 1 | 4  | 11 |
| -CCRT | 0.099811 | 3 | 12 | 37 |
| -CCRW | 0.099811 | 1 | 4  | 19 |
| -CCSC | 0.099811 | 1 | 4  | 6  |
| -CCSE | 0.099811 | 1 | 4  | 22 |
| -CCSG | 0.099811 | 1 | 4  | 29 |
| -CCSN | 0.099811 | 1 | 4  | 15 |
| -CCTD | 0.099811 | 1 | 4  | 15 |
| -CCTY | 0.099811 | 1 | 4  | 8  |
| -CCYK | 0.099811 | 1 | 4  | 6  |
| -CCYP | 0.099811 | 1 | 4  | 12 |
| -CDAH | 0.099811 | 1 | 4  | 8  |
| -CDAY | 0.099811 | 1 | 4  | 20 |
| -CDCH | 0.099811 | 1 | 4  | 20 |
| -CDCY | 0.099811 | 1 | 4  | 6  |
| -CDDF | 0.099811 | 1 | 4  | 9  |
| -CDES | 0.099811 | 1 | 4  | 11 |
| -CDFK | 0.099811 | 1 | 4  | 6  |
| -CDFS | 0.099811 | 3 | 12 | 32 |
| -CDHN | 0.099811 | 2 | 8  | 10 |
| -CDIE | 0.099811 | 1 | 4  | 13 |
| -CDIG | 0.099811 | 2 | 8  | 12 |
| -CDIR | 0.099811 | 3 | 12 | 39 |
| -CDKN | 0.099811 | 1 | 4  | 12 |
| -CDKR | 0.099811 | 1 | 4  | 19 |



|       |          |   |    |    |
|-------|----------|---|----|----|
| -CDLV | 0.099811 | 4 | 16 | 39 |
| -CDMF | 0.099811 | 1 | 4  | 16 |
| -CDNH | 0.099811 | 1 | 4  | 13 |
| -CDNR | 0.099811 | 1 | 4  | 27 |
| -CDPE | 0.099811 | 1 | 4  | 18 |
| -CDPG | 0.099811 | 1 | 4  | 14 |
| -CDPK | 0.099811 | 2 | 8  | 9  |
| -CDPM | 0.099811 | 1 | 4  | 8  |
| -CDQD | 0.099811 | 2 | 8  | 2  |
| -CDQK | 0.099811 | 1 | 4  | 5  |
| -CDQN | 0.099811 | 1 | 4  | 19 |
| -CDSH | 0.099811 | 1 | 4  | 24 |
| -CDSR | 0.099811 | 3 | 12 | 43 |
| -CDTD | 0.099811 | 2 | 8  | 14 |
| -CDTF | 0.099811 | 1 | 4  | 15 |
| -CDTR | 0.099811 | 2 | 8  | 42 |
| -CDVE | 0.099811 | 1 | 4  | 13 |
| -CDVR | 0.099811 | 6 | 24 | 61 |
| -CDWA | 0.099811 | 1 | 4  | 8  |
| -CDYN | 0.099811 | 2 | 8  | 11 |
| -CEAE | 0.099811 | 1 | 4  | 11 |
| -CEAW | 0.099811 | 1 | 4  | 11 |
| -CECR | 0.099811 | 1 | 4  | 13 |
| -CEEC | 0.099811 | 1 | 4  | 2  |
| -CEEE | 0.099811 | 1 | 4  | 4  |
| -CEFH | 0.099811 | 2 | 8  | 12 |
| -CEFT | 0.099811 | 1 | 4  | 15 |
| -CEGF | 0.099811 | 1 | 4  | 10 |
| -CEHI | 0.099811 | 1 | 4  | 3  |
| -CEKA | 0.099811 | 1 | 4  | 8  |
| -CEKH | 0.099811 | 1 | 4  | 5  |
| -CEKV | 0.099811 | 1 | 4  | 8  |
| -CEKW | 0.099811 | 1 | 4  | 4  |
| -CELA | 0.099811 | 3 | 12 | 32 |
| -CELF | 0.099811 | 1 | 4  | 9  |
| -CELN | 0.099811 | 2 | 8  | 21 |
| -CELW | 0.099811 | 1 | 4  | 17 |
| -CENK | 0.099811 | 1 | 4  | 7  |
| -CENL | 0.099811 | 1 | 4  | 23 |
| -CEPD | 0.099811 | 1 | 4  | 14 |
| -CEPP | 0.099811 | 1 | 4  | 10 |
| -CEPW | 0.099811 | 1 | 4  | 15 |
| -CEPY | 0.099811 | 1 | 4  | 10 |
| -CERT | 0.099811 | 2 | 8  | 36 |
| -CERW | 0.099811 | 1 | 4  | 19 |
| -CETW | 0.099811 | 1 | 4  | 7  |
| -CEVK | 0.099811 | 1 | 4  | 4  |
| -CEVN | 0.099811 | 1 | 4  | 19 |
| -CEVY | 0.099811 | 1 | 4  | 14 |
| -CEWD | 0.099811 | 1 | 4  | 3  |
| -CEWN | 0.099811 | 1 | 4  | 12 |
| -CFAL | 0.099811 | 2 | 8  | 36 |
| -CFAS | 0.099811 | 1 | 4  | 15 |
| -CFDK | 0.099811 | 1 | 4  | 4  |
| -CFDT | 0.099811 | 3 | 12 | 18 |
| -CFET | 0.099811 | 1 | 4  | 14 |
| -CFFE | 0.099811 | 1 | 4  | 11 |

|       |          |   |    |    |
|-------|----------|---|----|----|
| -CFFV | 0.099811 | 1 | 4  | 22 |
| -CFGN | 0.099811 | 1 | 4  | 22 |
| -CFHF | 0.099811 | 1 | 4  | 5  |
| -CFIG | 0.099811 | 1 | 4  | 8  |
| -CFIY | 0.099811 | 1 | 4  | 11 |
| -CFKL | 0.099811 | 1 | 4  | 19 |
| -CFKR | 0.099811 | 1 | 4  | 15 |
| -CFLL | 0.099811 | 2 | 8  | 64 |
| -CFLN | 0.099811 | 1 | 4  | 33 |
| -CFNE | 0.099811 | 1 | 4  | 11 |
| -CFPC | 0.099811 | 1 | 4  | 10 |
| -CFPK | 0.099811 | 1 | 4  | 10 |
| -CFPQ | 0.099811 | 1 | 4  | 6  |
| -CFQA | 0.099811 | 1 | 4  | 8  |
| -CFQG | 0.099811 | 1 | 4  | 14 |
| -CFQV | 0.099811 | 1 | 4  | 9  |
| -CFRD | 0.099811 | 1 | 4  | 13 |
| -CFRP | 0.099811 | 1 | 4  | 32 |
| -CFSL | 0.099811 | 2 | 8  | 45 |
| -CFTR | 0.099811 | 1 | 4  | 26 |
| -CFVG | 0.099811 | 3 | 12 | 22 |
| -CFVH | 0.099811 | 1 | 4  | 12 |
| -CGAN | 0.099811 | 1 | 4  | 9  |
| -CGCD | 0.099811 | 1 | 4  | 9  |
| -CGCL | 0.099811 | 2 | 8  | 34 |
| -CGCM | 0.099811 | 1 | 4  | 5  |
| -CGDA | 0.099811 | 1 | 4  | 8  |
| -CGDC | 0.099811 | 1 | 4  | 12 |
| -CGDE | 0.099811 | 1 | 4  | 15 |
| -CGDN | 0.099811 | 1 | 4  | 2  |
| -CGDS | 0.099811 | 1 | 4  | 20 |
| -CGDW | 0.099811 | 1 | 4  | 19 |
| -CGEM | 0.099811 | 1 | 4  | 16 |
| -CGEP | 0.099811 | 1 | 4  | 14 |
| -CGFP | 0.099811 | 1 | 4  | 10 |
| -CGGQ | 0.099811 | 1 | 4  | 12 |
| -CGHH | 0.099811 | 1 | 4  | 14 |
| -CGHQ | 0.099811 | 1 | 4  | 12 |
| -CGID | 0.099811 | 1 | 4  | 9  |
| -CGIP | 0.099811 | 1 | 4  | 18 |
| -CGKK | 0.099811 | 1 | 4  | 11 |
| -CGKY | 0.099811 | 2 | 8  | 19 |
| -CGLL | 0.099811 | 8 | 32 | 71 |
| -CGLY | 0.099811 | 1 | 4  | 16 |
| -CGME | 0.099811 | 2 | 8  | 18 |
| -CGMH | 0.099811 | 1 | 4  | 11 |
| -CGML | 0.099811 | 1 | 4  | 31 |
| -CGNC | 0.099811 | 1 | 4  | 17 |
| -CGNH | 0.099811 | 1 | 4  | 12 |
| -CGQK | 0.099811 | 1 | 4  | 10 |
| -CGQN | 0.099811 | 1 | 4  | 7  |
| -CGQT | 0.099811 | 1 | 4  | 9  |
| -CGQW | 0.099811 | 1 | 4  | 5  |
| -CGVE | 0.099811 | 1 | 4  | 16 |
| -CGYD | 0.099811 | 1 | 4  | 8  |
| -CGYH | 0.099811 | 1 | 4  | 21 |
| -CGYY | 0.099811 | 1 | 4  | 12 |

|       |          |   |    |    |
|-------|----------|---|----|----|
| -CHAG | 0.099811 | 1 | 4  | 11 |
| -CHAN | 0.099811 | 3 | 12 | 16 |
| -CHAY | 0.099811 | 2 | 8  | 7  |
| -CHCE | 0.099811 | 1 | 4  | 8  |
| -CHCK | 0.099811 | 1 | 4  | 8  |
| -CHCR | 0.099811 | 1 | 4  | 26 |
| -CHDI | 0.099811 | 3 | 12 | 19 |
| -CHEG | 0.099811 | 1 | 4  | 12 |
| -CHEM | 0.099811 | 1 | 4  | 8  |
| -CHET | 0.099811 | 1 | 4  | 26 |
| -CHFP | 0.099811 | 1 | 4  | 8  |
| -CHFV | 0.099811 | 1 | 4  | 18 |
| -CHGP | 0.099811 | 2 | 8  | 18 |
| -CHHD | 0.099811 | 1 | 4  | 11 |
| -CHIK | 0.099811 | 1 | 4  | 11 |
| -CHKL | 0.099811 | 1 | 4  | 8  |
| -CHKR | 0.099811 | 1 | 4  | 18 |
| -CHNA | 0.099811 | 1 | 4  | 17 |
| -CHND | 0.099811 | 1 | 4  | 15 |
| -CHNN | 0.099811 | 1 | 4  | 10 |
| -CHNR | 0.099811 | 1 | 4  | 18 |
| -CHQG | 0.099811 | 1 | 4  | 8  |
| -CHRF | 0.099811 | 1 | 4  | 15 |
| -CHRK | 0.099811 | 1 | 4  | 23 |
| -CHRP | 0.099811 | 2 | 8  | 32 |
| -CHRR | 0.099811 | 2 | 8  | 35 |
| -CHRS | 0.099811 | 4 | 16 | 34 |
| -CHRW | 0.099811 | 1 | 4  | 13 |
| -CHSC | 0.099811 | 2 | 8  | 26 |
| -CHSK | 0.099811 | 2 | 8  | 13 |
| -CHTG | 0.099811 | 1 | 4  | 12 |
| -CHTQ | 0.099811 | 1 | 4  | 27 |
| -CHTS | 0.099811 | 3 | 12 | 49 |
| -CHTY | 0.099811 | 1 | 4  | 15 |
| -CHYC | 0.099811 | 1 | 4  | 6  |
| -CIAG | 0.099811 | 2 | 8  | 15 |
| -CIDY | 0.099811 | 1 | 4  | 9  |
| -CIEA | 0.099811 | 1 | 4  | 9  |
| -CIGT | 0.099811 | 1 | 4  | 12 |
| -CIKA | 0.099811 | 1 | 4  | 10 |
| -CIKF | 0.099811 | 1 | 4  | 7  |
| -CIKN | 0.099811 | 1 | 4  | 4  |
| -CILR | 0.099811 | 4 | 16 | 59 |
| -CILW | 0.099811 | 1 | 4  | 23 |
| -CINF | 0.099811 | 1 | 4  | 14 |
| -CINL | 0.099811 | 3 | 12 | 30 |
| -CIPW | 0.099811 | 1 | 4  | 9  |
| -CIQK | 0.099811 | 1 | 4  | 6  |
| -CIQL | 0.099811 | 1 | 4  | 21 |
| -CIQY | 0.099811 | 1 | 4  | 14 |
| -CIRI | 0.099811 | 1 | 4  | 31 |
| -CIRW | 0.099811 | 1 | 4  | 24 |
| -CISA | 0.099811 | 2 | 8  | 11 |
| -CISW | 0.099811 | 1 | 4  | 18 |
| -CITI | 0.099811 | 1 | 4  | 14 |
| -CITK | 0.099811 | 3 | 12 | 24 |
| -CIYL | 0.099811 | 1 | 4  | 40 |

|       |          |   |    |    |
|-------|----------|---|----|----|
| -CKAF | 0.099811 | 2 | 8  | 6  |
| -CKCP | 0.099811 | 1 | 4  | 6  |
| -CKCQ | 0.099811 | 1 | 4  | 1  |
| -CKCW | 0.099811 | 1 | 4  | 14 |
| -CKDH | 0.099811 | 2 | 8  | 12 |
| -CKEG | 0.099811 | 1 | 4  | 6  |
| -CKEM | 0.099811 | 1 | 4  | 2  |
| -CKEP | 0.099811 | 1 | 4  | 7  |
| -CKFC | 0.099811 | 1 | 4  | 15 |
| -CKFG | 0.099811 | 1 | 4  | 9  |
| -CKFH | 0.099811 | 1 | 4  | 8  |
| -CKFN | 0.099811 | 1 | 4  | 10 |
| -CKFR | 0.099811 | 1 | 4  | 29 |
| -CKGC | 0.099811 | 1 | 4  | 10 |
| -CKHF | 0.099811 | 1 | 4  | 12 |
| -CKHS | 0.099811 | 2 | 8  | 11 |
| -CKIE | 0.099811 | 1 | 4  | 4  |
| -CKIG | 0.099811 | 1 | 4  | 12 |
| -CKMS | 0.099811 | 1 | 4  | 18 |
| -CKNF | 0.099811 | 1 | 4  | 10 |
| -CKNQ | 0.099811 | 1 | 4  | 9  |
| -CKNW | 0.099811 | 1 | 4  | 9  |
| -CKPF | 0.099811 | 1 | 4  | 9  |
| -CKPK | 0.099811 | 1 | 4  | 11 |
| -CKQC | 0.099811 | 1 | 4  | 8  |
| -CKQG | 0.099811 | 1 | 4  | 8  |
| -CKQI | 0.099811 | 1 | 4  | 7  |
| -CKRD | 0.099811 | 1 | 4  | 9  |
| -CKRE | 0.099811 | 2 | 8  | 8  |
| -CKRS | 0.099811 | 4 | 16 | 59 |
| -CKSQ | 0.099811 | 1 | 4  | 10 |
| -CKTC | 0.099811 | 1 | 4  | 20 |
| -CKTF | 0.099811 | 1 | 4  | 14 |
| -CKTQ | 0.099811 | 1 | 4  | 14 |
| -CKTW | 0.099811 | 1 | 4  | 5  |
| -CKVI | 0.099811 | 1 | 4  | 17 |
| -CLAC | 0.099811 | 2 | 8  | 9  |
| -CLAG | 0.099811 | 4 | 16 | 29 |
| -CLAH | 0.099811 | 1 | 4  | 15 |
| -CLCK | 0.099811 | 1 | 4  | 16 |
| -CLDR | 0.099811 | 4 | 16 | 50 |
| -CLEC | 0.099811 | 1 | 4  | 16 |
| -CLEG | 0.099811 | 2 | 8  | 22 |
| -CLFP | 0.099811 | 1 | 4  | 36 |
| -CLFS | 0.099811 | 3 | 12 | 28 |
| -CLGH | 0.099811 | 2 | 8  | 17 |
| -CLKE | 0.099811 | 1 | 4  | 13 |
| -CLKG | 0.099811 | 4 | 16 | 31 |
| -CLMD | 0.099811 | 1 | 4  | 28 |
| -CLNY | 0.099811 | 2 | 8  | 27 |
| -CLPF | 0.099811 | 1 | 4  | 37 |
| -CLPM | 0.099811 | 2 | 8  | 33 |
| -CLRI | 0.099811 | 3 | 12 | 55 |
| -CLRW | 0.099811 | 3 | 12 | 56 |
| -CLSH | 0.099811 | 2 | 8  | 37 |
| -CLTY | 0.099811 | 2 | 8  | 39 |
| -CLVW | 0.099811 | 1 | 4  | 46 |

|       |          |   |    |    |
|-------|----------|---|----|----|
| -CLWG | 0.099811 | 1 | 4  | 39 |
| -CLYH | 0.099811 | 1 | 4  | 11 |
| -CMDQ | 0.099811 | 2 | 8  | 17 |
| -CMEN | 0.099811 | 1 | 4  | 6  |
| -CMER | 0.099811 | 2 | 8  | 12 |
| -CMGI | 0.099811 | 2 | 8  | 17 |
| -CMHA | 0.099811 | 1 | 4  | 6  |
| -CMHK | 0.099811 | 1 | 4  | 8  |
| -CMHL | 0.099811 | 1 | 4  | 22 |
| -CMKA | 0.099811 | 1 | 4  | 7  |
| -CMKK | 0.099811 | 1 | 4  | 6  |
| -CMKQ | 0.099811 | 1 | 4  | 21 |
| -CMLH | 0.099811 | 1 | 4  | 5  |
| -CMMK | 0.099811 | 1 | 4  | 11 |
| -CMMR | 0.099811 | 2 | 8  | 20 |
| -CMNP | 0.099811 | 2 | 8  | 8  |
| -CMNS | 0.099811 | 1 | 4  | 12 |
| -CMPE | 0.099811 | 2 | 8  | 13 |
| -CMPM | 0.099811 | 1 | 4  | 17 |
| -CMPN | 0.099811 | 1 | 4  | 20 |
| -CMPQ | 0.099811 | 1 | 4  | 15 |
| -CMQT | 0.099811 | 1 | 4  | 20 |
| -CMQV | 0.099811 | 1 | 4  | 14 |
| -CMQW | 0.099811 | 1 | 4  | 5  |
| -CMRR | 0.099811 | 1 | 4  | 31 |
| -CMTC | 0.099811 | 1 | 4  | 8  |
| -CMTK | 0.099811 | 2 | 8  | 26 |
| -CMYD | 0.099811 | 1 | 4  | 11 |
| -CMYL | 0.099811 | 1 | 4  | 24 |
| -CNAA | 0.099811 | 1 | 4  | 10 |
| -CNAD | 0.099811 | 1 | 4  | 10 |
| -CNAF | 0.099811 | 1 | 4  | 14 |
| -CNAQ | 0.099811 | 1 | 4  | 12 |
| -CNCN | 0.099811 | 1 | 4  | 9  |
| -CNEP | 0.099811 | 1 | 4  | 11 |
| -CNFV | 0.099811 | 1 | 4  | 19 |
| -CNGW | 0.099811 | 1 | 4  | 7  |
| -CNHY | 0.099811 | 1 | 4  | 7  |
| -CNID | 0.099811 | 2 | 8  | 16 |
| -CNIR | 0.099811 | 2 | 8  | 30 |
| -CNKG | 0.099811 | 1 | 4  | 17 |
| -CNKI | 0.099811 | 1 | 4  | 12 |
| -CNKL | 0.099811 | 3 | 12 | 40 |
| -CNKV | 0.099811 | 1 | 4  | 14 |
| -CNMD | 0.099811 | 1 | 4  | 11 |
| -CNMG | 0.099811 | 1 | 4  | 14 |
| -CNMS | 0.099811 | 1 | 4  | 33 |
| -CNMT | 0.099811 | 1 | 4  | 25 |
| -CNNC | 0.099811 | 1 | 4  | 9  |
| -CNNF | 0.099811 | 1 | 4  | 8  |
| -CNPA | 0.099811 | 2 | 8  | 25 |
| -CNPD | 0.099811 | 1 | 4  | 16 |
| -CNPK | 0.099811 | 1 | 4  | 6  |
| -CNPQ | 0.099811 | 1 | 4  | 10 |
| -CNQG | 0.099811 | 1 | 4  | 11 |
| -CNQS | 0.099811 | 3 | 12 | 24 |
| -CNQW | 0.099811 | 1 | 4  | 12 |

|        |          |   |    |    |
|--------|----------|---|----|----|
| -CNRV  | 0.099811 | 3 | 12 | 39 |
| -CNTW  | 0.099811 | 1 | 4  | 16 |
| -CNVK  | 0.099811 | 2 | 8  | 15 |
| -CNWM  | 0.099811 | 1 | 4  | 5  |
| -CNWQ  | 0.099811 | 1 | 4  | 16 |
| -CNYA  | 0.099811 | 1 | 4  | 15 |
| -CNYM  | 0.099811 | 1 | 4  | 12 |
| -CPAC  | 0.099811 | 2 | 8  | 18 |
| -CPCE  | 0.099811 | 1 | 4  | 12 |
| -CPCK  | 0.099811 | 1 | 4  | 20 |
| -CPCT  | 0.099811 | 2 | 8  | 18 |
| -CPCV  | 0.099811 | 2 | 8  | 22 |
| -CPDF  | 0.099811 | 1 | 4  | 7  |
| -CPDW  | 0.099811 | 1 | 4  | 12 |
| -CP EE | 0.099811 | 2 | 8  | 12 |
| -CPGD  | 0.099811 | 2 | 8  | 10 |
| -CPGM  | 0.099811 | 2 | 8  | 36 |
| -CPHC  | 0.099811 | 1 | 4  | 8  |
| -CPHV  | 0.099811 | 1 | 4  | 23 |
| -CPID  | 0.099811 | 1 | 4  | 7  |
| -CPIW  | 0.099811 | 1 | 4  | 16 |
| -CPMW  | 0.099811 | 1 | 4  | 23 |
| -CPNH  | 0.099811 | 2 | 8  | 26 |
| -CPNM  | 0.099811 | 3 | 12 | 27 |
| -CPNR  | 0.099811 | 2 | 8  | 30 |
| -CPNT  | 0.099811 | 1 | 4  | 18 |
| -CPNY  | 0.099811 | 1 | 4  | 13 |
| -CPPL  | 0.099811 | 2 | 8  | 37 |
| -CPPV  | 0.099811 | 2 | 8  | 38 |
| -CPQS  | 0.099811 | 1 | 4  | 16 |
| -CPSH  | 0.099811 | 1 | 4  | 27 |
| -CPTC  | 0.099811 | 2 | 8  | 19 |
| -CPTN  | 0.099811 | 2 | 8  | 26 |
| -CPVH  | 0.099811 | 1 | 4  | 17 |
| -CPVI  | 0.099811 | 1 | 4  | 21 |
| -CPVN  | 0.099811 | 1 | 4  | 19 |
| -CPWE  | 0.099811 | 1 | 4  | 5  |
| -CQAH  | 0.099811 | 1 | 4  | 8  |
| -CQAN  | 0.099811 | 1 | 4  | 5  |
| -CQAO  | 0.099811 | 1 | 4  | 22 |
| -CQAY  | 0.099811 | 1 | 4  | 9  |
| -CQCT  | 0.099811 | 1 | 4  | 8  |
| -CQDE  | 0.099811 | 1 | 4  | 9  |
| -CQER  | 0.099811 | 2 | 8  | 20 |
| -CQFA  | 0.099811 | 1 | 4  | 10 |
| -CQFS  | 0.099811 | 2 | 8  | 21 |
| -CQFW  | 0.099811 | 1 | 4  | 7  |
| -CQGQ  | 0.099811 | 1 | 4  | 18 |
| -CQHL  | 0.099811 | 1 | 4  | 14 |
| -CQHV  | 0.099811 | 1 | 4  | 8  |
| -CQIH  | 0.099811 | 1 | 4  | 23 |
| -CQIR  | 0.099811 | 1 | 4  | 17 |
| -CQKD  | 0.099811 | 1 | 4  | 3  |
| -CQKM  | 0.099811 | 1 | 4  | 16 |
| -CQLI  | 0.099811 | 1 | 4  | 23 |
| -CQLN  | 0.099811 | 1 | 4  | 14 |
| -CQME  | 0.099811 | 1 | 4  | 6  |

|       |          |   |    |    |
|-------|----------|---|----|----|
| -CQQI | 0.099811 | 1 | 4  | 3  |
| -CQQV | 0.099811 | 1 | 4  | 16 |
| -CQRG | 0.099811 | 1 | 4  | 14 |
| -CQRI | 0.099811 | 1 | 4  | 13 |
| -CQSH | 0.099811 | 1 | 4  | 10 |
| -CQST | 0.099811 | 4 | 16 | 31 |
| -CQVD | 0.099811 | 1 | 4  | 20 |
| -CQVW | 0.099811 | 1 | 4  | 9  |
| -CQWL | 0.099811 | 1 | 4  | 13 |
| -CQWS | 0.099811 | 1 | 4  | 19 |
| -CQWT | 0.099811 | 1 | 4  | 9  |
| -CRCL | 0.099811 | 2 | 8  | 37 |
| -CRDF | 0.099811 | 1 | 4  | 13 |
| -CREG | 0.099811 | 1 | 4  | 21 |
| -CREK | 0.099811 | 1 | 4  | 8  |
| -CRGC | 0.099811 | 3 | 12 | 19 |
| -CRGW | 0.099811 | 1 | 4  | 21 |
| -CRGY | 0.099811 | 1 | 4  | 18 |
| -CRIP | 0.099811 | 1 | 4  | 23 |
| -CRKD | 0.099811 | 2 | 8  | 15 |
| -CRLD | 0.099811 | 1 | 4  | 25 |
| -CRLY | 0.099811 | 1 | 4  | 28 |
| -CRNM | 0.099811 | 2 | 8  | 36 |
| -CRNT | 0.099811 | 2 | 8  | 30 |
| -CRPH | 0.099811 | 1 | 4  | 23 |
| -CRPK | 0.099811 | 1 | 4  | 24 |
| -CRRE | 0.099811 | 2 | 8  | 34 |
| -CRRF | 0.099811 | 1 | 4  | 39 |
| -CRRK | 0.099811 | 3 | 12 | 50 |
| -CRSH | 0.099811 | 2 | 8  | 31 |
| -CRSY | 0.099811 | 2 | 8  | 24 |
| -CRVW | 0.099811 | 2 | 8  | 49 |
| -CRWL | 0.099811 | 1 | 4  | 28 |
| -CSAQ | 0.099811 | 1 | 4  | 29 |
| -CSCY | 0.099811 | 1 | 4  | 17 |
| -CSFF | 0.099811 | 1 | 4  | 13 |
| -CSFV | 0.099811 | 2 | 8  | 36 |
| -CSGA | 0.099811 | 3 | 12 | 27 |
| -CSGF | 0.099811 | 1 | 4  | 21 |
| -CSGK | 0.099811 | 2 | 8  | 21 |
| -CSID | 0.099811 | 2 | 8  | 30 |
| -CSKY | 0.099811 | 1 | 4  | 19 |
| -CSMG | 0.099811 | 1 | 4  | 27 |
| -CSPI | 0.099811 | 2 | 8  | 24 |
| -CSQE | 0.099811 | 1 | 4  | 17 |
| -CSQT | 0.099811 | 2 | 8  | 28 |
| -CSRW | 0.099811 | 2 | 8  | 55 |
| -CSSE | 0.099811 | 3 | 12 | 50 |
| -CSTD | 0.099811 | 3 | 12 | 27 |
| -CSWS | 0.099811 | 3 | 12 | 63 |
| -CSYH | 0.099811 | 2 | 8  | 14 |
| -CTAA | 0.099811 | 2 | 8  | 19 |
| -CTAG | 0.099811 | 2 | 8  | 35 |
| -CTDD | 0.099811 | 2 | 8  | 18 |
| -CTEW | 0.099811 | 2 | 8  | 20 |
| -CTKM | 0.099811 | 1 | 4  | 17 |
| -CTKQ | 0.099811 | 1 | 4  | 14 |

|       |          |   |    |    |
|-------|----------|---|----|----|
| -CTLE | 0.099811 | 3 | 12 | 42 |
| -CTMY | 0.099811 | 1 | 4  | 19 |
| -CTNH | 0.099811 | 1 | 4  | 16 |
| -CTPP | 0.099811 | 2 | 8  | 22 |
| -CTQC | 0.099811 | 1 | 4  | 13 |
| -CTQL | 0.099811 | 2 | 8  | 33 |
| -CTRW | 0.099811 | 1 | 4  | 44 |
| -CTTR | 0.099811 | 6 | 24 | 56 |
| -CTYC | 0.099811 | 2 | 8  | 25 |
| -CTYF | 0.099811 | 1 | 4  | 6  |
| -CTYI | 0.099811 | 2 | 8  | 31 |
| -CVAY | 0.099811 | 1 | 4  | 12 |
| -CVCW | 0.099811 | 1 | 4  | 16 |
| -CVDI | 0.099811 | 1 | 4  | 10 |
| -CVDT | 0.099811 | 3 | 12 | 35 |
| -CVEF | 0.099811 | 2 | 8  | 23 |
| -VEH  | 0.099811 | 1 | 4  | 23 |
| -VEQ  | 0.099811 | 1 | 4  | 18 |
| -CVFE | 0.099811 | 1 | 4  | 16 |
| -CVFK | 0.099811 | 1 | 4  | 27 |
| -CVGY | 0.099811 | 1 | 4  | 13 |
| -CVHW | 0.099811 | 1 | 4  | 22 |
| -CVNE | 0.099811 | 1 | 4  | 20 |
| -CVPA | 0.099811 | 2 | 8  | 25 |
| -CVQP | 0.099811 | 1 | 4  | 17 |
| -CVRC | 0.099811 | 1 | 4  | 20 |
| -CVSQ | 0.099811 | 2 | 8  | 54 |
| -CVSW | 0.099811 | 3 | 12 | 42 |
| -CVVW | 0.099811 | 1 | 4  | 26 |
| -CVWK | 0.099811 | 1 | 4  | 20 |
| -CVWL | 0.099811 | 1 | 4  | 32 |
| -CVWR | 0.099811 | 1 | 4  | 35 |
| -CVWW | 0.099811 | 1 | 4  | 14 |
| -CVYE | 0.099811 | 1 | 4  | 10 |
| -CVYG | 0.099811 | 1 | 4  | 9  |
| -CWAP | 0.099811 | 1 | 4  | 10 |
| -CWAR | 0.099811 | 1 | 4  | 11 |
| -CWCD | 0.099811 | 1 | 4  | 11 |
| -CWDI | 0.099811 | 1 | 4  | 7  |
| -CWDT | 0.099811 | 1 | 4  | 9  |
| -CWEG | 0.099811 | 1 | 4  | 4  |
| -CWEP | 0.099811 | 1 | 4  | 7  |
| -CWGE | 0.099811 | 1 | 4  | 9  |
| -CWGY | 0.099811 | 1 | 4  | 9  |
| -CWKA | 0.099811 | 1 | 4  | 7  |
| -CWKC | 0.099811 | 1 | 4  | 11 |
| -CWKE | 0.099811 | 1 | 4  | 6  |
| -CWKH | 0.099811 | 1 | 4  | 9  |
| -CWKN | 0.099811 | 1 | 4  | 9  |
| -CWKS | 0.099811 | 1 | 4  | 15 |
| -CWKY | 0.099811 | 1 | 4  | 10 |
| -CWLE | 0.099811 | 1 | 4  | 26 |
| -CWLG | 0.099811 | 1 | 4  | 23 |
| -CWLH | 0.099811 | 1 | 4  | 9  |
| -CWLK | 0.099811 | 1 | 4  | 12 |
| -CWNA | 0.099811 | 1 | 4  | 17 |
| -CWNG | 0.099811 | 1 | 4  | 10 |



|       |          |   |    |     |
|-------|----------|---|----|-----|
| -CWPL | 0.099811 | 1 | 4  | 42  |
| -CWPR | 0.099811 | 1 | 4  | 22  |
| -CWQA | 0.099811 | 1 | 4  | 5   |
| -CWQN | 0.099811 | 1 | 4  | 7   |
| -CWTD | 0.099811 | 1 | 4  | 13  |
| -CWWK | 0.099811 | 1 | 4  | 14  |
| -CWWY | 0.099811 | 1 | 4  | 8   |
| -CWYM | 0.099811 | 2 | 8  | 8   |
| -CYAH | 0.099811 | 1 | 4  | 11  |
| -CYAK | 0.099811 | 2 | 8  | 25  |
| -CYAN | 0.099811 | 1 | 4  | 19  |
| -CYAW | 0.099811 | 1 | 4  | 16  |
| -CYDA | 0.099811 | 2 | 8  | 13  |
| -CYDW | 0.099811 | 1 | 4  | 9   |
| -CYEF | 0.099811 | 1 | 4  | 12  |
| -CYEH | 0.099811 | 3 | 12 | 19  |
| -CYEW | 0.099811 | 1 | 4  | 11  |
| -CYFT | 0.099811 | 1 | 4  | 11  |
| -CYGG | 0.099811 | 1 | 4  | 20  |
| -CYGK | 0.099811 | 1 | 4  | 5   |
| -CYHK | 0.099811 | 1 | 4  | 11  |
| -CYIE | 0.099811 | 1 | 4  | 8   |
| -CYIH | 0.099811 | 1 | 4  | 8   |
| -CYIW | 0.099811 | 1 | 4  | 15  |
| -CYKD | 0.099811 | 1 | 4  | 13  |
| -CYKF | 0.099811 | 1 | 4  | 11  |
| -CYKQ | 0.099811 | 1 | 4  | 9   |
| -CYKR | 0.099811 | 1 | 4  | 22  |
| -CYKT | 0.099811 | 1 | 4  | 11  |
| -CYLW | 0.099811 | 1 | 4  | 28  |
| -CYME | 0.099811 | 1 | 4  | 12  |
| -CYNK | 0.099811 | 1 | 4  | 16  |
| -CYP5 | 0.099811 | 1 | 4  | 36  |
| -CYPT | 0.099811 | 1 | 4  | 18  |
| -CYPY | 0.099811 | 1 | 4  | 16  |
| -CYRD | 0.099811 | 1 | 4  | 19  |
| -CYSW | 0.099811 | 1 | 4  | 17  |
| -CYTC | 0.099811 | 1 | 4  | 5   |
| -CYTK | 0.099811 | 2 | 8  | 12  |
| -CYWE | 0.099811 | 1 | 4  | 3   |
| -CYYG | 0.099811 | 1 | 4  | 28  |
| -CYYH | 0.099811 | 1 | 4  | 12  |
| -CYYT | 0.099811 | 1 | 4  | 6   |
| -CGNL | 0.099811 | 5 | 20 | 30  |
| -CIRS | 0.099811 | 5 | 20 | 60  |
| -CQSR | 0.099811 | 5 | 20 | 50  |
| -CTSR | 0.10303  | 8 | 31 | 107 |
| -CLSD | 0.10351  | 7 | 27 | 35  |
| -CDCG | 0.10506  | 5 | 19 | 21  |
| -CDSP | 0.10506  | 5 | 19 | 39  |
| -CGAL | 0.10506  | 5 | 19 | 38  |
| -CGSV | 0.10506  | 5 | 19 | 30  |
| -CIDV | 0.10506  | 5 | 19 | 24  |
| -CQVL | 0.10506  | 5 | 19 | 39  |
| -CSDG | 0.10506  | 5 | 19 | 36  |
| -CKLS | 0.10568  | 9 | 34 | 71  |
| -CCAS | 0.10647  | 4 | 15 | 48  |

|       |         |    |    |    |
|-------|---------|----|----|----|
| -CGNI | 0.10647 | 4  | 15 | 22 |
| -CNLR | 0.10647 | 4  | 15 | 72 |
| -CPGS | 0.10647 | 4  | 15 | 44 |
| -CPRA | 0.10647 | 4  | 15 | 31 |
| -CSDK | 0.10647 | 4  | 15 | 28 |
| -CSDM | 0.10647 | 4  | 15 | 29 |
| -CTEL | 0.10647 | 4  | 15 | 43 |
| -CTHL | 0.10647 | 4  | 15 | 37 |
| -CYPR | 0.10647 | 4  | 15 | 29 |
| -CADL | 0.10889 | 3  | 11 | 34 |
| -CAQV | 0.10889 | 3  | 11 | 40 |
| -CATK | 0.10889 | 3  | 11 | 38 |
| -CAVE | 0.10889 | 3  | 11 | 18 |
| -CCDP | 0.10889 | 3  | 11 | 11 |
| -CCRS | 0.10889 | 3  | 11 | 57 |
| -CFRT | 0.10889 | 3  | 11 | 41 |
| -CGTG | 0.10889 | 3  | 11 | 30 |
| -CLAW | 0.10889 | 3  | 11 | 44 |
| -CLMP | 0.10889 | 3  | 11 | 43 |
| -CLPD | 0.10889 | 3  | 11 | 12 |
| -CMSK | 0.10889 | 3  | 11 | 36 |
| -CPSQ | 0.10889 | 3  | 11 | 31 |
| -CPSW | 0.10889 | 3  | 11 | 35 |
| -CPVT | 0.10889 | 3  | 11 | 37 |
| -CRCD | 0.10889 | 3  | 11 | 25 |
| -CRGL | 0.10889 | 6  | 22 | 72 |
| -CRGN | 0.10889 | 3  | 11 | 34 |
| -CRLE | 0.10889 | 3  | 11 | 56 |
| -CRNL | 0.10889 | 3  | 11 | 52 |
| -CRPT | 0.10889 | 3  | 11 | 48 |
| -CRSD | 0.10889 | 3  | 11 | 45 |
| -CRTN | 0.10889 | 6  | 22 | 58 |
| -CSAA | 0.10889 | 3  | 11 | 38 |
| -CSCV | 0.10889 | 3  | 11 | 42 |
| -CSFL | 0.10889 | 3  | 11 | 43 |
| -CSQW | 0.10889 | 3  | 11 | 9  |
| -CSRE | 0.10889 | 3  | 11 | 46 |
| -CTAV | 0.10889 | 3  | 11 | 39 |
| -CTFL | 0.10889 | 3  | 11 | 36 |
| -CTKP | 0.10889 | 3  | 11 | 32 |
| -CTTT | 0.10889 | 3  | 11 | 44 |
| -CVPE | 0.10889 | 3  | 11 | 38 |
| -CVTK | 0.10889 | 3  | 11 | 27 |
| -CVYL | 0.10889 | 3  | 11 | 38 |
| -CWTS | 0.10889 | 3  | 11 | 37 |
| -CLSG | 0.1109  | 5  | 18 | 62 |
| -CRVP | 0.1109  | 5  | 18 | 54 |
| -CAST | 0.11179 | 7  | 25 | 57 |
| -CSMS | 0.11207 | 16 | 57 | 68 |
| -CASS | 0.11261 | 11 | 39 | 84 |
| -CAAT | 0.11407 | 2  | 7  | 44 |
| -CAPR | 0.11407 | 2  | 7  | 40 |
| -CAQE | 0.11407 | 2  | 7  | 16 |
| -CAQG | 0.11407 | 2  | 7  | 9  |
| -CARD | 0.11407 | 2  | 7  | 17 |
| -CARF | 0.11407 | 2  | 7  | 29 |
| -CCPD | 0.11407 | 2  | 7  | 18 |

|       |         |   |    |    |
|-------|---------|---|----|----|
| -CCRI | 0.11407 | 2 | 7  | 19 |
| -CCSL | 0.11407 | 4 | 14 | 45 |
| -CCVR | 0.11407 | 4 | 14 | 50 |
| -CDAD | 0.11407 | 2 | 7  | 10 |
| -CDAV | 0.11407 | 2 | 7  | 23 |
| -CDDA | 0.11407 | 2 | 7  | 11 |
| -CDGW | 0.11407 | 2 | 7  | 6  |
| -CDHR | 0.11407 | 4 | 14 | 38 |
| -CDLN | 0.11407 | 4 | 14 | 28 |
| -CDPN | 0.11407 | 2 | 7  | 28 |
| -CDPY | 0.11407 | 2 | 7  | 10 |
| -CDRF | 0.11407 | 2 | 7  | 10 |
| -CDWS | 0.11407 | 2 | 7  | 34 |
| -CEGG | 0.11407 | 2 | 7  | 10 |
| -CEGY | 0.11407 | 2 | 7  | 7  |
| -CENA | 0.11407 | 2 | 7  | 6  |
| -CFAG | 0.11407 | 2 | 7  | 13 |
| -CFGS | 0.11407 | 2 | 7  | 19 |
| -CFLG | 0.11407 | 2 | 7  | 29 |
| -CFPG | 0.11407 | 2 | 7  | 26 |
| -CFRA | 0.11407 | 2 | 7  | 25 |
| -CFYS | 0.11407 | 2 | 7  | 30 |
| -CGFF | 0.11407 | 2 | 7  | 12 |
| -CGFV | 0.11407 | 2 | 7  | 36 |
| -CGGG | 0.11407 | 2 | 7  | 18 |
| -CGNT | 0.11407 | 2 | 7  | 23 |
| -CGNW | 0.11407 | 2 | 7  | 18 |
| -CGPN | 0.11407 | 2 | 7  | 23 |
| -CGRS | 0.11407 | 4 | 14 | 75 |
| -CHDQ | 0.11407 | 2 | 7  | 23 |
| -CHPN | 0.11407 | 2 | 7  | 19 |
| -CHSF | 0.11407 | 2 | 7  | 25 |
| -CHTR | 0.11407 | 2 | 7  | 21 |
| -CIAV | 0.11407 | 2 | 7  | 19 |
| -CIFR | 0.11407 | 2 | 7  | 23 |
| -CIGQ | 0.11407 | 2 | 7  | 19 |
| -CIGV | 0.11407 | 4 | 14 | 26 |
| -CIPG | 0.11407 | 2 | 7  | 15 |
| -CIRR | 0.11407 | 4 | 14 | 65 |
| -CITL | 0.11407 | 2 | 7  | 28 |
| -CIVP | 0.11407 | 4 | 14 | 19 |
| -CKDL | 0.11407 | 2 | 7  | 11 |
| -CKDQ | 0.11407 | 2 | 7  | 6  |
| -CLDL | 0.11407 | 8 | 28 | 68 |
| -CLDT | 0.11407 | 4 | 14 | 21 |
| -CLFL | 0.11407 | 2 | 7  | 52 |
| -CLLI | 0.11407 | 4 | 14 | 49 |
| -CLPW | 0.11407 | 2 | 7  | 46 |
| -CLRC | 0.11407 | 2 | 7  | 33 |
| -CLVP | 0.11407 | 4 | 14 | 45 |
| -CMAP | 0.11407 | 2 | 7  | 13 |
| -CMHR | 0.11407 | 2 | 7  | 30 |
| -CMHT | 0.11407 | 2 | 7  | 32 |
| -CMPI | 0.11407 | 2 | 7  | 13 |
| -CMTI | 0.11407 | 2 | 7  | 6  |
| -CMVL | 0.11407 | 2 | 7  | 29 |
| -CMYE | 0.11407 | 2 | 7  | 19 |

|       |         |    |    |     |
|-------|---------|----|----|-----|
| -CNAS | 0.11407 | 4  | 14 | 35  |
| -CNDQ | 0.11407 | 2  | 7  | 8   |
| -CNGH | 0.11407 | 2  | 7  | 10  |
| -CNKY | 0.11407 | 2  | 7  | 15  |
| -CNLD | 0.11407 | 2  | 7  | 22  |
| -CNTN | 0.11407 | 2  | 7  | 25  |
| -CPAN | 0.11407 | 2  | 7  | 16  |
| -CPIK | 0.11407 | 2  | 7  | 18  |
| -CPQL | 0.11407 | 2  | 7  | 34  |
| -CPRF | 0.11407 | 2  | 7  | 27  |
| -CPVD | 0.11407 | 2  | 7  | 18  |
| -CPYF | 0.11407 | 2  | 7  | 3   |
| -CQDI | 0.11407 | 2  | 7  | 14  |
| -CQGK | 0.11407 | 2  | 7  | 17  |
| -CQIP | 0.11407 | 2  | 7  | 11  |
| -CREP | 0.11407 | 2  | 7  | 22  |
| -CRGK | 0.11407 | 2  | 7  | 32  |
| -CRGR | 0.11407 | 2  | 7  | 38  |
| -CRMD | 0.11407 | 2  | 7  | 24  |
| -CRNN | 0.11407 | 2  | 7  | 45  |
| -CRWV | 0.11407 | 2  | 7  | 31  |
| -CSCD | 0.11407 | 2  | 7  | 12  |
| -CSEG | 0.11407 | 2  | 7  | 22  |
| -CSMA | 0.11407 | 4  | 14 | 35  |
| -CSRP | 0.11407 | 4  | 14 | 64  |
| -CSVW | 0.11407 | 2  | 7  | 29  |
| -CSYE | 0.11407 | 2  | 7  | 17  |
| -CSYG | 0.11407 | 2  | 7  | 23  |
| -CTDP | 0.11407 | 4  | 14 | 22  |
| -CTGA | 0.11407 | 2  | 7  | 13  |
| -CTGR | 0.11407 | 2  | 7  | 40  |
| -CTQV | 0.11407 | 2  | 7  | 28  |
| -CVKG | 0.11407 | 2  | 7  | 24  |
| -CVNH | 0.11407 | 2  | 7  | 11  |
| -CVYH | 0.11407 | 2  | 7  | 16  |
| -CWCK | 0.11407 | 2  | 7  | 9   |
| -CWDK | 0.11407 | 2  | 7  | 8   |
| -CWLТ | 0.11407 | 2  | 7  | 23  |
| -CWNS | 0.11407 | 2  | 7  | 12  |
| -CWRV | 0.11407 | 2  | 7  | 45  |
| -CYDV | 0.11407 | 2  | 7  | 18  |
| -CYEN | 0.11407 | 2  | 7  | 26  |
| -CYGD | 0.11407 | 2  | 7  | 17  |
| -CYGF | 0.11407 | 2  | 7  | 5   |
| -CYQR | 0.11407 | 2  | 7  | 24  |
| -CYYL | 0.11407 | 2  | 7  | 20  |
| -CRSA | 0.11407 | 12 | 42 | 71  |
| -CSGS | 0.11407 | 6  | 21 | 85  |
| -CVLL | 0.11591 | 9  | 31 | 128 |
| -CDAT | 0.11645 | 7  | 24 | 34  |
| -CQSS | 0.11645 | 7  | 24 | 54  |
| -CDPR | 0.11743 | 5  | 17 | 21  |
| -CNRL | 0.11743 | 5  | 17 | 64  |
| -CRTP | 0.11743 | 5  | 17 | 54  |
| -CTSL | 0.11743 | 15 | 51 | 96  |
| -CTVG | 0.11743 | 5  | 17 | 32  |
| -CACP | 0.11977 | 3  | 10 | 24  |

|       |         |    |    |     |
|-------|---------|----|----|-----|
| -CAIP | 0.11977 | 3  | 10 | 13  |
| -CATS | 0.11977 | 3  | 10 | 78  |
| -CDA  | 0.11977 | 3  | 10 | 13  |
| -CELH | 0.11977 | 3  | 10 | 17  |
| -CEVW | 0.11977 | 3  | 10 | 20  |
| -CFSG | 0.11977 | 3  | 10 | 27  |
| -CFSH | 0.11977 | 3  | 10 | 19  |
| -CFVR | 0.11977 | 3  | 10 | 26  |
| -CGRP | 0.11977 | 3  | 10 | 35  |
| -CHKV | 0.11977 | 3  | 10 | 22  |
| -CHRV | 0.11977 | 3  | 10 | 35  |
| -CIRH | 0.11977 | 3  | 10 | 26  |
| -CIRL | 0.11977 | 3  | 10 | 35  |
| -CIRP | 0.11977 | 3  | 10 | 38  |
| -CLHV | 0.11977 | 3  | 10 | 37  |
| -CLVI | 0.11977 | 3  | 10 | 47  |
| -CMRT | 0.11977 | 3  | 10 | 38  |
| -CNAY | 0.11977 | 3  | 10 | 28  |
| -CNMR | 0.11977 | 3  | 10 | 31  |
| -CNRA | 0.11977 | 3  | 10 | 31  |
| -CPRC | 0.11977 | 3  | 10 | 27  |
| -CQRS | 0.11977 | 6  | 20 | 43  |
| -CRAN | 0.11977 | 3  | 10 | 28  |
| -CRED | 0.11977 | 3  | 10 | 17  |
| -CRKV | 0.11977 | 3  | 10 | 23  |
| -CRSE | 0.11977 | 3  | 10 | 62  |
| -CSMY | 0.11977 | 3  | 10 | 35  |
| -CSWP | 0.11977 | 3  | 10 | 32  |
| -CTMI | 0.11977 | 3  | 10 | 23  |
| -CVCE | 0.11977 | 3  | 10 | 21  |
| -CVET | 0.11977 | 3  | 10 | 23  |
| -CVNP | 0.11977 | 3  | 10 | 23  |
| -CWEL | 0.11977 | 3  | 10 | 27  |
| -CWPS | 0.11977 | 3  | 10 | 30  |
| -CWTP | 0.11977 | 3  | 10 | 18  |
| -CYRK | 0.11977 | 3  | 10 | 38  |
| -CDLS | 0.12041 | 19 | 63 | 79  |
| -CDRL | 0.12151 | 7  | 23 | 60  |
| -CMKN | 0.12151 | 7  | 23 | 25  |
| -CSST | 0.12284 | 12 | 39 | 122 |
| -CISS | 0.12284 | 4  | 13 | 48  |
| -CKAA | 0.12284 | 4  | 13 | 34  |
| -CLGR | 0.12284 | 8  | 26 | 61  |
| -CMAV | 0.12284 | 4  | 13 | 32  |
| -CNLL | 0.12284 | 4  | 13 | 53  |
| -CQSM | 0.12284 | 4  | 13 | 19  |
| -CRMS | 0.12284 | 4  | 13 | 37  |
| -CRYR | 0.12284 | 4  | 13 | 56  |
| -CSEA | 0.12284 | 4  | 13 | 21  |
| -CSGQ | 0.12284 | 4  | 13 | 29  |
| -CSNF | 0.12284 | 4  | 13 | 23  |
| -CSRC | 0.12284 | 4  | 13 | 46  |
| -CSTC | 0.12284 | 4  | 13 | 26  |
| -CCSV | 0.12476 | 5  | 16 | 36  |
| -CELY | 0.12476 | 5  | 16 | 13  |
| -CGSI | 0.12476 | 5  | 16 | 33  |
| -CMNI | 0.12476 | 5  | 16 | 26  |

|       |         |    |    |    |
|-------|---------|----|----|----|
| -CVNL | 0.12476 | 5  | 16 | 44 |
| -CASM | 0.12608 | 6  | 19 | 39 |
| -CDRP | 0.12608 | 6  | 19 | 49 |
| -CKSK | 0.12608 | 6  | 19 | 23 |
| -CSSP | 0.12608 | 6  | 19 | 81 |
| -CTFV | 0.12608 | 6  | 19 | 21 |
| -CRVR | 0.12703 | 7  | 22 | 80 |
| -CVMP | 0.12703 | 7  | 22 | 41 |
| -CDHL | 0.12879 | 10 | 31 | 41 |
| -CAAD | 0.13308 | 1  | 3  | 18 |
| -CACE | 0.13308 | 1  | 3  | 7  |
| -CADC | 0.13308 | 1  | 3  | 11 |
| -CADQ | 0.13308 | 1  | 3  | 10 |
| -CAFC | 0.13308 | 1  | 3  | 8  |
| -CAFK | 0.13308 | 1  | 3  | 15 |
| -CAFL | 0.13308 | 1  | 3  | 20 |
| -CAFN | 0.13308 | 2  | 6  | 18 |
| -CAFY | 0.13308 | 1  | 3  | 12 |
| -CAHD | 0.13308 | 2  | 6  | 7  |
| -CAHF | 0.13308 | 1  | 3  | 11 |
| -CAHK | 0.13308 | 1  | 3  | 7  |
| -CAKF | 0.13308 | 1  | 3  | 14 |
| -CALV | 0.13308 | 8  | 24 | 70 |
| -CAMI | 0.13308 | 1  | 3  | 12 |
| -CAMT | 0.13308 | 2  | 6  | 22 |
| -CANC | 0.13308 | 1  | 3  | 12 |
| -CANF | 0.13308 | 1  | 3  | 17 |
| -CANQ | 0.13308 | 1  | 3  | 17 |
| -CAPG | 0.13308 | 2  | 6  | 20 |
| -CAPK | 0.13308 | 1  | 3  | 14 |
| -CAPP | 0.13308 | 1  | 3  | 19 |
| -CASW | 0.13308 | 2  | 6  | 34 |
| -CATC | 0.13308 | 1  | 3  | 23 |
| -CAVW | 0.13308 | 1  | 3  | 17 |
| -CAWA | 0.13308 | 1  | 3  | 10 |
| -CAWG | 0.13308 | 1  | 3  | 16 |
| -CAWI | 0.13308 | 1  | 3  | 7  |
| -CAWL | 0.13308 | 1  | 3  | 22 |
| -CAWY | 0.13308 | 1  | 3  | 12 |
| -CCAE | 0.13308 | 2  | 6  | 18 |
| -CCCP | 0.13308 | 1  | 3  | 2  |
| -CCDG | 0.13308 | 1  | 3  | 15 |
| -CCDW | 0.13308 | 1  | 3  | 7  |
| -CCEF | 0.13308 | 1  | 3  | 6  |
| -CCEH | 0.13308 | 2  | 6  | 21 |
| -CCEQ | 0.13308 | 1  | 3  | 10 |
| -CCFY | 0.13308 | 1  | 3  | 11 |
| -CCGF | 0.13308 | 1  | 3  | 9  |
| -CCGG | 0.13308 | 1  | 3  | 12 |
| -CCGK | 0.13308 | 2  | 6  | 30 |
| -CCGM | 0.13308 | 1  | 3  | 7  |
| -CCHH | 0.13308 | 1  | 3  | 8  |
| -CCHT | 0.13308 | 2  | 6  | 11 |
| -CCKD | 0.13308 | 1  | 3  | 8  |
| -CCKN | 0.13308 | 1  | 3  | 9  |
| -CCKP | 0.13308 | 1  | 3  | 22 |
| -CCLV | 0.13308 | 2  | 6  | 34 |

|       |         |   |   |    |
|-------|---------|---|---|----|
| -CCMK | 0.13308 | 1 | 3 | 12 |
| -CCMV | 0.13308 | 1 | 3 | 14 |
| -CCMW | 0.13308 | 1 | 3 | 15 |
| -CCNQ | 0.13308 | 1 | 3 | 12 |
| -CCPP | 0.13308 | 1 | 3 | 8  |
| -CCPT | 0.13308 | 2 | 6 | 28 |
| -CCPY | 0.13308 | 1 | 3 | 12 |
| -CCQT | 0.13308 | 1 | 3 | 18 |
| -CCQY | 0.13308 | 1 | 3 | 2  |
| -CCRE | 0.13308 | 1 | 3 | 12 |
| -CCRN | 0.13308 | 1 | 3 | 22 |
| -CCSH | 0.13308 | 1 | 3 | 8  |
| -CCSP | 0.13308 | 1 | 3 | 15 |
| -CCTK | 0.13308 | 1 | 3 | 27 |
| -CCTR | 0.13308 | 1 | 3 | 26 |
| -CCWN | 0.13308 | 1 | 3 | 8  |
| -CCWR | 0.13308 | 1 | 3 | 13 |
| -CCYD | 0.13308 | 1 | 3 | 12 |
| -CCYT | 0.13308 | 1 | 3 | 5  |
| -CDCA | 0.13308 | 1 | 3 | 8  |
| -CDCE | 0.13308 | 1 | 3 | 6  |
| -CDDG | 0.13308 | 2 | 6 | 11 |
| -CDDN | 0.13308 | 1 | 3 | 11 |
| -CDEH | 0.13308 | 1 | 3 | 6  |
| -CDEV | 0.13308 | 2 | 6 | 17 |
| -CDID | 0.13308 | 1 | 3 | 7  |
| -CDIH | 0.13308 | 1 | 3 | 7  |
| -CDKD | 0.13308 | 1 | 3 | 9  |
| -CDMK | 0.13308 | 1 | 3 | 12 |
| -CDMN | 0.13308 | 1 | 3 | 7  |
| -CDMQ | 0.13308 | 1 | 3 | 15 |
| -CDMW | 0.13308 | 1 | 3 | 6  |
| -CDNA | 0.13308 | 1 | 3 | 8  |
| -CDNC | 0.13308 | 1 | 3 | 6  |
| -CDNK | 0.13308 | 2 | 6 | 17 |
| -CDNT | 0.13308 | 1 | 3 | 14 |
| -CDQC | 0.13308 | 1 | 3 | 7  |
| -CDQL | 0.13308 | 1 | 3 | 23 |
| -CDQP | 0.13308 | 1 | 3 | 12 |
| -CDTP | 0.13308 | 2 | 6 | 11 |
| -CDYD | 0.13308 | 1 | 3 | 14 |
| -CDYK | 0.13308 | 2 | 6 | 11 |
| -CEAA | 0.13308 | 2 | 6 | 7  |
| -CEAH | 0.13308 | 1 | 3 | 12 |
| -CEAY | 0.13308 | 1 | 3 | 12 |
| -CECN | 0.13308 | 1 | 3 | 4  |
| -CECQ | 0.13308 | 1 | 3 | 6  |
| -CECS | 0.13308 | 2 | 6 | 16 |
| -CEDH | 0.13308 | 2 | 6 | 18 |
| -CEDI | 0.13308 | 1 | 3 | 7  |
| -CEDW | 0.13308 | 1 | 3 | 7  |
| -CEEA | 0.13308 | 1 | 3 | 3  |
| -CEEH | 0.13308 | 1 | 3 | 6  |
| -CEEM | 0.13308 | 1 | 3 | 6  |
| -CEFN | 0.13308 | 1 | 3 | 9  |
| -CEGA | 0.13308 | 1 | 3 | 10 |
| -CEGI | 0.13308 | 1 | 3 | 14 |

|       |         |   |   |    |
|-------|---------|---|---|----|
| -CEHK | 0.13308 | 1 | 3 | 11 |
| -CEHM | 0.13308 | 1 | 3 | 11 |
| -CEHV | 0.13308 | 2 | 6 | 12 |
| -CEMP | 0.13308 | 1 | 3 | 12 |
| -CEMQ | 0.13308 | 1 | 3 | 9  |
| -CENC | 0.13308 | 1 | 3 | 9  |
| -CEND | 0.13308 | 2 | 6 | 10 |
| -CENF | 0.13308 | 1 | 3 | 10 |
| -CENG | 0.13308 | 1 | 3 | 26 |
| -CENM | 0.13308 | 1 | 3 | 14 |
| -CENQ | 0.13308 | 1 | 3 | 5  |
| -CEQA | 0.13308 | 1 | 3 | 11 |
| -CEQG | 0.13308 | 1 | 3 | 7  |
| -CEQI | 0.13308 | 1 | 3 | 3  |
| -CEQS | 0.13308 | 1 | 3 | 19 |
| -CEQT | 0.13308 | 1 | 3 | 7  |
| -CERF | 0.13308 | 1 | 3 | 12 |
| -CESI | 0.13308 | 2 | 6 | 12 |
| -CETA | 0.13308 | 2 | 6 | 11 |
| -CETE | 0.13308 | 1 | 3 | 14 |
| -CETI | 0.13308 | 1 | 3 | 4  |
| -CEVT | 0.13308 | 2 | 6 | 22 |
| -CEWE | 0.13308 | 1 | 3 | 3  |
| -CEYA | 0.13308 | 1 | 3 | 8  |
| -CEYP | 0.13308 | 1 | 3 | 24 |
| -CEYQ | 0.13308 | 1 | 3 | 8  |
| -CEYY | 0.13308 | 1 | 3 | 12 |
| -CFAA | 0.13308 | 1 | 3 | 28 |
| -CFAD | 0.13308 | 1 | 3 | 17 |
| -CFAF | 0.13308 | 1 | 3 | 15 |
| -CFAH | 0.13308 | 1 | 3 | 10 |
| -CFAM | 0.13308 | 2 | 6 | 17 |
| -CFCH | 0.13308 | 1 | 3 | 4  |
| -CFCL | 0.13308 | 2 | 6 | 19 |
| -CFCS | 0.13308 | 1 | 3 | 9  |
| -CFDF | 0.13308 | 1 | 3 | 6  |
| -CFDP | 0.13308 | 1 | 3 | 5  |
| -CFDQ | 0.13308 | 1 | 3 | 3  |
| -CFFG | 0.13308 | 1 | 3 | 12 |
| -CFFK | 0.13308 | 1 | 3 | 12 |
| -CFFL | 0.13308 | 1 | 3 | 22 |
| -CFHC | 0.13308 | 1 | 3 | 8  |
| -CFHE | 0.13308 | 1 | 3 | 9  |
| -CFHV | 0.13308 | 2 | 6 | 21 |
| -CFIP | 0.13308 | 2 | 6 | 10 |
| -CFKD | 0.13308 | 1 | 3 | 9  |
| -CFKP | 0.13308 | 1 | 3 | 6  |
| -CFLW | 0.13308 | 1 | 3 | 31 |
| -CFLY | 0.13308 | 1 | 3 | 5  |
| -CFMD | 0.13308 | 1 | 3 | 4  |
| -CFMH | 0.13308 | 1 | 3 | 6  |
| -CFMK | 0.13308 | 1 | 3 | 10 |
| -CFMN | 0.13308 | 1 | 3 | 6  |
| -CFMP | 0.13308 | 1 | 3 | 19 |
| -CFNF | 0.13308 | 1 | 3 | 4  |
| -CFNL | 0.13308 | 2 | 6 | 32 |
| -CFNM | 0.13308 | 1 | 3 | 19 |



|       |         |   |   |    |
|-------|---------|---|---|----|
| -CFNN | 0.13308 | 1 | 3 | 4  |
| -CFNQ | 0.13308 | 1 | 3 | 10 |
| -CFNT | 0.13308 | 1 | 3 | 12 |
| -CFPM | 0.13308 | 1 | 3 | 21 |
| -CFQM | 0.13308 | 1 | 3 | 5  |
| -CFRF | 0.13308 | 1 | 3 | 23 |
| -CFRI | 0.13308 | 1 | 3 | 6  |
| -CFRM | 0.13308 | 1 | 3 | 17 |
| -CFRN | 0.13308 | 2 | 6 | 35 |
| -CFSF | 0.13308 | 1 | 3 | 17 |
| -CFTD | 0.13308 | 1 | 3 | 2  |
| -CFVW | 0.13308 | 1 | 3 | 4  |
| -CFWA | 0.13308 | 1 | 3 | 11 |
| -CFWP | 0.13308 | 1 | 3 | 22 |
| -CFWR | 0.13308 | 1 | 3 | 15 |
| -CFYE | 0.13308 | 1 | 3 | 13 |
| -CGAC | 0.13308 | 1 | 3 | 15 |
| -CGCI | 0.13308 | 1 | 3 | 14 |
| -CGCP | 0.13308 | 2 | 6 | 7  |
| -CGCV | 0.13308 | 2 | 6 | 24 |
| -CGDD | 0.13308 | 1 | 3 | 7  |
| -CGEG | 0.13308 | 2 | 6 | 17 |
| -CGEK | 0.13308 | 1 | 3 | 19 |
| -CGEQ | 0.13308 | 1 | 3 | 5  |
| -CGFG | 0.13308 | 2 | 6 | 11 |
| -CGGK | 0.13308 | 2 | 6 | 14 |
| -CGHY | 0.13308 | 1 | 3 | 9  |
| -CGIN | 0.13308 | 2 | 6 | 7  |
| -CGIR | 0.13308 | 2 | 6 | 33 |
| -CGKE | 0.13308 | 1 | 3 | 15 |
| -CGKQ | 0.13308 | 1 | 3 | 6  |
| -CGLW | 0.13308 | 1 | 3 | 30 |
| -CGMC | 0.13308 | 2 | 6 | 10 |
| -CGMP | 0.13308 | 2 | 6 | 29 |
| -CGMQ | 0.13308 | 1 | 3 | 11 |
| -CGNG | 0.13308 | 2 | 6 | 10 |
| -CGNY | 0.13308 | 1 | 3 | 8  |
| -CGPE | 0.13308 | 2 | 6 | 18 |
| -CGPK | 0.13308 | 1 | 3 | 11 |
| -CGPV | 0.13308 | 2 | 6 | 20 |
| -CGQH | 0.13308 | 2 | 6 | 7  |
| -CGRK | 0.13308 | 2 | 6 | 21 |
| -CGTC | 0.13308 | 1 | 3 | 10 |
| -CGTM | 0.13308 | 2 | 6 | 45 |
| -CGWA | 0.13308 | 1 | 3 | 12 |
| -CGWE | 0.13308 | 1 | 3 | 9  |
| -CGWK | 0.13308 | 1 | 3 | 13 |
| -CGWT | 0.13308 | 1 | 3 | 16 |
| -CGYF | 0.13308 | 1 | 3 | 9  |
| -CGYI | 0.13308 | 1 | 3 | 10 |
| -CGYM | 0.13308 | 1 | 3 | 11 |
| -CHAP | 0.13308 | 1 | 3 | 16 |
| -CHAW | 0.13308 | 1 | 3 | 15 |
| -CHDE | 0.13308 | 1 | 3 | 8  |
| -CHDF | 0.13308 | 2 | 6 | 5  |
| -CHEY | 0.13308 | 1 | 3 | 8  |
| -CHFA | 0.13308 | 1 | 3 | 6  |

|       |         |   |    |    |
|-------|---------|---|----|----|
| -CHFL | 0.13308 | 2 | 6  | 18 |
| -CHHI | 0.13308 | 1 | 3  | 9  |
| -CHIG | 0.13308 | 1 | 3  | 17 |
| -CHIR | 0.13308 | 1 | 3  | 21 |
| -CHKE | 0.13308 | 1 | 3  | 8  |
| -CHMI | 0.13308 | 1 | 3  | 10 |
| -CHMT | 0.13308 | 1 | 3  | 14 |
| -CHMV | 0.13308 | 1 | 3  | 10 |
| -CHNM | 0.13308 | 1 | 3  | 9  |
| -CHNT | 0.13308 | 1 | 3  | 44 |
| -CHNY | 0.13308 | 1 | 3  | 11 |
| -CHPG | 0.13308 | 1 | 3  | 18 |
| -CHQY | 0.13308 | 2 | 6  | 11 |
| -CHRI | 0.13308 | 1 | 3  | 11 |
| -CHSA | 0.13308 | 2 | 6  | 24 |
| -CHSV | 0.13308 | 1 | 3  | 13 |
| -CHSW | 0.13308 | 1 | 3  | 12 |
| -CHTF | 0.13308 | 1 | 3  | 7  |
| -CHTW | 0.13308 | 1 | 3  | 23 |
| -CHYK | 0.13308 | 1 | 3  | 12 |
| -CHYS | 0.13308 | 1 | 3  | 23 |
| -CHYT | 0.13308 | 1 | 3  | 8  |
| -CIAK | 0.13308 | 2 | 6  | 18 |
| -CIAY | 0.13308 | 1 | 3  | 9  |
| -CICG | 0.13308 | 1 | 3  | 9  |
| -CICH | 0.13308 | 1 | 3  | 19 |
| -CIDE | 0.13308 | 1 | 3  | 11 |
| -CIDI | 0.13308 | 1 | 3  | 9  |
| -CIDK | 0.13308 | 1 | 3  | 5  |
| -CIDM | 0.13308 | 1 | 3  | 13 |
| -CIDR | 0.13308 | 4 | 12 | 16 |
| -CIFL | 0.13308 | 1 | 3  | 18 |
| -CIFV | 0.13308 | 1 | 3  | 17 |
| -CIGF | 0.13308 | 1 | 3  | 10 |
| -CIGM | 0.13308 | 1 | 3  | 16 |
| -CIHK | 0.13308 | 1 | 3  | 8  |
| -CIHW | 0.13308 | 1 | 3  | 10 |
| -CIKD | 0.13308 | 1 | 3  | 9  |
| -CIKH | 0.13308 | 1 | 3  | 9  |
| -CIKR | 0.13308 | 1 | 3  | 21 |
| -CIKW | 0.13308 | 1 | 3  | 4  |
| -CIKY | 0.13308 | 1 | 3  | 11 |
| -CIMG | 0.13308 | 1 | 3  | 6  |
| -CINA | 0.13308 | 1 | 3  | 17 |
| -CINH | 0.13308 | 1 | 3  | 8  |
| -CINV | 0.13308 | 1 | 3  | 18 |
| -CINY | 0.13308 | 1 | 3  | 6  |
| -CIPA | 0.13308 | 2 | 6  | 24 |
| -CIPP | 0.13308 | 1 | 3  | 9  |
| -CIPV | 0.13308 | 2 | 6  | 15 |
| -CIQD | 0.13308 | 2 | 6  | 10 |
| -CIQQ | 0.13308 | 1 | 3  | 10 |
| -CIQT | 0.13308 | 1 | 3  | 3  |
| -CISQ | 0.13308 | 2 | 6  | 22 |
| -CIWS | 0.13308 | 1 | 3  | 31 |
| -CIWV | 0.13308 | 1 | 3  | 11 |
| -CIYD | 0.13308 | 1 | 3  | 4  |

|       |         |   |   |    |
|-------|---------|---|---|----|
| -CIYG | 0.13308 | 1 | 3 | 19 |
| -CIYH | 0.13308 | 1 | 3 | 16 |
| -CKAH | 0.13308 | 1 | 3 | 7  |
| -CKAK | 0.13308 | 2 | 6 | 16 |
| -CKAP | 0.13308 | 1 | 3 | 19 |
| -CKCA | 0.13308 | 1 | 3 | 22 |
| -CKCG | 0.13308 | 1 | 3 | 7  |
| -CKCH | 0.13308 | 1 | 3 | 5  |
| -CKED | 0.13308 | 2 | 6 | 6  |
| -CKEY | 0.13308 | 1 | 3 | 6  |
| -CKGP | 0.13308 | 1 | 3 | 7  |
| -CKGQ | 0.13308 | 1 | 3 | 5  |
| -CKGY | 0.13308 | 1 | 3 | 13 |
| -CKHG | 0.13308 | 1 | 3 | 5  |
| -CKHI | 0.13308 | 1 | 3 | 10 |
| -CKHK | 0.13308 | 1 | 3 | 11 |
| -CKIK | 0.13308 | 1 | 3 | 18 |
| -CKKE | 0.13308 | 1 | 3 | 4  |
| -CKKG | 0.13308 | 2 | 6 | 5  |
| -CKKH | 0.13308 | 1 | 3 | 4  |
| -CKLY | 0.13308 | 1 | 3 | 25 |
| -CKMG | 0.13308 | 1 | 3 | 10 |
| -CKMN | 0.13308 | 1 | 3 | 7  |
| -CKNC | 0.13308 | 1 | 3 | 6  |
| -CKND | 0.13308 | 1 | 3 | 7  |
| -CKNH | 0.13308 | 1 | 3 | 6  |
| -CKNM | 0.13308 | 1 | 3 | 10 |
| -CKNP | 0.13308 | 1 | 3 | 9  |
| -CKQA | 0.13308 | 1 | 3 | 9  |
| -CKQM | 0.13308 | 1 | 3 | 11 |
| -CKQV | 0.13308 | 2 | 6 | 16 |
| -CKRH | 0.13308 | 1 | 3 | 14 |
| -CKSE | 0.13308 | 2 | 6 | 15 |
| -CKTH | 0.13308 | 1 | 3 | 11 |
| -CKTN | 0.13308 | 1 | 3 | 10 |
| -CKTY | 0.13308 | 1 | 3 | 11 |
| -CKVK | 0.13308 | 1 | 3 | 11 |
| -CKWM | 0.13308 | 1 | 3 | 8  |
| -CKWV | 0.13308 | 1 | 3 | 12 |
| -CKYE | 0.13308 | 1 | 3 | 12 |
| -CLCH | 0.13308 | 1 | 3 | 30 |
| -CLCN | 0.13308 | 1 | 3 | 17 |
| -CLCW | 0.13308 | 2 | 6 | 14 |
| -CLDP | 0.13308 | 2 | 6 | 35 |
| -CLDW | 0.13308 | 1 | 3 | 10 |
| -CLGC | 0.13308 | 1 | 3 | 12 |
| -CLHI | 0.13308 | 1 | 3 | 17 |
| -CLHP | 0.13308 | 1 | 3 | 24 |
| -CLHR | 0.13308 | 2 | 6 | 47 |
| -CLHW | 0.13308 | 1 | 3 | 22 |
| -CLID | 0.13308 | 1 | 3 | 12 |
| -CLKW | 0.13308 | 1 | 3 | 9  |
| -CLMG | 0.13308 | 1 | 3 | 16 |
| -CLMK | 0.13308 | 1 | 3 | 19 |
| -CLQF | 0.13308 | 1 | 3 | 17 |
| -CLWC | 0.13308 | 1 | 3 | 17 |
| -CLWK | 0.13308 | 1 | 3 | 15 |

|       |         |   |    |    |
|-------|---------|---|----|----|
| -CLYF | 0.13308 | 1 | 3  | 20 |
| -CMAD | 0.13308 | 2 | 6  | 9  |
| -CMAH | 0.13308 | 1 | 3  | 7  |
| -CMAI | 0.13308 | 2 | 6  | 20 |
| -CMAN | 0.13308 | 1 | 3  | 9  |
| -CMCE | 0.13308 | 1 | 3  | 4  |
| -CMCL | 0.13308 | 2 | 6  | 21 |
| -CMDI | 0.13308 | 1 | 3  | 13 |
| -CMDN | 0.13308 | 1 | 3  | 6  |
| -CMED | 0.13308 | 1 | 3  | 4  |
| -CMEE | 0.13308 | 2 | 6  | 11 |
| -CMEP | 0.13308 | 1 | 3  | 4  |
| -CMFR | 0.13308 | 1 | 3  | 11 |
| -CMFV | 0.13308 | 2 | 6  | 21 |
| -CMGC | 0.13308 | 1 | 3  | 5  |
| -CMGE | 0.13308 | 1 | 3  | 15 |
| -CMGM | 0.13308 | 1 | 3  | 19 |
| -CMGP | 0.13308 | 1 | 3  | 16 |
| -CMGQ | 0.13308 | 1 | 3  | 11 |
| -CMGT | 0.13308 | 1 | 3  | 12 |
| -CMHD | 0.13308 | 1 | 3  | 6  |
| -CMHI | 0.13308 | 1 | 3  | 12 |
| -CMHM | 0.13308 | 1 | 3  | 15 |
| -CMIH | 0.13308 | 1 | 3  | 6  |
| -CMIW | 0.13308 | 1 | 3  | 12 |
| -CMKG | 0.13308 | 1 | 3  | 17 |
| -CMKM | 0.13308 | 1 | 3  | 8  |
| -CMLE | 0.13308 | 1 | 3  | 20 |
| -CMLG | 0.13308 | 1 | 3  | 23 |
| -CMAA | 0.13308 | 1 | 3  | 12 |
| -CMMG | 0.13308 | 1 | 3  | 10 |
| -CMMH | 0.13308 | 1 | 3  | 2  |
| -CMNT | 0.13308 | 1 | 3  | 6  |
| -CMPP | 0.13308 | 1 | 3  | 19 |
| -CMPY | 0.13308 | 1 | 3  | 16 |
| -CMQA | 0.13308 | 1 | 3  | 10 |
| -CMQR | 0.13308 | 1 | 3  | 10 |
| -CMRH | 0.13308 | 1 | 3  | 11 |
| -CMRL | 0.13308 | 4 | 12 | 51 |
| -CMRY | 0.13308 | 1 | 3  | 16 |
| -CMSI | 0.13308 | 1 | 3  | 10 |
| -CMSQ | 0.13308 | 1 | 3  | 20 |
| -CMTB | 0.13308 | 1 | 3  | 11 |
| -CMTN | 0.13308 | 1 | 3  | 31 |
| -CMTW | 0.13308 | 1 | 3  | 20 |
| -CMTY | 0.13308 | 1 | 3  | 18 |
| -CMVD | 0.13308 | 1 | 3  | 5  |
| -CMVF | 0.13308 | 1 | 3  | 6  |
| -CMVI | 0.13308 | 1 | 3  | 22 |
| -CMWE | 0.13308 | 1 | 3  | 8  |
| -CMYG | 0.13308 | 2 | 6  | 12 |
| -CNCG | 0.13308 | 1 | 3  | 7  |
| -CNCK | 0.13308 | 1 | 3  | 13 |
| -CNCV | 0.13308 | 1 | 3  | 21 |
| -CNDP | 0.13308 | 2 | 6  | 15 |
| -CNEW | 0.13308 | 2 | 6  | 15 |
| -CNFA | 0.13308 | 1 | 3  | 7  |

|       |         |   |   |    |
|-------|---------|---|---|----|
| -CNFH | 0.13308 | 1 | 3 | 11 |
| -CNFL | 0.13308 | 1 | 3 | 24 |
| -CNFT | 0.13308 | 2 | 6 | 20 |
| -CNGN | 0.13308 | 1 | 3 | 15 |
| -CNGQ | 0.13308 | 1 | 3 | 12 |
| -CNHN | 0.13308 | 1 | 3 | 8  |
| -CNHR | 0.13308 | 2 | 6 | 40 |
| -CNHW | 0.13308 | 2 | 6 | 10 |
| -CNKN | 0.13308 | 1 | 3 | 11 |
| -CNKW | 0.13308 | 1 | 3 | 9  |
| -CNLF | 0.13308 | 1 | 3 | 16 |
| -CNLW | 0.13308 | 1 | 3 | 23 |
| -CNLY | 0.13308 | 1 | 3 | 13 |
| -CNME | 0.13308 | 1 | 3 | 25 |
| -CNMN | 0.13308 | 1 | 3 | 3  |
| -CNMW | 0.13308 | 1 | 3 | 8  |
| -CNNM | 0.13308 | 1 | 3 | 15 |
| -CNPV | 0.13308 | 1 | 3 | 12 |
| -CNQA | 0.13308 | 2 | 6 | 16 |
| -CNQP | 0.13308 | 1 | 3 | 12 |
| -CNRC | 0.13308 | 1 | 3 | 23 |
| -CNRN | 0.13308 | 2 | 6 | 37 |
| -CNTH | 0.13308 | 1 | 3 | 13 |
| -CNTI | 0.13308 | 1 | 3 | 14 |
| -CNWH | 0.13308 | 1 | 3 | 7  |
| -CNWL | 0.13308 | 1 | 3 | 19 |
| -CNWP | 0.13308 | 1 | 3 | 23 |
| -CNWW | 0.13308 | 1 | 3 | 8  |
| -CNYF | 0.13308 | 1 | 3 | 5  |
| -CNYH | 0.13308 | 2 | 6 | 15 |
| -CNYK | 0.13308 | 2 | 6 | 20 |
| -CPAH | 0.13308 | 1 | 3 | 9  |
| -CPAY | 0.13308 | 2 | 6 | 24 |
| -CPCW | 0.13308 | 1 | 3 | 19 |
| -CPDA | 0.13308 | 1 | 3 | 17 |
| -CPDS | 0.13308 | 1 | 3 | 24 |
| -CPDT | 0.13308 | 1 | 3 | 25 |
| -CPED | 0.13308 | 2 | 6 | 6  |
| -CPEI | 0.13308 | 1 | 3 | 16 |
| -CPEP | 0.13308 | 1 | 3 | 19 |
| -CPEW | 0.13308 | 1 | 3 | 6  |
| -CPEY | 0.13308 | 1 | 3 | 10 |
| -CPFI | 0.13308 | 1 | 3 | 15 |
| -CPFN | 0.13308 | 1 | 3 | 8  |
| -CPHD | 0.13308 | 1 | 3 | 5  |
| -CPHH | 0.13308 | 1 | 3 | 9  |
| -CPHM | 0.13308 | 1 | 3 | 21 |
| -CPHN | 0.13308 | 1 | 3 | 17 |
| -CPHW | 0.13308 | 1 | 3 | 15 |
| -CPKA | 0.13308 | 1 | 3 | 17 |
| -CPKG | 0.13308 | 2 | 6 | 21 |
| -CPKH | 0.13308 | 2 | 6 | 18 |
| -CPMK | 0.13308 | 1 | 3 | 6  |
| -CPPN | 0.13308 | 1 | 3 | 24 |
| -CPPQ | 0.13308 | 2 | 6 | 19 |
| -CPQA | 0.13308 | 1 | 3 | 9  |
| -CPQF | 0.13308 | 1 | 3 | 5  |

|       |         |   |    |    |
|-------|---------|---|----|----|
| -CPQW | 0.13308 | 1 | 3  | 15 |
| -CPSY | 0.13308 | 4 | 12 | 20 |
| -CPTD | 0.13308 | 4 | 12 | 25 |
| -CPTH | 0.13308 | 1 | 3  | 22 |
| -CPWL | 0.13308 | 1 | 3  | 33 |
| -CPWP | 0.13308 | 2 | 6  | 33 |
| -CPYC | 0.13308 | 1 | 3  | 26 |
| -CPYN | 0.13308 | 1 | 3  | 21 |
| -CPYV | 0.13308 | 2 | 6  | 29 |
| -CPYY | 0.13308 | 1 | 3  | 11 |
| -CQAD | 0.13308 | 1 | 3  | 3  |
| -CQAI | 0.13308 | 1 | 3  | 17 |
| -CQAP | 0.13308 | 1 | 3  | 16 |
| -CQCA | 0.13308 | 1 | 3  | 18 |
| -CQDD | 0.13308 | 1 | 3  | 8  |
| -CQDK | 0.13308 | 1 | 3  | 10 |
| -CQEQ | 0.13308 | 1 | 3  | 6  |
| -CQEW | 0.13308 | 1 | 3  | 7  |
| -CQFG | 0.13308 | 2 | 6  | 16 |
| -CQGC | 0.13308 | 1 | 3  | 2  |
| -CQGE | 0.13308 | 2 | 6  | 10 |
| -CQGF | 0.13308 | 1 | 3  | 3  |
| -CQGM | 0.13308 | 1 | 3  | 7  |
| -CQHD | 0.13308 | 1 | 3  | 20 |
| -CQHT | 0.13308 | 1 | 3  | 15 |
| -CQID | 0.13308 | 1 | 3  | 11 |
| -CQKP | 0.13308 | 1 | 3  | 4  |
| -CQLH | 0.13308 | 1 | 3  | 11 |
| -CQLP | 0.13308 | 1 | 3  | 25 |
| -CQLW | 0.13308 | 1 | 3  | 10 |
| -CQMF | 0.13308 | 1 | 3  | 18 |
| -CQMG | 0.13308 | 1 | 3  | 10 |
| -CQMH | 0.13308 | 1 | 3  | 17 |
| -CQML | 0.13308 | 2 | 6  | 17 |
| -CQMV | 0.13308 | 1 | 3  | 5  |
| -CQMW | 0.13308 | 1 | 3  | 9  |
| -CQNT | 0.13308 | 2 | 6  | 9  |
| -CQNY | 0.13308 | 1 | 3  | 13 |
| -CQPA | 0.13308 | 1 | 3  | 7  |
| -CQPL | 0.13308 | 1 | 3  | 17 |
| -CQPS | 0.13308 | 1 | 3  | 12 |
| -CQRD | 0.13308 | 1 | 3  | 17 |
| -CQSW | 0.13308 | 1 | 3  | 19 |
| -CQTW | 0.13308 | 1 | 3  | 20 |
| -CQVI | 0.13308 | 1 | 3  | 6  |
| -CQVT | 0.13308 | 2 | 6  | 22 |
| -CQVY | 0.13308 | 1 | 3  | 11 |
| -CQWG | 0.13308 | 1 | 3  | 15 |
| -CQYD | 0.13308 | 1 | 3  | 8  |
| -CQYH | 0.13308 | 1 | 3  | 13 |
| -CQYP | 0.13308 | 1 | 3  | 9  |
| -CRAI | 0.13308 | 1 | 3  | 30 |
| -CRAM | 0.13308 | 1 | 3  | 21 |
| -CRCW | 0.13308 | 1 | 3  | 16 |
| -CRDA | 0.13308 | 4 | 12 | 33 |
| -CRDK | 0.13308 | 1 | 3  | 16 |
| -CREE | 0.13308 | 1 | 3  | 8  |

|       |         |    |    |     |
|-------|---------|----|----|-----|
| -CRFD | 0.13308 | 1  | 3  | 18  |
| -CRFN | 0.13308 | 1  | 3  | 22  |
| -CRGQ | 0.13308 | 2  | 6  | 18  |
| -CRKN | 0.13308 | 1  | 3  | 10  |
| -CRKY | 0.13308 | 2  | 6  | 17  |
| -CRLF | 0.13308 | 1  | 3  | 36  |
| -CRMP | 0.13308 | 1  | 3  | 31  |
| -CRMV | 0.13308 | 1  | 3  | 30  |
| -CRMW | 0.13308 | 1  | 3  | 22  |
| -CRNC | 0.13308 | 1  | 3  | 20  |
| -CRNF | 0.13308 | 1  | 3  | 17  |
| -CRNQ | 0.13308 | 1  | 3  | 21  |
| -CRPC | 0.13308 | 2  | 6  | 26  |
| -CRQY | 0.13308 | 1  | 3  | 16  |
| -CRRT | 0.13308 | 4  | 12 | 55  |
| -CRRY | 0.13308 | 1  | 3  | 32  |
| -CRSV | 0.13308 | 13 | 39 | 108 |
| -CRWC | 0.13308 | 1  | 3  | 20  |
| -CRWK | 0.13308 | 1  | 3  | 22  |
| -CRWQ | 0.13308 | 1  | 3  | 6   |
| -CRYG | 0.13308 | 2  | 6  | 34  |
| -CSAE | 0.13308 | 2  | 6  | 26  |
| -CSDH | 0.13308 | 4  | 12 | 22  |
| -CSEF | 0.13308 | 2  | 6  | 13  |
| -CSEN | 0.13308 | 2  | 6  | 17  |
| -CSEW | 0.13308 | 1  | 3  | 15  |
| -CSFC | 0.13308 | 1  | 3  | 14  |
| -CSHC | 0.13308 | 1  | 3  | 14  |
| -CSHM | 0.13308 | 1  | 3  | 10  |
| -CSHP | 0.13308 | 2  | 6  | 26  |
| -CSIH | 0.13308 | 2  | 6  | 13  |
| -CSLI | 0.13308 | 4  | 12 | 42  |
| -CSND | 0.13308 | 1  | 3  | 15  |
| -CSPE | 0.13308 | 1  | 3  | 30  |
| -CSPQ | 0.13308 | 1  | 3  | 32  |
| -CSRY | 0.13308 | 2  | 6  | 38  |
| -CSSF | 0.13308 | 4  | 12 | 35  |
| -CSWC | 0.13308 | 1  | 3  | 11  |
| -CSWD | 0.13308 | 1  | 3  | 8   |
| -CSWF | 0.13308 | 1  | 3  | 26  |
| -CSWL | 0.13308 | 1  | 3  | 51  |
| -CSWV | 0.13308 | 1  | 3  | 27  |
| -CSWW | 0.13308 | 1  | 3  | 16  |
| -CSYW | 0.13308 | 1  | 3  | 18  |
| -CTDE | 0.13308 | 1  | 3  | 5   |
| -CTDW | 0.13308 | 1  | 3  | 5   |
| -CTEE | 0.13308 | 1  | 3  | 14  |
| -CTEQ | 0.13308 | 1  | 3  | 9   |
| -CTFW | 0.13308 | 1  | 3  | 36  |
| -CTGW | 0.13308 | 1  | 3  | 23  |
| -CTHG | 0.13308 | 1  | 3  | 24  |
| -CTIP | 0.13308 | 4  | 12 | 37  |
| -CTLH | 0.13308 | 4  | 12 | 63  |
| -CTMW | 0.13308 | 1  | 3  | 30  |
| -CTNA | 0.13308 | 2  | 6  | 21  |
| -CTNE | 0.13308 | 2  | 6  | 18  |
| -CTPN | 0.13308 | 2  | 6  | 25  |

|       |         |   |   |    |
|-------|---------|---|---|----|
| -CTQF | 0.13308 | 1 | 3 | 13 |
| -CTQK | 0.13308 | 1 | 3 | 10 |
| -CTQT | 0.13308 | 2 | 6 | 35 |
| -CTTP | 0.13308 | 2 | 6 | 25 |
| -CTVD | 0.13308 | 2 | 6 | 12 |
| -CVCD | 0.13308 | 1 | 3 | 13 |
| -CVCH | 0.13308 | 1 | 3 | 10 |
| -CVDY | 0.13308 | 2 | 6 | 13 |
| -CVFR | 0.13308 | 2 | 6 | 16 |
| -CVGF | 0.13308 | 1 | 3 | 16 |
| -CVHE | 0.13308 | 1 | 3 | 17 |
| -CVHI | 0.13308 | 1 | 3 | 19 |
| -CVHK | 0.13308 | 2 | 6 | 26 |
| -CVHR | 0.13308 | 1 | 3 | 50 |
| -CVIK | 0.13308 | 1 | 3 | 23 |
| -CVKD | 0.13308 | 2 | 6 | 10 |
| -CVKE | 0.13308 | 1 | 3 | 11 |
| -CVKI | 0.13308 | 2 | 6 | 6  |
| -CVNY | 0.13308 | 1 | 3 | 11 |
| -CVPC | 0.13308 | 1 | 3 | 15 |
| -CVRW | 0.13308 | 1 | 3 | 34 |
| -CVTY | 0.13308 | 1 | 3 | 23 |
| -CVWC | 0.13308 | 1 | 3 | 7  |
| -CVWI | 0.13308 | 1 | 3 | 8  |
| -CVWQ | 0.13308 | 1 | 3 | 2  |
| -CVWV | 0.13308 | 1 | 3 | 21 |
| -CWAA | 0.13308 | 1 | 3 | 9  |
| -CWAK | 0.13308 | 1 | 3 | 7  |
| -CWAL | 0.13308 | 1 | 3 | 22 |
| -CWAN | 0.13308 | 1 | 3 | 7  |
| -CWCE | 0.13308 | 1 | 3 | 9  |
| -CWDG | 0.13308 | 1 | 3 | 10 |
| -CWDH | 0.13308 | 1 | 3 | 6  |
| -CWDM | 0.13308 | 1 | 3 | 4  |
| -CWDR | 0.13308 | 2 | 6 | 10 |
| -CWEM | 0.13308 | 1 | 3 | 5  |
| -CWER | 0.13308 | 1 | 3 | 12 |
| -CWFN | 0.13308 | 1 | 3 | 7  |
| -CWFQ | 0.13308 | 1 | 3 | 7  |
| -CWFS | 0.13308 | 1 | 3 | 16 |
| -CWGC | 0.13308 | 1 | 3 | 17 |
| -CWGD | 0.13308 | 1 | 3 | 3  |
| -CWGI | 0.13308 | 1 | 3 | 11 |
| -CWGL | 0.13308 | 1 | 3 | 22 |
| -CWHN | 0.13308 | 1 | 3 | 4  |
| -CWID | 0.13308 | 1 | 3 | 5  |
| -CWIG | 0.13308 | 1 | 3 | 16 |
| -CWIP | 0.13308 | 1 | 3 | 6  |
| -CWKT | 0.13308 | 2 | 6 | 13 |
| -CWLK | 0.13308 | 1 | 3 | 46 |
| -CWNL | 0.13308 | 1 | 3 | 13 |
| -CWPC | 0.13308 | 1 | 3 | 11 |
| -CWPH | 0.13308 | 1 | 3 | 7  |
| -CWQC | 0.13308 | 1 | 3 | 22 |
| -CWQR | 0.13308 | 1 | 3 | 16 |
| -CWRK | 0.13308 | 1 | 3 | 15 |
| -CWSW | 0.13308 | 2 | 6 | 20 |



|       |         |   |    |    |
|-------|---------|---|----|----|
| -CWVD | 0.13308 | 1 | 3  | 5  |
| -CWVG | 0.13308 | 1 | 3  | 23 |
| -CWVI | 0.13308 | 1 | 3  | 8  |
| -CWVK | 0.13308 | 1 | 3  | 11 |
| -CWWR | 0.13308 | 1 | 3  | 14 |
| -CWYH | 0.13308 | 1 | 3  | 5  |
| -CWYS | 0.13308 | 1 | 3  | 13 |
| -CWYV | 0.13308 | 1 | 3  | 17 |
| -CYAF | 0.13308 | 1 | 3  | 10 |
| -CYAG | 0.13308 | 2 | 6  | 15 |
| -CYCD | 0.13308 | 1 | 3  | 7  |
| -CYCL | 0.13308 | 2 | 6  | 31 |
| -CYCN | 0.13308 | 1 | 3  | 7  |
| -CYCP | 0.13308 | 1 | 3  | 25 |
| -CYCV | 0.13308 | 1 | 3  | 22 |
| -CYDF | 0.13308 | 1 | 3  | 20 |
| -CYDG | 0.13308 | 1 | 3  | 10 |
| -CYDN | 0.13308 | 1 | 3  | 9  |
| -CYEK | 0.13308 | 1 | 3  | 6  |
| -CYFE | 0.13308 | 1 | 3  | 8  |
| -CYGE | 0.13308 | 1 | 3  | 5  |
| -CYGM | 0.13308 | 1 | 3  | 26 |
| -CYGY | 0.13308 | 2 | 6  | 16 |
| -CYKC | 0.13308 | 1 | 3  | 11 |
| -CYKG | 0.13308 | 1 | 3  | 16 |
| -CYKN | 0.13308 | 1 | 3  | 17 |
| -CYKP | 0.13308 | 1 | 3  | 28 |
| -CYKV | 0.13308 | 1 | 3  | 14 |
| -CYMK | 0.13308 | 1 | 3  | 16 |
| -CYMS | 0.13308 | 2 | 6  | 34 |
| -CYNW | 0.13308 | 1 | 3  | 8  |
| -CYPC | 0.13308 | 1 | 3  | 9  |
| -CYPF | 0.13308 | 1 | 3  | 14 |
| -CYPG | 0.13308 | 2 | 6  | 18 |
| -CYPP | 0.13308 | 1 | 3  | 14 |
| -CYQG | 0.13308 | 2 | 6  | 11 |
| -CYQP | 0.13308 | 1 | 3  | 6  |
| -CYQV | 0.13308 | 1 | 3  | 7  |
| -CYRN | 0.13308 | 1 | 3  | 27 |
| -CYWG | 0.13308 | 1 | 3  | 10 |
| -CYWM | 0.13308 | 1 | 3  | 12 |
| -CYWT | 0.13308 | 1 | 3  | 29 |
| -CAEL | 0.13308 | 3 | 9  | 24 |
| -CAFT | 0.13308 | 3 | 9  | 19 |
| -CATD | 0.13308 | 3 | 9  | 36 |
| -CDSY | 0.13308 | 3 | 9  | 27 |
| -CDTW | 0.13308 | 3 | 9  | 18 |
| -CDVH | 0.13308 | 5 | 15 | 7  |
| -CENE | 0.13308 | 3 | 9  | 16 |
| -CESV | 0.13308 | 6 | 18 | 46 |
| -CFDL | 0.13308 | 3 | 9  | 17 |
| -CGCR | 0.13308 | 3 | 9  | 34 |
| -CGQL | 0.13308 | 3 | 9  | 35 |
| -CGSP | 0.13308 | 3 | 9  | 29 |
| -CKRT | 0.13308 | 5 | 15 | 21 |
| -CKTK | 0.13308 | 3 | 9  | 15 |
| -CKVG | 0.13308 | 3 | 9  | 12 |

|       |         |    |    |     |
|-------|---------|----|----|-----|
| -CLFR | 0.13308 | 3  | 9  | 43  |
| -CLNQ | 0.13308 | 3  | 9  | 39  |
| -CLRM | 0.13308 | 6  | 18 | 74  |
| -CLYE | 0.13308 | 3  | 9  | 28  |
| -CMNG | 0.13308 | 3  | 9  | 10  |
| -CMST | 0.13308 | 3  | 9  | 29  |
| -CNKA | 0.13308 | 6  | 18 | 14  |
| -CNLI | 0.13308 | 3  | 9  | 27  |
| -CNVN | 0.13308 | 3  | 9  | 28  |
| -CNVP | 0.13308 | 3  | 9  | 30  |
| -CPRM | 0.13308 | 6  | 18 | 45  |
| -CPSF | 0.13308 | 3  | 9  | 31  |
| -CRHS | 0.13308 | 3  | 9  | 44  |
| -CRPD | 0.13308 | 3  | 9  | 28  |
| -CRSQ | 0.13308 | 3  | 9  | 33  |
| -CRYL | 0.13308 | 3  | 9  | 56  |
| -CSGY | 0.13308 | 5  | 15 | 30  |
| -CSVE | 0.13308 | 6  | 18 | 42  |
| -CTDG | 0.13308 | 6  | 18 | 29  |
| -CTRH | 0.13308 | 3  | 9  | 32  |
| -CTRM | 0.13308 | 3  | 9  | 29  |
| -CTST | 0.13308 | 9  | 27 | 63  |
| -CTSY | 0.13308 | 6  | 18 | 58  |
| -CTWR | 0.13308 | 3  | 9  | 45  |
| -CVPD | 0.13308 | 3  | 9  | 22  |
| -CVSS | 0.13308 | 20 | 60 | 122 |
| -CYFR | 0.13308 | 3  | 9  | 25  |
| -CYKA | 0.13308 | 3  | 9  | 22  |
| -CYRL | 0.13308 | 3  | 9  | 62  |
| -CYRQ | 0.13308 | 3  | 9  | 19  |
| -CYSA | 0.13308 | 3  | 9  | 19  |
| -CSVL | 0.13688 | 12 | 35 | 93  |
| -CVTT | 0.13767 | 10 | 29 | 42  |
| -CHDR | 0.13974 | 7  | 20 | 26  |
| -CGAD | 0.14091 | 6  | 17 | 9   |
| -CRAR | 0.14091 | 6  | 17 | 91  |
| -CSGM | 0.14091 | 6  | 17 | 34  |
| -CDCS | 0.14259 | 5  | 14 | 23  |
| -CESS | 0.14259 | 5  | 14 | 25  |
| -CHGL | 0.14259 | 5  | 14 | 43  |
| -CLVR | 0.14259 | 10 | 28 | 66  |
| -CMLT | 0.14259 | 5  | 14 | 36  |
| -CCDL | 0.14518 | 4  | 11 | 32  |
| -CDTN | 0.14518 | 4  | 11 | 36  |
| -CEKD | 0.14518 | 4  | 11 | 16  |
| -CFER | 0.14518 | 4  | 11 | 15  |
| -CGLS | 0.14518 | 8  | 22 | 79  |
| -CHPS | 0.14518 | 4  | 11 | 37  |
| -CKDT | 0.14518 | 4  | 11 | 10  |
| -CLAP | 0.14518 | 4  | 11 | 45  |
| -CLPK | 0.14518 | 4  | 11 | 33  |
| -CLQT | 0.14518 | 4  | 11 | 50  |
| -CQES | 0.14518 | 4  | 11 | 11  |
| -CRDW | 0.14518 | 4  | 11 | 26  |
| -CSAS | 0.14518 | 8  | 22 | 85  |
| -CSVH | 0.14518 | 4  | 11 | 36  |
| -CTEC | 0.14518 | 4  | 11 | 10  |

|       |         |    |    |     |
|-------|---------|----|----|-----|
| -CYVL | 0.14518 | 4  | 11 | 56  |
| -CLVL | 0.14639 | 11 | 30 | 93  |
| -CSHE | 0.14709 | 7  | 19 | 32  |
| -CALR | 0.14787 | 10 | 27 | 106 |
| -CAGL | 0.14972 | 3  | 8  | 26  |
| -CAPS | 0.14972 | 3  | 8  | 52  |
| -CAYP | 0.14972 | 3  | 8  | 33  |
| -CCID | 0.14972 | 3  | 8  | 13  |
| -CCIR | 0.14972 | 3  | 8  | 27  |
| -CCKT | 0.14972 | 3  | 8  | 22  |
| -CCSW | 0.14972 | 3  | 8  | 20  |
| -CDEF | 0.14972 | 3  | 8  | 14  |
| -CDVD | 0.14972 | 3  | 8  | 19  |
| -CFLP | 0.14972 | 3  | 8  | 42  |
| -CGDT | 0.14972 | 3  | 8  | 16  |
| -CGPW | 0.14972 | 3  | 8  | 19  |
| -CGQG | 0.14972 | 3  | 8  | 10  |
| -CGVQ | 0.14972 | 3  | 8  | 17  |
| -CHTA | 0.14972 | 3  | 8  | 9   |
| -CITQ | 0.14972 | 6  | 16 | 30  |
| -CKDS | 0.14972 | 3  | 8  | 23  |
| -CKLI | 0.14972 | 3  | 8  | 30  |
| -CKVL | 0.14972 | 3  | 8  | 36  |
| -CLME | 0.14972 | 3  | 8  | 20  |
| -CMAT | 0.14972 | 3  | 8  | 21  |
| -CMCA | 0.14972 | 3  | 8  | 17  |
| -CNNR | 0.14972 | 3  | 8  | 23  |
| -CPAD | 0.14972 | 3  | 8  | 23  |
| -CRAP | 0.14972 | 3  | 8  | 33  |
| -CRCR | 0.14972 | 3  | 8  | 39  |
| -CRFP | 0.14972 | 3  | 8  | 38  |
| -CRRH | 0.14972 | 3  | 8  | 26  |
| -CRRM | 0.14972 | 3  | 8  | 60  |
| -CSAG | 0.14972 | 3  | 8  | 31  |
| -CSEI | 0.14972 | 6  | 16 | 16  |
| -CSKQ | 0.14972 | 3  | 8  | 32  |
| -CSPK | 0.14972 | 6  | 16 | 29  |
| -CSRH | 0.14972 | 3  | 8  | 40  |
| -CSSD | 0.14972 | 6  | 16 | 40  |
| -CSYF | 0.14972 | 3  | 8  | 23  |
| -CTDQ | 0.14972 | 3  | 8  | 21  |
| -CTPS | 0.14972 | 3  | 8  | 57  |
| -CTSH | 0.14972 | 3  | 8  | 35  |
| -CVFP | 0.14972 | 3  | 8  | 14  |
| -CVKT | 0.14972 | 3  | 8  | 25  |
| -CVLP | 0.14972 | 6  | 16 | 70  |
| -CVPS | 0.14972 | 3  | 8  | 53  |
| -CYPA | 0.14972 | 3  | 8  | 15  |
| -CSSV | 0.15107 | 14 | 37 | 95  |
| -CTYS | 0.15209 | 8  | 21 | 72  |
| -CEAR | 0.15356 | 5  | 13 | 36  |
| -CQRE | 0.15356 | 5  | 13 | 10  |
| -CRPE | 0.15356 | 5  | 13 | 34  |
| -CSFT | 0.15356 | 5  | 13 | 46  |
| -CSVV | 0.15356 | 10 | 26 | 47  |
| -CTDH | 0.15356 | 5  | 13 | 15  |
| -CTRQ | 0.15356 | 5  | 13 | 41  |

|        |         |   |    |     |
|--------|---------|---|----|-----|
| -CYVP  | 0.15356 | 5 | 13 | 24  |
| -CALL  | 0.15526 | 7 | 18 | 103 |
| -CHTV  | 0.15526 | 7 | 18 | 31  |
| -CTSM  | 0.15526 | 7 | 18 | 62  |
| -CADK  | 0.1597  | 2 | 5  | 23  |
| -CAEY  | 0.1597  | 2 | 5  | 16  |
| -CAND  | 0.1597  | 2 | 5  | 11  |
| -CASY  | 0.1597  | 2 | 5  | 21  |
| -CAVP  | 0.1597  | 4 | 10 | 26  |
| -CAYI  | 0.1597  | 2 | 5  | 11  |
| -CCCA  | 0.1597  | 2 | 5  | 10  |
| -CCDV  | 0.1597  | 4 | 10 | 16  |
| -CCEC  | 0.1597  | 2 | 5  | 15  |
| -CCFR  | 0.1597  | 2 | 5  | 22  |
| -CCKA  | 0.1597  | 2 | 5  | 11  |
| -CCLF  | 0.1597  | 2 | 5  | 10  |
| -CCLG  | 0.1597  | 2 | 5  | 29  |
| -CCQS  | 0.1597  | 2 | 5  | 27  |
| -CCRC  | 0.1597  | 2 | 5  | 16  |
| -CCSS  | 0.1597  | 6 | 15 | 69  |
| -CCWQ  | 0.1597  | 2 | 5  | 4   |
| -CCYG  | 0.1597  | 2 | 5  | 14  |
| -CDAG  | 0.1597  | 4 | 10 | 14  |
| -CDFM  | 0.1597  | 2 | 5  | 11  |
| -CDGH  | 0.1597  | 2 | 5  | 12  |
| -CDGQ  | 0.1597  | 4 | 10 | 10  |
| -CDKK  | 0.1597  | 2 | 5  | 15  |
| -CDLA  | 0.1597  | 8 | 20 | 28  |
| -CDPF  | 0.1597  | 4 | 10 | 15  |
| -CDSN  | 0.1597  | 4 | 10 | 35  |
| -CDVL  | 0.1597  | 8 | 20 | 40  |
| -CDYV  | 0.1597  | 4 | 10 | 13  |
| -CECG  | 0.1597  | 4 | 10 | 25  |
| -CECI  | 0.1597  | 2 | 5  | 13  |
| -CEEL  | 0.1597  | 2 | 5  | 10  |
| -CEFR  | 0.1597  | 4 | 10 | 27  |
| -CEGK  | 0.1597  | 2 | 5  | 18  |
| -CEKG  | 0.1597  | 2 | 5  | 8   |
| -CEPL  | 0.1597  | 2 | 5  | 27  |
| -CEWA  | 0.1597  | 2 | 5  | 19  |
| -CEYI  | 0.1597  | 2 | 5  | 12  |
| -CFAV  | 0.1597  | 2 | 5  | 10  |
| -CFAY  | 0.1597  | 2 | 5  | 9   |
| -CFCA  | 0.1597  | 2 | 5  | 9   |
| -CFGGA | 0.1597  | 2 | 5  | 9   |
| -CFGK  | 0.1597  | 2 | 5  | 8   |
| -CFMA  | 0.1597  | 2 | 5  | 11  |
| -CFPD  | 0.1597  | 2 | 5  | 13  |
| -CFSD  | 0.1597  | 4 | 10 | 14  |
| -CFVL  | 0.1597  | 2 | 5  | 40  |
| -CGAI  | 0.1597  | 4 | 10 | 34  |
| -CGCE  | 0.1597  | 2 | 5  | 13  |
| -CGDR  | 0.1597  | 2 | 5  | 41  |
| -CGEV  | 0.1597  | 2 | 5  | 16  |
| -CGGA  | 0.1597  | 2 | 5  | 24  |
| -CGHA  | 0.1597  | 2 | 5  | 10  |
| -CGHD  | 0.1597  | 2 | 5  | 12  |

|        |        |   |    |    |
|--------|--------|---|----|----|
| -CGKH  | 0.1597 | 2 | 5  | 21 |
| -CGQR  | 0.1597 | 2 | 5  | 25 |
| -CGRL  | 0.1597 | 4 | 10 | 39 |
| -CGSH  | 0.1597 | 2 | 5  | 28 |
| -CGSQ  | 0.1597 | 2 | 5  | 31 |
| -CGVF  | 0.1597 | 2 | 5  | 20 |
| -CGWD  | 0.1597 | 2 | 5  | 7  |
| -CHDP  | 0.1597 | 2 | 5  | 11 |
| -CHEQ  | 0.1597 | 2 | 5  | 9  |
| -CHGA  | 0.1597 | 2 | 5  | 6  |
| -CHGC  | 0.1597 | 2 | 5  | 6  |
| -CHNC  | 0.1597 | 2 | 5  | 13 |
| -CHQL  | 0.1597 | 2 | 5  | 31 |
| -CHRM  | 0.1597 | 2 | 5  | 21 |
| -CHYG  | 0.1597 | 2 | 5  | 14 |
| -CIFS  | 0.1597 | 2 | 5  | 31 |
| -CISE  | 0.1597 | 2 | 5  | 20 |
| -CITW  | 0.1597 | 2 | 5  | 18 |
| -CIWR  | 0.1597 | 2 | 5  | 21 |
| -CIYM  | 0.1597 | 2 | 5  | 4  |
| -CKDM  | 0.1597 | 2 | 5  | 9  |
| -CKGW  | 0.1597 | 2 | 5  | 4  |
| -CKLF  | 0.1597 | 2 | 5  | 26 |
| -CKMF  | 0.1597 | 2 | 5  | 6  |
| -CKWP  | 0.1597 | 2 | 5  | 6  |
| -CLCL  | 0.1597 | 2 | 5  | 65 |
| -CLGN  | 0.1597 | 2 | 5  | 21 |
| -CLHM  | 0.1597 | 6 | 15 | 19 |
| -CLIP  | 0.1597 | 2 | 5  | 43 |
| -CLKM  | 0.1597 | 2 | 5  | 17 |
| -CLND  | 0.1597 | 2 | 5  | 20 |
| -CLQR  | 0.1597 | 2 | 5  | 25 |
| -CLYI  | 0.1597 | 2 | 5  | 22 |
| -CMAW  | 0.1597 | 2 | 5  | 13 |
| -CMEQ  | 0.1597 | 2 | 5  | 15 |
| -CMHS  | 0.1597 | 2 | 5  | 26 |
| -CMKP  | 0.1597 | 2 | 5  | 7  |
| -CNAH  | 0.1597 | 2 | 5  | 14 |
| -CNCS  | 0.1597 | 2 | 5  | 23 |
| -CNDD  | 0.1597 | 2 | 5  | 14 |
| -CNFE  | 0.1597 | 2 | 5  | 4  |
| -CNKF  | 0.1597 | 2 | 5  | 10 |
| -CNKK  | 0.1597 | 2 | 5  | 21 |
| -CNLN  | 0.1597 | 2 | 5  | 45 |
| -CNPH  | 0.1597 | 2 | 5  | 18 |
| -CNRQ  | 0.1597 | 2 | 5  | 19 |
| -CNRR  | 0.1597 | 2 | 5  | 45 |
| -CNRW  | 0.1597 | 2 | 5  | 17 |
| -CNYN  | 0.1597 | 2 | 5  | 5  |
| -CPEA  | 0.1597 | 2 | 5  | 8  |
| -CPGR  | 0.1597 | 2 | 5  | 19 |
| -CPIY  | 0.1597 | 2 | 5  | 10 |
| -CPKY  | 0.1597 | 2 | 5  | 17 |
| -CPLY  | 0.1597 | 2 | 5  | 25 |
| -CPNK  | 0.1597 | 2 | 5  | 16 |
| -CPPA  | 0.1597 | 2 | 5  | 12 |
| -CPP I | 0.1597 | 2 | 5  | 20 |

|        |         |   |    |    |
|--------|---------|---|----|----|
| -CPVY  | 0.1597  | 2 | 5  | 10 |
| -CQAA  | 0.1597  | 2 | 5  | 18 |
| -CQCV  | 0.1597  | 4 | 10 | 19 |
| -CQEP  | 0.1597  | 2 | 5  | 18 |
| -CQLT  | 0.1597  | 2 | 5  | 36 |
| -CQSQ  | 0.1597  | 2 | 5  | 11 |
| -CRAG  | 0.1597  | 4 | 10 | 46 |
| -CRAY  | 0.1597  | 4 | 10 | 30 |
| -CRCI  | 0.1597  | 2 | 5  | 15 |
| -CREN  | 0.1597  | 2 | 5  | 19 |
| -CRGA  | 0.1597  | 4 | 10 | 28 |
| -CRHD  | 0.1597  | 2 | 5  | 20 |
| -CRHN  | 0.1597  | 2 | 5  | 20 |
| -CRLP  | 0.1597  | 4 | 10 | 62 |
| -CRMN  | 0.1597  | 2 | 5  | 14 |
| -CRMT  | 0.1597  | 2 | 5  | 22 |
| -CRR I | 0.1597  | 2 | 5  | 27 |
| -CSAM  | 0.1597  | 4 | 10 | 25 |
| -CSCE  | 0.1597  | 2 | 5  | 13 |
| -CSDN  | 0.1597  | 2 | 5  | 19 |
| -CSNM  | 0.1597  | 4 | 10 | 26 |
| -CSNN  | 0.1597  | 2 | 5  | 17 |
| -CSQC  | 0.1597  | 2 | 5  | 9  |
| -CTHI  | 0.1597  | 2 | 5  | 11 |
| -CTHS  | 0.1597  | 2 | 5  | 36 |
| -CVDC  | 0.1597  | 2 | 5  | 9  |
| -CVGH  | 0.1597  | 2 | 5  | 21 |
| -CVIR  | 0.1597  | 8 | 20 | 46 |
| -CVMK  | 0.1597  | 2 | 5  | 14 |
| -CVPG  | 0.1597  | 4 | 10 | 21 |
| -CWAS  | 0.1597  | 2 | 5  | 28 |
| -CWCA  | 0.1597  | 4 | 10 | 12 |
| -CWCR  | 0.1597  | 2 | 5  | 14 |
| -CWLI  | 0.1597  | 2 | 5  | 23 |
| -CWPD  | 0.1597  | 2 | 5  | 11 |
| -CWQV  | 0.1597  | 2 | 5  | 16 |
| -CWRA  | 0.1597  | 4 | 10 | 16 |
| -CWTL  | 0.1597  | 2 | 5  | 23 |
| -CYEA  | 0.1597  | 2 | 5  | 7  |
| -CYEI  | 0.1597  | 2 | 5  | 9  |
| -CYGH  | 0.1597  | 2 | 5  | 4  |
| -CYMR  | 0.1597  | 2 | 5  | 25 |
| -CYN I | 0.1597  | 2 | 5  | 10 |
| -CYRP  | 0.1597  | 2 | 5  | 34 |
| -CYSH  | 0.1597  | 2 | 5  | 20 |
| -CYTY  | 0.1597  | 2 | 5  | 14 |
| -CYVW  | 0.1597  | 2 | 5  | 20 |
| -CYVY  | 0.1597  | 2 | 5  | 19 |
| -CLIR  | 0.1644  | 7 | 17 | 47 |
| -CKRP  | 0.16635 | 5 | 12 | 24 |
| -CMRD  | 0.16635 | 5 | 12 | 23 |
| -CPEQ  | 0.16635 | 5 | 12 | 20 |
| -CPYE  | 0.16635 | 5 | 12 | 13 |
| -CRRP  | 0.16635 | 5 | 12 | 56 |
| -CSML  | 0.16635 | 5 | 12 | 40 |
| -CSR M | 0.16635 | 5 | 12 | 58 |
| -CTIR  | 0.16635 | 5 | 12 | 43 |

|       |         |    |    |    |
|-------|---------|----|----|----|
| -CYLV | 0.16635 | 5  | 12 | 61 |
| -CACT | 0.17111 | 3  | 7  | 24 |
| -CALF | 0.17111 | 3  | 7  | 34 |
| -CASF | 0.17111 | 3  | 7  | 44 |
| -CDPI | 0.17111 | 3  | 7  | 17 |
| -CDSM | 0.17111 | 6  | 14 | 19 |
| -CEKL | 0.17111 | 3  | 7  | 21 |
| -CEML | 0.17111 | 3  | 7  | 29 |
| -CEPN | 0.17111 | 3  | 7  | 32 |
| -CFEK | 0.17111 | 3  | 7  | 3  |
| -CFRY | 0.17111 | 3  | 7  | 34 |
| -CFTI | 0.17111 | 3  | 7  | 8  |
| -CGCT | 0.17111 | 3  | 7  | 18 |
| -CHGR | 0.17111 | 3  | 7  | 19 |
| -CHPP | 0.17111 | 3  | 7  | 16 |
| -CIDP | 0.17111 | 3  | 7  | 10 |
| -CKVH | 0.17111 | 3  | 7  | 15 |
| -CLMR | 0.17111 | 3  | 7  | 57 |
| -CMLP | 0.17111 | 3  | 7  | 18 |
| -CMVH | 0.17111 | 3  | 7  | 16 |
| -CNER | 0.17111 | 3  | 7  | 19 |
| -CNNL | 0.17111 | 3  | 7  | 27 |
| -CPHS | 0.17111 | 3  | 7  | 24 |
| -CQGN | 0.17111 | 3  | 7  | 11 |
| -CQRF | 0.17111 | 3  | 7  | 14 |
| -CQTD | 0.17111 | 3  | 7  | 14 |
| -CRAT | 0.17111 | 3  | 7  | 51 |
| -CRML | 0.17111 | 3  | 7  | 52 |
| -CRRL | 0.17111 | 6  | 14 | 92 |
| -CRYP | 0.17111 | 3  | 7  | 42 |
| -CSYC | 0.17111 | 3  | 7  | 13 |
| -CTAY | 0.17111 | 3  | 7  | 10 |
| -CTFP | 0.17111 | 3  | 7  | 32 |
| -CVHF | 0.17111 | 3  | 7  | 16 |
| -CVTL | 0.17111 | 12 | 28 | 65 |
| -CYAY | 0.17111 | 3  | 7  | 19 |
| -CYVE | 0.17111 | 3  | 7  | 19 |
| -CSDA | 0.17467 | 7  | 16 | 23 |
| -CYRS | 0.17467 | 7  | 16 | 53 |
| -CAIE | 0.17744 | 4  | 9  | 20 |
| -CASI | 0.17744 | 4  | 9  | 39 |
| -CDLP | 0.17744 | 8  | 18 | 41 |
| -CETP | 0.17744 | 4  | 9  | 11 |
| -CIPS | 0.17744 | 4  | 9  | 17 |
| -CLQC | 0.17744 | 4  | 9  | 28 |
| -CLRP | 0.17744 | 4  | 9  | 72 |
| -CPLA | 0.17744 | 4  | 9  | 44 |
| -CPLI | 0.17744 | 4  | 9  | 35 |
| -CQCP | 0.17744 | 4  | 9  | 15 |
| -CRDV | 0.17744 | 4  | 9  | 29 |
| -CRFR | 0.17744 | 4  | 9  | 50 |
| -CRHQ | 0.17744 | 4  | 9  | 17 |
| -CRNV | 0.17744 | 4  | 9  | 42 |
| -CRQV | 0.17744 | 4  | 9  | 25 |
| -CRRC | 0.17744 | 4  | 9  | 26 |
| -CVHL | 0.17744 | 4  | 9  | 50 |
| -CYSC | 0.17744 | 4  | 9  | 10 |

|       |         |    |    |     |
|-------|---------|----|----|-----|
| -CTSV | 0.17744 | 12 | 27 | 88  |
| -CRSS | 0.17839 | 21 | 47 | 118 |
| -CARN | 0.18148 | 5  | 11 | 32  |
| -CDGY | 0.18148 | 5  | 11 | 12  |
| -CEDT | 0.18148 | 5  | 11 | 16  |
| -CHNL | 0.18148 | 5  | 11 | 29  |
| -CPAM | 0.18148 | 5  | 11 | 17  |
| -CQRR | 0.18148 | 5  | 11 | 41  |
| -CQVP | 0.18148 | 5  | 11 | 21  |
| -CSNT | 0.18148 | 5  | 11 | 51  |
| -CVLE | 0.18148 | 5  | 11 | 37  |
| -CGVA | 0.18427 | 6  | 13 | 30  |
| -CSDI | 0.18427 | 6  | 13 | 28  |
| -CTSA | 0.18427 | 6  | 13 | 43  |
| -CVES | 0.18427 | 6  | 13 | 38  |
| -CVGR | 0.18427 | 6  | 13 | 62  |
| -CTDA | 0.18631 | 7  | 15 | 43  |
| -CALK | 0.18912 | 9  | 19 | 61  |
| -CLDA | 0.18912 | 9  | 19 | 21  |
| -CLLL | 0.19012 | 10 | 21 | 144 |
| -CLSC | 0.19012 | 10 | 21 | 31  |
| -CSHL | 0.19012 | 10 | 21 | 71  |
| -CVVR | 0.19012 | 10 | 21 | 33  |
| -CLSS | 0.19423 | 18 | 37 | 92  |
| -CLLT | 0.19475 | 20 | 41 | 108 |
| -CSMR | 0.19962 | 9  | 18 | 83  |
| -CAAF | 0.19962 | 1  | 2  | 10  |
| -CAAI | 0.19962 | 2  | 4  | 22  |
| -CAAP | 0.19962 | 1  | 2  | 22  |
| -CAAW | 0.19962 | 1  | 2  | 16  |
| -CAAY | 0.19962 | 1  | 2  | 17  |
| -CACD | 0.19962 | 1  | 2  | 10  |
| -CACN | 0.19962 | 1  | 2  | 9   |
| -CADD | 0.19962 | 2  | 4  | 23  |
| -CADI | 0.19962 | 1  | 2  | 15  |
| -CAER | 0.19962 | 2  | 4  | 30  |
| -CAEV | 0.19962 | 2  | 4  | 16  |
| -CAFQ | 0.19962 | 2  | 4  | 11  |
| -CAFS | 0.19962 | 2  | 4  | 25  |
| -CAGK | 0.19962 | 2  | 4  | 13  |
| -CAGN | 0.19962 | 1  | 2  | 11  |
| -CAGY | 0.19962 | 1  | 2  | 12  |
| -CAHA | 0.19962 | 1  | 2  | 13  |
| -CAHM | 0.19962 | 1  | 2  | 12  |
| -CAHR | 0.19962 | 2  | 4  | 31  |
| -CAHT | 0.19962 | 3  | 6  | 29  |
| -CAHY | 0.19962 | 1  | 2  | 12  |
| -CAKH | 0.19962 | 1  | 2  | 10  |
| -CAKW | 0.19962 | 1  | 2  | 16  |
| -CAMK | 0.19962 | 1  | 2  | 14  |
| -CAMY | 0.19962 | 1  | 2  | 4   |
| -CANM | 0.19962 | 2  | 4  | 19  |
| -CANW | 0.19962 | 1  | 2  | 22  |
| -CAPF | 0.19962 | 1  | 2  | 13  |
| -CAPN | 0.19962 | 2  | 4  | 21  |
| -CAPV | 0.19962 | 1  | 2  | 24  |
| -CAPY | 0.19962 | 1  | 2  | 15  |



|       |         |   |   |    |
|-------|---------|---|---|----|
| -CAQS | 0.19962 | 1 | 2 | 22 |
| -CAQW | 0.19962 | 1 | 2 | 15 |
| -CARH | 0.19962 | 2 | 4 | 10 |
| -CATQ | 0.19962 | 1 | 2 | 21 |
| -CAVY | 0.19962 | 1 | 2 | 11 |
| -CAWD | 0.19962 | 1 | 2 | 17 |
| -CAWE | 0.19962 | 1 | 2 | 8  |
| -CAWP | 0.19962 | 1 | 2 | 12 |
| -CAYA | 0.19962 | 2 | 4 | 12 |
| -CAYD | 0.19962 | 2 | 4 | 17 |
| -CCAL | 0.19962 | 4 | 8 | 35 |
| -CCAP | 0.19962 | 1 | 2 | 10 |
| -CCCL | 0.19962 | 1 | 2 | 17 |
| -CCCV | 0.19962 | 2 | 4 | 10 |
| -CCEI | 0.19962 | 2 | 4 | 9  |
| -CCEW | 0.19962 | 1 | 2 | 9  |
| -CCEY | 0.19962 | 1 | 2 | 7  |
| -CCFA | 0.19962 | 2 | 4 | 6  |
| -CCFC | 0.19962 | 3 | 6 | 14 |
| -CCFP | 0.19962 | 1 | 2 | 7  |
| -CCFS | 0.19962 | 2 | 4 | 19 |
| -CCGA | 0.19962 | 3 | 6 | 10 |
| -CCGD | 0.19962 | 1 | 2 | 1  |
| -CCGS | 0.19962 | 3 | 6 | 38 |
| -CCGV | 0.19962 | 4 | 8 | 19 |
| -CCHA | 0.19962 | 2 | 4 | 7  |
| -CCHF | 0.19962 | 1 | 2 | 8  |
| -CCHK | 0.19962 | 2 | 4 | 15 |
| -CCHN | 0.19962 | 1 | 2 | 17 |
| -CCHY | 0.19962 | 1 | 2 | 9  |
| -CCIP | 0.19962 | 1 | 2 | 7  |
| -CCKF | 0.19962 | 3 | 6 | 12 |
| -CCKH | 0.19962 | 1 | 2 | 9  |
| -CCKQ | 0.19962 | 1 | 2 | 16 |
| -CCLI | 0.19962 | 2 | 4 | 14 |
| -CCLT | 0.19962 | 4 | 8 | 37 |
| -CCMD | 0.19962 | 1 | 2 | 2  |
| -CCMY | 0.19962 | 1 | 2 | 11 |
| -CCND | 0.19962 | 1 | 2 | 3  |
| -CCNE | 0.19962 | 1 | 2 | 5  |
| -CCNH | 0.19962 | 1 | 2 | 5  |
| -CCPI | 0.19962 | 1 | 2 | 13 |
| -CCQD | 0.19962 | 1 | 2 | 6  |
| -CCQP | 0.19962 | 1 | 2 | 7  |
| -CCRG | 0.19962 | 1 | 2 | 12 |
| -CCRH | 0.19962 | 1 | 2 | 15 |
| -CRRR | 0.19962 | 2 | 4 | 40 |
| -CCSA | 0.19962 | 2 | 4 | 24 |
| -CCTC | 0.19962 | 1 | 2 | 10 |
| -CCTF | 0.19962 | 1 | 2 | 4  |
| -CCTP | 0.19962 | 1 | 2 | 21 |
| -CCTS | 0.19962 | 3 | 6 | 37 |
| -CCTW | 0.19962 | 1 | 2 | 23 |
| -CCVD | 0.19962 | 1 | 2 | 21 |
| -CCWC | 0.19962 | 1 | 2 | 6  |
| -CCWE | 0.19962 | 1 | 2 | 4  |
| -CCWG | 0.19962 | 1 | 2 | 7  |

|       |         |   |   |    |
|-------|---------|---|---|----|
| -CCWI | 0.19962 | 1 | 2 | 3  |
| -CCYC | 0.19962 | 1 | 2 | 8  |
| -CCYW | 0.19962 | 1 | 2 | 7  |
| -CDAF | 0.19962 | 1 | 2 | 19 |
| -CDAP | 0.19962 | 2 | 4 | 15 |
| -CDCK | 0.19962 | 1 | 2 | 2  |
| -CDEC | 0.19962 | 1 | 2 | 7  |
| -CDED | 0.19962 | 1 | 2 | 6  |
| -CDEI | 0.19962 | 1 | 2 | 2  |
| -CDEK | 0.19962 | 2 | 4 | 6  |
| -CDEM | 0.19962 | 1 | 2 | 7  |
| -CDFF | 0.19962 | 1 | 2 | 4  |
| -CDFL | 0.19962 | 2 | 4 | 18 |
| -CDFV | 0.19962 | 1 | 2 | 8  |
| -CDHE | 0.19962 | 1 | 2 | 10 |
| -CDIW | 0.19962 | 1 | 2 | 6  |
| -CDKE | 0.19962 | 2 | 4 | 16 |
| -CDKQ | 0.19962 | 1 | 2 | 7  |
| -CDKW | 0.19962 | 1 | 2 | 7  |
| -CDMC | 0.19962 | 1 | 2 | 7  |
| -CDMD | 0.19962 | 1 | 2 | 4  |
| -CDPC | 0.19962 | 1 | 2 | 16 |
| -CDPW | 0.19962 | 1 | 2 | 16 |
| -CDQH | 0.19962 | 1 | 2 | 15 |
| -CDRI | 0.19962 | 3 | 6 | 15 |
| -CDSQ | 0.19962 | 2 | 4 | 15 |
| -CDTY | 0.19962 | 1 | 2 | 11 |
| -CDVY | 0.19962 | 1 | 2 | 10 |
| -CDWQ | 0.19962 | 1 | 2 | 10 |
| -CEAC | 0.19962 | 1 | 2 | 6  |
| -CECH | 0.19962 | 1 | 2 | 5  |
| -CECK | 0.19962 | 1 | 2 | 8  |
| -CECW | 0.19962 | 1 | 2 | 4  |
| -CECY | 0.19962 | 1 | 2 | 8  |
| -CEDY | 0.19962 | 1 | 2 | 3  |
| -CEEK | 0.19962 | 1 | 2 | 4  |
| -CEEN | 0.19962 | 1 | 2 | 6  |
| -CEET | 0.19962 | 1 | 2 | 3  |
| -CEFC | 0.19962 | 1 | 2 | 4  |
| -CEFE | 0.19962 | 1 | 2 | 4  |
| -CEFI | 0.19962 | 2 | 4 | 5  |
| -CEFW | 0.19962 | 1 | 2 | 7  |
| -CEGH | 0.19962 | 1 | 2 | 1  |
| -CEGP | 0.19962 | 1 | 2 | 5  |
| -CEHA | 0.19962 | 1 | 2 | 2  |
| -CEHD | 0.19962 | 1 | 2 | 7  |
| -CEHF | 0.19962 | 1 | 2 | 3  |
| -CEHG | 0.19962 | 1 | 2 | 3  |
| -CEHP | 0.19962 | 1 | 2 | 7  |
| -CEHS | 0.19962 | 1 | 2 | 19 |
| -CEHW | 0.19962 | 1 | 2 | 5  |
| -CEIK | 0.19962 | 2 | 4 | 7  |
| -CEIR | 0.19962 | 3 | 6 | 19 |
| -CEIW | 0.19962 | 1 | 2 | 7  |
| -CEKC | 0.19962 | 1 | 2 | 5  |
| -CEKF | 0.19962 | 1 | 2 | 5  |
| -CEKT | 0.19962 | 1 | 2 | 5  |

|        |         |   |   |    |
|--------|---------|---|---|----|
| -CEMF  | 0.19962 | 1 | 2 | 16 |
| -CEMH  | 0.19962 | 1 | 2 | 1  |
| -CEMW  | 0.19962 | 1 | 2 | 9  |
| -CEMY  | 0.19962 | 1 | 2 | 2  |
| -CENI  | 0.19962 | 1 | 2 | 6  |
| -CENP  | 0.19962 | 2 | 4 | 11 |
| -CEPH  | 0.19962 | 1 | 2 | 14 |
| -CEPM  | 0.19962 | 1 | 2 | 15 |
| -CEQK  | 0.19962 | 1 | 2 | 3  |
| -CEQN  | 0.19962 | 1 | 2 | 9  |
| -CETN  | 0.19962 | 2 | 4 | 11 |
| -CEWK  | 0.19962 | 1 | 2 | 5  |
| -CEWR  | 0.19962 | 1 | 2 | 28 |
| -CEWV  | 0.19962 | 1 | 2 | 12 |
| -CEYF  | 0.19962 | 1 | 2 | 2  |
| -CEYN  | 0.19962 | 2 | 4 | 8  |
| -CFAI  | 0.19962 | 1 | 2 | 13 |
| -CFAN  | 0.19962 | 1 | 2 | 18 |
| -CFCC  | 0.19962 | 1 | 2 | 3  |
| -CFCG  | 0.19962 | 1 | 2 | 7  |
| -CFCW  | 0.19962 | 1 | 2 | 12 |
| -CFDC  | 0.19962 | 1 | 2 | 3  |
| -CFDE  | 0.19962 | 1 | 2 | 6  |
| -CFDY  | 0.19962 | 1 | 2 | 3  |
| -CFED  | 0.19962 | 1 | 2 | 1  |
| -CFEE  | 0.19962 | 2 | 4 | 9  |
| -CFEM  | 0.19962 | 1 | 2 | 4  |
| -CFEN  | 0.19962 | 2 | 4 | 17 |
| -CFEQ  | 0.19962 | 1 | 2 | 8  |
| -CFEY  | 0.19962 | 1 | 2 | 11 |
| -CFFA  | 0.19962 | 1 | 2 | 15 |
| -CFFH  | 0.19962 | 1 | 2 | 12 |
| -CFFI  | 0.19962 | 1 | 2 | 13 |
| -CFFP  | 0.19962 | 1 | 2 | 16 |
| -CFFS  | 0.19962 | 1 | 2 | 13 |
| -CFGC  | 0.19962 | 1 | 2 | 5  |
| -CFGF  | 0.19962 | 1 | 2 | 12 |
| -CFG I | 0.19962 | 1 | 2 | 16 |
| -CFGP  | 0.19962 | 1 | 2 | 7  |
| -CFGQ  | 0.19962 | 1 | 2 | 6  |
| -CFGY  | 0.19962 | 1 | 2 | 8  |
| -CFHR  | 0.19962 | 1 | 2 | 12 |
| -CFHS  | 0.19962 | 1 | 2 | 15 |
| -CFHY  | 0.19962 | 1 | 2 | 1  |
| -CFII  | 0.19962 | 1 | 2 | 1  |
| -CFIR  | 0.19962 | 1 | 2 | 18 |
| -CFKF  | 0.19962 | 2 | 4 | 10 |
| -CFKN  | 0.19962 | 1 | 2 | 8  |
| -CFKW  | 0.19962 | 2 | 4 | 21 |
| -CFLE  | 0.19962 | 4 | 8 | 7  |
| -CFLH  | 0.19962 | 3 | 6 | 38 |
| -CFLV  | 0.19962 | 1 | 2 | 37 |
| -CFML  | 0.19962 | 1 | 2 | 26 |
| -CFNA  | 0.19962 | 1 | 2 | 12 |
| -CFNH  | 0.19962 | 1 | 2 | 8  |
| -CFNV  | 0.19962 | 1 | 2 | 7  |
| -CFNW  | 0.19962 | 2 | 4 | 3  |

|       |         |   |    |    |
|-------|---------|---|----|----|
| -CFNY | 0.19962 | 1 | 2  | 2  |
| -CFPS | 0.19962 | 2 | 4  | 33 |
| -CFQC | 0.19962 | 1 | 2  | 17 |
| -CFQK | 0.19962 | 2 | 4  | 14 |
| -CFQN | 0.19962 | 1 | 2  | 4  |
| -CFQR | 0.19962 | 2 | 4  | 28 |
| -CFQS | 0.19962 | 1 | 2  | 7  |
| -CFQW | 0.19962 | 1 | 2  | 17 |
| -CFQY | 0.19962 | 1 | 2  | 3  |
| -CFRG | 0.19962 | 2 | 4  | 35 |
| -CFSW | 0.19962 | 1 | 2  | 20 |
| -CFTT | 0.19962 | 2 | 4  | 17 |
| -CFTY | 0.19962 | 1 | 2  | 7  |
| -CFVD | 0.19962 | 2 | 4  | 13 |
| -CFVE | 0.19962 | 1 | 2  | 9  |
| -CFVF | 0.19962 | 1 | 2  | 9  |
| -CFVY | 0.19962 | 1 | 2  | 3  |
| -CFWD | 0.19962 | 1 | 2  | 5  |
| -CFWI | 0.19962 | 1 | 2  | 11 |
| -CFWL | 0.19962 | 1 | 2  | 17 |
| -CFWN | 0.19962 | 1 | 2  | 14 |
| -CFWQ | 0.19962 | 1 | 2  | 11 |
| -CFWS | 0.19962 | 2 | 4  | 9  |
| -CFYK | 0.19962 | 1 | 2  | 7  |
| -CFYN | 0.19962 | 1 | 2  | 7  |
| -CFYT | 0.19962 | 3 | 6  | 16 |
| -CGAT | 0.19962 | 3 | 6  | 23 |
| -CGCK | 0.19962 | 1 | 2  | 17 |
| -CGCN | 0.19962 | 2 | 4  | 6  |
| -CGCQ | 0.19962 | 1 | 2  | 10 |
| -CGDM | 0.19962 | 1 | 2  | 24 |
| -CGED | 0.19962 | 3 | 6  | 11 |
| -CGEI | 0.19962 | 1 | 2  | 6  |
| -CGEW | 0.19962 | 2 | 4  | 8  |
| -CGFH | 0.19962 | 1 | 2  | 2  |
| -CGFI | 0.19962 | 1 | 2  | 8  |
| -CGGF | 0.19962 | 1 | 2  | 11 |
| -CGGH | 0.19962 | 1 | 2  | 8  |
| -CGGL | 0.19962 | 6 | 12 | 36 |
| -CGGY | 0.19962 | 2 | 4  | 6  |
| -CGHG | 0.19962 | 2 | 4  | 29 |
| -CGHI | 0.19962 | 1 | 2  | 13 |
| -CGHM | 0.19962 | 1 | 2  | 18 |
| -CGHR | 0.19962 | 2 | 4  | 26 |
| -CGHT | 0.19962 | 1 | 2  | 16 |
| -CGIK | 0.19962 | 1 | 2  | 14 |
| -CGIW | 0.19962 | 2 | 4  | 6  |
| -CGKP | 0.19962 | 2 | 4  | 8  |
| -CGLK | 0.19962 | 1 | 2  | 23 |
| -CGMI | 0.19962 | 1 | 2  | 8  |
| -CGMN | 0.19962 | 3 | 6  | 23 |
| -CGNK | 0.19962 | 1 | 2  | 9  |
| -CGPY | 0.19962 | 1 | 2  | 11 |
| -CGQM | 0.19962 | 1 | 2  | 8  |
| -CGQP | 0.19962 | 1 | 2  | 7  |
| -CGRD | 0.19962 | 2 | 4  | 23 |
| -CGVH | 0.19962 | 2 | 4  | 14 |

|       |         |   |   |    |
|-------|---------|---|---|----|
| -CGWL | 0.19962 | 1 | 2 | 15 |
| -CGWQ | 0.19962 | 1 | 2 | 14 |
| -CGWS | 0.19962 | 2 | 4 | 18 |
| -CGWV | 0.19962 | 1 | 2 | 12 |
| -CGWY | 0.19962 | 1 | 2 | 10 |
| -CGYA | 0.19962 | 1 | 2 | 18 |
| -CGYG | 0.19962 | 1 | 2 | 14 |
| -CGYK | 0.19962 | 1 | 2 | 14 |
| -CHAF | 0.19962 | 1 | 2 | 12 |
| -CHAH | 0.19962 | 1 | 2 | 7  |
| -CHAK | 0.19962 | 1 | 2 | 8  |
| -CHAR | 0.19962 | 2 | 4 | 24 |
| -CHAT | 0.19962 | 1 | 2 | 14 |
| -CHCH | 0.19962 | 1 | 2 | 10 |
| -CHCP | 0.19962 | 1 | 2 | 12 |
| -CHCW | 0.19962 | 1 | 2 | 9  |
| -CHCY | 0.19962 | 1 | 2 | 10 |
| -CHDC | 0.19962 | 1 | 2 | 11 |
| -CHDN | 0.19962 | 1 | 2 | 3  |
| -CHEC | 0.19962 | 1 | 2 | 10 |
| -CHEH | 0.19962 | 1 | 2 | 4  |
| -CHEW | 0.19962 | 1 | 2 | 5  |
| -CHFE | 0.19962 | 1 | 2 | 2  |
| -CHFR | 0.19962 | 1 | 2 | 13 |
| -CHFW | 0.19962 | 1 | 2 | 7  |
| -CHGN | 0.19962 | 1 | 2 | 19 |
| -CHGV | 0.19962 | 3 | 6 | 16 |
| -CHGW | 0.19962 | 1 | 2 | 12 |
| -CHHE | 0.19962 | 1 | 2 | 8  |
| -CHHN | 0.19962 | 1 | 2 | 7  |
| -CHHT | 0.19962 | 2 | 4 | 20 |
| -CHKK | 0.19962 | 2 | 4 | 15 |
| -CHKP | 0.19962 | 1 | 2 | 10 |
| -CHKQ | 0.19962 | 1 | 2 | 10 |
| -CHLD | 0.19962 | 4 | 8 | 26 |
| -CHMA | 0.19962 | 1 | 2 | 10 |
| -CHMY | 0.19962 | 1 | 2 | 5  |
| -CHPC | 0.19962 | 1 | 2 | 15 |
| -CHPH | 0.19962 | 2 | 4 | 16 |
| -CHPK | 0.19962 | 1 | 2 | 17 |
| -CHPY | 0.19962 | 2 | 4 | 13 |
| -CHQA | 0.19962 | 1 | 2 | 9  |
| -CHQD | 0.19962 | 1 | 2 | 6  |
| -CHQF | 0.19962 | 1 | 2 | 9  |
| -CHQH | 0.19962 | 1 | 2 | 8  |
| -CHQI | 0.19962 | 1 | 2 | 5  |
| -CHQK | 0.19962 | 1 | 2 | 8  |
| -CHQR | 0.19962 | 3 | 6 | 28 |
| -CHSH | 0.19962 | 2 | 4 | 7  |
| -CHSY | 0.19962 | 2 | 4 | 15 |
| -CHVG | 0.19962 | 1 | 2 | 23 |
| -CHWC | 0.19962 | 1 | 2 | 3  |
| -CHWD | 0.19962 | 1 | 2 | 8  |
| -CHWE | 0.19962 | 1 | 2 | 5  |
| -CHWF | 0.19962 | 1 | 2 | 2  |
| -CHWG | 0.19962 | 1 | 2 | 4  |
| -CHWH | 0.19962 | 1 | 2 | 3  |

|       |         |   |   |    |
|-------|---------|---|---|----|
| -CHWL | 0.19962 | 1 | 2 | 22 |
| -CHWN | 0.19962 | 1 | 2 | 14 |
| -CHWP | 0.19962 | 1 | 2 | 13 |
| -CHWS | 0.19962 | 1 | 2 | 21 |
| -CHWT | 0.19962 | 1 | 2 | 16 |
| -CHWV | 0.19962 | 2 | 4 | 13 |
| -CHYE | 0.19962 | 2 | 4 | 16 |
| -CHYL | 0.19962 | 1 | 2 | 33 |
| -CHYR | 0.19962 | 1 | 2 | 20 |
| -CIAA | 0.19962 | 2 | 4 | 19 |
| -CIAD | 0.19962 | 1 | 2 | 11 |
| -CIAI | 0.19962 | 2 | 4 | 16 |
| -CIDN | 0.19962 | 2 | 4 | 12 |
| -CIDW | 0.19962 | 1 | 2 | 6  |
| -CIEI | 0.19962 | 1 | 2 | 5  |
| -CIEM | 0.19962 | 1 | 2 | 10 |
| -CIFD | 0.19962 | 1 | 2 | 9  |
| -CIFG | 0.19962 | 1 | 2 | 10 |
| -CIFK | 0.19962 | 1 | 2 | 8  |
| -CIFY | 0.19962 | 1 | 2 | 3  |
| -CIGA | 0.19962 | 4 | 8 | 14 |
| -CIGD | 0.19962 | 2 | 4 | 11 |
| -CIGH | 0.19962 | 1 | 2 | 8  |
| -CIGK | 0.19962 | 1 | 2 | 9  |
| -CIGS | 0.19962 | 4 | 8 | 38 |
| -CIGY | 0.19962 | 1 | 2 | 7  |
| -CIHE | 0.19962 | 2 | 4 | 10 |
| -CIHI | 0.19962 | 1 | 2 | 7  |
| -CIHT | 0.19962 | 1 | 2 | 6  |
| -CIHY | 0.19962 | 1 | 2 | 2  |
| -CIKM | 0.19962 | 2 | 4 | 15 |
| -CIKQ | 0.19962 | 1 | 2 | 7  |
| -CILD | 0.19962 | 2 | 4 | 26 |
| -CIME | 0.19962 | 1 | 2 | 4  |
| -CIMW | 0.19962 | 1 | 2 | 4  |
| -CIMY | 0.19962 | 1 | 2 | 10 |
| -CIND | 0.19962 | 1 | 2 | 9  |
| -CING | 0.19962 | 1 | 2 | 10 |
| -CINK | 0.19962 | 2 | 4 | 15 |
| -CINR | 0.19962 | 1 | 2 | 25 |
| -CINS | 0.19962 | 3 | 6 | 29 |
| -CINW | 0.19962 | 1 | 2 | 4  |
| -CIPE | 0.19962 | 1 | 2 | 14 |
| -CIPY | 0.19962 | 1 | 2 | 7  |
| -CIQF | 0.19962 | 1 | 2 | 13 |
| -CIQN | 0.19962 | 2 | 4 | 10 |
| -CIQV | 0.19962 | 1 | 2 | 6  |
| -CIQW | 0.19962 | 1 | 2 | 11 |
| -CITT | 0.19962 | 1 | 2 | 22 |
| -CIWA | 0.19962 | 1 | 2 | 6  |
| -CIWD | 0.19962 | 1 | 2 | 8  |
| -CIWG | 0.19962 | 1 | 2 | 9  |
| -CIWP | 0.19962 | 1 | 2 | 8  |
| -CIWT | 0.19962 | 1 | 2 | 9  |
| -CIYC | 0.19962 | 1 | 2 | 14 |
| -CIYN | 0.19962 | 1 | 2 | 5  |
| -CIYQ | 0.19962 | 1 | 2 | 18 |

|       |         |   |    |    |
|-------|---------|---|----|----|
| -CIYT | 0.19962 | 2 | 4  | 15 |
| -CIYY | 0.19962 | 1 | 2  | 4  |
| -CKAQ | 0.19962 | 4 | 8  | 20 |
| -CKAW | 0.19962 | 1 | 2  | 13 |
| -CKCC | 0.19962 | 1 | 2  | 18 |
| -CKCI | 0.19962 | 1 | 2  | 6  |
| -CKEF | 0.19962 | 1 | 2  | 5  |
| -CKEH | 0.19962 | 2 | 4  | 4  |
| -CKEI | 0.19962 | 1 | 2  | 10 |
| -CKEK | 0.19962 | 1 | 2  | 4  |
| -CKEN | 0.19962 | 1 | 2  | 7  |
| -CKET | 0.19962 | 2 | 4  | 10 |
| -CKFL | 0.19962 | 2 | 4  | 30 |
| -CKFY | 0.19962 | 1 | 2  | 9  |
| -CKGD | 0.19962 | 1 | 2  | 7  |
| -CKGH | 0.19962 | 1 | 2  | 4  |
| -CKGK | 0.19962 | 1 | 2  | 7  |
| -CKHE | 0.19962 | 1 | 2  | 6  |
| -CKHP | 0.19962 | 1 | 2  | 7  |
| -CKHQ | 0.19962 | 1 | 2  | 3  |
| -CKHT | 0.19962 | 1 | 2  | 9  |
| -CKHV | 0.19962 | 1 | 2  | 13 |
| -CKII | 0.19962 | 1 | 2  | 12 |
| -CKIN | 0.19962 | 1 | 2  | 10 |
| -CKIP | 0.19962 | 1 | 2  | 11 |
| -CKIY | 0.19962 | 1 | 2  | 15 |
| -CKKT | 0.19962 | 1 | 2  | 5  |
| -CKKY | 0.19962 | 2 | 4  | 9  |
| -CKMA | 0.19962 | 1 | 2  | 8  |
| -CKMH | 0.19962 | 1 | 2  | 9  |
| -CKMV | 0.19962 | 1 | 2  | 13 |
| -CKNY | 0.19962 | 3 | 6  | 11 |
| -CKQN | 0.19962 | 1 | 2  | 7  |
| -CKQW | 0.19962 | 1 | 2  | 13 |
| -CKRY | 0.19962 | 1 | 2  | 20 |
| -CKTD | 0.19962 | 2 | 4  | 19 |
| -CKTI | 0.19962 | 1 | 2  | 12 |
| -CKVF | 0.19962 | 1 | 2  | 8  |
| -CKVN | 0.19962 | 1 | 2  | 8  |
| -CKVQ | 0.19962 | 3 | 6  | 16 |
| -CKVW | 0.19962 | 1 | 2  | 20 |
| -CKWN | 0.19962 | 2 | 4  | 18 |
| -CKWW | 0.19962 | 1 | 2  | 1  |
| -CKYA | 0.19962 | 1 | 2  | 9  |
| -CKYF | 0.19962 | 2 | 4  | 8  |
| -CKYM | 0.19962 | 1 | 2  | 14 |
| -CLAF | 0.19962 | 4 | 8  | 46 |
| -CLCD | 0.19962 | 1 | 2  | 6  |
| -CLCI | 0.19962 | 1 | 2  | 18 |
| -CLCV | 0.19962 | 3 | 6  | 30 |
| -CLCY | 0.19962 | 1 | 2  | 10 |
| -CLDE | 0.19962 | 3 | 6  | 13 |
| -CLFA | 0.19962 | 1 | 2  | 19 |
| -CLHF | 0.19962 | 1 | 2  | 18 |
| -CLHH | 0.19962 | 2 | 4  | 21 |
| -CLHL | 0.19962 | 6 | 12 | 81 |
| -CLHY | 0.19962 | 1 | 2  | 19 |

|       |         |   |    |    |
|-------|---------|---|----|----|
| -CLIW | 0.19962 | 1 | 2  | 17 |
| -CLKC | 0.19962 | 2 | 4  | 20 |
| -CLLH | 0.19962 | 4 | 8  | 33 |
| -CLMI | 0.19962 | 2 | 4  | 24 |
| -CLMW | 0.19962 | 1 | 2  | 28 |
| -CLMY | 0.19962 | 1 | 2  | 11 |
| -CLNW | 0.19962 | 2 | 4  | 33 |
| -CLPA | 0.19962 | 7 | 14 | 47 |
| -CLQW | 0.19962 | 1 | 2  | 14 |
| -CLRQ | 0.19962 | 7 | 14 | 35 |
| -CLVD | 0.19962 | 1 | 2  | 20 |
| -CLWE | 0.19962 | 1 | 2  | 8  |
| -CLWN | 0.19962 | 1 | 2  | 19 |
| -CLWS | 0.19962 | 3 | 6  | 51 |
| -CLYM | 0.19962 | 2 | 4  | 25 |
| -CLYW | 0.19962 | 1 | 2  | 28 |
| -CMAC | 0.19962 | 1 | 2  | 4  |
| -CMAF | 0.19962 | 1 | 2  | 9  |
| -CMAL | 0.19962 | 4 | 8  | 20 |
| -CMAM | 0.19962 | 1 | 2  | 8  |
| -CMCD | 0.19962 | 1 | 2  | 12 |
| -CMCV | 0.19962 | 2 | 4  | 8  |
| -CMDH | 0.19962 | 1 | 2  | 10 |
| -CMEK | 0.19962 | 1 | 2  | 7  |
| -CMFG | 0.19962 | 1 | 2  | 5  |
| -CMFQ | 0.19962 | 2 | 4  | 10 |
| -CMFW | 0.19962 | 1 | 2  | 8  |
| -CMGH | 0.19962 | 2 | 4  | 5  |
| -CMGR | 0.19962 | 1 | 2  | 18 |
| -CMHP | 0.19962 | 1 | 2  | 17 |
| -CMHW | 0.19962 | 2 | 4  | 10 |
| -CMHY | 0.19962 | 1 | 2  | 12 |
| -CMKC | 0.19962 | 1 | 2  | 6  |
| -CMKD | 0.19962 | 1 | 2  | 8  |
| -CMLY | 0.19962 | 2 | 4  | 16 |
| -CMLL | 0.19962 | 2 | 4  | 15 |
| -CMMP | 0.19962 | 1 | 2  | 14 |
| -CMMT | 0.19962 | 3 | 6  | 39 |
| -CMNC | 0.19962 | 1 | 2  | 6  |
| -CMND | 0.19962 | 1 | 2  | 6  |
| -CMNH | 0.19962 | 1 | 2  | 5  |
| -CMNN | 0.19962 | 1 | 2  | 11 |
| -CMPC | 0.19962 | 2 | 4  | 22 |
| -CMPF | 0.19962 | 1 | 2  | 19 |
| -CMPH | 0.19962 | 1 | 2  | 7  |
| -CMPS | 0.19962 | 4 | 8  | 41 |
| -CMQD | 0.19962 | 1 | 2  | 2  |
| -CMQE | 0.19962 | 2 | 4  | 6  |
| -CMQG | 0.19962 | 1 | 2  | 9  |
| -CMQI | 0.19962 | 1 | 2  | 3  |
| -CMQK | 0.19962 | 1 | 2  | 7  |
| -CMRV | 0.19962 | 2 | 4  | 17 |
| -CMRW | 0.19962 | 1 | 2  | 19 |
| -CMSH | 0.19962 | 1 | 2  | 12 |
| -CMVW | 0.19962 | 1 | 2  | 8  |
| -CMVY | 0.19962 | 1 | 2  | 11 |
| -CMWA | 0.19962 | 1 | 2  | 12 |



|       |         |   |    |    |
|-------|---------|---|----|----|
| -CMWD | 0.19962 | 1 | 2  | 8  |
| -CMWF | 0.19962 | 1 | 2  | 10 |
| -CMWK | 0.19962 | 1 | 2  | 11 |
| -CMWS | 0.19962 | 1 | 2  | 15 |
| -CMWT | 0.19962 | 1 | 2  | 6  |
| -CMWV | 0.19962 | 1 | 2  | 12 |
| -CMYP | 0.19962 | 1 | 2  | 20 |
| -CMYQ | 0.19962 | 1 | 2  | 14 |
| -CNCH | 0.19962 | 2 | 4  | 2  |
| -CNCI | 0.19962 | 2 | 4  | 6  |
| -CNCY | 0.19962 | 1 | 2  | 11 |
| -CNDN | 0.19962 | 1 | 2  | 7  |
| -CNDT | 0.19962 | 1 | 2  | 11 |
| -CNDV | 0.19962 | 1 | 2  | 18 |
| -CNDW | 0.19962 | 1 | 2  | 6  |
| -CNEA | 0.19962 | 1 | 2  | 9  |
| -CNEH | 0.19962 | 1 | 2  | 8  |
| -CNET | 0.19962 | 1 | 2  | 2  |
| -CNFF | 0.19962 | 1 | 2  | 13 |
| -CNFI | 0.19962 | 2 | 4  | 18 |
| -CNFP | 0.19962 | 1 | 2  | 7  |
| -CNFW | 0.19962 | 1 | 2  | 5  |
| -CNGD | 0.19962 | 1 | 2  | 6  |
| -CNHC | 0.19962 | 1 | 2  | 8  |
| -CNHM | 0.19962 | 1 | 2  | 16 |
| -CNHP | 0.19962 | 2 | 4  | 13 |
| -CNHQ | 0.19962 | 1 | 2  | 10 |
| -CNHT | 0.19962 | 1 | 2  | 13 |
| -CNIH | 0.19962 | 1 | 2  | 4  |
| -CNKQ | 0.19962 | 1 | 2  | 14 |
| -CNMP | 0.19962 | 2 | 4  | 11 |
| -CNMY | 0.19962 | 1 | 2  | 10 |
| -CNNP | 0.19962 | 1 | 2  | 15 |
| -CNNQ | 0.19962 | 1 | 2  | 9  |
| -CNNY | 0.19962 | 1 | 2  | 9  |
| -CNPC | 0.19962 | 1 | 2  | 9  |
| -CNPM | 0.19962 | 1 | 2  | 17 |
| -CNQC | 0.19962 | 1 | 2  | 14 |
| -CNQE | 0.19962 | 1 | 2  | 2  |
| -CNQF | 0.19962 | 1 | 2  | 8  |
| -CNQK | 0.19962 | 1 | 2  | 8  |
| -CNQM | 0.19962 | 1 | 2  | 8  |
| -CNQV | 0.19962 | 1 | 2  | 17 |
| -CNSH | 0.19962 | 3 | 6  | 21 |
| -CNSY | 0.19962 | 2 | 4  | 22 |
| -CNTM | 0.19962 | 1 | 2  | 21 |
| -CNTQ | 0.19962 | 1 | 2  | 25 |
| -CNVE | 0.19962 | 2 | 4  | 21 |
| -CNVH | 0.19962 | 6 | 12 | 21 |
| -CNWA | 0.19962 | 1 | 2  | 6  |
| -CNWD | 0.19962 | 1 | 2  | 4  |
| -CNWE | 0.19962 | 1 | 2  | 7  |
| -CNWG | 0.19962 | 1 | 2  | 11 |
| -CNWN | 0.19962 | 1 | 2  | 4  |
| -CNWR | 0.19962 | 2 | 4  | 28 |
| -CNWY | 0.19962 | 1 | 2  | 9  |
| -CNYI | 0.19962 | 1 | 2  | 16 |

|       |         |    |    |    |
|-------|---------|----|----|----|
| -CNYP | 0.19962 | 1  | 2  | 14 |
| -CNYR | 0.19962 | 2  | 4  | 28 |
| -CPAV | 0.19962 | 1  | 2  | 26 |
| -CPCR | 0.19962 | 2  | 4  | 56 |
| -CPCS | 0.19962 | 3  | 6  | 29 |
| -CPEN | 0.19962 | 4  | 8  | 16 |
| -CPFC | 0.19962 | 1  | 2  | 10 |
| -CPFH | 0.19962 | 1  | 2  | 8  |
| -CPGC | 0.19962 | 1  | 2  | 11 |
| -CPGH | 0.19962 | 1  | 2  | 7  |
| -CPGI | 0.19962 | 2  | 4  | 20 |
| -CPGK | 0.19962 | 2  | 4  | 8  |
| -CPGP | 0.19962 | 2  | 4  | 16 |
| -CPGW | 0.19962 | 3  | 6  | 23 |
| -CPHP | 0.19962 | 3  | 6  | 15 |
| -CPIH | 0.19962 | 1  | 2  | 15 |
| -CPKF | 0.19962 | 2  | 4  | 8  |
| -CPKM | 0.19962 | 1  | 2  | 19 |
| -CPKQ | 0.19962 | 1  | 2  | 10 |
| -CPMG | 0.19962 | 1  | 2  | 7  |
| -CPNC | 0.19962 | 1  | 2  | 8  |
| -CPNW | 0.19962 | 2  | 4  | 14 |
| -CPPD | 0.19962 | 2  | 4  | 8  |
| -CPPE | 0.19962 | 2  | 4  | 12 |
| -CPPF | 0.19962 | 2  | 4  | 21 |
| -CPQP | 0.19962 | 1  | 2  | 13 |
| -CPVL | 0.19962 | 12 | 24 | 57 |
| -CPWF | 0.19962 | 1  | 2  | 8  |
| -CPWI | 0.19962 | 1  | 2  | 10 |
| -CPWK | 0.19962 | 1  | 2  | 18 |
| -CPWR | 0.19962 | 1  | 2  | 35 |
| -CPWS | 0.19962 | 1  | 2  | 27 |
| -CPWV | 0.19962 | 1  | 2  | 15 |
| -CPWW | 0.19962 | 1  | 2  | 13 |
| -CPWY | 0.19962 | 1  | 2  | 4  |
| -CPYA | 0.19962 | 2  | 4  | 26 |
| -CPYW | 0.19962 | 1  | 2  | 23 |
| -CQAG | 0.19962 | 2  | 4  | 11 |
| -CQAW | 0.19962 | 1  | 2  | 19 |
| -CQCE | 0.19962 | 1  | 2  | 7  |
| -CQCN | 0.19962 | 1  | 2  | 15 |
| -CQCQ | 0.19962 | 1  | 2  | 15 |
| -CQCR | 0.19962 | 3  | 6  | 13 |
| -CQDH | 0.19962 | 1  | 2  | 4  |
| -CQDY | 0.19962 | 1  | 2  | 4  |
| -CQED | 0.19962 | 1  | 2  | 7  |
| -CQEH | 0.19962 | 1  | 2  | 7  |
| -CQEK | 0.19962 | 1  | 2  | 11 |
| -CQEM | 0.19962 | 2  | 4  | 5  |
| -CQEN | 0.19962 | 1  | 2  | 12 |
| -CQEV | 0.19962 | 1  | 2  | 3  |
| -CQFC | 0.19962 | 1  | 2  | 16 |
| -CQFD | 0.19962 | 3  | 6  | 3  |
| -CQFE | 0.19962 | 1  | 2  | 7  |
| -CQFK | 0.19962 | 1  | 2  | 11 |
| -CQFP | 0.19962 | 1  | 2  | 5  |
| -CQGH | 0.19962 | 1  | 2  | 6  |

|       |         |   |    |    |
|-------|---------|---|----|----|
| -CQHM | 0.19962 | 1 | 2  | 7  |
| -CQIK | 0.19962 | 1 | 2  | 11 |
| -CQKF | 0.19962 | 1 | 2  | 4  |
| -CQKG | 0.19962 | 1 | 2  | 5  |
| -CQKI | 0.19962 | 1 | 2  | 1  |
| -CQKK | 0.19962 | 1 | 2  | 4  |
| -CQKY | 0.19962 | 1 | 2  | 6  |
| -CQMA | 0.19962 | 1 | 2  | 19 |
| -CQMR | 0.19962 | 2 | 4  | 16 |
| -CQNP | 0.19962 | 1 | 2  | 10 |
| -CQNQ | 0.19962 | 2 | 4  | 13 |
| -CQPY | 0.19962 | 1 | 2  | 9  |
| -CQQC | 0.19962 | 1 | 2  | 7  |
| -CQQD | 0.19962 | 1 | 2  | 12 |
| -CQQT | 0.19962 | 1 | 2  | 10 |
| -CQRC | 0.19962 | 2 | 4  | 9  |
| -CQSC | 0.19962 | 1 | 2  | 9  |
| -CQTC | 0.19962 | 1 | 2  | 7  |
| -CQTI | 0.19962 | 2 | 4  | 16 |
| -CQTY | 0.19962 | 1 | 2  | 12 |
| -CQVK | 0.19962 | 4 | 8  | 12 |
| -CQVN | 0.19962 | 1 | 2  | 5  |
| -CQWP | 0.19962 | 2 | 4  | 11 |
| -CQWV | 0.19962 | 1 | 2  | 5  |
| -CQYC | 0.19962 | 1 | 2  | 4  |
| -CQYK | 0.19962 | 1 | 2  | 2  |
| -CQYT | 0.19962 | 1 | 2  | 15 |
| -CRCN | 0.19962 | 1 | 2  | 7  |
| -CRCS | 0.19962 | 6 | 12 | 31 |
| -CRCT | 0.19962 | 3 | 6  | 35 |
| -CRCY | 0.19962 | 1 | 2  | 9  |
| -CRFI | 0.19962 | 1 | 2  | 18 |
| -CRFY | 0.19962 | 1 | 2  | 15 |
| -CRGH | 0.19962 | 1 | 2  | 1  |
| -CRGP | 0.19962 | 1 | 2  | 23 |
| -CRHH | 0.19962 | 3 | 6  | 27 |
| -CRHR | 0.19962 | 3 | 6  | 50 |
| -CRID | 0.19962 | 1 | 2  | 18 |
| -CRIE | 0.19962 | 2 | 4  | 22 |
| -CRIG | 0.19962 | 1 | 2  | 28 |
| -CRIK | 0.19962 | 1 | 2  | 11 |
| -CRIR | 0.19962 | 6 | 12 | 58 |
| -CRIW | 0.19962 | 1 | 2  | 23 |
| -CRKH | 0.19962 | 1 | 2  | 15 |
| -CRKI | 0.19962 | 1 | 2  | 24 |
| -CRLT | 0.19962 | 3 | 6  | 73 |
| -CRMH | 0.19962 | 1 | 2  | 13 |
| -CRMY | 0.19962 | 2 | 4  | 17 |
| -CRNP | 0.19962 | 1 | 2  | 26 |
| -CRPQ | 0.19962 | 1 | 2  | 24 |
| -CRQC | 0.19962 | 1 | 2  | 11 |
| -CRQG | 0.19962 | 3 | 6  | 23 |
| -CRQK | 0.19962 | 2 | 4  | 12 |
| -CRQQ | 0.19962 | 1 | 2  | 20 |
| -CRQW | 0.19962 | 1 | 2  | 10 |
| -CRRW | 0.19962 | 1 | 2  | 35 |
| -CRSF | 0.19962 | 2 | 4  | 25 |

|       |         |   |    |    |
|-------|---------|---|----|----|
| -CRTF | 0.19962 | 1 | 2  | 18 |
| -CRTM | 0.19962 | 2 | 4  | 39 |
| -CRTW | 0.19962 | 2 | 4  | 20 |
| -CRVD | 0.19962 | 3 | 6  | 21 |
| -CRWE | 0.19962 | 2 | 4  | 13 |
| -CRWG | 0.19962 | 1 | 2  | 13 |
| -CRWM | 0.19962 | 1 | 2  | 14 |
| -CRWR | 0.19962 | 2 | 4  | 34 |
| -CRWY | 0.19962 | 1 | 2  | 24 |
| -CRYF | 0.19962 | 1 | 2  | 15 |
| -CRYV | 0.19962 | 4 | 8  | 29 |
| -CSDQ | 0.19962 | 2 | 4  | 10 |
| -CSEY | 0.19962 | 3 | 6  | 10 |
| -CSFQ | 0.19962 | 1 | 2  | 27 |
| -CSFW | 0.19962 | 1 | 2  | 22 |
| -CSFY | 0.19962 | 1 | 2  | 12 |
| -CSHF | 0.19962 | 2 | 4  | 32 |
| -CSHH | 0.19962 | 1 | 2  | 16 |
| -CSHW | 0.19962 | 1 | 2  | 9  |
| -CSKA | 0.19962 | 4 | 8  | 36 |
| -CSKH | 0.19962 | 1 | 2  | 19 |
| -CSLH | 0.19962 | 4 | 8  | 59 |
| -CSMK | 0.19962 | 3 | 6  | 27 |
| -CSMT | 0.19962 | 4 | 8  | 49 |
| -CSNP | 0.19962 | 2 | 4  | 27 |
| -CSNY | 0.19962 | 2 | 4  | 20 |
| -CSPS | 0.19962 | 4 | 8  | 61 |
| -CSQY | 0.19962 | 1 | 2  | 14 |
| -CSRQ | 0.19962 | 2 | 4  | 31 |
| -CSWI | 0.19962 | 1 | 2  | 8  |
| -CSWN | 0.19962 | 1 | 2  | 21 |
| -CSWY | 0.19962 | 1 | 2  | 21 |
| -CSYQ | 0.19962 | 2 | 4  | 14 |
| -CTAC | 0.19962 | 2 | 4  | 12 |
| -CTCI | 0.19962 | 3 | 6  | 20 |
| -CTCW | 0.19962 | 1 | 2  | 16 |
| -CTDC | 0.19962 | 1 | 2  | 19 |
| -CTDI | 0.19962 | 2 | 4  | 11 |
| -CTDV | 0.19962 | 8 | 16 | 33 |
| -CTEN | 0.19962 | 2 | 4  | 19 |
| -CTFF | 0.19962 | 1 | 2  | 13 |
| -CTGC | 0.19962 | 1 | 2  | 22 |
| -CTGM | 0.19962 | 3 | 6  | 15 |
| -CTHE | 0.19962 | 2 | 4  | 21 |
| -CTHF | 0.19962 | 2 | 4  | 16 |
| -CTHY | 0.19962 | 1 | 2  | 10 |
| -CTKN | 0.19962 | 1 | 2  | 11 |
| -CTPM | 0.19962 | 1 | 2  | 35 |
| -CTQH | 0.19962 | 1 | 2  | 4  |
| -CTQI | 0.19962 | 2 | 4  | 4  |
| -CTQQ | 0.19962 | 1 | 2  | 7  |
| -CTQW | 0.19962 | 1 | 2  | 13 |
| -CTTQ | 0.19962 | 1 | 2  | 30 |
| -CTVH | 0.19962 | 3 | 6  | 35 |
| -CTWA | 0.19962 | 1 | 2  | 8  |
| -CTWC | 0.19962 | 1 | 2  | 16 |
| -CTWE | 0.19962 | 1 | 2  | 13 |

|       |         |    |    |    |
|-------|---------|----|----|----|
| -CTWK | 0.19962 | 2  | 4  | 15 |
| -CTYA | 0.19962 | 2  | 4  | 16 |
| -CTYE | 0.19962 | 1  | 2  | 17 |
| -CTYW | 0.19962 | 1  | 2  | 11 |
| -CVCP | 0.19962 | 3  | 6  | 17 |
| -CVCR | 0.19962 | 1  | 2  | 28 |
| -CVED | 0.19962 | 2  | 4  | 24 |
| -CVFD | 0.19962 | 1  | 2  | 12 |
| -CVGC | 0.19962 | 1  | 2  | 14 |
| -CVGW | 0.19962 | 2  | 4  | 17 |
| -CVHD | 0.19962 | 1  | 2  | 10 |
| -CVKQ | 0.19962 | 1  | 2  | 5  |
| -CVME | 0.19962 | 2  | 4  | 18 |
| -CVMW | 0.19962 | 1  | 2  | 16 |
| -CVNI | 0.19962 | 1  | 2  | 12 |
| -CVNT | 0.19962 | 1  | 2  | 21 |
| -CVPH | 0.19962 | 1  | 2  | 24 |
| -CVPM | 0.19962 | 1  | 2  | 14 |
| -CVPW | 0.19962 | 1  | 2  | 16 |
| -CVTH | 0.19962 | 3  | 6  | 32 |
| -CVWD | 0.19962 | 1  | 2  | 17 |
| -CVWE | 0.19962 | 1  | 2  | 4  |
| -CVWG | 0.19962 | 1  | 2  | 14 |
| -CVWH | 0.19962 | 1  | 2  | 12 |
| -CVYT | 0.19962 | 2  | 4  | 21 |
| -CVYY | 0.19962 | 1  | 2  | 9  |
| -CWAE | 0.19962 | 1  | 2  | 7  |
| -CWAG | 0.19962 | 2  | 4  | 6  |
| -CWAI | 0.19962 | 1  | 2  | 14 |
| -CWAU | 0.19962 | 1  | 2  | 10 |
| -CWCS | 0.19962 | 2  | 4  | 16 |
| -CWDE | 0.19962 | 1  | 2  | 1  |
| -CWDQ | 0.19962 | 1  | 2  | 2  |
| -CWEC | 0.19962 | 1  | 2  | 6  |
| -CWEV | 0.19962 | 1  | 2  | 9  |
| -CWEW | 0.19962 | 1  | 2  | 4  |
| -CWFR | 0.19962 | 1  | 2  | 11 |
| -CWGA | 0.19962 | 1  | 2  | 8  |
| -CWGP | 0.19962 | 1  | 2  | 1  |
| -CWGR | 0.19962 | 2  | 4  | 8  |
| -CWGT | 0.19962 | 1  | 2  | 11 |
| -CWGW | 0.19962 | 1  | 2  | 9  |
| -CWHC | 0.19962 | 1  | 2  | 9  |
| -CWHW | 0.19962 | 1  | 2  | 1  |
| -CWHY | 0.19962 | 1  | 2  | 16 |
| -CWKI | 0.19962 | 1  | 2  | 5  |
| -CWKP | 0.19962 | 1  | 2  | 6  |
| -CWLN | 0.19962 | 1  | 2  | 10 |
| -CWLS | 0.19962 | 11 | 22 | 47 |
| -CWLY | 0.19962 | 1  | 2  | 11 |
| -CWME | 0.19962 | 1  | 2  | 14 |
| -CWMG | 0.19962 | 1  | 2  | 9  |
| -CWMK | 0.19962 | 1  | 2  | 17 |
| -CWML | 0.19962 | 1  | 2  | 8  |
| -CWMT | 0.19962 | 1  | 2  | 18 |
| -CWMV | 0.19962 | 1  | 2  | 14 |
| -CWNF | 0.19962 | 1  | 2  | 10 |

|       |         |   |    |    |
|-------|---------|---|----|----|
| -CWNK | 0.19962 | 1 | 2  | 11 |
| -CWNV | 0.19962 | 1 | 2  | 6  |
| -CWPA | 0.19962 | 1 | 2  | 8  |
| -CWPI | 0.19962 | 1 | 2  | 8  |
| -CWPK | 0.19962 | 1 | 2  | 6  |
| -CWPM | 0.19962 | 2 | 4  | 10 |
| -CWQG | 0.19962 | 1 | 2  | 13 |
| -CWQM | 0.19962 | 1 | 2  | 3  |
| -CWRC | 0.19962 | 1 | 2  | 15 |
| -CWRD | 0.19962 | 1 | 2  | 12 |
| -CWRE | 0.19962 | 1 | 2  | 4  |
| -CWRQ | 0.19962 | 1 | 2  | 10 |
| -CWSI | 0.19962 | 1 | 2  | 16 |
| -CWSN | 0.19962 | 1 | 2  | 17 |
| -CWSQ | 0.19962 | 1 | 2  | 15 |
| -CWSS | 0.19962 | 6 | 12 | 29 |
| -CWTF | 0.19962 | 2 | 4  | 13 |
| -CWTI | 0.19962 | 1 | 2  | 25 |
| -CWTV | 0.19962 | 1 | 2  | 33 |
| -CWVA | 0.19962 | 1 | 2  | 20 |
| -CWVN | 0.19962 | 1 | 2  | 13 |
| -CWWG | 0.19962 | 1 | 2  | 15 |
| -CWWL | 0.19962 | 1 | 2  | 15 |
| -CWWM | 0.19962 | 1 | 2  | 4  |
| -CWWP | 0.19962 | 1 | 2  | 10 |
| -CWWS | 0.19962 | 1 | 2  | 26 |
| -CWYA | 0.19962 | 1 | 2  | 13 |
| -CWYI | 0.19962 | 1 | 2  | 3  |
| -CWYK | 0.19962 | 1 | 2  | 10 |
| -CWYL | 0.19962 | 1 | 2  | 22 |
| -CYAQ | 0.19962 | 1 | 2  | 18 |
| -CYDD | 0.19962 | 1 | 2  | 5  |
| -CYEC | 0.19962 | 1 | 2  | 5  |
| -CYFD | 0.19962 | 1 | 2  | 6  |
| -CYFH | 0.19962 | 1 | 2  | 6  |
| -CYFL | 0.19962 | 1 | 2  | 18 |
| -CYFN | 0.19962 | 1 | 2  | 16 |
| -CYFS | 0.19962 | 1 | 2  | 4  |
| -CYGP | 0.19962 | 2 | 4  | 22 |
| -CYGR | 0.19962 | 2 | 4  | 33 |
| -CYGW | 0.19962 | 1 | 2  | 8  |
| -CYHG | 0.19962 | 2 | 4  | 4  |
| -CYHQ | 0.19962 | 2 | 4  | 8  |
| -CYHT | 0.19962 | 1 | 2  | 13 |
| -CYMV | 0.19962 | 1 | 2  | 24 |
| -CYMY | 0.19962 | 1 | 2  | 15 |
| -CYNF | 0.19962 | 1 | 2  | 6  |
| -CYNG | 0.19962 | 1 | 2  | 23 |
| -CYNT | 0.19962 | 1 | 2  | 14 |
| -CYQA | 0.19962 | 1 | 2  | 3  |
| -CYQF | 0.19962 | 1 | 2  | 19 |
| -CYQM | 0.19962 | 1 | 2  | 14 |
| -CYQS | 0.19962 | 2 | 4  | 21 |
| -CYQW | 0.19962 | 1 | 2  | 11 |
| -CYRW | 0.19962 | 1 | 2  | 6  |
| -CYSM | 0.19962 | 1 | 2  | 20 |
| -CYVV | 0.19962 | 4 | 8  | 40 |

|       |         |    |    |     |
|-------|---------|----|----|-----|
| -CYWA | 0.19962 | 1  | 2  | 8   |
| -CYWH | 0.19962 | 1  | 2  | 7   |
| -CYWQ | 0.19962 | 1  | 2  | 11  |
| -CYYA | 0.19962 | 2  | 4  | 12  |
| -CYYD | 0.19962 | 1  | 2  | 6   |
| -CYYE | 0.19962 | 1  | 2  | 17  |
| -CYYK | 0.19962 | 1  | 2  | 13  |
| -CYYW | 0.19962 | 1  | 2  | 4   |
| -CGVT | 0.19962 | 5  | 10 | 20  |
| -CSQN | 0.19962 | 5  | 10 | 41  |
| -CVVD | 0.19962 | 5  | 10 | 14  |
| -CSSS | 0.20606 | 32 | 62 | 114 |
| -CIVR | 0.20913 | 11 | 21 | 46  |
| -CPQR | 0.21293 | 8  | 15 | 25  |
| -CTCR | 0.21498 | 7  | 13 | 50  |
| -CCHL | 0.21777 | 6  | 11 | 12  |
| -CDRD | 0.21777 | 6  | 11 | 19  |
| -CHDL | 0.21777 | 6  | 11 | 41  |
| -CHRL | 0.21777 | 6  | 11 | 46  |
| -CQYA | 0.21777 | 6  | 11 | 12  |
| -CTYV | 0.21777 | 6  | 11 | 34  |
| -CCLN | 0.2218  | 5  | 9  | 26  |
| -CCSM | 0.2218  | 5  | 9  | 23  |
| -CGRA | 0.2218  | 5  | 9  | 35  |
| -CLVY | 0.2218  | 5  | 9  | 21  |
| -CMRG | 0.2218  | 5  | 9  | 25  |
| -CRMV | 0.2218  | 5  | 9  | 79  |
| -CVDP | 0.2218  | 5  | 9  | 15  |
| -CNSK | 0.22358 | 14 | 25 | 34  |
| -CRRR | 0.22458 | 9  | 16 | 44  |
| -CSYN | 0.22458 | 9  | 16 | 30  |
| -CTML | 0.22458 | 9  | 16 | 54  |
| -CVMR | 0.22458 | 9  | 16 | 38  |
| -CDDH | 0.22814 | 4  | 7  | 11  |
| -CDNG | 0.22814 | 4  | 7  | 15  |
| -CEVH | 0.22814 | 4  | 7  | 13  |
| -CGDP | 0.22814 | 4  | 7  | 20  |
| -CHLN | 0.22814 | 4  | 7  | 32  |
| -CHSQ | 0.22814 | 4  | 7  | 26  |
| -CHVD | 0.22814 | 4  | 7  | 16  |
| -CHVH | 0.22814 | 4  | 7  | 20  |
| -CIHL | 0.22814 | 8  | 14 | 23  |
| -CILE | 0.22814 | 4  | 7  | 20  |
| -CLDH | 0.22814 | 4  | 7  | 13  |
| -CLML | 0.22814 | 4  | 7  | 89  |
| -CMCS | 0.22814 | 4  | 7  | 16  |
| -CRDP | 0.22814 | 4  | 7  | 28  |
| -CRRQ | 0.22814 | 4  | 7  | 58  |
| -CSEH | 0.22814 | 4  | 7  | 18  |
| -CTEF | 0.22814 | 4  | 7  | 25  |
| -CVCL | 0.22814 | 4  | 7  | 32  |
| -CPSD | 0.23114 | 11 | 19 | 27  |
| -CAAL | 0.23289 | 7  | 12 | 55  |
| -CMYA | 0.23289 | 7  | 12 | 21  |
| -CSIP | 0.23289 | 7  | 12 | 45  |
| -CPKT | 0.23485 | 10 | 17 | 21  |
| -CACR | 0.23955 | 6  | 10 | 42  |

|       |         |    |    |    |
|-------|---------|----|----|----|
| -CADV | 0.23955 | 3  | 5  | 11 |
| -CAEN | 0.23955 | 3  | 5  | 14 |
| -CAYS | 0.23955 | 3  | 5  | 31 |
| -CCEE | 0.23955 | 3  | 5  | 2  |
| -CCHP | 0.23955 | 3  | 5  | 15 |
| -CCPA | 0.23955 | 3  | 5  | 13 |
| -CCVH | 0.23955 | 3  | 5  | 15 |
| -CDGC | 0.23955 | 3  | 5  | 13 |
| -CDSC | 0.23955 | 3  | 5  | 8  |
| -CELP | 0.23955 | 6  | 10 | 41 |
| -CELV | 0.23955 | 3  | 5  | 30 |
| -CEQV | 0.23955 | 3  | 5  | 15 |
| -CEVI | 0.23955 | 3  | 5  | 23 |
| -CFDG | 0.23955 | 3  | 5  | 14 |
| -CFTE | 0.23955 | 3  | 5  | 19 |
| -CGTK | 0.23955 | 3  | 5  | 14 |
| -CHHP | 0.23955 | 3  | 5  | 21 |
| -CHHS | 0.23955 | 3  | 5  | 32 |
| -CHKY | 0.23955 | 3  | 5  | 11 |
| -CHNG | 0.23955 | 3  | 5  | 15 |
| -CHRT | 0.23955 | 3  | 5  | 30 |
| -CIEH | 0.23955 | 3  | 5  | 14 |
| -CKNV | 0.23955 | 3  | 5  | 10 |
| -CLEN | 0.23955 | 3  | 5  | 22 |
| -CLQA | 0.23955 | 3  | 5  | 32 |
| -CMCR | 0.23955 | 3  | 5  | 20 |
| -CMEH | 0.23955 | 3  | 5  | 9  |
| -CNGI | 0.23955 | 3  | 5  | 11 |
| -CNNA | 0.23955 | 3  | 5  | 9  |
| -CNWV | 0.23955 | 3  | 5  | 22 |
| -CPCD | 0.23955 | 3  | 5  | 6  |
| -CPYL | 0.23955 | 3  | 5  | 56 |
| -CQAK | 0.23955 | 3  | 5  | 13 |
| -CQLV | 0.23955 | 3  | 5  | 18 |
| -CQNC | 0.23955 | 3  | 5  | 9  |
| -CRVF | 0.23955 | 3  | 5  | 14 |
| -CSCP | 0.23955 | 3  | 5  | 23 |
| -CSTH | 0.23955 | 3  | 5  | 37 |
| -CTCA | 0.23955 | 6  | 10 | 20 |
| -CTCT | 0.23955 | 3  | 5  | 27 |
| -CVDH | 0.23955 | 3  | 5  | 20 |
| -CVWS | 0.23955 | 3  | 5  | 28 |
| -CWFL | 0.23955 | 6  | 10 | 27 |
| -CWLA | 0.23955 | 3  | 5  | 27 |
| -CWLL | 0.23955 | 3  | 5  | 39 |
| -CWVV | 0.23955 | 3  | 5  | 18 |
| -CYAV | 0.23955 | 3  | 5  | 21 |
| -CYCS | 0.23955 | 3  | 5  | 13 |
| -CYEQ | 0.23955 | 3  | 5  | 10 |
| -CYNQ | 0.23955 | 3  | 5  | 11 |
| -CYRR | 0.23955 | 3  | 5  | 48 |
| -CELS | 0.24165 | 23 | 38 | 68 |
| -CASA | 0.24398 | 11 | 18 | 38 |
| -CELL | 0.24398 | 11 | 18 | 53 |
| -CVAS | 0.24781 | 18 | 29 | 46 |
| -CHLP | 0.24953 | 5  | 8  | 25 |
| -CHMS | 0.24953 | 5  | 8  | 21 |



|       |         |    |    |    |
|-------|---------|----|----|----|
| -CPVS | 0.24953 | 5  | 8  | 48 |
| -CQAE | 0.24953 | 5  | 8  | 17 |
| -CRVN | 0.24953 | 5  | 8  | 40 |
| -CVDL | 0.24953 | 10 | 16 | 39 |
| -CYVH | 0.24953 | 5  | 8  | 27 |
| -CLVG | 0.25216 | 12 | 19 | 28 |
| -CALP | 0.25407 | 7  | 11 | 60 |
| -CIDL | 0.25407 | 7  | 11 | 36 |
| -CLRK | 0.25407 | 7  | 11 | 56 |
| -CVSC | 0.25407 | 7  | 11 | 24 |
| -CYLT | 0.25407 | 7  | 11 | 29 |
| -CACS | 0.25552 | 32 | 50 | 84 |
| -CTCV | 0.25666 | 9  | 14 | 35 |
| -CVTI | 0.25666 | 9  | 14 | 20 |
| -CADH | 0.26616 | 2  | 3  | 13 |
| -CAEP | 0.26616 | 2  | 3  | 23 |
| -CAGF | 0.26616 | 2  | 3  | 13 |
| -CALW | 0.26616 | 2  | 3  | 25 |
| -CALY | 0.26616 | 4  | 6  | 36 |
| -CAQA | 0.26616 | 2  | 3  | 20 |
| -CARI | 0.26616 | 2  | 3  | 21 |
| -CARW | 0.26616 | 2  | 3  | 15 |
| -CAWC | 0.26616 | 2  | 3  | 6  |
| -CAYN | 0.26616 | 4  | 6  | 30 |
| -CAYY | 0.26616 | 2  | 3  | 16 |
| -CCAW | 0.26616 | 2  | 3  | 7  |
| -CCCD | 0.26616 | 2  | 3  | 10 |
| -CCDI | 0.26616 | 2  | 3  | 4  |
| -CCFI | 0.26616 | 2  | 3  | 4  |
| -CCFT | 0.26616 | 2  | 3  | 22 |
| -CCFV | 0.26616 | 2  | 3  | 6  |
| -CCGP | 0.26616 | 2  | 3  | 14 |
| -CCGR | 0.26616 | 2  | 3  | 28 |
| -CCHG | 0.26616 | 2  | 3  | 15 |
| -CCHQ | 0.26616 | 2  | 3  | 9  |
| -CCHR | 0.26616 | 2  | 3  | 19 |
| -CCHS | 0.26616 | 2  | 3  | 25 |
| -CCLE | 0.26616 | 2  | 3  | 22 |
| -CCLY | 0.26616 | 2  | 3  | 28 |
| -CCMG | 0.26616 | 2  | 3  | 13 |
| -CCNC | 0.26616 | 2  | 3  | 12 |
| -CCPM | 0.26616 | 2  | 3  | 33 |
| -CCRF | 0.26616 | 2  | 3  | 19 |
| -CCSQ | 0.26616 | 2  | 3  | 7  |
| -CCWD | 0.26616 | 2  | 3  | 2  |
| -CDAQ | 0.26616 | 2  | 3  | 13 |
| -CDDY | 0.26616 | 2  | 3  | 11 |
| -CDHV | 0.26616 | 4  | 6  | 34 |
| -CDKS | 0.26616 | 2  | 3  | 20 |
| -CDLE | 0.26616 | 2  | 3  | 16 |
| -CDND | 0.26616 | 2  | 3  | 15 |
| -CDQM | 0.26616 | 2  | 3  | 6  |
| -CDWG | 0.26616 | 2  | 3  | 4  |
| -CDYP | 0.26616 | 2  | 3  | 8  |
| -CEAQ | 0.26616 | 2  | 3  | 5  |
| -CECC | 0.26616 | 2  | 3  | 20 |
| -CEDN | 0.26616 | 4  | 6  | 13 |

|       |         |   |   |    |
|-------|---------|---|---|----|
| -CEIN | 0.26616 | 2 | 3 | 7  |
| -CENS | 0.26616 | 2 | 3 | 23 |
| -CEQL | 0.26616 | 2 | 3 | 15 |
| -CEWL | 0.26616 | 2 | 3 | 11 |
| -CFEG | 0.26616 | 2 | 3 | 8  |
| -CFGH | 0.26616 | 2 | 3 | 10 |
| -CFMI | 0.26616 | 2 | 3 | 9  |
| -CFMS | 0.26616 | 2 | 3 | 17 |
| -CFNR | 0.26616 | 2 | 3 | 28 |
| -CFQH | 0.26616 | 2 | 3 | 9  |
| -CFRC | 0.26616 | 2 | 3 | 12 |
| -CFTC | 0.26616 | 2 | 3 | 8  |
| -CFTL | 0.26616 | 4 | 6 | 37 |
| -CFTW | 0.26616 | 2 | 3 | 10 |
| -CGAY | 0.26616 | 2 | 3 | 8  |
| -CGCF | 0.26616 | 2 | 3 | 8  |
| -CGCY | 0.26616 | 2 | 3 | 7  |
| -CGDY | 0.26616 | 2 | 3 | 10 |
| -CGNE | 0.26616 | 2 | 3 | 8  |
| -CGNF | 0.26616 | 4 | 6 | 16 |
| -CGPH | 0.26616 | 2 | 3 | 20 |
| -CGQC | 0.26616 | 2 | 3 | 11 |
| -CGQI | 0.26616 | 2 | 3 | 14 |
| -CGWR | 0.26616 | 2 | 3 | 19 |
| -CHCI | 0.26616 | 2 | 3 | 4  |
| -CHCV | 0.26616 | 2 | 3 | 7  |
| -CHHY | 0.26616 | 2 | 3 | 14 |
| -CHLW | 0.26616 | 2 | 3 | 13 |
| -CHRQ | 0.26616 | 4 | 6 | 22 |
| -CHYV | 0.26616 | 2 | 3 | 14 |
| -CIAP | 0.26616 | 2 | 3 | 22 |
| -CICK | 0.26616 | 2 | 3 | 7  |
| -CIFT | 0.26616 | 2 | 3 | 16 |
| -CIHS | 0.26616 | 2 | 3 | 14 |
| -CIIP | 0.26616 | 2 | 3 | 7  |
| -CILP | 0.26616 | 2 | 3 | 16 |
| -CIPN | 0.26616 | 2 | 3 | 19 |
| -CIQI | 0.26616 | 2 | 3 | 16 |
| -CKAE | 0.26616 | 2 | 3 | 11 |
| -CKAY | 0.26616 | 2 | 3 | 10 |
| -CKER | 0.26616 | 2 | 3 | 5  |
| -CKFD | 0.26616 | 2 | 3 | 18 |
| -CKGE | 0.26616 | 2 | 3 | 5  |
| -CKHC | 0.26616 | 2 | 3 | 7  |
| -CKKK | 0.26616 | 2 | 3 | 7  |
| -CKKL | 0.26616 | 2 | 3 | 21 |
| -CKMR | 0.26616 | 2 | 3 | 33 |
| -CKWD | 0.26616 | 2 | 3 | 5  |
| -CKYP | 0.26616 | 2 | 3 | 19 |
| -CLFH | 0.26616 | 2 | 3 | 17 |
| -CLLF | 0.26616 | 2 | 3 | 39 |
| -CLMN | 0.26616 | 2 | 3 | 26 |
| -CLQP | 0.26616 | 2 | 3 | 18 |
| -CLWA | 0.26616 | 2 | 3 | 20 |
| -CLWL | 0.26616 | 4 | 6 | 57 |
| -CLWT | 0.26616 | 2 | 3 | 36 |
| -CLYY | 0.26616 | 2 | 3 | 24 |

|       |         |    |    |    |
|-------|---------|----|----|----|
| -CMAE | 0.26616 | 2  | 3  | 13 |
| -CMDA | 0.26616 | 2  | 3  | 14 |
| -CMDL | 0.26616 | 2  | 3  | 12 |
| -CMEG | 0.26616 | 2  | 3  | 18 |
| -CMFI | 0.26616 | 2  | 3  | 11 |
| -CMFS | 0.26616 | 4  | 6  | 18 |
| -CMIP | 0.26616 | 2  | 3  | 12 |
| -CMKE | 0.26616 | 2  | 3  | 7  |
| -CMRN | 0.26616 | 4  | 6  | 17 |
| -CMSY | 0.26616 | 2  | 3  | 12 |
| -CNCL | 0.26616 | 2  | 3  | 19 |
| -CNFK | 0.26616 | 2  | 3  | 16 |
| -CNFN | 0.26616 | 2  | 3  | 8  |
| -CNIP | 0.26616 | 8  | 12 | 15 |
| -CNPI | 0.26616 | 2  | 3  | 8  |
| -CNPW | 0.26616 | 2  | 3  | 12 |
| -CNYT | 0.26616 | 2  | 3  | 15 |
| -CPCL | 0.26616 | 4  | 6  | 37 |
| -CPDD | 0.26616 | 2  | 3  | 10 |
| -CPDY | 0.26616 | 2  | 3  | 5  |
| -CPIQ | 0.26616 | 2  | 3  | 13 |
| -CPMH | 0.26616 | 2  | 3  | 11 |
| -CQEG | 0.26616 | 2  | 3  | 11 |
| -CQKV | 0.26616 | 2  | 3  | 12 |
| -CQND | 0.26616 | 2  | 3  | 6  |
| -CQTA | 0.26616 | 4  | 6  | 13 |
| -CQTQ | 0.26616 | 2  | 3  | 10 |
| -CQYN | 0.26616 | 2  | 3  | 8  |
| -CRCG | 0.26616 | 2  | 3  | 13 |
| -CRFC | 0.26616 | 2  | 3  | 19 |
| -CRGF | 0.26616 | 2  | 3  | 19 |
| -CRGI | 0.26616 | 4  | 6  | 21 |
| -CRGM | 0.26616 | 2  | 3  | 12 |
| -CRKW | 0.26616 | 2  | 3  | 24 |
| -CRPM | 0.26616 | 2  | 3  | 21 |
| -CRWD | 0.26616 | 2  | 3  | 10 |
| -CRYH | 0.26616 | 2  | 3  | 15 |
| -CRYK | 0.26616 | 2  | 3  | 17 |
| -CSAH | 0.26616 | 2  | 3  | 26 |
| -CSQA | 0.26616 | 2  | 3  | 20 |
| -CSSA | 0.26616 | 16 | 24 | 62 |
| -CSTF | 0.26616 | 2  | 3  | 29 |
| -CSTQ | 0.26616 | 2  | 3  | 43 |
| -CSVY | 0.26616 | 4  | 6  | 24 |
| -CSWK | 0.26616 | 2  | 3  | 26 |
| -CTCE | 0.26616 | 2  | 3  | 21 |
| -CTEH | 0.26616 | 2  | 3  | 15 |
| -CTFH | 0.26616 | 2  | 3  | 20 |
| -CTFN | 0.26616 | 2  | 3  | 6  |
| -CTFY | 0.26616 | 2  | 3  | 11 |
| -CTMN | 0.26616 | 2  | 3  | 20 |
| -CTNM | 0.26616 | 2  | 3  | 14 |
| -CTPW | 0.26616 | 2  | 3  | 27 |
| -CTQA | 0.26616 | 2  | 3  | 12 |
| -CTQD | 0.26616 | 2  | 3  | 10 |
| -CTQR | 0.26616 | 4  | 6  | 31 |
| -CTSQ | 0.26616 | 2  | 3  | 41 |

|       |         |    |    |    |
|-------|---------|----|----|----|
| -CTWD | 0.26616 | 2  | 3  | 5  |
| -CTWF | 0.26616 | 2  | 3  | 9  |
| -CTYT | 0.26616 | 4  | 6  | 16 |
| -CVAK | 0.26616 | 8  | 12 | 27 |
| -CVFN | 0.26616 | 2  | 3  | 15 |
| -CVFS | 0.26616 | 4  | 6  | 39 |
| -CVKF | 0.26616 | 2  | 3  | 4  |
| -CVKW | 0.26616 | 4  | 6  | 24 |
| -CVNW | 0.26616 | 2  | 3  | 24 |
| -CVPQ | 0.26616 | 2  | 3  | 23 |
| -CVPY | 0.26616 | 2  | 3  | 13 |
| -CVYF | 0.26616 | 2  | 3  | 21 |
| -CVYI | 0.26616 | 2  | 3  | 14 |
| -CVYR | 0.26616 | 2  | 3  | 21 |
| -CWED | 0.26616 | 2  | 3  | 7  |
| -CWHL | 0.26616 | 2  | 3  | 17 |
| -CWHT | 0.26616 | 2  | 3  | 21 |
| -CWIL | 0.26616 | 2  | 3  | 15 |
| -CWMR | 0.26616 | 2  | 3  | 18 |
| -CWNP | 0.26616 | 2  | 3  | 14 |
| -CWQK | 0.26616 | 2  | 3  | 17 |
| -CWRP | 0.26616 | 2  | 3  | 16 |
| -CWRW | 0.26616 | 2  | 3  | 14 |
| -CWTC | 0.26616 | 4  | 6  | 7  |
| -CWYD | 0.26616 | 2  | 3  | 25 |
| -CWYE | 0.26616 | 2  | 3  | 12 |
| -CWYR | 0.26616 | 2  | 3  | 12 |
| -CYCF | 0.26616 | 2  | 3  | 9  |
| -CYCI | 0.26616 | 2  | 3  | 18 |
| -CYDE | 0.26616 | 2  | 3  | 8  |
| -CYDM | 0.26616 | 2  | 3  | 8  |
| -CYDY | 0.26616 | 2  | 3  | 14 |
| -CYHI | 0.26616 | 2  | 3  | 15 |
| -CYHM | 0.26616 | 2  | 3  | 11 |
| -CYMD | 0.26616 | 2  | 3  | 14 |
| -CYPK | 0.26616 | 2  | 3  | 20 |
| -CYPW | 0.26616 | 2  | 3  | 14 |
| -CYTM | 0.26616 | 2  | 3  | 15 |
| -CYTQ | 0.26616 | 2  | 3  | 16 |
| -CYTW | 0.26616 | 2  | 3  | 21 |
| -CYVT | 0.26616 | 4  | 6  | 31 |
| -CAMV | 0.26616 | 10 | 15 | 13 |
| -CTAD | 0.26616 | 6  | 9  | 24 |
| -CTVP | 0.26616 | 6  | 9  | 52 |
| -CTYD | 0.26616 | 6  | 9  | 22 |
| -CDRR | 0.27149 | 17 | 25 | 61 |
| -CRVT | 0.27317 | 13 | 19 | 43 |
| -CEVV | 0.27448 | 11 | 16 | 20 |
| -CCLP | 0.2764  | 9  | 13 | 36 |
| -CYLR | 0.27947 | 7  | 10 | 35 |
| -CHVL | 0.28182 | 12 | 17 | 86 |
| -CTSS | 0.2828  | 34 | 48 | 99 |
| -CALH | 0.28518 | 5  | 7  | 45 |
| -CDRC | 0.28518 | 5  | 7  | 20 |
| -CGPP | 0.28518 | 5  | 7  | 37 |
| -CLCP | 0.28518 | 5  | 7  | 47 |
| -CTMD | 0.28518 | 5  | 7  | 18 |

|       |         |    |    |     |
|-------|---------|----|----|-----|
| -CTMT | 0.28664 | 28 | 39 | 65  |
| -CDRV | 0.29036 | 8  | 11 | 28  |
| -CPLN | 0.29036 | 8  | 11 | 47  |
| -CRLL | 0.29036 | 16 | 22 | 130 |
| -CSYD | 0.29036 | 8  | 11 | 21  |
| -CVPV | 0.29036 | 8  | 11 | 32  |
| -CHLL | 0.29418 | 14 | 19 | 60  |
| -CGVS | 0.29943 | 9  | 12 | 38  |
| -CACA | 0.29943 | 3  | 4  | 15  |
| -CAID | 0.29943 | 3  | 4  | 16  |
| -CAYM | 0.29943 | 6  | 8  | 27  |
| -CCRK | 0.29943 | 3  | 4  | 21  |
| -CDGD | 0.29943 | 3  | 4  | 15  |
| -CDKP | 0.29943 | 3  | 4  | 9   |
| -CDVW | 0.29943 | 3  | 4  | 10  |
| -CFTF | 0.29943 | 3  | 4  | 26  |
| -CGHV | 0.29943 | 3  | 4  | 24  |
| -CGPI | 0.29943 | 3  | 4  | 34  |
| -CGRC | 0.29943 | 3  | 4  | 30  |
| -CGTD | 0.29943 | 3  | 4  | 7   |
| -CHLH | 0.29943 | 3  | 4  | 34  |
| -CHTK | 0.29943 | 3  | 4  | 27  |
| -CILY | 0.29943 | 3  | 4  | 22  |
| -CKAC | 0.29943 | 3  | 4  | 14  |
| -CKRN | 0.29943 | 3  | 4  | 12  |
| -CLQN | 0.29943 | 3  | 4  | 36  |
| -CMEM | 0.29943 | 3  | 4  | 12  |
| -CMLL | 0.29943 | 3  | 4  | 36  |
| -CMSW | 0.29943 | 3  | 4  | 25  |
| -CMYH | 0.29943 | 3  | 4  | 12  |
| -CNRM | 0.29943 | 3  | 4  | 30  |
| -CPME | 0.29943 | 3  | 4  | 15  |
| -CPND | 0.29943 | 3  | 4  | 9   |
| -CPPC | 0.29943 | 3  | 4  | 18  |
| -CQFI | 0.29943 | 3  | 4  | 11  |
| -CRHP | 0.29943 | 3  | 4  | 33  |
| -CRPW | 0.29943 | 3  | 4  | 26  |
| -CSCG | 0.29943 | 3  | 4  | 12  |
| -CSED | 0.29943 | 6  | 8  | 31  |
| -CTEY | 0.29943 | 3  | 4  | 9   |
| -CTFI | 0.29943 | 3  | 4  | 22  |
| -CTWS | 0.29943 | 3  | 4  | 38  |
| -CVAW | 0.29943 | 3  | 4  | 30  |
| -CVLH | 0.29943 | 3  | 4  | 15  |
| -CYCT | 0.29943 | 3  | 4  | 14  |
| -CYKL | 0.29943 | 3  | 4  | 26  |
| -CYLL | 0.29943 | 12 | 16 | 68  |
| -CYLN | 0.29943 | 3  | 4  | 30  |
| -CYRH | 0.29943 | 3  | 4  | 20  |
| -CMNR | 0.30711 | 10 | 13 | 33  |
| -CSIG | 0.30711 | 10 | 13 | 37  |
| -CRDD | 0.31052 | 7  | 9  | 22  |
| -CACV | 0.3194  | 4  | 5  | 9   |
| -CAVH | 0.3194  | 4  | 5  | 37  |
| -CCLL | 0.3194  | 4  | 5  | 41  |
| -CCMT | 0.3194  | 4  | 5  | 29  |
| -CCRV | 0.3194  | 4  | 5  | 21  |

|       |         |    |    |    |
|-------|---------|----|----|----|
| -CDHC | 0.3194  | 4  | 5  | 18 |
| -CDWD | 0.3194  | 4  | 5  | 9  |
| -CEGE | 0.3194  | 4  | 5  | 3  |
| -CFES | 0.3194  | 8  | 10 | 19 |
| -CFSQ | 0.3194  | 4  | 5  | 17 |
| -CHDA | 0.3194  | 4  | 5  | 17 |
| -CHRG | 0.3194  | 4  | 5  | 16 |
| -CHVI | 0.3194  | 4  | 5  | 20 |
| -CHVP | 0.3194  | 8  | 10 | 40 |
| -CICR | 0.3194  | 4  | 5  | 11 |
| -CILL | 0.3194  | 4  | 5  | 45 |
| -CIRG | 0.3194  | 4  | 5  | 34 |
| -CMIR | 0.3194  | 4  | 5  | 22 |
| -CMTQ | 0.3194  | 4  | 5  | 16 |
| -CNDL | 0.3194  | 4  | 5  | 19 |
| -CPLF | 0.3194  | 4  | 5  | 28 |
| -CRCA | 0.3194  | 8  | 10 | 42 |
| -CRLH | 0.3194  | 4  | 5  | 25 |
| -CSCN | 0.3194  | 4  | 5  | 28 |
| -CYVD | 0.3194  | 4  | 5  | 19 |
| -CLLP | 0.32439 | 13 | 16 | 67 |
| -CDSO | 0.32666 | 9  | 11 | 23 |
| -CVQS | 0.32666 | 9  | 11 | 27 |
| -CCLR | 0.3327  | 5  | 6  | 66 |
| -CDRA | 0.3327  | 10 | 12 | 47 |
| -CHHR | 0.3327  | 5  | 6  | 20 |
| -CHLT | 0.3327  | 5  | 6  | 51 |
| -CICY | 0.3327  | 5  | 6  | 5  |
| -CIPC | 0.3327  | 5  | 6  | 10 |
| -CIVE | 0.3327  | 5  | 6  | 17 |
| -CLHN | 0.3327  | 5  | 6  | 25 |
| -CNED | 0.3327  | 5  | 6  | 13 |
| -CPPP | 0.3327  | 5  | 6  | 15 |
| -CVIP | 0.3327  | 5  | 6  | 27 |
| -CVNA | 0.3327  | 5  | 6  | 31 |
| -CACC | 0.34221 | 6  | 7  | 9  |
| -CCIE | 0.34221 | 6  | 7  | 14 |
| -CDCI | 0.34221 | 6  | 7  | 6  |
| -CHNS | 0.34221 | 6  | 7  | 25 |
| -CKIL | 0.34221 | 6  | 7  | 25 |
| -CPVA | 0.34221 | 6  | 7  | 40 |
| -CTMP | 0.34221 | 6  | 7  | 31 |
| -CYSO | 0.34221 | 6  | 7  | 18 |
| -CCVP | 0.34934 | 7  | 8  | 30 |
| -CDLC | 0.34934 | 7  | 8  | 20 |
| -CDPS | 0.34934 | 14 | 16 | 31 |
| -CGRR | 0.34934 | 7  | 8  | 31 |
| -CRHA | 0.34934 | 7  | 8  | 27 |
| -CGIL | 0.35488 | 8  | 9  | 26 |
| -CILI | 0.35488 | 8  | 9  | 32 |
| -CTPC | 0.35488 | 8  | 9  | 10 |
| -CDHP | 0.35932 | 9  | 10 | 20 |
| -CSTM | 0.35932 | 9  | 10 | 25 |
| -CSCR | 0.36295 | 10 | 11 | 47 |
| -CSMI | 0.36295 | 10 | 11 | 23 |
| -CTMR | 0.36295 | 10 | 11 | 50 |
| -CLMT | 0.37263 | 14 | 15 | 35 |

|       |         |    |    |    |
|-------|---------|----|----|----|
| -CDDL | 0.37576 | 16 | 17 | 41 |
| -CNLA | 0.38189 | 22 | 23 | 47 |
| -CDVA | 0.39925 | 9  | 9  | 13 |
| -CPSC | 0.39925 | 9  | 9  | 15 |
| -CAAK | 0.39925 | 2  | 2  | 16 |
| -CAAM | 0.39925 | 2  | 2  | 40 |
| -CAAQ | 0.39925 | 1  | 1  | 18 |
| -CACG | 0.39925 | 2  | 2  | 12 |
| -CACH | 0.39925 | 2  | 2  | 17 |
| -CACW | 0.39925 | 2  | 2  | 17 |
| -CACY | 0.39925 | 1  | 1  | 6  |
| -CADM | 0.39925 | 1  | 1  | 6  |
| -CADN | 0.39925 | 1  | 1  | 16 |
| -CADY | 0.39925 | 1  | 1  | 11 |
| -CAED | 0.39925 | 1  | 1  | 8  |
| -CAFF | 0.39925 | 2  | 2  | 7  |
| -CAFI | 0.39925 | 2  | 2  | 11 |
| -CAFW | 0.39925 | 1  | 1  | 11 |
| -CAGM | 0.39925 | 2  | 2  | 20 |
| -CAGQ | 0.39925 | 2  | 2  | 11 |
| -CAGW | 0.39925 | 2  | 2  | 19 |
| -CAHH | 0.39925 | 1  | 1  | 4  |
| -CAHL | 0.39925 | 3  | 3  | 28 |
| -CAHQ | 0.39925 | 1  | 1  | 9  |
| -CAIW | 0.39925 | 1  | 1  | 15 |
| -CANH | 0.39925 | 1  | 1  | 9  |
| -CANN | 0.39925 | 1  | 1  | 11 |
| -CANP | 0.39925 | 1  | 1  | 14 |
| -CAPC | 0.39925 | 1  | 1  | 9  |
| -CAPD | 0.39925 | 2  | 2  | 10 |
| -CAPH | 0.39925 | 2  | 2  | 6  |
| -CAPM | 0.39925 | 1  | 1  | 20 |
| -CAPQ | 0.39925 | 1  | 1  | 12 |
| -CAPT | 0.39925 | 2  | 2  | 30 |
| -CAQC | 0.39925 | 1  | 1  | 6  |
| -CAQH | 0.39925 | 1  | 1  | 10 |
| -CAQI | 0.39925 | 3  | 3  | 4  |
| -CAQM | 0.39925 | 1  | 1  | 16 |
| -CAQP | 0.39925 | 1  | 1  | 9  |
| -CAQQ | 0.39925 | 1  | 1  | 5  |
| -CAQT | 0.39925 | 1  | 1  | 26 |
| -CASQ | 0.39925 | 3  | 3  | 37 |
| -CATH | 0.39925 | 1  | 1  | 16 |
| -CAVN | 0.39925 | 15 | 15 | 34 |
| -CAWH | 0.39925 | 1  | 1  | 10 |
| -CAWV | 0.39925 | 1  | 1  | 19 |
| -CAYC | 0.39925 | 1  | 1  | 9  |
| -CAYF | 0.39925 | 2  | 2  | 13 |
| -CAYH | 0.39925 | 3  | 3  | 11 |
| -CAYQ | 0.39925 | 1  | 1  | 9  |
| -CAYW | 0.39925 | 1  | 1  | 16 |
| -CCAA | 0.39925 | 1  | 1  | 23 |
| -CCAC | 0.39925 | 1  | 1  | 9  |
| -CCAH | 0.39925 | 1  | 1  | 5  |
| -CCCE | 0.39925 | 1  | 1  | 7  |
| -CCCG | 0.39925 | 1  | 1  | 4  |
| -CCCH | 0.39925 | 2  | 2  | 9  |

|       |         |   |   |    |
|-------|---------|---|---|----|
| -CCCI | 0.39925 | 1 | 1 | 2  |
| -CCCK | 0.39925 | 1 | 1 | 12 |
| -CCCW | 0.39925 | 1 | 1 | 9  |
| -CCCY | 0.39925 | 2 | 2 | 9  |
| -CCDA | 0.39925 | 6 | 6 | 11 |
| -CCDC | 0.39925 | 1 | 1 | 5  |
| -CCDF | 0.39925 | 2 | 2 | 2  |
| -CCDN | 0.39925 | 1 | 1 | 17 |
| -CCEA | 0.39925 | 1 | 1 | 4  |
| -CCEG | 0.39925 | 1 | 1 | 7  |
| -CCEM | 0.39925 | 1 | 1 | 2  |
| -CCFD | 0.39925 | 1 | 1 | 1  |
| -CCFG | 0.39925 | 1 | 1 | 13 |
| -CCFH | 0.39925 | 1 | 1 | 5  |
| -CCFK | 0.39925 | 2 | 2 | 8  |
| -CCFN | 0.39925 | 1 | 1 | 3  |
| -CCFW | 0.39925 | 1 | 1 | 15 |
| -CCGH | 0.39925 | 1 | 1 | 7  |
| -CCGI | 0.39925 | 1 | 1 | 6  |
| -CCGQ | 0.39925 | 2 | 2 | 6  |
| -CCGW | 0.39925 | 1 | 1 | 14 |
| -CCHM | 0.39925 | 1 | 1 | 3  |
| -CCHV | 0.39925 | 3 | 3 | 11 |
| -CCIK | 0.39925 | 1 | 1 | 8  |
| -CCIW | 0.39925 | 1 | 1 | 7  |
| -CCKC | 0.39925 | 1 | 1 | 8  |
| -CCKW | 0.39925 | 1 | 1 | 7  |
| -CCKY | 0.39925 | 1 | 1 | 7  |
| -CCLW | 0.39925 | 1 | 1 | 9  |
| -CCMF | 0.39925 | 2 | 2 | 9  |
| -CCMI | 0.39925 | 2 | 2 | 6  |
| -CCMN | 0.39925 | 1 | 1 | 4  |
| -CCNF | 0.39925 | 1 | 1 | 1  |
| -CCNG | 0.39925 | 1 | 1 | 5  |
| -CCNI | 0.39925 | 1 | 1 | 6  |
| -CCNM | 0.39925 | 1 | 1 | 7  |
| -CCNR | 0.39925 | 3 | 3 | 16 |
| -CCNW | 0.39925 | 1 | 1 | 4  |
| -CCNY | 0.39925 | 1 | 1 | 1  |
| -CCPH | 0.39925 | 1 | 1 | 7  |
| -CCQE | 0.39925 | 1 | 1 | 3  |
| -CCQF | 0.39925 | 1 | 1 | 5  |
| -CCQG | 0.39925 | 1 | 1 | 8  |
| -CCQH | 0.39925 | 2 | 2 | 15 |
| -CCQN | 0.39925 | 1 | 1 | 6  |
| -CCQR | 0.39925 | 2 | 2 | 15 |
| -CCQW | 0.39925 | 1 | 1 | 7  |
| -CCRY | 0.39925 | 2 | 2 | 21 |
| -CCSD | 0.39925 | 4 | 4 | 13 |
| -CCSF | 0.39925 | 1 | 1 | 20 |
| -CCTH | 0.39925 | 1 | 1 | 7  |
| -CCVE | 0.39925 | 1 | 1 | 7  |
| -CCVI | 0.39925 | 6 | 6 | 15 |
| -CCWF | 0.39925 | 1 | 1 | 4  |
| -CCWK | 0.39925 | 1 | 1 | 6  |
| -CCWL | 0.39925 | 1 | 1 | 7  |
| -CCWM | 0.39925 | 1 | 1 | 7  |



|       |         |   |   |    |
|-------|---------|---|---|----|
| -CCWP | 0.39925 | 1 | 1 | 7  |
| -CCWS | 0.39925 | 1 | 1 | 18 |
| -CCWT | 0.39925 | 1 | 1 | 5  |
| -CCWV | 0.39925 | 1 | 1 | 5  |
| -CCWW | 0.39925 | 1 | 1 | 5  |
| -CCWY | 0.39925 | 1 | 1 | 16 |
| -CCYH | 0.39925 | 1 | 1 | 2  |
| -CCYI | 0.39925 | 1 | 1 | 7  |
| -CCYN | 0.39925 | 1 | 1 | 8  |
| -CDAW | 0.39925 | 2 | 2 | 13 |
| -CDCC | 0.39925 | 1 | 1 | 6  |
| -CDCW | 0.39925 | 1 | 1 | 5  |
| -CDDP | 0.39925 | 4 | 4 | 10 |
| -CDDW | 0.39925 | 2 | 2 | 7  |
| -CDEG | 0.39925 | 1 | 1 | 6  |
| -CDEN | 0.39925 | 2 | 2 | 12 |
| -CDFE | 0.39925 | 1 | 1 | 2  |
| -CDFI | 0.39925 | 1 | 1 | 1  |
| -CDFW | 0.39925 | 1 | 1 | 10 |
| -CDFY | 0.39925 | 1 | 1 | 6  |
| -CDHI | 0.39925 | 1 | 1 | 3  |
| -CDHW | 0.39925 | 1 | 1 | 13 |
| -CDIY | 0.39925 | 1 | 1 | 5  |
| -CDLH | 0.39925 | 6 | 6 | 24 |
| -CDLW | 0.39925 | 1 | 1 | 20 |
| -CDMI | 0.39925 | 2 | 2 | 3  |
| -CDMP | 0.39925 | 2 | 2 | 18 |
| -CDNI | 0.39925 | 1 | 1 | 7  |
| -CDPH | 0.39925 | 3 | 3 | 11 |
| -CDQA | 0.39925 | 1 | 1 | 8  |
| -CDQE | 0.39925 | 1 | 1 | 2  |
| -CDTA | 0.39925 | 1 | 1 | 6  |
| -CDTK | 0.39925 | 3 | 3 | 14 |
| -CDVK | 0.39925 | 2 | 2 | 17 |
| -CDWC | 0.39925 | 1 | 1 | 1  |
| -CDWF | 0.39925 | 1 | 1 | 2  |
| -CDWH | 0.39925 | 1 | 1 | 6  |
| -CDWI | 0.39925 | 1 | 1 | 5  |
| -CDWK | 0.39925 | 1 | 1 | 10 |
| -CDWP | 0.39925 | 2 | 2 | 11 |
| -CDWT | 0.39925 | 2 | 2 | 18 |
| -CDWY | 0.39925 | 1 | 1 | 8  |
| -CDYC | 0.39925 | 6 | 6 | 7  |
| -CDYF | 0.39925 | 1 | 1 | 16 |
| -CDYH | 0.39925 | 1 | 1 | 14 |
| -CDYI | 0.39925 | 1 | 1 | 8  |
| -CDYW | 0.39925 | 1 | 1 | 2  |
| -CDYY | 0.39925 | 2 | 2 | 9  |
| -CEAF | 0.39925 | 1 | 1 | 6  |
| -CECM | 0.39925 | 3 | 3 | 9  |
| -CECP | 0.39925 | 3 | 3 | 13 |
| -CEDC | 0.39925 | 1 | 1 | 6  |
| -CEDE | 0.39925 | 1 | 1 | 1  |
| -CEDF | 0.39925 | 1 | 1 | 5  |
| -CEDM | 0.39925 | 1 | 1 | 4  |
| -CEEF | 0.39925 | 2 | 2 | 5  |
| -CEEG | 0.39925 | 1 | 1 | 7  |

|       |         |   |   |    |
|-------|---------|---|---|----|
| -CEEI | 0.39925 | 1 | 1 | 3  |
| -CEEQ | 0.39925 | 1 | 1 | 4  |
| -CEFA | 0.39925 | 1 | 1 | 6  |
| -CEFF | 0.39925 | 1 | 1 | 6  |
| -CEFQ | 0.39925 | 1 | 1 | 4  |
| -CEFV | 0.39925 | 1 | 1 | 5  |
| -CEGM | 0.39925 | 1 | 1 | 2  |
| -CEGW | 0.39925 | 1 | 1 | 5  |
| -CEHC | 0.39925 | 1 | 1 | 4  |
| -CEHH | 0.39925 | 1 | 1 | 3  |
| -CEHQ | 0.39925 | 1 | 1 | 5  |
| -CEHY | 0.39925 | 1 | 1 | 6  |
| -CEID | 0.39925 | 1 | 1 | 5  |
| -CEKI | 0.39925 | 1 | 1 | 4  |
| -CEKK | 0.39925 | 1 | 1 | 2  |
| -CEKY | 0.39925 | 1 | 1 | 5  |
| -CELQ | 0.39925 | 2 | 2 | 20 |
| -CEME | 0.39925 | 1 | 1 | 6  |
| -CEMK | 0.39925 | 1 | 1 | 2  |
| -CEMS | 0.39925 | 2 | 2 | 17 |
| -CENY | 0.39925 | 2 | 2 | 8  |
| -CEPE | 0.39925 | 1 | 1 | 12 |
| -CEPI | 0.39925 | 1 | 1 | 5  |
| -CEPK | 0.39925 | 1 | 1 | 11 |
| -CEQD | 0.39925 | 1 | 1 | 6  |
| -CEQE | 0.39925 | 2 | 2 | 9  |
| -CEQF | 0.39925 | 1 | 1 | 4  |
| -CEQH | 0.39925 | 1 | 1 | 9  |
| -CEQM | 0.39925 | 1 | 1 | 7  |
| -CEQP | 0.39925 | 1 | 1 | 8  |
| -CEQQ | 0.39925 | 1 | 1 | 4  |
| -CETM | 0.39925 | 1 | 1 | 23 |
| -CETQ | 0.39925 | 1 | 1 | 8  |
| -CEVF | 0.39925 | 1 | 1 | 8  |
| -CEVQ | 0.39925 | 1 | 1 | 15 |
| -CEWC | 0.39925 | 1 | 1 | 7  |
| -CEWF | 0.39925 | 1 | 1 | 4  |
| -CEWH | 0.39925 | 1 | 1 | 2  |
| -CEWI | 0.39925 | 1 | 1 | 2  |
| -CEWP | 0.39925 | 2 | 2 | 20 |
| -CEWS | 0.39925 | 3 | 3 | 5  |
| -CEWT | 0.39925 | 2 | 2 | 18 |
| -CEWW | 0.39925 | 1 | 1 | 3  |
| -CEWY | 0.39925 | 1 | 1 | 8  |
| -CEYC | 0.39925 | 1 | 1 | 12 |
| -CEYK | 0.39925 | 1 | 1 | 5  |
| -CEYR | 0.39925 | 3 | 3 | 12 |
| -CFAR | 0.39925 | 2 | 2 | 17 |
| -CFAW | 0.39925 | 1 | 1 | 9  |
| -CFCF | 0.39925 | 1 | 1 | 8  |
| -CFCK | 0.39925 | 2 | 2 | 6  |
| -CFCN | 0.39925 | 1 | 1 | 8  |
| -CFDH | 0.39925 | 1 | 1 | 9  |
| -CFDI | 0.39925 | 1 | 1 | 9  |
| -CFDW | 0.39925 | 1 | 1 | 3  |
| -CFEC | 0.39925 | 1 | 1 | 5  |
| -CFEF | 0.39925 | 1 | 1 | 3  |

|       |         |   |   |    |
|-------|---------|---|---|----|
| -CFEW | 0.39925 | 1 | 1 | 2  |
| -CFFC | 0.39925 | 1 | 1 | 9  |
| -CFFD | 0.39925 | 1 | 1 | 5  |
| -CFFF | 0.39925 | 1 | 1 | 7  |
| -CFFN | 0.39925 | 1 | 1 | 9  |
| -CFFQ | 0.39925 | 1 | 1 | 3  |
| -CFFT | 0.39925 | 2 | 2 | 13 |
| -CFFW | 0.39925 | 1 | 1 | 2  |
| -CFFY | 0.39925 | 1 | 1 | 4  |
| -CFGG | 0.39925 | 3 | 3 | 15 |
| -CFHA | 0.39925 | 1 | 1 | 14 |
| -CFHD | 0.39925 | 1 | 1 | 11 |
| -CFHH | 0.39925 | 1 | 1 | 5  |
| -CFHI | 0.39925 | 1 | 1 | 5  |
| -CFHK | 0.39925 | 1 | 1 | 3  |
| -CFHL | 0.39925 | 1 | 1 | 17 |
| -CFHM | 0.39925 | 1 | 1 | 15 |
| -CFHN | 0.39925 | 1 | 1 | 8  |
| -CFHT | 0.39925 | 1 | 1 | 12 |
| -CFIE | 0.39925 | 1 | 1 | 11 |
| -CFIH | 0.39925 | 1 | 1 | 3  |
| -CFIK | 0.39925 | 1 | 1 | 8  |
| -CFIW | 0.39925 | 1 | 1 | 11 |
| -CFKC | 0.39925 | 1 | 1 | 6  |
| -CFKE | 0.39925 | 1 | 1 | 4  |
| -CFKH | 0.39925 | 1 | 1 | 6  |
| -CFKI | 0.39925 | 1 | 1 | 4  |
| -CFKM | 0.39925 | 1 | 1 | 7  |
| -CFKQ | 0.39925 | 2 | 2 | 3  |
| -CFKY | 0.39925 | 1 | 1 | 11 |
| -CFLA | 0.39925 | 3 | 3 | 26 |
| -CFLD | 0.39925 | 1 | 1 | 12 |
| -CFLF | 0.39925 | 2 | 2 | 8  |
| -CFLI | 0.39925 | 2 | 2 | 11 |
| -CFME | 0.39925 | 2 | 2 | 14 |
| -CFMF | 0.39925 | 1 | 1 | 4  |
| -CFMR | 0.39925 | 2 | 2 | 21 |
| -CFMV | 0.39925 | 1 | 1 | 15 |
| -CFMW | 0.39925 | 1 | 1 | 5  |
| -CFNC | 0.39925 | 1 | 1 | 9  |
| -CFNI | 0.39925 | 1 | 1 | 15 |
| -CFNK | 0.39925 | 2 | 2 | 8  |
| -CFNP | 0.39925 | 1 | 1 | 11 |
| -CFPF | 0.39925 | 1 | 1 | 15 |
| -CFPW | 0.39925 | 1 | 1 | 3  |
| -CFQD | 0.39925 | 1 | 1 | 6  |
| -CFQF | 0.39925 | 1 | 1 | 6  |
| -CFRH | 0.39925 | 2 | 2 | 16 |
| -CFSY | 0.39925 | 1 | 1 | 13 |
| -CFTP | 0.39925 | 1 | 1 | 16 |
| -CFVT | 0.39925 | 3 | 3 | 12 |
| -CFWC | 0.39925 | 1 | 1 | 9  |
| -CFWE | 0.39925 | 1 | 1 | 4  |
| -CFWF | 0.39925 | 1 | 1 | 3  |
| -CFWG | 0.39925 | 1 | 1 | 5  |
| -CFWH | 0.39925 | 1 | 1 | 5  |
| -CFWK | 0.39925 | 1 | 1 | 3  |

|       |         |   |   |    |
|-------|---------|---|---|----|
| -CFWM | 0.39925 | 1 | 1 | 11 |
| -CFWT | 0.39925 | 2 | 2 | 21 |
| -CFWV | 0.39925 | 1 | 1 | 9  |
| -CFWW | 0.39925 | 1 | 1 | 5  |
| -CFWY | 0.39925 | 1 | 1 | 5  |
| -CFYA | 0.39925 | 1 | 1 | 8  |
| -CFYC | 0.39925 | 1 | 1 | 3  |
| -CFYD | 0.39925 | 1 | 1 | 6  |
| -CFYF | 0.39925 | 1 | 1 | 6  |
| -CFYG | 0.39925 | 1 | 1 | 6  |
| -CFYH | 0.39925 | 1 | 1 | 9  |
| -CFYI | 0.39925 | 1 | 1 | 17 |
| -CFYL | 0.39925 | 2 | 2 | 21 |
| -CFYP | 0.39925 | 1 | 1 | 7  |
| -CFYW | 0.39925 | 1 | 1 | 8  |
| -CGAG | 0.39925 | 3 | 3 | 8  |
| -CGAH | 0.39925 | 1 | 1 | 7  |
| -CGCW | 0.39925 | 1 | 1 | 8  |
| -CGDI | 0.39925 | 2 | 2 | 8  |
| -CGEC | 0.39925 | 1 | 1 | 12 |
| -CGEF | 0.39925 | 2 | 2 | 24 |
| -CGFC | 0.39925 | 1 | 1 | 7  |
| -CGFE | 0.39925 | 1 | 1 | 7  |
| -CGFL | 0.39925 | 2 | 2 | 22 |
| -CGFM | 0.39925 | 2 | 2 | 11 |
| -CGFN | 0.39925 | 1 | 1 | 2  |
| -CGFW | 0.39925 | 1 | 1 | 6  |
| -CGFY | 0.39925 | 1 | 1 | 8  |
| -CGGC | 0.39925 | 1 | 1 | 5  |
| -CGGW | 0.39925 | 1 | 1 | 18 |
| -CGHE | 0.39925 | 1 | 1 | 8  |
| -CGHF | 0.39925 | 1 | 1 | 1  |
| -CGHW | 0.39925 | 1 | 1 | 2  |
| -CGKN | 0.39925 | 2 | 2 | 13 |
| -CGMF | 0.39925 | 1 | 1 | 10 |
| -CGPQ | 0.39925 | 1 | 1 | 7  |
| -CGQD | 0.39925 | 1 | 1 | 8  |
| -CGQF | 0.39925 | 1 | 1 | 6  |
| -CGQQ | 0.39925 | 1 | 1 | 10 |
| -CGQY | 0.39925 | 1 | 1 | 5  |
| -CGVN | 0.39925 | 2 | 2 | 11 |
| -CGWC | 0.39925 | 1 | 1 | 11 |
| -CGWF | 0.39925 | 1 | 1 | 9  |
| -CGWH | 0.39925 | 1 | 1 | 6  |
| -CGWI | 0.39925 | 1 | 1 | 6  |
| -CGWM | 0.39925 | 1 | 1 | 6  |
| -CGWN | 0.39925 | 2 | 2 | 6  |
| -CGWP | 0.39925 | 1 | 1 | 23 |
| -CGWW | 0.39925 | 1 | 1 | 7  |
| -CGYC | 0.39925 | 2 | 2 | 5  |
| -CGYQ | 0.39925 | 1 | 1 | 13 |
| -CGYT | 0.39925 | 4 | 4 | 23 |
| -CGYW | 0.39925 | 1 | 1 | 6  |
| -CHAC | 0.39925 | 2 | 2 | 18 |
| -CHAM | 0.39925 | 1 | 1 | 17 |
| -CHAS | 0.39925 | 4 | 4 | 33 |
| -CHCA | 0.39925 | 1 | 1 | 5  |

|       |         |   |   |    |
|-------|---------|---|---|----|
| -CHCC | 0.39925 | 1 | 1 | 6  |
| -CHCF | 0.39925 | 1 | 1 | 6  |
| -CHCG | 0.39925 | 1 | 1 | 4  |
| -CHCN | 0.39925 | 1 | 1 | 9  |
| -CHCS | 0.39925 | 2 | 2 | 14 |
| -CHCT | 0.39925 | 1 | 1 | 16 |
| -CHDD | 0.39925 | 2 | 2 | 6  |
| -CHDG | 0.39925 | 1 | 1 | 7  |
| -CHDM | 0.39925 | 1 | 1 | 19 |
| -CHDW | 0.39925 | 2 | 2 | 11 |
| -CHEK | 0.39925 | 1 | 1 | 8  |
| -CHFD | 0.39925 | 1 | 1 | 7  |
| -CHFF | 0.39925 | 1 | 1 | 3  |
| -CHFN | 0.39925 | 1 | 1 | 3  |
| -CHFQ | 0.39925 | 1 | 1 | 8  |
| -CHFT | 0.39925 | 2 | 2 | 9  |
| -CHFY | 0.39925 | 1 | 1 | 5  |
| -CHGM | 0.39925 | 3 | 3 | 4  |
| -CHHC | 0.39925 | 1 | 1 | 6  |
| -CHHF | 0.39925 | 1 | 1 | 3  |
| -CHHK | 0.39925 | 1 | 1 | 4  |
| -CHHM | 0.39925 | 1 | 1 | 12 |
| -CHHW | 0.39925 | 1 | 1 | 3  |
| -CHIH | 0.39925 | 2 | 2 | 14 |
| -CHIP | 0.39925 | 1 | 1 | 3  |
| -CHIW | 0.39925 | 1 | 1 | 10 |
| -CHKC | 0.39925 | 2 | 2 | 3  |
| -CHKD | 0.39925 | 1 | 1 | 2  |
| -CHKI | 0.39925 | 1 | 1 | 10 |
| -CHKM | 0.39925 | 1 | 1 | 3  |
| -CHKN | 0.39925 | 2 | 2 | 8  |
| -CHKW | 0.39925 | 1 | 1 | 9  |
| -CHLF | 0.39925 | 2 | 2 | 15 |
| -CHLY | 0.39925 | 1 | 1 | 12 |
| -CHME | 0.39925 | 1 | 1 | 10 |
| -CHMF | 0.39925 | 1 | 1 | 8  |
| -CHMG | 0.39925 | 3 | 3 | 17 |
| -CHMK | 0.39925 | 1 | 1 | 15 |
| -CHML | 0.39925 | 2 | 2 | 32 |
| -CHMN | 0.39925 | 1 | 1 | 9  |
| -CHMQ | 0.39925 | 1 | 1 | 14 |
| -CHMW | 0.39925 | 1 | 1 | 2  |
| -CHNE | 0.39925 | 2 | 2 | 15 |
| -CHNF | 0.39925 | 1 | 1 | 4  |
| -CHNH | 0.39925 | 1 | 1 | 9  |
| -CHNI | 0.39925 | 1 | 1 | 9  |
| -CHNK | 0.39925 | 1 | 1 | 18 |
| -CHNQ | 0.39925 | 1 | 1 | 15 |
| -CHNW | 0.39925 | 1 | 1 | 5  |
| -CHPD | 0.39925 | 2 | 2 | 7  |
| -CHPF | 0.39925 | 1 | 1 | 11 |
| -CHPI | 0.39925 | 2 | 2 | 23 |
| -CHPM | 0.39925 | 1 | 1 | 12 |
| -CHPW | 0.39925 | 1 | 1 | 13 |
| -CHQC | 0.39925 | 1 | 1 | 6  |
| -CHQE | 0.39925 | 2 | 2 | 17 |
| -CHQM | 0.39925 | 1 | 1 | 16 |

|       |         |   |   |    |
|-------|---------|---|---|----|
| -CHQP | 0.39925 | 1 | 1 | 4  |
| -CHQQ | 0.39925 | 1 | 1 | 9  |
| -CHQT | 0.39925 | 2 | 2 | 13 |
| -CHQW | 0.39925 | 1 | 1 | 13 |
| -CHRC | 0.39925 | 2 | 2 | 22 |
| -CHRD | 0.39925 | 8 | 8 | 10 |
| -CHRY | 0.39925 | 1 | 1 | 14 |
| -CHTH | 0.39925 | 1 | 1 | 12 |
| -CHTM | 0.39925 | 2 | 2 | 28 |
| -CHVF | 0.39925 | 1 | 1 | 13 |
| -CHVN | 0.39925 | 2 | 2 | 14 |
| -CHWK | 0.39925 | 1 | 1 | 6  |
| -CHWQ | 0.39925 | 1 | 1 | 5  |
| -CHWW | 0.39925 | 1 | 1 | 7  |
| -CHWY | 0.39925 | 1 | 1 | 4  |
| -CHYA | 0.39925 | 2 | 2 | 17 |
| -CHYD | 0.39925 | 1 | 1 | 16 |
| -CHYF | 0.39925 | 1 | 1 | 3  |
| -CHYI | 0.39925 | 1 | 1 | 7  |
| -CHYM | 0.39925 | 1 | 1 | 13 |
| -CHYN | 0.39925 | 1 | 1 | 11 |
| -CHYQ | 0.39925 | 1 | 1 | 3  |
| -CHYW | 0.39925 | 1 | 1 | 2  |
| -CHYY | 0.39925 | 1 | 1 | 1  |
| -CIAF | 0.39925 | 1 | 1 | 2  |
| -CIAN | 0.39925 | 1 | 1 | 8  |
| -CIAW | 0.39925 | 1 | 1 | 11 |
| -CICD | 0.39925 | 1 | 1 | 1  |
| -CICE | 0.39925 | 1 | 1 | 4  |
| -CICI | 0.39925 | 2 | 2 | 11 |
| -CICP | 0.39925 | 1 | 1 | 9  |
| -CICW | 0.39925 | 1 | 1 | 7  |
| -CIDF | 0.39925 | 1 | 1 | 17 |
| -CIEC | 0.39925 | 1 | 1 | 6  |
| -CIED | 0.39925 | 1 | 1 | 3  |
| -CIEF | 0.39925 | 1 | 1 | 2  |
| -CIEQ | 0.39925 | 1 | 1 | 15 |
| -CIEW | 0.39925 | 1 | 1 | 5  |
| -CIEY | 0.39925 | 1 | 1 | 7  |
| -CIFA | 0.39925 | 2 | 2 | 10 |
| -CIFE | 0.39925 | 1 | 1 | 3  |
| -CIFF | 0.39925 | 1 | 1 | 12 |
| -CIFI | 0.39925 | 1 | 1 | 7  |
| -CIFN | 0.39925 | 2 | 2 | 5  |
| -CIFP | 0.39925 | 1 | 1 | 5  |
| -CIFW | 0.39925 | 1 | 1 | 8  |
| -CIGW | 0.39925 | 1 | 1 | 10 |
| -CIHF | 0.39925 | 1 | 1 | 9  |
| -CIHM | 0.39925 | 3 | 3 | 7  |
| -CIHP | 0.39925 | 2 | 2 | 10 |
| -CIHQ | 0.39925 | 1 | 1 | 9  |
| -CIHV | 0.39925 | 3 | 3 | 11 |
| -CIIR | 0.39925 | 4 | 4 | 15 |
| -CIKG | 0.39925 | 1 | 1 | 13 |
| -CIKI | 0.39925 | 1 | 1 | 4  |
| -CIKK | 0.39925 | 2 | 2 | 10 |
| -CIMI | 0.39925 | 1 | 1 | 2  |

|       |         |    |    |    |
|-------|---------|----|----|----|
| -CINC | 0.39925 | 1  | 1  | 5  |
| -CINE | 0.39925 | 2  | 2  | 8  |
| -CINP | 0.39925 | 1  | 1  | 5  |
| -CIPH | 0.39925 | 2  | 2  | 17 |
| -CIPQ | 0.39925 | 1  | 1  | 7  |
| -CIQH | 0.39925 | 1  | 1  | 10 |
| -CIQP | 0.39925 | 1  | 1  | 8  |
| -CIQR | 0.39925 | 1  | 1  | 14 |
| -CIRD | 0.39925 | 2  | 2  | 8  |
| -CIRF | 0.39925 | 1  | 1  | 11 |
| -CISF | 0.39925 | 4  | 4  | 23 |
| -CISN | 0.39925 | 2  | 2  | 16 |
| -CITY | 0.39925 | 1  | 1  | 28 |
| -CIVW | 0.39925 | 1  | 1  | 5  |
| -CIWC | 0.39925 | 1  | 1  | 1  |
| -CIWE | 0.39925 | 1  | 1  | 6  |
| -CIWF | 0.39925 | 1  | 1  | 13 |
| -CIWH | 0.39925 | 1  | 1  | 2  |
| -CIWI | 0.39925 | 1  | 1  | 6  |
| -CIWM | 0.39925 | 1  | 1  | 4  |
| -CIWN | 0.39925 | 1  | 1  | 14 |
| -CIWW | 0.39925 | 1  | 1  | 9  |
| -CIWY | 0.39925 | 1  | 1  | 9  |
| -CIYA | 0.39925 | 1  | 1  | 11 |
| -CIYF | 0.39925 | 1  | 1  | 4  |
| -CIYI | 0.39925 | 1  | 1  | 7  |
| -CIYP | 0.39925 | 1  | 1  | 1  |
| -CIYS | 0.39925 | 1  | 1  | 21 |
| -CIYW | 0.39925 | 1  | 1  | 6  |
| -CKCE | 0.39925 | 1  | 1  | 5  |
| -CKCN | 0.39925 | 2  | 2  | 9  |
| -CKCS | 0.39925 | 2  | 2  | 8  |
| -CKCT | 0.39925 | 1  | 1  | 9  |
| -CKDC | 0.39925 | 1  | 1  | 4  |
| -CKDD | 0.39925 | 1  | 1  | 7  |
| -CKDK | 0.39925 | 1  | 1  | 3  |
| -CKDW | 0.39925 | 1  | 1  | 14 |
| -CKDY | 0.39925 | 1  | 1  | 2  |
| -CKEA | 0.39925 | 1  | 1  | 2  |
| -CKEW | 0.39925 | 1  | 1  | 4  |
| -CKFE | 0.39925 | 2  | 2  | 7  |
| -CKFF | 0.39925 | 1  | 1  | 2  |
| -CKFI | 0.39925 | 1  | 1  | 3  |
| -CKFS | 0.39925 | 1  | 1  | 26 |
| -CKFV | 0.39925 | 1  | 1  | 13 |
| -CKFW | 0.39925 | 2  | 2  | 6  |
| -CKGN | 0.39925 | 3  | 3  | 16 |
| -CKHD | 0.39925 | 1  | 1  | 2  |
| -CKHH | 0.39925 | 1  | 1  | 7  |
| -CKHL | 0.39925 | 1  | 1  | 18 |
| -CKHM | 0.39925 | 1  | 1  | 13 |
| -CKHY | 0.39925 | 1  | 1  | 5  |
| -CKIF | 0.39925 | 1  | 1  | 3  |
| -CKIW | 0.39925 | 1  | 1  | 5  |
| -CKKW | 0.39925 | 1  | 1  | 6  |
| -CKLA | 0.39925 | 12 | 12 | 24 |
| -CKMW | 0.39925 | 1  | 1  | 3  |

|       |         |    |    |    |
|-------|---------|----|----|----|
| -CKMY | 0.39925 | 1  | 1  | 14 |
| -CKNI | 0.39925 | 1  | 1  | 3  |
| -CKNK | 0.39925 | 1  | 1  | 12 |
| -CKPA | 0.39925 | 2  | 2  | 15 |
| -CKPC | 0.39925 | 2  | 2  | 7  |
| -CKPQ | 0.39925 | 1  | 1  | 13 |
| -CKPV | 0.39925 | 1  | 1  | 19 |
| -CKQH | 0.39925 | 1  | 1  | 5  |
| -CKQP | 0.39925 | 1  | 1  | 2  |
| -CKQQ | 0.39925 | 1  | 1  | 8  |
| -CKQR | 0.39925 | 1  | 1  | 20 |
| -CKQY | 0.39925 | 1  | 1  | 4  |
| -CKRW | 0.39925 | 2  | 2  | 13 |
| -CKTA | 0.39925 | 12 | 12 | 23 |
| -CKTM | 0.39925 | 1  | 1  | 16 |
| -CKVD | 0.39925 | 2  | 2  | 7  |
| -CKWA | 0.39925 | 1  | 1  | 19 |
| -CKWC | 0.39925 | 1  | 1  | 11 |
| -CKWE | 0.39925 | 1  | 1  | 8  |
| -CKWF | 0.39925 | 1  | 1  | 5  |
| -CKWI | 0.39925 | 1  | 1  | 2  |
| -CKWK | 0.39925 | 1  | 1  | 12 |
| -CKWQ | 0.39925 | 2  | 2  | 3  |
| -CKWR | 0.39925 | 1  | 1  | 8  |
| -CKWY | 0.39925 | 1  | 1  | 7  |
| -CKYC | 0.39925 | 1  | 1  | 18 |
| -CKYG | 0.39925 | 1  | 1  | 8  |
| -CKYI | 0.39925 | 1  | 1  | 3  |
| -CKYN | 0.39925 | 2  | 2  | 7  |
| -CKYQ | 0.39925 | 1  | 1  | 5  |
| -CKYW | 0.39925 | 1  | 1  | 12 |
| -CKYY | 0.39925 | 1  | 1  | 15 |
| -CLFF | 0.39925 | 1  | 1  | 16 |
| -CLFG | 0.39925 | 2  | 2  | 9  |
| -CLFV | 0.39925 | 4  | 4  | 21 |
| -CLFW | 0.39925 | 1  | 1  | 21 |
| -CLFY | 0.39925 | 1  | 1  | 11 |
| -CLHC | 0.39925 | 1  | 1  | 17 |
| -CLHK | 0.39925 | 2  | 2  | 16 |
| -CLIE | 0.39925 | 2  | 2  | 5  |
| -CLMH | 0.39925 | 3  | 3  | 8  |
| -CLWD | 0.39925 | 2  | 2  | 19 |
| -CLWH | 0.39925 | 1  | 1  | 27 |
| -CLWM | 0.39925 | 1  | 1  | 31 |
| -CLWR | 0.39925 | 2  | 2  | 31 |
| -CLWW | 0.39925 | 1  | 1  | 17 |
| -CLWY | 0.39925 | 1  | 1  | 7  |
| -CLYQ | 0.39925 | 2  | 2  | 18 |
| -CMAA | 0.39925 | 1  | 1  | 10 |
| -CMCC | 0.39925 | 1  | 1  | 2  |
| -CMCI | 0.39925 | 1  | 1  | 4  |
| -CMCK | 0.39925 | 1  | 1  | 2  |
| -CMCN | 0.39925 | 1  | 1  | 8  |
| -CMCT | 0.39925 | 1  | 1  | 7  |
| -CMCW | 0.39925 | 1  | 1  | 5  |
| -CMCY | 0.39925 | 1  | 1  | 14 |
| -CMDC | 0.39925 | 1  | 1  | 1  |



|       |         |   |   |    |
|-------|---------|---|---|----|
| -CMDE | 0.39925 | 1 | 1 | 1  |
| -CMDF | 0.39925 | 1 | 1 | 4  |
| -CMDW | 0.39925 | 1 | 1 | 2  |
| -CMDY | 0.39925 | 1 | 1 | 8  |
| -CMEA | 0.39925 | 1 | 1 | 6  |
| -CMEC | 0.39925 | 1 | 1 | 8  |
| -CMEI | 0.39925 | 1 | 1 | 8  |
| -CMEW | 0.39925 | 1 | 1 | 10 |
| -CMEY | 0.39925 | 1 | 1 | 16 |
| -CMFC | 0.39925 | 1 | 1 | 3  |
| -CMFD | 0.39925 | 1 | 1 | 3  |
| -CMFF | 0.39925 | 1 | 1 | 4  |
| -CMFH | 0.39925 | 1 | 1 | 5  |
| -CMFK | 0.39925 | 1 | 1 | 10 |
| -CMFL | 0.39925 | 2 | 2 | 31 |
| -CMFN | 0.39925 | 3 | 3 | 13 |
| -CMFP | 0.39925 | 1 | 1 | 6  |
| -CMFY | 0.39925 | 1 | 1 | 12 |
| -CMGD | 0.39925 | 2 | 2 | 8  |
| -CMGW | 0.39925 | 1 | 1 | 7  |
| -CMHC | 0.39925 | 1 | 1 | 8  |
| -CMHF | 0.39925 | 1 | 1 | 6  |
| -CMHG | 0.39925 | 1 | 1 | 11 |
| -CMHH | 0.39925 | 1 | 1 | 2  |
| -CMHQ | 0.39925 | 1 | 1 | 7  |
| -CMKF | 0.39925 | 1 | 1 | 5  |
| -CMKH | 0.39925 | 1 | 1 | 3  |
| -CMKV | 0.39925 | 1 | 1 | 10 |
| -CMKW | 0.39925 | 2 | 2 | 11 |
| -CMME | 0.39925 | 1 | 1 | 2  |
| -CMMI | 0.39925 | 1 | 1 | 8  |
| -CMMN | 0.39925 | 1 | 1 | 9  |
| -CMMV | 0.39925 | 1 | 1 | 11 |
| -CMMW | 0.39925 | 1 | 1 | 2  |
| -CMMY | 0.39925 | 1 | 1 | 5  |
| -CMNF | 0.39925 | 2 | 2 | 7  |
| -CMNQ | 0.39925 | 2 | 2 | 10 |
| -CMNY | 0.39925 | 1 | 1 | 10 |
| -CMPG | 0.39925 | 1 | 1 | 5  |
| -CMPW | 0.39925 | 1 | 1 | 17 |
| -CMQC | 0.39925 | 1 | 1 | 9  |
| -CMQF | 0.39925 | 1 | 1 | 8  |
| -CMQH | 0.39925 | 1 | 1 | 6  |
| -CMQM | 0.39925 | 1 | 1 | 4  |
| -CMQN | 0.39925 | 1 | 1 | 9  |
| -CMQP | 0.39925 | 1 | 1 | 2  |
| -CMQQ | 0.39925 | 1 | 1 | 6  |
| -CMQY | 0.39925 | 1 | 1 | 4  |
| -CMRF | 0.39925 | 1 | 1 | 11 |
| -CMRM | 0.39925 | 1 | 1 | 7  |
| -CMSC | 0.39925 | 3 | 3 | 17 |
| -CMSF | 0.39925 | 1 | 1 | 14 |
| -CMTM | 0.39925 | 3 | 3 | 21 |
| -CMVN | 0.39925 | 7 | 7 | 16 |
| -CMVP | 0.39925 | 2 | 2 | 19 |
| -CMWC | 0.39925 | 1 | 1 | 7  |
| -CMWG | 0.39925 | 1 | 1 | 12 |

|       |         |   |   |    |
|-------|---------|---|---|----|
| -CMWH | 0.39925 | 1 | 1 | 10 |
| -CMWI | 0.39925 | 1 | 1 | 9  |
| -CMWL | 0.39925 | 1 | 1 | 16 |
| -CMWM | 0.39925 | 1 | 1 | 8  |
| -CMWN | 0.39925 | 1 | 1 | 11 |
| -CMWP | 0.39925 | 1 | 1 | 17 |
| -CMWQ | 0.39925 | 4 | 4 | 7  |
| -CMWW | 0.39925 | 1 | 1 | 3  |
| -CMWY | 0.39925 | 1 | 1 | 6  |
| -CMYC | 0.39925 | 1 | 1 | 9  |
| -CMYF | 0.39925 | 1 | 1 | 3  |
| -CMYM | 0.39925 | 1 | 1 | 8  |
| -CMYN | 0.39925 | 1 | 1 | 12 |
| -CMYR | 0.39925 | 2 | 2 | 11 |
| -CMYT | 0.39925 | 2 | 2 | 14 |
| -CMYW | 0.39925 | 1 | 1 | 5  |
| -CMYY | 0.39925 | 1 | 1 | 11 |
| -CNAK | 0.39925 | 2 | 2 | 16 |
| -CNAP | 0.39925 | 2 | 2 | 10 |
| -CNCA | 0.39925 | 1 | 1 | 6  |
| -CNCC | 0.39925 | 1 | 1 | 5  |
| -CNCD | 0.39925 | 1 | 1 | 4  |
| -CNCP | 0.39925 | 3 | 3 | 6  |
| -CNCR | 0.39925 | 2 | 2 | 10 |
| -CNCW | 0.39925 | 1 | 1 | 6  |
| -CNDC | 0.39925 | 1 | 1 | 5  |
| -CNDH | 0.39925 | 4 | 4 | 6  |
| -CNDI | 0.39925 | 1 | 1 | 6  |
| -CNEG | 0.39925 | 2 | 2 | 9  |
| -CNEN | 0.39925 | 1 | 1 | 8  |
| -CNFD | 0.39925 | 1 | 1 | 2  |
| -CNFQ | 0.39925 | 1 | 1 | 5  |
| -CNFY | 0.39925 | 1 | 1 | 3  |
| -CNGC | 0.39925 | 1 | 1 | 10 |
| -CNHH | 0.39925 | 1 | 1 | 7  |
| -CNIW | 0.39925 | 1 | 1 | 8  |
| -CNKE | 0.39925 | 1 | 1 | 7  |
| -CNMA | 0.39925 | 2 | 2 | 15 |
| -CNMH | 0.39925 | 1 | 1 | 11 |
| -CNMI | 0.39925 | 1 | 1 | 5  |
| -CNNE | 0.39925 | 1 | 1 | 8  |
| -CNNI | 0.39925 | 1 | 1 | 6  |
| -CNPY | 0.39925 | 2 | 2 | 11 |
| -CNQH | 0.39925 | 1 | 1 | 5  |
| -CNQI | 0.39925 | 1 | 1 | 9  |
| -CNQL | 0.39925 | 1 | 1 | 30 |
| -CNQQ | 0.39925 | 1 | 1 | 6  |
| -CNQT | 0.39925 | 1 | 1 | 10 |
| -CNRE | 0.39925 | 1 | 1 | 23 |
| -CNRH | 0.39925 | 1 | 1 | 22 |
| -CNVW | 0.39925 | 1 | 1 | 17 |
| -CNWC | 0.39925 | 1 | 1 | 6  |
| -CNWF | 0.39925 | 1 | 1 | 4  |
| -CNWI | 0.39925 | 1 | 1 | 4  |
| -CNYC | 0.39925 | 1 | 1 | 6  |
| -CNYQ | 0.39925 | 1 | 1 | 3  |
| -CNYW | 0.39925 | 1 | 1 | 3  |

|        |         |   |   |    |
|--------|---------|---|---|----|
| -CNY Y | 0.39925 | 1 | 1 | 17 |
| -CPAQ  | 0.39925 | 1 | 1 | 7  |
| -CPCC  | 0.39925 | 1 | 1 | 11 |
| -CPCG  | 0.39925 | 3 | 3 | 16 |
| -CPDH  | 0.39925 | 4 | 4 | 16 |
| -CPFF  | 0.39925 | 1 | 1 | 6  |
| -CPFT  | 0.39925 | 1 | 1 | 18 |
| -CPFW  | 0.39925 | 1 | 1 | 12 |
| -CPFY  | 0.39925 | 2 | 2 | 13 |
| -CPHF  | 0.39925 | 1 | 1 | 6  |
| -CPHQ  | 0.39925 | 1 | 1 | 16 |
| -CPKI  | 0.39925 | 1 | 1 | 13 |
| -CPLH  | 0.39925 | 1 | 1 | 26 |
| -CPMF  | 0.39925 | 1 | 1 | 13 |
| -CPMQ  | 0.39925 | 1 | 1 | 11 |
| -CPPW  | 0.39925 | 1 | 1 | 4  |
| -CPQD  | 0.39925 | 1 | 1 | 4  |
| -CPQH  | 0.39925 | 2 | 2 | 15 |
| -CPQM  | 0.39925 | 1 | 1 | 7  |
| -CPQN  | 0.39925 | 1 | 1 | 11 |
| -CPQQ  | 0.39925 | 1 | 1 | 12 |
| -CPRH  | 0.39925 | 2 | 2 | 24 |
| -CPRW  | 0.39925 | 1 | 1 | 18 |
| -CPWA  | 0.39925 | 1 | 1 | 18 |
| -CPWC  | 0.39925 | 1 | 1 | 2  |
| -CPWD  | 0.39925 | 2 | 2 | 11 |
| -CPWG  | 0.39925 | 1 | 1 | 18 |
| -CPWH  | 0.39925 | 1 | 1 | 7  |
| -CPWM  | 0.39925 | 2 | 2 | 18 |
| -CPWN  | 0.39925 | 1 | 1 | 13 |
| -CPYH  | 0.39925 | 1 | 1 | 11 |
| -CPYI  | 0.39925 | 1 | 1 | 10 |
| -CQAF  | 0.39925 | 1 | 1 | 12 |
| -CQCC  | 0.39925 | 1 | 1 | 8  |
| -CQCD  | 0.39925 | 1 | 1 | 2  |
| -CQCH  | 0.39925 | 1 | 1 | 7  |
| -CQCI  | 0.39925 | 3 | 3 | 10 |
| -CQCK  | 0.39925 | 1 | 1 | 4  |
| -CQCW  | 0.39925 | 1 | 1 | 3  |
| -CQCY  | 0.39925 | 1 | 1 | 11 |
| -CQDC  | 0.39925 | 1 | 1 | 3  |
| -CQDF  | 0.39925 | 1 | 1 | 6  |
| -CQDM  | 0.39925 | 1 | 1 | 6  |
| -CQDN  | 0.39925 | 1 | 1 | 8  |
| -CQDW  | 0.39925 | 1 | 1 | 5  |
| -CQEA  | 0.39925 | 1 | 1 | 3  |
| -CQEC  | 0.39925 | 1 | 1 | 1  |
| -CQEF  | 0.39925 | 1 | 1 | 4  |
| -CQEI  | 0.39925 | 1 | 1 | 7  |
| -CQFF  | 0.39925 | 1 | 1 | 9  |
| -CQFH  | 0.39925 | 1 | 1 | 5  |
| -CQFL  | 0.39925 | 1 | 1 | 10 |
| -CQFN  | 0.39925 | 1 | 1 | 6  |
| -CQFQ  | 0.39925 | 1 | 1 | 14 |
| -CQFT  | 0.39925 | 2 | 2 | 12 |
| -CQFY  | 0.39925 | 1 | 1 | 11 |
| -CQHA  | 0.39925 | 1 | 1 | 3  |

|       |         |   |   |    |
|-------|---------|---|---|----|
| -CQHC | 0.39925 | 1 | 1 | 4  |
| -CQHE | 0.39925 | 1 | 1 | 2  |
| -CQHF | 0.39925 | 1 | 1 | 4  |
| -CQHG | 0.39925 | 1 | 1 | 7  |
| -CQHH | 0.39925 | 2 | 2 | 6  |
| -CQHI | 0.39925 | 1 | 1 | 5  |
| -CQHK | 0.39925 | 1 | 1 | 6  |
| -CQHN | 0.39925 | 1 | 1 | 4  |
| -CQHP | 0.39925 | 1 | 1 | 6  |
| -CQHQ | 0.39925 | 1 | 1 | 11 |
| -CQHW | 0.39925 | 1 | 1 | 10 |
| -CQHY | 0.39925 | 1 | 1 | 10 |
| -CQIW | 0.39925 | 1 | 1 | 5  |
| -CQKA | 0.39925 | 1 | 1 | 8  |
| -CQKC | 0.39925 | 1 | 1 | 10 |
| -CQKH | 0.39925 | 2 | 2 | 2  |
| -CQKQ | 0.39925 | 1 | 1 | 6  |
| -CQKW | 0.39925 | 1 | 1 | 2  |
| -CQLF | 0.39925 | 2 | 2 | 16 |
| -CQMY | 0.39925 | 1 | 1 | 6  |
| -CQNF | 0.39925 | 1 | 1 | 2  |
| -CQNK | 0.39925 | 1 | 1 | 22 |
| -CQNN | 0.39925 | 1 | 1 | 3  |
| -CQNW | 0.39925 | 1 | 1 | 3  |
| -CQPC | 0.39925 | 1 | 1 | 2  |
| -CQPD | 0.39925 | 1 | 1 | 2  |
| -CQPE | 0.39925 | 1 | 1 | 4  |
| -CQPF | 0.39925 | 1 | 1 | 9  |
| -CQPG | 0.39925 | 1 | 1 | 6  |
| -CQPH | 0.39925 | 1 | 1 | 7  |
| -CQPI | 0.39925 | 1 | 1 | 17 |
| -CQPK | 0.39925 | 1 | 1 | 4  |
| -CQPM | 0.39925 | 1 | 1 | 7  |
| -CQPN | 0.39925 | 2 | 2 | 12 |
| -CQPP | 0.39925 | 1 | 1 | 10 |
| -CQPQ | 0.39925 | 1 | 1 | 11 |
| -CQPR | 0.39925 | 1 | 1 | 21 |
| -CQPT | 0.39925 | 1 | 1 | 11 |
| -CQPV | 0.39925 | 1 | 1 | 12 |
| -CQPW | 0.39925 | 1 | 1 | 12 |
| -CQQA | 0.39925 | 2 | 2 | 14 |
| -CQQE | 0.39925 | 1 | 1 | 1  |
| -CQQF | 0.39925 | 1 | 1 | 10 |
| -CQQH | 0.39925 | 1 | 1 | 10 |
| -CQQK | 0.39925 | 1 | 1 | 6  |
| -CQQM | 0.39925 | 1 | 1 | 4  |
| -CQQP | 0.39925 | 1 | 1 | 6  |
| -CQQQ | 0.39925 | 1 | 1 | 1  |
| -CQQY | 0.39925 | 1 | 1 | 3  |
| -CQRW | 0.39925 | 1 | 1 | 7  |
| -CQSK | 0.39925 | 1 | 1 | 8  |
| -CQTH | 0.39925 | 1 | 1 | 11 |
| -CQTM | 0.39925 | 1 | 1 | 40 |
| -CQVF | 0.39925 | 2 | 2 | 8  |
| -CQVH | 0.39925 | 1 | 1 | 6  |
| -CQWA | 0.39925 | 1 | 1 | 10 |
| -CQWC | 0.39925 | 1 | 1 | 2  |

|       |         |    |    |    |
|-------|---------|----|----|----|
| -CQWD | 0.39925 | 2  | 2  | 3  |
| -CQWE | 0.39925 | 1  | 1  | 5  |
| -CQWF | 0.39925 | 1  | 1  | 8  |
| -CQWH | 0.39925 | 1  | 1  | 5  |
| -CQWI | 0.39925 | 1  | 1  | 1  |
| -CQWK | 0.39925 | 1  | 1  | 7  |
| -CQWM | 0.39925 | 1  | 1  | 3  |
| -CQWN | 0.39925 | 1  | 1  | 10 |
| -CQWQ | 0.39925 | 2  | 2  | 11 |
| -CQWR | 0.39925 | 1  | 1  | 8  |
| -CQWW | 0.39925 | 1  | 1  | 5  |
| -CQWY | 0.39925 | 1  | 1  | 13 |
| -CQYE | 0.39925 | 1  | 1  | 3  |
| -CQYM | 0.39925 | 1  | 1  | 5  |
| -CQYQ | 0.39925 | 1  | 1  | 4  |
| -CQYW | 0.39925 | 1  | 1  | 3  |
| -CQYY | 0.39925 | 1  | 1  | 4  |
| -CRAF | 0.39925 | 1  | 1  | 16 |
| -CRCH | 0.39925 | 2  | 2  | 12 |
| -CRCK | 0.39925 | 2  | 2  | 15 |
| -CRFA | 0.39925 | 6  | 6  | 25 |
| -CRFH | 0.39925 | 2  | 2  | 15 |
| -CRFV | 0.39925 | 2  | 2  | 35 |
| -CRHK | 0.39925 | 2  | 2  | 32 |
| -CRHM | 0.39925 | 2  | 2  | 39 |
| -CRHW | 0.39925 | 1  | 1  | 7  |
| -CRIY | 0.39925 | 2  | 2  | 6  |
| -CRKC | 0.39925 | 1  | 1  | 12 |
| -CRLI | 0.39925 | 12 | 12 | 36 |
| -CRMI | 0.39925 | 6  | 6  | 19 |
| -CRNK | 0.39925 | 1  | 1  | 19 |
| -CRNW | 0.39925 | 1  | 1  | 10 |
| -CRQF | 0.39925 | 1  | 1  | 18 |
| -CRQH | 0.39925 | 1  | 1  | 13 |
| -CRQP | 0.39925 | 1  | 1  | 10 |
| -CRSC | 0.39925 | 15 | 15 | 40 |
| -CRWA | 0.39925 | 2  | 2  | 24 |
| -CRWH | 0.39925 | 1  | 1  | 15 |
| -CRWI | 0.39925 | 1  | 1  | 21 |
| -CRYA | 0.39925 | 6  | 6  | 32 |
| -CRYI | 0.39925 | 1  | 1  | 7  |
| -CRYM | 0.39925 | 1  | 1  | 26 |
| -CRYW | 0.39925 | 1  | 1  | 18 |
| -CSCI | 0.39925 | 2  | 2  | 12 |
| -CSCW | 0.39925 | 1  | 1  | 12 |
| -CSFI | 0.39925 | 1  | 1  | 16 |
| -CSHQ | 0.39925 | 2  | 2  | 21 |
| -CSIW | 0.39925 | 1  | 1  | 18 |
| -CSMW | 0.39925 | 1  | 1  | 17 |
| -CSNQ | 0.39925 | 1  | 1  | 9  |
| -CSPM | 0.39925 | 1  | 1  | 39 |
| -CSQH | 0.39925 | 2  | 2  | 21 |
| -CSQL | 0.39925 | 6  | 6  | 26 |
| -CSQM | 0.39925 | 2  | 2  | 25 |
| -CSQP | 0.39925 | 1  | 1  | 9  |
| -CSSH | 0.39925 | 4  | 4  | 19 |
| -CSWA | 0.39925 | 2  | 2  | 14 |

|       |         |   |   |    |
|-------|---------|---|---|----|
| -CSWM | 0.39925 | 1 | 1 | 11 |
| -CSWR | 0.39925 | 2 | 2 | 44 |
| -CSYM | 0.39925 | 2 | 2 | 30 |
| -CTCK | 0.39925 | 1 | 1 | 12 |
| -CTCL | 0.39925 | 8 | 8 | 44 |
| -CTCN | 0.39925 | 2 | 2 | 19 |
| -CTCY | 0.39925 | 2 | 2 | 19 |
| -CTEM | 0.39925 | 2 | 2 | 10 |
| -CTHC | 0.39925 | 2 | 2 | 23 |
| -CTHH | 0.39925 | 4 | 4 | 8  |
| -CTHM | 0.39925 | 1 | 1 | 11 |
| -CTHP | 0.39925 | 2 | 2 | 25 |
| -CTIK | 0.39925 | 2 | 2 | 18 |
| -CTIW | 0.39925 | 1 | 1 | 17 |
| -CTLW | 0.39925 | 1 | 1 | 47 |
| -CTNY | 0.39925 | 1 | 1 | 14 |
| -CTPQ | 0.39925 | 1 | 1 | 16 |
| -CTQP | 0.39925 | 1 | 1 | 7  |
| -CTQY | 0.39925 | 1 | 1 | 15 |
| -CTRY | 0.39925 | 2 | 2 | 24 |
| -CTWH | 0.39925 | 1 | 1 | 9  |
| -CTWI | 0.39925 | 1 | 1 | 4  |
| -CTWN | 0.39925 | 1 | 1 | 18 |
| -CTWW | 0.39925 | 1 | 1 | 6  |
| -CTWY | 0.39925 | 1 | 1 | 8  |
| -CTYP | 0.39925 | 1 | 1 | 21 |
| -CTYY | 0.39925 | 1 | 1 | 7  |
| -CVDK | 0.39925 | 1 | 1 | 2  |
| -CVFH | 0.39925 | 1 | 1 | 7  |
| -CVFL | 0.39925 | 2 | 2 | 48 |
| -CVFQ | 0.39925 | 1 | 1 | 20 |
| -CVFW | 0.39925 | 1 | 1 | 24 |
| -CVFY | 0.39925 | 1 | 1 | 12 |
| -CVGQ | 0.39925 | 2 | 2 | 11 |
| -CVHC | 0.39925 | 2 | 2 | 16 |
| -CVHH | 0.39925 | 1 | 1 | 8  |
| -CVHY | 0.39925 | 1 | 1 | 11 |
| -CVKY | 0.39925 | 3 | 3 | 14 |
| -CVLY | 0.39925 | 7 | 7 | 40 |
| -CVNG | 0.39925 | 4 | 4 | 21 |
| -CVNM | 0.39925 | 8 | 8 | 13 |
| -CVNQ | 0.39925 | 1 | 1 | 14 |
| -CVQF | 0.39925 | 1 | 1 | 10 |
| -CVQH | 0.39925 | 1 | 1 | 6  |
| -CVQQ | 0.39925 | 1 | 1 | 11 |
| -CVSH | 0.39925 | 2 | 2 | 12 |
| -CVWF | 0.39925 | 1 | 1 | 18 |
| -CVWN | 0.39925 | 1 | 1 | 17 |
| -CVWY | 0.39925 | 1 | 1 | 7  |
| -CVYA | 0.39925 | 1 | 1 | 26 |
| -CVYC | 0.39925 | 1 | 1 | 15 |
| -CVYQ | 0.39925 | 1 | 1 | 16 |
| -CVYW | 0.39925 | 1 | 1 | 15 |
| -CWAC | 0.39925 | 1 | 1 | 11 |
| -CWAD | 0.39925 | 2 | 2 | 6  |
| -CWAF | 0.39925 | 1 | 1 | 6  |
| -CWAH | 0.39925 | 1 | 1 | 3  |

|       |         |   |   |    |
|-------|---------|---|---|----|
| -CWAQ | 0.39925 | 6 | 6 | 3  |
| -CWAV | 0.39925 | 2 | 2 | 10 |
| -CWAY | 0.39925 | 2 | 2 | 11 |
| -CWCC | 0.39925 | 1 | 1 | 5  |
| -CWCF | 0.39925 | 1 | 1 | 6  |
| -CWCG | 0.39925 | 1 | 1 | 9  |
| -CWCI | 0.39925 | 1 | 1 | 3  |
| -CWCN | 0.39925 | 1 | 1 | 5  |
| -CWCT | 0.39925 | 1 | 1 | 19 |
| -CWCW | 0.39925 | 1 | 1 | 2  |
| -CWCY | 0.39925 | 1 | 1 | 3  |
| -CWDA | 0.39925 | 1 | 1 | 2  |
| -CWDC | 0.39925 | 1 | 1 | 5  |
| -CWDD | 0.39925 | 1 | 1 | 5  |
| -CWDF | 0.39925 | 1 | 1 | 7  |
| -CWDN | 0.39925 | 1 | 1 | 7  |
| -CWDP | 0.39925 | 1 | 1 | 3  |
| -CWDV | 0.39925 | 1 | 1 | 4  |
| -CWDW | 0.39925 | 1 | 1 | 2  |
| -CWEE | 0.39925 | 1 | 1 | 1  |
| -CWEF | 0.39925 | 2 | 2 | 9  |
| -CWEI | 0.39925 | 1 | 1 | 4  |
| -CWEK | 0.39925 | 1 | 1 | 6  |
| -CWEQ | 0.39925 | 1 | 1 | 3  |
| -CWEY | 0.39925 | 1 | 1 | 10 |
| -CWFA | 0.39925 | 1 | 1 | 9  |
| -CWFC | 0.39925 | 1 | 1 | 9  |
| -CWFD | 0.39925 | 1 | 1 | 12 |
| -CWFE | 0.39925 | 1 | 1 | 6  |
| -CWFF | 0.39925 | 1 | 1 | 3  |
| -CWFI | 0.39925 | 1 | 1 | 8  |
| -CWFK | 0.39925 | 2 | 2 | 5  |
| -CWFP | 0.39925 | 1 | 1 | 14 |
| -CWFT | 0.39925 | 1 | 1 | 10 |
| -CWFV | 0.39925 | 1 | 1 | 9  |
| -CWFW | 0.39925 | 1 | 1 | 4  |
| -CWFY | 0.39925 | 1 | 1 | 5  |
| -CWGF | 0.39925 | 1 | 1 | 4  |
| -CWGH | 0.39925 | 1 | 1 | 1  |
| -CWGK | 0.39925 | 1 | 1 | 6  |
| -CWGM | 0.39925 | 2 | 2 | 10 |
| -CWGQ | 0.39925 | 1 | 1 | 1  |
| -CWH  | 0.39925 | 1 | 1 | 9  |
| -CWH  | 0.39925 | 1 | 1 | 4  |
| -CWH  | 0.39925 | 1 | 1 | 4  |
| -CWH  | 0.39925 | 1 | 1 | 1  |
| -CWH  | 0.39925 | 1 | 1 | 16 |
| -CWH  | 0.39925 | 1 | 1 | 6  |
| -CWH  | 0.39925 | 1 | 1 | 8  |
| -CWH  | 0.39925 | 1 | 1 | 22 |
| -CWH  | 0.39925 | 2 | 2 | 13 |
| -CWH  | 0.39925 | 2 | 2 | 16 |
| -CWH  | 0.39925 | 1 | 1 | 9  |
| -CWH  | 0.39925 | 1 | 1 | 8  |
| -CWH  | 0.39925 | 1 | 1 | 3  |
| -CWH  | 0.39925 | 1 | 1 | 7  |
| -CWH  | 0.39925 | 1 | 1 | 1  |

|       |         |   |   |    |
|-------|---------|---|---|----|
| -CWIR | 0.39925 | 1 | 1 | 13 |
| -CWIW | 0.39925 | 1 | 1 | 3  |
| -CWIY | 0.39925 | 1 | 1 | 11 |
| -CWKF | 0.39925 | 1 | 1 | 2  |
| -CWKK | 0.39925 | 1 | 1 | 4  |
| -CWKL | 0.39925 | 2 | 2 | 8  |
| -CWKM | 0.39925 | 1 | 1 | 7  |
| -CWKQ | 0.39925 | 1 | 1 | 2  |
| -CWKR | 0.39925 | 1 | 1 | 16 |
| -CWKV | 0.39925 | 1 | 1 | 4  |
| -CWKW | 0.39925 | 1 | 1 | 7  |
| -CWLF | 0.39925 | 1 | 1 | 17 |
| -CWLX | 0.39925 | 2 | 2 | 47 |
| -CWLW | 0.39925 | 1 | 1 | 13 |
| -CWMA | 0.39925 | 1 | 1 | 5  |
| -CWMC | 0.39925 | 2 | 2 | 6  |
| -CWMD | 0.39925 | 1 | 1 | 5  |
| -CWME | 0.39925 | 1 | 1 | 2  |
| -CWMH | 0.39925 | 1 | 1 | 2  |
| -CWMI | 0.39925 | 1 | 1 | 7  |
| -CWMS | 0.39925 | 3 | 3 | 15 |
| -CMMW | 0.39925 | 1 | 1 | 9  |
| -CWMY | 0.39925 | 1 | 1 | 6  |
| -CWNC | 0.39925 | 1 | 1 | 3  |
| -CWND | 0.39925 | 1 | 1 | 7  |
| -CWNH | 0.39925 | 1 | 1 | 11 |
| -CWNM | 0.39925 | 1 | 1 | 1  |
| -CWNN | 0.39925 | 1 | 1 | 6  |
| -CWNQ | 0.39925 | 1 | 1 | 8  |
| -CWNW | 0.39925 | 1 | 1 | 5  |
| -CWNY | 0.39925 | 1 | 1 | 6  |
| -CWPF | 0.39925 | 1 | 1 | 6  |
| -CWPP | 0.39925 | 1 | 1 | 5  |
| -CWPV | 0.39925 | 1 | 1 | 15 |
| -CWPW | 0.39925 | 1 | 1 | 13 |
| -CWPY | 0.39925 | 1 | 1 | 20 |
| -CWQF | 0.39925 | 1 | 1 | 3  |
| -CWQH | 0.39925 | 1 | 1 | 4  |
| -CWQI | 0.39925 | 1 | 1 | 5  |
| -CWQL | 0.39925 | 1 | 1 | 13 |
| -CWQP | 0.39925 | 1 | 1 | 5  |
| -CWQW | 0.39925 | 1 | 1 | 8  |
| -CWQY | 0.39925 | 1 | 1 | 21 |
| -CWRG | 0.39925 | 1 | 1 | 8  |
| -CWRH | 0.39925 | 1 | 1 | 20 |
| -CWRI | 0.39925 | 1 | 1 | 8  |
| -CWRM | 0.39925 | 2 | 2 | 28 |
| -CWRN | 0.39925 | 2 | 2 | 15 |
| -CWRY | 0.39925 | 2 | 2 | 9  |
| -CWSF | 0.39925 | 1 | 1 | 12 |
| -CWSY | 0.39925 | 2 | 2 | 15 |
| -CWTM | 0.39925 | 2 | 2 | 19 |
| -CWTN | 0.39925 | 1 | 1 | 9  |
| -CWTW | 0.39925 | 1 | 1 | 9  |
| -CWTY | 0.39925 | 1 | 1 | 6  |
| -CWVE | 0.39925 | 1 | 1 | 7  |
| -CWVF | 0.39925 | 1 | 1 | 9  |



|       |         |   |   |    |
|-------|---------|---|---|----|
| -CJVH | 0.39925 | 1 | 1 | 6  |
| -CJVL | 0.39925 | 2 | 2 | 18 |
| -CJVP | 0.39925 | 1 | 1 | 11 |
| -CJVR | 0.39925 | 2 | 2 | 23 |
| -CJVW | 0.39925 | 1 | 1 | 13 |
| -CJVY | 0.39925 | 1 | 1 | 4  |
| -CJWA | 0.39925 | 2 | 2 | 6  |
| -CJWC | 0.39925 | 1 | 1 | 7  |
| -CJWD | 0.39925 | 1 | 1 | 2  |
| -CJWE | 0.39925 | 1 | 1 | 3  |
| -CJWF | 0.39925 | 1 | 1 | 19 |
| -CJWH | 0.39925 | 1 | 1 | 11 |
| -CJWI | 0.39925 | 1 | 1 | 4  |
| -CJWN | 0.39925 | 1 | 1 | 2  |
| -CJWQ | 0.39925 | 1 | 1 | 12 |
| -CJWT | 0.39925 | 1 | 1 | 15 |
| -CJWV | 0.39925 | 1 | 1 | 5  |
| -CJWW | 0.39925 | 1 | 1 | 4  |
| -CJYC | 0.39925 | 1 | 1 | 4  |
| -CJYF | 0.39925 | 1 | 1 | 10 |
| -CJYG | 0.39925 | 2 | 2 | 8  |
| -CJYN | 0.39925 | 1 | 1 | 7  |
| -CJYP | 0.39925 | 2 | 2 | 12 |
| -CJYT | 0.39925 | 1 | 1 | 12 |
| -CJYW | 0.39925 | 1 | 1 | 6  |
| -CJYY | 0.39925 | 1 | 1 | 4  |
| -CYAC | 0.39925 | 1 | 1 | 3  |
| -CYAM | 0.39925 | 1 | 1 | 12 |
| -CYCC | 0.39925 | 2 | 2 | 8  |
| -CYCE | 0.39925 | 1 | 1 | 9  |
| -CYCH | 0.39925 | 1 | 1 | 10 |
| -CYCW | 0.39925 | 1 | 1 | 7  |
| -CYCY | 0.39925 | 1 | 1 | 2  |
| -CYDH | 0.39925 | 3 | 3 | 24 |
| -CYDK | 0.39925 | 1 | 1 | 15 |
| -CYDP | 0.39925 | 3 | 3 | 13 |
| -CYEY | 0.39925 | 1 | 1 | 4  |
| -CYFA | 0.39925 | 1 | 1 | 5  |
| -CYFC | 0.39925 | 1 | 1 | 11 |
| -CYFF | 0.39925 | 1 | 1 | 6  |
| -CYFG | 0.39925 | 1 | 1 | 5  |
| -CYFI | 0.39925 | 1 | 1 | 2  |
| -CYFK | 0.39925 | 1 | 1 | 14 |
| -CYFM | 0.39925 | 1 | 1 | 6  |
| -CYFP | 0.39925 | 1 | 1 | 10 |
| -CYFQ | 0.39925 | 2 | 2 | 10 |
| -CYFV | 0.39925 | 1 | 1 | 15 |
| -CYFW | 0.39925 | 1 | 1 | 5  |
| -CYFY | 0.39925 | 1 | 1 | 7  |
| -CYHC | 0.39925 | 1 | 1 | 10 |
| -CYHD | 0.39925 | 2 | 2 | 6  |
| -CYHR | 0.39925 | 1 | 1 | 26 |
| -CYHW | 0.39925 | 1 | 1 | 13 |
| -CYHY | 0.39925 | 1 | 1 | 5  |
| -CYID | 0.39925 | 1 | 1 | 10 |
| -CYIN | 0.39925 | 1 | 1 | 22 |
| -CYIR | 0.39925 | 2 | 2 | 29 |

|       |         |    |    |    |
|-------|---------|----|----|----|
| -CYKH | 0.39925 | 1  | 1  | 8  |
| -CYKK | 0.39925 | 1  | 1  | 13 |
| -CYKW | 0.39925 | 1  | 1  | 2  |
| -CYLF | 0.39925 | 1  | 1  | 10 |
| -CYMC | 0.39925 | 1  | 1  | 6  |
| -CYMF | 0.39925 | 1  | 1  | 13 |
| -CYMG | 0.39925 | 1  | 1  | 9  |
| -CYMH | 0.39925 | 1  | 1  | 23 |
| -CYMI | 0.39925 | 2  | 2  | 9  |
| -CYMM | 0.39925 | 1  | 1  | 7  |
| -CYMW | 0.39925 | 1  | 1  | 8  |
| -CYNC | 0.39925 | 2  | 2  | 5  |
| -CYNE | 0.39925 | 1  | 1  | 4  |
| -CYNM | 0.39925 | 2  | 2  | 16 |
| -CYNP | 0.39925 | 1  | 1  | 6  |
| -CYNY | 0.39925 | 1  | 1  | 13 |
| -CYQC | 0.39925 | 1  | 1  | 7  |
| -CYQD | 0.39925 | 1  | 1  | 7  |
| -CYQE | 0.39925 | 2  | 2  | 9  |
| -CYQH | 0.39925 | 1  | 1  | 12 |
| -CYQQ | 0.39925 | 1  | 1  | 8  |
| -CYQY | 0.39925 | 1  | 1  | 4  |
| -CYRF | 0.39925 | 1  | 1  | 12 |
| -CYRI | 0.39925 | 1  | 1  | 13 |
| -CYSK | 0.39925 | 1  | 1  | 18 |
| -CYTF | 0.39925 | 1  | 1  | 13 |
| -CYVG | 0.39925 | 2  | 2  | 16 |
| -CYVI | 0.39925 | 2  | 2  | 13 |
| -CYVN | 0.39925 | 1  | 1  | 13 |
| -CYVQ | 0.39925 | 2  | 2  | 11 |
| -CYWC | 0.39925 | 1  | 1  | 6  |
| -CYWD | 0.39925 | 1  | 1  | 2  |
| -CYWF | 0.39925 | 1  | 1  | 5  |
| -CYWI | 0.39925 | 1  | 1  | 9  |
| -CYWK | 0.39925 | 1  | 1  | 7  |
| -CYWL | 0.39925 | 1  | 1  | 20 |
| -CYWN | 0.39925 | 1  | 1  | 6  |
| -CYWW | 0.39925 | 1  | 1  | 4  |
| -CYWY | 0.39925 | 1  | 1  | 1  |
| -CYYC | 0.39925 | 1  | 1  | 12 |
| -CYYF | 0.39925 | 1  | 1  | 1  |
| -CYYI | 0.39925 | 1  | 1  | 16 |
| -CYYM | 0.39925 | 2  | 2  | 13 |
| -CYYN | 0.39925 | 1  | 1  | 11 |
| -CYYQ | 0.39925 | 1  | 1  | 11 |
| -CYYR | 0.39925 | 3  | 3  | 21 |
| -CYYY | 0.39925 | 1  | 1  | 3  |
| -CEDA | 0.39925 | 5  | 5  | 13 |
| -CIES | 0.39925 | 5  | 5  | 10 |
| -CIPM | 0.39925 | 5  | 5  | 17 |
| -CNEM | 0.39925 | 5  | 5  | 14 |
| -CQDQ | 0.39925 | 5  | 5  | 16 |
| -CRHC | 0.39925 | 5  | 5  | 15 |
| -CTPA | 0.39925 | 5  | 5  | 23 |
| -CTVY | 0.39925 | 5  | 5  | 29 |
| -CWEA | 0.39925 | 5  | 5  | 4  |
| -CTLT | 0.4146  | 54 | 52 | 83 |

|       |         |    |    |    |
|-------|---------|----|----|----|
| -CAVL | 0.41826 | 22 | 21 | 59 |
| -CVTV | 0.42026 | 40 | 38 | 53 |
| -CFLS | 0.43076 | 41 | 38 | 44 |
| -CSVF | 0.43917 | 22 | 20 | 37 |
| -CFVA | 0.44361 | 10 | 9  | 16 |
| -CLAM | 0.44361 | 10 | 9  | 27 |
| -CSCS | 0.44361 | 10 | 9  | 45 |
| -CVRR | 0.45628 | 16 | 14 | 83 |
| -CSSQ | 0.46067 | 15 | 13 | 57 |
| -CDPD | 0.46579 | 7  | 6  | 18 |
| -CWPQ | 0.46579 | 7  | 6  | 16 |
| -CGIT | 0.47184 | 13 | 11 | 29 |
| -CVTN | 0.47909 | 6  | 5  | 32 |
| -CGSL | 0.48604 | 28 | 23 | 84 |
| -CEAN | 0.49906 | 5  | 4  | 15 |
| -CFMC | 0.49906 | 5  | 4  | 11 |
| -CGKS | 0.49906 | 10 | 8  | 25 |
| -CGMY | 0.49906 | 5  | 4  | 13 |
| -CGYN | 0.49906 | 5  | 4  | 19 |
| -CIHA | 0.49906 | 5  | 4  | 19 |
| -CIMR | 0.49906 | 10 | 8  | 19 |
| -CQLA | 0.49906 | 5  | 4  | 23 |
| -CRCP | 0.49906 | 5  | 4  | 19 |
| -CSCF | 0.49906 | 5  | 4  | 11 |
| -CSSC | 0.49906 | 20 | 16 | 49 |
| -CVCI | 0.49906 | 5  | 4  | 21 |
| -CAML | 0.50813 | 14 | 11 | 31 |
| -CGVG | 0.50813 | 14 | 11 | 23 |
| -CVVE | 0.50813 | 28 | 22 | 31 |
| -CLAQ | 0.51015 | 23 | 18 | 29 |
| -CEMI | 0.51332 | 9  | 7  | 9  |
| -CRFS | 0.51332 | 9  | 7  | 43 |
| -CMVV | 0.51902 | 13 | 10 | 31 |
| -CARA | 0.53233 | 4  | 3  | 25 |
| -CCAF | 0.53233 | 8  | 6  | 15 |
| -CCAQ | 0.53233 | 4  | 3  | 8  |
| -CCDR | 0.53233 | 4  | 3  | 13 |
| -CDDQ | 0.53233 | 4  | 3  | 11 |
| -CDQY | 0.53233 | 4  | 3  | 7  |
| -CDVQ | 0.53233 | 4  | 3  | 11 |
| -CGKW | 0.53233 | 4  | 3  | 19 |
| -CGLF | 0.53233 | 4  | 3  | 29 |
| -CHDY | 0.53233 | 4  | 3  | 9  |
| -CHER | 0.53233 | 4  | 3  | 25 |
| -CHVV | 0.53233 | 4  | 3  | 30 |
| -CIDH | 0.53233 | 8  | 6  | 10 |
| -CKDA | 0.53233 | 4  | 3  | 14 |
| -CKMP | 0.53233 | 4  | 3  | 5  |
| -CKYS | 0.53233 | 4  | 3  | 16 |
| -CLTF | 0.53233 | 4  | 3  | 28 |
| -CMHE | 0.53233 | 4  | 3  | 9  |
| -CMQS | 0.53233 | 4  | 3  | 27 |
| -CPAE | 0.53233 | 4  | 3  | 24 |
| -CQMC | 0.53233 | 4  | 3  | 14 |
| -CRHL | 0.53233 | 8  | 6  | 41 |
| -CSCH | 0.53233 | 4  | 3  | 20 |
| -CTCH | 0.53233 | 4  | 3  | 12 |

|       |         |    |    |    |
|-------|---------|----|----|----|
| -CTSF | 0.53233 | 4  | 3  | 41 |
| -CHRA | 0.54443 | 15 | 11 | 41 |
| -CVML | 0.54564 | 41 | 30 | 43 |
| -CVDA | 0.54896 | 11 | 8  | 13 |
| -CAIG | 0.55894 | 28 | 20 | 20 |
| -CCYV | 0.55894 | 7  | 5  | 19 |
| -CHRH | 0.55894 | 7  | 5  | 32 |
| -CIRA | 0.55894 | 7  | 5  | 23 |
| -CMWR | 0.55894 | 7  | 5  | 23 |
| -CYWV | 0.55894 | 7  | 5  | 14 |
| -CSKN | 0.5656  | 17 | 12 | 20 |
| -CMMS | 0.57669 | 13 | 9  | 37 |
| -CCVL | 0.58351 | 19 | 13 | 38 |
| -CSQI | 0.59887 | 9  | 6  | 8  |
| -CACI | 0.59887 | 3  | 2  | 9  |
| -CAEH | 0.59887 | 3  | 2  | 7  |
| -CCDH | 0.59887 | 3  | 2  | 5  |
| -CCHD | 0.59887 | 3  | 2  | 8  |
| -CCML | 0.59887 | 3  | 2  | 22 |
| -CCQQ | 0.59887 | 3  | 2  | 3  |
| -CCRQ | 0.59887 | 6  | 4  | 18 |
| -CCYM | 0.59887 | 3  | 2  | 7  |
| -CDHH | 0.59887 | 6  | 4  | 10 |
| -CDPA | 0.59887 | 6  | 4  | 18 |
| -CEDD | 0.59887 | 3  | 2  | 3  |
| -CEIH | 0.59887 | 3  | 2  | 9  |
| -CFQL | 0.59887 | 3  | 2  | 13 |
| -CFRE | 0.59887 | 3  | 2  | 17 |
| -CFVQ | 0.59887 | 3  | 2  | 18 |
| -CGCC | 0.59887 | 3  | 2  | 10 |
| -CGHL | 0.59887 | 3  | 2  | 39 |
| -CGWG | 0.59887 | 3  | 2  | 20 |
| -CHCQ | 0.59887 | 3  | 2  | 13 |
| -CHDH | 0.59887 | 3  | 2  | 6  |
| -CHGH | 0.59887 | 3  | 2  | 9  |
| -CHVW | 0.59887 | 3  | 2  | 20 |
| -CIDG | 0.59887 | 3  | 2  | 9  |
| -CIKP | 0.59887 | 3  | 2  | 16 |
| -CIVD | 0.59887 | 12 | 8  | 21 |
| -CIWL | 0.59887 | 3  | 2  | 12 |
| -CKCR | 0.59887 | 3  | 2  | 11 |
| -CKID | 0.59887 | 3  | 2  | 6  |
| -CKYT | 0.59887 | 3  | 2  | 13 |
| -CLFC | 0.59887 | 3  | 2  | 11 |
| -CMLN | 0.59887 | 3  | 2  | 20 |
| -CMYS | 0.59887 | 3  | 2  | 27 |
| -CNCE | 0.59887 | 6  | 4  | 23 |
| -CPVF | 0.59887 | 3  | 2  | 19 |
| -CPYM | 0.59887 | 3  | 2  | 19 |
| -CQQR | 0.59887 | 6  | 4  | 27 |
| -CQVQ | 0.59887 | 3  | 2  | 14 |
| -CRIH | 0.59887 | 3  | 2  | 16 |
| -CRYQ | 0.59887 | 6  | 4  | 19 |
| -CSHA | 0.59887 | 6  | 4  | 24 |
| -CSQD | 0.59887 | 3  | 2  | 10 |
| -CTTH | 0.59887 | 3  | 2  | 22 |
| -CTWG | 0.59887 | 3  | 2  | 18 |

|       |         |    |    |    |
|-------|---------|----|----|----|
| -CVAH | 0.59887 | 3  | 2  | 11 |
| -CVQR | 0.59887 | 6  | 4  | 22 |
| -CWCL | 0.59887 | 3  | 2  | 24 |
| -CWCV | 0.59887 | 3  | 2  | 4  |
| -CWQQ | 0.59887 | 3  | 2  | 2  |
| -CWVT | 0.59887 | 3  | 2  | 16 |
| -CYCG | 0.59887 | 3  | 2  | 5  |
| -CYLI | 0.59887 | 6  | 4  | 40 |
| -CYND | 0.59887 | 3  | 2  | 10 |
| -CNHA | 0.62739 | 11 | 7  | 17 |
| -CSCA | 0.62739 | 11 | 7  | 36 |
| -CTID | 0.62739 | 11 | 7  | 10 |
| -CRIL | 0.6341  | 27 | 17 | 51 |
| -CSVV | 0.6341  | 54 | 34 | 65 |
| -CADP | 0.63879 | 8  | 5  | 17 |
| -CNHL | 0.63879 | 8  | 5  | 21 |
| -CWSC | 0.63879 | 8  | 5  | 15 |
| -CYRA | 0.63879 | 8  | 5  | 32 |
| -CAHI | 0.64877 | 13 | 8  | 35 |
| -CIAS | 0.6559  | 23 | 14 | 45 |
| -CCRM | 0.66541 | 5  | 3  | 38 |
| -CDLI | 0.66541 | 5  | 3  | 25 |
| -CDRH | 0.66541 | 5  | 3  | 9  |
| -CGIG | 0.66541 | 5  | 3  | 27 |
| -CGVY | 0.66541 | 5  | 3  | 10 |
| -CHLS | 0.66541 | 10 | 6  | 49 |
| -CHVR | 0.66541 | 10 | 6  | 43 |
| -CIMP | 0.66541 | 5  | 3  | 12 |
| -CKVA | 0.66541 | 10 | 6  | 17 |
| -CLLY | 0.66541 | 5  | 3  | 5  |
| -CNCF | 0.66541 | 5  | 3  | 13 |
| -CPGE | 0.66541 | 5  | 3  | 20 |
| -CQMM | 0.66541 | 5  | 3  | 7  |
| -CTLY | 0.66541 | 5  | 3  | 40 |
| -CTNF | 0.66541 | 5  | 3  | 10 |
| -CWSP | 0.66541 | 5  | 3  | 28 |
| -CWTG | 0.66541 | 5  | 3  | 15 |
| -CYHH | 0.66541 | 5  | 3  | 14 |
| -CYLP | 0.66541 | 15 | 9  | 38 |
| -CLCA | 0.68442 | 60 | 35 | 25 |
| -CCMA | 0.69868 | 14 | 8  | 14 |
| -CCTN | 0.69868 | 7  | 4  | 16 |
| -CDMM | 0.69868 | 7  | 4  | 3  |
| -CDTC | 0.69868 | 7  | 4  | 27 |
| -CDTH | 0.69868 | 7  | 4  | 17 |
| -CHGK | 0.69868 | 7  | 4  | 11 |
| -CPYP | 0.69868 | 7  | 4  | 14 |
| -CSPF | 0.69868 | 7  | 4  | 32 |
| -CNVT | 0.70455 | 30 | 17 | 30 |
| -CITV | 0.70977 | 16 | 9  | 36 |
| -CAVI | 0.71864 | 9  | 5  | 20 |
| -CDII | 0.71864 | 9  | 5  | 8  |
| -CGAK | 0.71864 | 9  | 5  | 17 |
| -CMYV | 0.71864 | 9  | 5  | 25 |
| -CTFS | 0.74146 | 13 | 7  | 36 |
| -CLMV | 0.75413 | 17 | 9  | 41 |
| -CFIC | 0.7622  | 21 | 11 | 7  |

|       |         |    |   |    |
|-------|---------|----|---|----|
| -CATM | 0.79849 | 4  | 2 | 24 |
| -CAWF | 0.79849 | 2  | 1 | 6  |
| -CCAI | 0.79849 | 2  | 1 | 3  |
| -CCCC | 0.79849 | 2  | 1 | 6  |
| -CCCR | 0.79849 | 4  | 2 | 15 |
| -CCDQ | 0.79849 | 4  | 2 | 8  |
| -CCDY | 0.79849 | 2  | 1 | 13 |
| -CCHC | 0.79849 | 2  | 1 | 5  |
| -CCHI | 0.79849 | 2  | 1 | 7  |
| -CCLH | 0.79849 | 6  | 3 | 19 |
| -CCMP | 0.79849 | 2  | 1 | 14 |
| -CCNP | 0.79849 | 2  | 1 | 27 |
| -CCPC | 0.79849 | 2  | 1 | 9  |
| -CCQI | 0.79849 | 2  | 1 | 13 |
| -CCRD | 0.79849 | 4  | 2 | 24 |
| -CCVK | 0.79849 | 2  | 1 | 10 |
| -CCVQ | 0.79849 | 14 | 7 | 7  |
| -CCWH | 0.79849 | 2  | 1 | 11 |
| -CCYF | 0.79849 | 2  | 1 | 11 |
| -CCYY | 0.79849 | 2  | 1 | 11 |
| -CDCF | 0.79849 | 2  | 1 | 9  |
| -CDCM | 0.79849 | 2  | 1 | 5  |
| -CDCV | 0.79849 | 2  | 1 | 15 |
| -CDFH | 0.79849 | 2  | 1 | 7  |
| -CDNP | 0.79849 | 2  | 1 | 10 |
| -CDPQ | 0.79849 | 2  | 1 | 3  |
| -CDQW | 0.79849 | 4  | 2 | 7  |
| -CDWR | 0.79849 | 2  | 1 | 15 |
| -CDWW | 0.79849 | 2  | 1 | 7  |
| -CEIP | 0.79849 | 6  | 3 | 7  |
| -CEMD | 0.79849 | 2  | 1 | 6  |
| -CEWQ | 0.79849 | 2  | 1 | 3  |
| -CEYH | 0.79849 | 2  | 1 | 6  |
| -CFCI | 0.79849 | 2  | 1 | 6  |
| -CFCP | 0.79849 | 2  | 1 | 8  |
| -CFCR | 0.79849 | 2  | 1 | 8  |
| -CFFM | 0.79849 | 2  | 1 | 12 |
| -CFHW | 0.79849 | 2  | 1 | 8  |
| -CFMY | 0.79849 | 2  | 1 | 5  |
| -CFPY | 0.79849 | 2  | 1 | 8  |
| -CFQP | 0.79849 | 2  | 1 | 8  |
| -CFRW | 0.79849 | 2  | 1 | 13 |
| -CFTM | 0.79849 | 6  | 3 | 13 |
| -CFYM | 0.79849 | 2  | 1 | 5  |
| -CFYQ | 0.79849 | 2  | 1 | 5  |
| -CFYY | 0.79849 | 2  | 1 | 10 |
| -CGHK | 0.79849 | 2  | 1 | 19 |
| -CGHP | 0.79849 | 2  | 1 | 11 |
| -CGIH | 0.79849 | 2  | 1 | 7  |
| -CGII | 0.79849 | 2  | 1 | 8  |
| -CGIY | 0.79849 | 2  | 1 | 11 |
| -CGMW | 0.79849 | 2  | 1 | 22 |
| -CGNP | 0.79849 | 2  | 1 | 20 |
| -CGVW | 0.79849 | 2  | 1 | 19 |
| -CHAA | 0.79849 | 2  | 1 | 9  |
| -CHAD | 0.79849 | 2  | 1 | 18 |
| -CHAI | 0.79849 | 2  | 1 | 13 |

|       |         |   |   |    |
|-------|---------|---|---|----|
| -CHAQ | 0.79849 | 2 | 1 | 9  |
| -CHFH | 0.79849 | 2 | 1 | 4  |
| -CHFI | 0.79849 | 2 | 1 | 4  |
| -CHFK | 0.79849 | 2 | 1 | 3  |
| -CHHQ | 0.79849 | 4 | 2 | 8  |
| -CHLY | 0.79849 | 2 | 1 | 16 |
| -CHKH | 0.79849 | 2 | 1 | 9  |
| -CHMC | 0.79849 | 2 | 1 | 9  |
| -CHNP | 0.79849 | 2 | 1 | 7  |
| -CHVY | 0.79849 | 2 | 1 | 10 |
| -CHWI | 0.79849 | 2 | 1 | 6  |
| -CHWM | 0.79849 | 2 | 1 | 17 |
| -CHWR | 0.79849 | 2 | 1 | 18 |
| -CIAC | 0.79849 | 2 | 1 | 5  |
| -CIDC | 0.79849 | 2 | 1 | 3  |
| -CIHC | 0.79849 | 2 | 1 | 8  |
| -CIIW | 0.79849 | 4 | 2 | 18 |
| -CIMD | 0.79849 | 2 | 1 | 3  |
| -CISH | 0.79849 | 2 | 1 | 17 |
| -CIVY | 0.79849 | 6 | 3 | 13 |
| -CKCL | 0.79849 | 2 | 1 | 13 |
| -CKFM | 0.79849 | 2 | 1 | 10 |
| -CKHA | 0.79849 | 2 | 1 | 8  |
| -CKIH | 0.79849 | 2 | 1 | 7  |
| -CKPD | 0.79849 | 2 | 1 | 6  |
| -CKWH | 0.79849 | 2 | 1 | 12 |
| -CLCT | 0.79849 | 4 | 2 | 32 |
| -CLQH | 0.79849 | 2 | 1 | 14 |
| -CLWF | 0.79849 | 2 | 1 | 10 |
| -CLYC | 0.79849 | 2 | 1 | 15 |
| -CMCH | 0.79849 | 2 | 1 | 8  |
| -CMIK | 0.79849 | 2 | 1 | 8  |
| -CMNE | 0.79849 | 2 | 1 | 7  |
| -CMNW | 0.79849 | 2 | 1 | 10 |
| -CMYI | 0.79849 | 2 | 1 | 11 |
| -CNFC | 0.79849 | 2 | 1 | 24 |
| -CNQD | 0.79849 | 2 | 1 | 5  |
| -CPCH | 0.79849 | 2 | 1 | 18 |
| -CPFV | 0.79849 | 2 | 1 | 11 |
| -CPHK | 0.79849 | 2 | 1 | 11 |
| -CPMI | 0.79849 | 2 | 1 | 17 |
| -CPVQ | 0.79849 | 2 | 1 | 18 |
| -CPWQ | 0.79849 | 4 | 2 | 3  |
| -CPYQ | 0.79849 | 2 | 1 | 12 |
| -CQHS | 0.79849 | 2 | 1 | 10 |
| -CQLE | 0.79849 | 2 | 1 | 9  |
| -CQLG | 0.79849 | 6 | 3 | 20 |
| -CQMQ | 0.79849 | 2 | 1 | 18 |
| -CQYG | 0.79849 | 4 | 2 | 7  |
| -CQYI | 0.79849 | 2 | 1 | 4  |
| -CQYV | 0.79849 | 4 | 2 | 27 |
| -CRCC | 0.79849 | 2 | 1 | 10 |
| -CRCV | 0.79849 | 6 | 3 | 39 |
| -CRFF | 0.79849 | 2 | 1 | 9  |
| -CRFK | 0.79849 | 2 | 1 | 18 |
| -CRFW | 0.79849 | 2 | 1 | 23 |
| -CRHE | 0.79849 | 2 | 1 | 14 |

|       |         |    |    |    |
|-------|---------|----|----|----|
| -CRMQ | 0.79849 | 4  | 2  | 15 |
| -CRTQ | 0.79849 | 2  | 1  | 51 |
| -CRWW | 0.79849 | 2  | 1  | 17 |
| -CRYC | 0.79849 | 4  | 2  | 13 |
| -CSCC | 0.79849 | 4  | 2  | 19 |
| -CSWH | 0.79849 | 2  | 1  | 12 |
| -CSYA | 0.79849 | 8  | 4  | 28 |
| -CTCP | 0.79849 | 2  | 1  | 18 |
| -CTHQ | 0.79849 | 2  | 1  | 18 |
| -CTPF | 0.79849 | 6  | 3  | 16 |
| -CTWP | 0.79849 | 4  | 2  | 18 |
| -CTWQ | 0.79849 | 2  | 1  | 14 |
| -CTYQ | 0.79849 | 2  | 1  | 4  |
| -CVFA | 0.79849 | 2  | 1  | 23 |
| -CVFG | 0.79849 | 2  | 1  | 10 |
| -CVFI | 0.79849 | 2  | 1  | 15 |
| -CVHA | 0.79849 | 4  | 2  | 16 |
| -CVMD | 0.79849 | 2  | 1  | 11 |
| -CVPP | 0.79849 | 2  | 1  | 20 |
| -CVYM | 0.79849 | 8  | 4  | 19 |
| -CWCH | 0.79849 | 2  | 1  | 1  |
| -CWCP | 0.79849 | 4  | 2  | 17 |
| -CWFH | 0.79849 | 2  | 1  | 7  |
| -CWFM | 0.79849 | 2  | 1  | 11 |
| -CWHI | 0.79849 | 2  | 1  | 12 |
| -CWHQ | 0.79849 | 2  | 1  | 2  |
| -CWHV | 0.79849 | 2  | 1  | 7  |
| -CWIF | 0.79849 | 6  | 3  | 8  |
| -CWIQ | 0.79849 | 2  | 1  | 1  |
| -CWMN | 0.79849 | 2  | 1  | 5  |
| -CWMP | 0.79849 | 2  | 1  | 18 |
| -CWPN | 0.79849 | 2  | 1  | 16 |
| -CWVQ | 0.79849 | 4  | 2  | 8  |
| -CYHA | 0.79849 | 6  | 3  | 11 |
| -CYHV | 0.79849 | 2  | 1  | 19 |
| -CYIQ | 0.79849 | 4  | 2  | 14 |
| -CYIY | 0.79849 | 2  | 1  | 13 |
| -CYKY | 0.79849 | 2  | 1  | 6  |
| -CYMA | 0.79849 | 2  | 1  | 19 |
| -CYMQ | 0.79849 | 2  | 1  | 9  |
| -CYNH | 0.79849 | 2  | 1  | 5  |
| -CYPM | 0.79849 | 2  | 1  | 14 |
| -CYVF | 0.79849 | 2  | 1  | 16 |
| -CYWP | 0.79849 | 2  | 1  | 12 |
| -CYYV | 0.79849 | 2  | 1  | 16 |
| -CCYL | 0.79849 | 10 | 5  | 37 |
| -CQGG | 0.79849 | 10 | 5  | 11 |
| -CSVN | 0.81845 | 41 | 20 | 40 |
| -CQLS | 0.8195  | 39 | 19 | 46 |
| -CKVS | 0.82511 | 31 | 15 | 19 |
| -CILG | 0.83479 | 23 | 11 | 22 |
| -CLIK | 0.8484  | 17 | 8  | 23 |
| -CHVT | 0.86503 | 13 | 6  | 19 |
| -CQVV | 0.88721 | 20 | 9  | 9  |
| -CDHQ | 0.93157 | 7  | 3  | 15 |
| -CEVA | 0.93157 | 28 | 12 | 27 |
| -CIML | 0.93157 | 7  | 3  | 12 |



|       |         |     |    |    |
|-------|---------|-----|----|----|
| -CTKF | 0.93157 | 7   | 3  | 16 |
| -CVCN | 0.93157 | 7   | 3  | 21 |
| -CYHL | 0.93157 | 7   | 3  | 38 |
| -CQCF | 0.94821 | 19  | 8  | 11 |
| -CTCS | 0.98276 | 32  | 13 | 39 |
| -CFTQ | 0.99811 | 5   | 2  | 12 |
| -CGMM | 0.99811 | 10  | 4  | 9  |
| -CGRY | 0.99811 | 5   | 2  | 26 |
| -CHHL | 0.99811 | 10  | 4  | 17 |
| -CIMH | 0.99811 | 5   | 2  | 10 |
| -CKFQ | 0.99811 | 5   | 2  | 18 |
| -CLVH | 0.99811 | 5   | 2  | 20 |
| -CPNQ | 0.99811 | 5   | 2  | 15 |
| -CREC | 0.99811 | 5   | 2  | 12 |
| -CRQM | 0.99811 | 5   | 2  | 7  |
| -CWMM | 0.99811 | 5   | 2  | 7  |
| -CYHP | 0.99811 | 5   | 2  | 15 |
| -CYII | 0.99811 | 5   | 2  | 10 |
| -CNVL | 1.0188  | 74  | 29 | 51 |
| -CVWM | 1.0266  | 18  | 7  | 15 |
| -CVVY | 1.0314  | 62  | 24 | 26 |
| -CKLC | 1.038   | 13  | 5  | 13 |
| -CTTF | 1.038   | 52  | 20 | 36 |
| -CDHA | 1.0647  | 8   | 3  | 16 |
| -CGES | 1.0647  | 8   | 3  | 23 |
| -CIMN | 1.0647  | 8   | 3  | 10 |
| -CPCP | 1.0647  | 8   | 3  | 17 |
| -CVHQ | 1.0647  | 8   | 3  | 13 |
| -CSLA | 1.0647  | 112 | 42 | 65 |
| -CINQ | 1.1312  | 17  | 6  | 18 |
| -CISM | 1.1363  | 37  | 13 | 23 |
| -CRLA | 1.1603  | 93  | 32 | 69 |
| -CKIS | 1.1767  | 56  | 19 | 14 |
| -CAMA | 1.1977  | 18  | 6  | 14 |
| -CKLH | 1.1977  | 9   | 3  | 15 |
| -CMVT | 1.1977  | 9   | 3  | 19 |
| -CPCQ | 1.1977  | 9   | 3  | 10 |
| -CPIT | 1.1977  | 9   | 3  | 23 |
| -CTLV | 1.1977  | 99  | 33 | 78 |
| -CTVI | 1.1977  | 39  | 13 | 28 |
| -CVCY | 1.1977  | 9   | 3  | 7  |
| -CAHW | 1.1977  | 3   | 1  | 15 |
| -CAMH | 1.1977  | 3   | 1  | 13 |
| -CAWN | 1.1977  | 3   | 1  | 8  |
| -CCIM | 1.1977  | 3   | 1  | 9  |
| -CCMH | 1.1977  | 3   | 1  | 10 |
| -CCPQ | 1.1977  | 3   | 1  | 5  |
| -CDCQ | 1.1977  | 3   | 1  | 4  |
| -CDIN | 1.1977  | 3   | 1  | 6  |
| -CDVF | 1.1977  | 3   | 1  | 11 |
| -CDVS | 1.1977  | 21  | 7  | 51 |
| -CEEW | 1.1977  | 6   | 2  | 10 |
| -CEFM | 1.1977  | 3   | 1  | 10 |
| -CFGW | 1.1977  | 3   | 1  | 11 |
| -CGVC | 1.1977  | 3   | 1  | 12 |
| -CHHV | 1.1977  | 3   | 1  | 14 |
| -CHPQ | 1.1977  | 3   | 1  | 18 |

|       |        |     |    |    |
|-------|--------|-----|----|----|
| -CIDQ | 1.1977 | 3   | 1  | 14 |
| -CIHH | 1.1977 | 3   | 1  | 16 |
| -CLWI | 1.1977 | 3   | 1  | 11 |
| -CMFA | 1.1977 | 3   | 1  | 6  |
| -CMGY | 1.1977 | 3   | 1  | 3  |
| -CMID | 1.1977 | 3   | 1  | 13 |
| -CNMF | 1.1977 | 3   | 1  | 9  |
| -CNMQ | 1.1977 | 3   | 1  | 10 |
| -CQRH | 1.1977 | 3   | 1  | 14 |
| -CRCF | 1.1977 | 3   | 1  | 7  |
| -CRFQ | 1.1977 | 3   | 1  | 7  |
| -CSQQ | 1.1977 | 3   | 1  | 13 |
| -CVFT | 1.1977 | 3   | 1  | 20 |
| -CVMH | 1.1977 | 3   | 1  | 11 |
| -CVMI | 1.1977 | 15  | 5  | 15 |
| -CVWP | 1.1977 | 3   | 1  | 13 |
| -CWRH | 1.1977 | 3   | 1  | 12 |
| -CYQI | 1.1977 | 3   | 1  | 5  |
| -CKIA | 1.2548 | 44  | 14 | 10 |
| -CTAM | 1.2643 | 19  | 6  | 14 |
| -CYLA | 1.3206 | 43  | 13 | 57 |
| -CLQQ | 1.3574 | 17  | 5  | 11 |
| -CCRA | 1.3974 | 7   | 2  | 34 |
| -CHCM | 1.3974 | 7   | 2  | 2  |
| -CPCA | 1.3974 | 7   | 2  | 12 |
| -CTGH | 1.3974 | 7   | 2  | 26 |
| -CVCA | 1.3974 | 28  | 8  | 27 |
| -CYPQ | 1.3974 | 7   | 2  | 17 |
| -CQVA | 1.4259 | 50  | 14 | 10 |
| -CTAQ | 1.4259 | 25  | 7  | 25 |
| -CDAN | 1.4289 | 68  | 19 | 32 |
| -CVSF | 1.4449 | 76  | 21 | 22 |
| -CIIE | 1.4639 | 11  | 3  | 5  |
| -CKIT | 1.4639 | 11  | 3  | 13 |
| -CTCC | 1.4639 | 11  | 3  | 14 |
| -CWAM | 1.4639 | 11  | 3  | 13 |
| -CLMF | 1.4829 | 78  | 21 | 38 |
| -CICL | 1.4972 | 15  | 4  | 16 |
| -CITH | 1.4972 | 15  | 4  | 11 |
| -CLLN | 1.4972 | 90  | 24 | 41 |
| -CNRT | 1.4972 | 15  | 4  | 39 |
| -CVSM | 1.5048 | 98  | 26 | 46 |
| -CNLS | 1.5083 | 136 | 36 | 81 |
| -CSMF | 1.5171 | 57  | 15 | 35 |
| -CIDA | 1.5171 | 19  | 5  | 24 |
| -CQTK | 1.5471 | 31  | 8  | 29 |
| -CKLM | 1.5694 | 114 | 29 | 28 |
| -CDFQ | 1.597  | 4   | 1  | 20 |
| -CECF | 1.597  | 8   | 2  | 9  |
| -CFIQ | 1.597  | 4   | 1  | 2  |
| -CHVQ | 1.597  | 8   | 2  | 15 |
| -CILH | 1.597  | 24  | 6  | 21 |
| -CPIA | 1.597  | 28  | 7  | 17 |
| -CQQG | 1.597  | 4   | 1  | 6  |
| -CRDH | 1.597  | 4   | 1  | 7  |
| -CRMF | 1.597  | 8   | 2  | 13 |
| -CTLF | 1.597  | 24  | 6  | 16 |

|       |        |     |    |    |
|-------|--------|-----|----|----|
| -CTMH | 1.597  | 4   | 1  | 14 |
| -CVPF | 1.597  | 24  | 6  | 10 |
| -CVWA | 1.597  | 4   | 1  | 22 |
| -CYLQ | 1.597  | 8   | 2  | 28 |
| -CYML | 1.597  | 4   | 1  | 26 |
| -CVCT | 1.6502 | 62  | 15 | 10 |
| -CCVF | 1.6635 | 50  | 12 | 15 |
| -CVQC | 1.6768 | 21  | 5  | 13 |
| -CTMV | 1.6838 | 97  | 23 | 38 |
| -CGVK | 1.6968 | 68  | 16 | 21 |
| -CFVS | 1.7153 | 116 | 27 | 15 |
| -CEWM | 1.7301 | 13  | 3  | 14 |
| -CGIV | 1.7301 | 130 | 30 | 37 |
| -CCIG | 1.7744 | 40  | 9  | 17 |
| -CLTC | 1.7754 | 209 | 47 | 35 |
| -CDLQ | 1.7966 | 9   | 2  | 12 |
| -CLHQ | 1.8631 | 14  | 3  | 14 |
| -CWLC | 1.8631 | 28  | 6  | 12 |
| -CDIL | 1.9004 | 119 | 25 | 28 |
| -CAVT | 1.9164 | 48  | 10 | 18 |
| -CTLN | 1.9297 | 145 | 30 | 58 |
| -CKMM | 1.9392 | 34  | 7  | 5  |
| -CCQM | 1.9519 | 44  | 9  | 17 |
| -CDIV | 1.9838 | 159 | 32 | 13 |
| -CGIF | 1.9962 | 15  | 3  | 11 |
| -CVHM | 1.9962 | 60  | 12 | 24 |
| -CDIT | 1.9962 | 5   | 1  | 10 |
| -CEMC | 1.9962 | 5   | 1  | 2  |
| -CEYM | 1.9962 | 5   | 1  | 20 |
| -CFIL | 1.9962 | 5   | 1  | 14 |
| -CICC | 1.9962 | 5   | 1  | 7  |
| -CNCQ | 1.9962 | 10  | 2  | 13 |
| -CTDF | 1.9962 | 5   | 1  | 10 |
| -CVTQ | 1.9962 | 10  | 2  | 23 |
| -CWYQ | 1.9962 | 5   | 1  | 12 |
| -CQLM | 2.0136 | 116 | 23 | 20 |
| -CVVG | 2.0483 | 118 | 23 | 18 |
| -CVLV | 2.0647 | 181 | 35 | 63 |
| -CMLS | 2.0898 | 335 | 64 | 52 |
| -CHLQ | 2.096  | 21  | 4  | 9  |
| -CRCQ | 2.1293 | 16  | 3  | 16 |
| -CCVA | 2.1339 | 155 | 29 | 19 |
| -CAVF | 2.1959 | 33  | 6  | 21 |
| -CTFA | 2.1959 | 33  | 6  | 14 |
| -CPIS | 2.2503 | 62  | 11 | 26 |
| -CFIM | 2.2624 | 17  | 3  | 2  |
| -CAWQ | 2.2846 | 103 | 18 | 18 |
| -CMVM | 2.2957 | 46  | 8  | 18 |
| -CCMS | 2.3384 | 41  | 7  | 17 |
| -CMMC | 2.3456 | 47  | 8  | 6  |
| -CYIL | 2.3755 | 119 | 20 | 31 |
| -CHHG | 2.3955 | 6   | 1  | 10 |
| -CHHH | 2.3955 | 6   | 1  | 10 |
| -CIFM | 2.3955 | 6   | 1  | 12 |
| -CMCF | 2.3955 | 6   | 1  | 9  |
| -CMYK | 2.3955 | 6   | 1  | 5  |
| -CNVF | 2.3955 | 12  | 2  | 9  |

|       |        |     |    |     |
|-------|--------|-----|----|-----|
| -CPTQ | 2.3955 | 6   | 1  | 18  |
| -CQCM | 2.3955 | 6   | 1  | 5   |
| -CRII | 2.3955 | 12  | 2  | 20  |
| -CVFM | 2.3955 | 6   | 1  | 10  |
| -CVIW | 2.3955 | 30  | 5  | 11  |
| -CGLQ | 2.4525 | 43  | 7  | 22  |
| -CPYK | 2.462  | 37  | 6  | 23  |
| -CIAM | 2.4753 | 31  | 5  | 14  |
| -CVQM | 2.5175 | 227 | 36 | 18  |
| -CLIG | 2.5701 | 103 | 16 | 34  |
| -CDVM | 2.6105 | 85  | 13 | 18  |
| -CNVM | 2.6616 | 100 | 15 | 17  |
| -CIMV | 2.706  | 122 | 18 | 12  |
| -CSLS | 2.707  | 617 | 91 | 156 |
| -CRVC | 2.7253 | 157 | 23 | 35  |
| -CTYM | 2.7377 | 48  | 7  | 12  |
| -CMMM | 2.7504 | 62  | 9  | 8   |
| -CILC | 2.7519 | 193 | 28 | 18  |
| -CFIS | 2.7774 | 160 | 23 | 27  |
| -CTWM | 2.7947 | 49  | 7  | 17  |
| -CCMR | 2.7947 | 7   | 1  | 15  |
| -CEQR | 2.7947 | 14  | 2  | 9   |
| -CFIN | 2.7947 | 7   | 1  | 16  |
| -CIAQ | 2.7947 | 35  | 5  | 8   |
| -CTFQ | 2.7947 | 7   | 1  | 17  |
| -CYIF | 2.7947 | 7   | 1  | 8   |
| -CAMF | 2.8137 | 148 | 21 | 26  |
| -CSIY | 2.8746 | 36  | 5  | 12  |
| -CTAF | 2.8834 | 130 | 18 | 15  |
| -CITS | 2.8945 | 116 | 16 | 33  |
| -CMLA | 2.8945 | 58  | 8  | 23  |
| -CNMC | 2.8945 | 29  | 4  | 15  |
| -CTIE | 2.8945 | 58  | 8  | 16  |
| -CVCF | 2.8945 | 116 | 16 | 16  |
| -CVVH | 2.9345 | 147 | 20 | 32  |
| -CIIA | 2.9356 | 125 | 17 | 24  |
| -CLCF | 2.9399 | 81  | 11 | 7   |
| -CVMA | 2.9516 | 207 | 28 | 24  |
| -CVLF | 2.9544 | 185 | 25 | 28  |
| -CTIG | 2.9943 | 15  | 2  | 17  |
| -CWIV | 2.9943 | 15  | 2  | 6   |
| -CIMC | 3.0442 | 61  | 8  | 4   |
| -CVVI | 3.0757 | 208 | 27 | 17  |
| -CCLA | 3.0822 | 193 | 25 | 41  |
| -CIVV | 3.0942 | 93  | 12 | 28  |
| -CEIS | 3.0942 | 124 | 16 | 30  |
| -CFVC | 3.1214 | 172 | 22 | 16  |
| -CCYA | 3.194  | 8   | 1  | 3   |
| -CFIF | 3.194  | 8   | 1  | 4   |
| -CHFM | 3.194  | 32  | 4  | 7   |
| -CHLC | 3.194  | 56  | 7  | 14  |
| -CILV | 3.194  | 112 | 14 | 30  |
| -CNVV | 3.194  | 96  | 12 | 26  |
| -CSIQ | 3.2161 | 145 | 18 | 25  |
| -CIVA | 3.2409 | 138 | 17 | 20  |
| -CLVV | 3.308  | 406 | 49 | 84  |
| -CICV | 3.321  | 183 | 22 | 15  |

|       |        |     |    |     |
|-------|--------|-----|----|-----|
| -CYVA | 3.327  | 25  | 3  | 21  |
| -CIVL | 3.3366 | 234 | 28 | 57  |
| -CAIF | 3.3651 | 59  | 7  | 6   |
| -CVIM | 3.3714 | 152 | 18 | 19  |
| -CRIM | 3.3754 | 93  | 11 | 13  |
| -CVMQ | 3.3754 | 93  | 11 | 17  |
| -CEIV | 3.3936 | 153 | 18 | 14  |
| -CELM | 3.3936 | 34  | 4  | 4   |
| -CMVA | 3.4069 | 128 | 15 | 10  |
| -CNIT | 3.4089 | 111 | 13 | 17  |
| -CVVC | 3.4185 | 137 | 16 | 32  |
| -CLYG | 3.4335 | 43  | 5  | 27  |
| -CDIA | 3.5134 | 132 | 15 | 23  |
| -CWTQ | 3.5134 | 44  | 5  | 10  |
| -CRLS | 3.5172 | 555 | 63 | 107 |
| -CTCF | 3.5267 | 53  | 6  | 8   |
| -CAIC | 3.5267 | 159 | 18 | 15  |
| -CNCM | 3.5362 | 62  | 7  | 9   |
| -CGIS | 3.5533 | 178 | 20 | 21  |
| -CHHA | 3.5932 | 9   | 1  | 11  |
| -CHIN | 3.5932 | 9   | 1  | 9   |
| -CHYH | 3.5932 | 9   | 1  | 18  |
| -CKIM | 3.5932 | 36  | 4  | 9   |
| -CCVV | 3.6671 | 248 | 27 | 33  |
| -CIVI | 3.7263 | 56  | 6  | 6   |
| -CYIS | 3.7529 | 141 | 15 | 19  |
| -CEIF | 3.7529 | 47  | 5  | 8   |
| -CICT | 3.7928 | 57  | 6  | 16  |
| -CVIC | 3.811  | 105 | 11 | 11  |
| -CTCM | 3.8594 | 29  | 3  | 11  |
| -CICM | 3.9562 | 109 | 11 | 7   |
| -CIVQ | 3.9592 | 119 | 12 | 26  |
| -CLMA | 3.9605 | 248 | 25 | 15  |
| -CHIT | 3.9714 | 189 | 19 | 25  |
| -CKVC | 3.9925 | 30  | 3  | 4   |
| -CHMH | 3.9925 | 10  | 1  | 11  |
| -CPCF | 3.9925 | 20  | 2  | 8   |
| -CQIY | 3.9925 | 20  | 2  | 4   |
| -CTMF | 3.9925 | 80  | 8  | 12  |
| -CLLA | 4.0205 | 574 | 57 | 81  |
| -CVMV | 4.0232 | 262 | 26 | 28  |
| -CHIC | 4.0257 | 242 | 24 | 11  |
| -CQIS | 4.059  | 61  | 6  | 20  |
| -CCVS | 4.1004 | 380 | 37 | 32  |
| -CFIT | 4.1065 | 72  | 7  | 5   |
| -CYIT | 4.2206 | 148 | 14 | 18  |
| -CAIA | 4.232  | 212 | 20 | 35  |
| -CTVF | 4.232  | 212 | 20 | 20  |
| -CSIT | 4.2438 | 287 | 27 | 43  |
| -CRIF | 4.303  | 97  | 9  | 6   |
| -CEIC | 4.3119 | 54  | 5  | 5   |
| -CAVA | 4.3149 | 281 | 26 | 38  |
| -CTMC | 4.3168 | 173 | 16 | 13  |
| -CTMA | 4.3212 | 184 | 17 | 36  |
| -CAIM | 4.3303 | 141 | 13 | 13  |
| -CLVM | 4.3667 | 175 | 16 | 44  |
| -CVCV | 4.3769 | 296 | 27 | 25  |

|       |        |     |    |    |
|-------|--------|-----|----|----|
| -CCCQ | 4.3917 | 33  | 3  | 1  |
| -CMIN | 4.3917 | 99  | 9  | 9  |
| -CIMM | 4.3917 | 22  | 2  | 5  |
| -CLIH | 4.3917 | 11  | 1  | 17 |
| -CELC | 4.4117 | 221 | 20 | 25 |
| -CVVQ | 4.4449 | 167 | 15 | 15 |
| -CNIF | 4.4804 | 101 | 9  | 10 |
| -CTIH | 4.4982 | 169 | 15 | 18 |
| -CWVC | 4.5137 | 407 | 36 | 29 |
| -CICF | 4.5145 | 147 | 13 | 7  |
| -CIVM | 4.5248 | 34  | 3  | 12 |
| -CHIA | 4.5514 | 57  | 5  | 6  |
| -CVVN | 4.576  | 298 | 26 | 15 |
| -CPMC | 4.5913 | 161 | 14 | 28 |
| -CKLQ | 4.5913 | 23  | 2  | 21 |
| -CQFM | 4.5913 | 23  | 2  | 13 |
| -CTIQ | 4.5913 | 299 | 26 | 23 |
| -CMVS | 4.608  | 277 | 24 | 39 |
| -CYVS | 4.6612 | 467 | 40 | 55 |
| -CIVG | 4.6769 | 328 | 28 | 28 |
| -CCLS | 4.6849 | 751 | 64 | 88 |
| -CKIC | 4.7111 | 59  | 5  | 10 |
| -CVVF | 4.7184 | 130 | 11 | 26 |
| -CLVT | 4.7377 | 356 | 30 | 56 |
| -CEVC | 4.7602 | 155 | 13 | 13 |
| -CMVC | 4.7909 | 108 | 9  | 5  |
| -CCIH | 4.7909 | 12  | 1  | 5  |
| -CPIV | 4.7909 | 96  | 8  | 19 |
| -CLVN | 4.8575 | 146 | 12 | 20 |
| -CIIV | 4.8908 | 49  | 4  | 11 |
| -CITF | 4.8908 | 98  | 8  | 16 |
| -CNVQ | 4.8998 | 135 | 11 | 23 |
| -CVIF | 4.8998 | 135 | 11 | 11 |
| -CNIL | 4.9011 | 356 | 29 | 18 |
| -CRMC | 4.9092 | 332 | 27 | 25 |
| -CLIF | 4.9138 | 160 | 13 | 21 |
| -CFCM | 4.9204 | 456 | 37 | 17 |
| -CTVN | 4.9388 | 334 | 27 | 24 |
| -CIFQ | 4.9906 | 25  | 2  | 14 |
| -CMIC | 4.9906 | 25  | 2  | 8  |
| -CALA | 5.0191 | 264 | 21 | 37 |
| -CRVM | 5.0191 | 176 | 14 | 34 |
| -CEIL | 5.0305 | 315 | 25 | 23 |
| -CRVA | 5.0806 | 649 | 51 | 52 |
| -CVLC | 5.0845 | 433 | 34 | 44 |
| -CIID | 5.0904 | 51  | 4  | 18 |
| -CFVM | 5.1176 | 141 | 11 | 10 |
| -CAMS | 5.1197 | 218 | 17 | 36 |
| -CVVM | 5.1482 | 245 | 19 | 16 |
| -CNLM | 5.1583 | 323 | 25 | 31 |
| -CCIS | 5.1902 | 156 | 12 | 11 |
| -CIMT | 5.1902 | 273 | 21 | 21 |
| -CIPF | 5.1902 | 13  | 1  | 7  |
| -CMIY | 5.1902 | 13  | 1  | 5  |
| -CVTM | 5.2288 | 406 | 31 | 40 |
| -CMVQ | 5.2301 | 262 | 20 | 16 |
| -CEII | 5.29   | 159 | 12 | 14 |

|       |        |      |     |     |
|-------|--------|------|-----|-----|
| -CVVL | 5.2953 | 504  | 38  | 98  |
| -CMLC | 5.31   | 133  | 10  | 16  |
| -CFLC | 5.3233 | 40   | 3   | 14  |
| -CVVV | 5.3732 | 323  | 24  | 40  |
| -CIII | 5.3898 | 162  | 12  | 16  |
| -CCMM | 5.3898 | 54   | 4   | 16  |
| -CMCQ | 5.3898 | 54   | 4   | 5   |
| -CVCS | 5.412  | 244  | 18  | 25  |
| -CLIM | 5.4231 | 163  | 12  | 16  |
| -CHVA | 5.4297 | 340  | 25  | 35  |
| -CILA | 5.4359 | 177  | 13  | 28  |
| -CIVT | 5.4373 | 286  | 21  | 40  |
| -CTIF | 5.4397 | 109  | 8   | 9   |
| -CTQM | 5.4397 | 109  | 8   | 20  |
| -CIIN | 5.4754 | 96   | 7   | 9   |
| -CAIQ | 5.4896 | 110  | 8   | 14  |
| -CTVL | 5.4896 | 550  | 40  | 110 |
| -CPLQ | 5.5324 | 97   | 7   | 41  |
| -CQLC | 5.5395 | 111  | 8   | 17  |
| -CSVA | 5.5599 | 376  | 27  | 68  |
| -CNVA | 5.5609 | 390  | 28  | 34  |
| -CTVT | 5.569  | 544  | 39  | 47  |
| -CCVT | 5.5894 | 196  | 14  | 23  |
| -CAIH | 5.5894 | 28   | 2   | 20  |
| -CIMQ | 5.5894 | 14   | 1   | 11  |
| -CVIE | 5.6054 | 351  | 25  | 41  |
| -CTIC | 5.6094 | 281  | 20  | 20  |
| -CVIS | 5.6351 | 494  | 35  | 53  |
| -CYLS | 5.641  | 438  | 31  | 82  |
| -CLIT | 5.6427 | 212  | 15  | 19  |
| -CSVQ | 5.6643 | 454  | 32  | 52  |
| -CAVC | 5.675  | 199  | 14  | 33  |
| -CDVC | 5.6892 | 57   | 4   | 14  |
| -CQIM | 5.6892 | 57   | 4   | 6   |
| -CILT | 5.7276 | 373  | 26  | 47  |
| -CVLA | 5.7373 | 388  | 27  | 29  |
| -CAVV | 5.7538 | 245  | 17  | 50  |
| -CSIC | 5.7773 | 246  | 17  | 31  |
| -CVVA | 5.7811 | 362  | 25  | 45  |
| -CNVS | 5.8052 | 538  | 37  | 39  |
| -CVAM | 5.8478 | 249  | 17  | 32  |
| -CYVM | 5.8845 | 339  | 23  | 28  |
| -CIVH | 5.8889 | 59   | 4   | 8   |
| -CTMM | 5.8889 | 118  | 8   | 23  |
| -CLFQ | 5.9316 | 208  | 14  | 17  |
| -CSFM | 5.9677 | 284  | 19  | 15  |
| -CVTS | 5.9887 | 555  | 37  | 52  |
| -CIIQ | 5.9887 | 15   | 1   | 18  |
| -CIIY | 5.9887 | 30   | 2   | 8   |
| -CILF | 6.025  | 166  | 11  | 28  |
| -CVCM | 6.0307 | 287  | 19  | 26  |
| -CVFC | 6.0885 | 61   | 4   | 9   |
| -CSMC | 6.0937 | 580  | 38  | 41  |
| -CLCS | 6.1046 | 474  | 31  | 28  |
| -CLLS | 6.1187 | 1977 | 129 | 121 |
| -CHIM | 6.1339 | 169  | 11  | 10  |
| -CLVA | 6.1408 | 323  | 21  | 31  |

|       |        |      |    |     |
|-------|--------|------|----|-----|
| -CMIV | 6.1484 | 77   | 5  | 24  |
| -CVLT | 6.1505 | 570  | 37 | 38  |
| -CGIM | 6.1883 | 62   | 4  | 8   |
| -CTIV | 6.1957 | 419  | 27 | 39  |
| -CLTQ | 6.2105 | 140  | 9  | 43  |
| -CTIL | 6.2198 | 592  | 38 | 72  |
| -CYIA | 6.247  | 266  | 17 | 22  |
| -CSVV | 6.2756 | 503  | 32 | 28  |
| -CLLC | 6.2881 | 441  | 28 | 37  |
| -CIIT | 6.3153 | 174  | 11 | 24  |
| -CLVS | 6.3225 | 966  | 61 | 88  |
| -CIVS | 6.3265 | 412  | 26 | 57  |
| -CLCM | 6.3547 | 382  | 24 | 43  |
| -CDIQ | 6.3879 | 16   | 1  | 11  |
| -CGFQ | 6.3879 | 16   | 1  | 13  |
| -CNFM | 6.3879 | 128  | 8  | 14  |
| -CTFC | 6.3879 | 16   | 1  | 6   |
| -CHVS | 6.3879 | 336  | 21 | 34  |
| -CSIM | 6.4349 | 274  | 17 | 20  |
| -CWIT | 6.4678 | 81   | 5  | 14  |
| -CCIT | 6.502  | 114  | 7  | 10  |
| -CEVS | 6.5035 | 619  | 38 | 21  |
| -CTIY | 6.521  | 49   | 3  | 10  |
| -CVMT | 6.5476 | 410  | 25 | 63  |
| -CCVC | 6.5523 | 279  | 17 | 19  |
| -CEIY | 6.5876 | 33   | 2  | 6   |
| -CWVS | 6.5876 | 363  | 22 | 14  |
| -CICA | 6.6009 | 248  | 15 | 14  |
| -CAVS | 6.6075 | 331  | 20 | 41  |
| -CAIV | 6.6161 | 116  | 7  | 27  |
| -CLIS | 6.6508 | 683  | 41 | 65  |
| -CNIN | 6.6541 | 100  | 6  | 6   |
| -CWIC | 6.6541 | 50   | 3  | 5   |
| -CVLM | 6.7346 | 641  | 38 | 54  |
| -CLVC | 6.7565 | 220  | 13 | 28  |
| -CYLC | 6.7587 | 237  | 14 | 18  |
| -CAMQ | 6.7872 | 17   | 1  | 17  |
| -CAWM | 6.7872 | 17   | 1  | 10  |
| -CEMM | 6.7872 | 68   | 4  | 6   |
| -CGIA | 6.7872 | 34   | 2  | 9   |
| -CSVV | 6.8014 | 1431 | 84 | 101 |
| -CVMS | 6.8053 | 375  | 22 | 44  |
| -CQIA | 6.8442 | 120  | 7  | 19  |
| -CMIS | 6.862  | 275  | 16 | 19  |
| -CTVC | 6.9203 | 156  | 9  | 27  |
| -CEIT | 6.9469 | 87   | 5  | 9   |
| -CLVQ | 7.0302 | 405  | 23 | 38  |
| -CSIF | 7.0329 | 229  | 13 | 12  |
| -CMFM | 7.0866 | 142  | 8  | 14  |
| -CVMM | 7.0866 | 355  | 20 | 20  |
| -CILS | 7.116  | 909  | 51 | 93  |
| -CIVF | 7.1199 | 107  | 6  | 13  |
| -CDIF | 7.1864 | 18   | 1  | 1   |
| -CTMS | 7.1969 | 685  | 38 | 61  |
| -CVVS | 7.1989 | 577  | 32 | 61  |
| -CFMM | 7.2663 | 273  | 15 | 22  |
| -CVMN | 7.3195 | 55   | 3  | 19  |



|       |        |      |    |     |
|-------|--------|------|----|-----|
| -CTLM | 7.394  | 463  | 25 | 29  |
| -CTII | 7.4859 | 150  | 8  | 27  |
| -CDIS | 7.5058 | 94   | 5  | 23  |
| -CKIV | 7.5058 | 94   | 5  | 19  |
| -CIVC | 7.5191 | 113  | 6  | 18  |
| -CLLM | 7.5221 | 829  | 44 | 57  |
| -CMLQ | 7.5387 | 321  | 17 | 25  |
| -CTIA | 7.5635 | 341  | 18 | 40  |
| -CTIS | 7.5749 | 702  | 37 | 34  |
| -CRIS | 7.63   | 688  | 36 | 57  |
| -CDIM | 7.6471 | 249  | 13 | 20  |
| -CPVM | 7.6583 | 211  | 11 | 22  |
| -CCCF | 7.7187 | 58   | 3  | 5   |
| -CILQ | 7.7419 | 446  | 23 | 24  |
| -CQIL | 7.7454 | 194  | 10 | 26  |
| -CRLC | 7.752  | 466  | 24 | 29  |
| -CALC | 7.7699 | 253  | 13 | 17  |
| -CTVA | 7.7758 | 409  | 21 | 36  |
| -CCIQ | 7.8138 | 137  | 7  | 15  |
| -CLLQ | 7.8231 | 725  | 37 | 38  |
| -CIIG | 7.8252 | 196  | 10 | 7   |
| -CCTM | 7.8518 | 295  | 15 | 28  |
| -CTIN | 7.8904 | 1502 | 76 | 43  |
| -CPCM | 7.9123 | 218  | 11 | 13  |
| -CTLS | 7.935  | 1113 | 56 | 83  |
| -CHVC | 7.9849 | 260  | 13 | 34  |
| -CRIN | 7.9849 | 120  | 6  | 15  |
| -CVMC | 7.9849 | 420  | 21 | 26  |
| -CVIH | 7.9849 | 80   | 4  | 9   |
| -CKVM | 8.0156 | 261  | 13 | 19  |
| -CVLN | 8.0229 | 844  | 42 | 65  |
| -CCIA | 8.0515 | 121  | 6  | 18  |
| -CVCQ | 8.0847 | 81   | 4  | 6   |
| -CALS | 8.091  | 1297 | 64 | 103 |
| -CVAF | 8.118  | 183  | 9  | 18  |
| -CTIM | 8.132  | 387  | 19 | 19  |
| -CVIN | 8.1446 | 102  | 5  | 15  |
| -CLMS | 8.1535 | 919  | 45 | 63  |
| -CRIC | 8.1999 | 267  | 13 | 22  |
| -CLQM | 8.2289 | 371  | 18 | 30  |
| -CLIA | 8.239  | 227  | 11 | 32  |
| -CYIM | 8.2511 | 62   | 3  | 15  |
| -CPMM | 8.2753 | 228  | 11 | 23  |
| -CMIA | 8.2843 | 166  | 8  | 16  |
| -CKIQ | 8.3271 | 146  | 7  | 12  |
| -CPFM | 8.3842 | 21   | 1  | 11  |
| -CEIA | 8.4412 | 148  | 7  | 11  |
| -CRVS | 8.4495 | 1164 | 55 | 79  |
| -CVVT | 8.606  | 388  | 18 | 41  |
| -CCIL | 8.6237 | 324  | 15 | 22  |
| -CTVV | 8.6272 | 497  | 23 | 31  |
| -CFCQ | 8.6503 | 65   | 3  | 4   |
| -CQIV | 8.6503 | 65   | 3  | 7   |
| -CVLQ | 8.6932 | 675  | 31 | 25  |
| -CQVC | 8.7108 | 240  | 11 | 10  |
| -CIMA | 8.7834 | 132  | 6  | 6   |
| -CGIC | 8.7834 | 44   | 2  | 8   |

|        |         |      |    |    |
|--------|---------|------|----|----|
| -CRLM  | 8.81    | 662  | 30 | 75 |
| -CVIL  | 8.9122  | 692  | 31 | 51 |
| -CSIV  | 8.9631  | 449  | 20 | 29 |
| -CSLM  | 8.9761  | 652  | 29 | 59 |
| -CTLA  | 8.9899  | 653  | 29 | 30 |
| -CSMM  | 8.9963  | 338  | 15 | 35 |
| -CIIS  | 9.0115  | 158  | 7  | 19 |
| -CCII  | 9.0401  | 317  | 14 | 15 |
| -CMII  | 9.0496  | 136  | 6  | 17 |
| -CPIL  | 9.0914  | 797  | 35 | 45 |
| -CNMM  | 9.1028  | 114  | 5  | 12 |
| -CVAQ  | 9.1122  | 388  | 17 | 24 |
| -CYVC  | 9.1383  | 206  | 9  | 15 |
| -CCIY  | 9.1826  | 69   | 3  | 6  |
| -CQIF  | 9.1826  | 23   | 1  | 7  |
| -CMIL  | 9.2326  | 185  | 8  | 26 |
| -CTVM  | 9.3278  | 514  | 22 | 44 |
| -CGLM  | 9.347   | 796  | 34 | 52 |
| -CRMM  | 9.3508  | 445  | 19 | 27 |
| -CGVM  | 9.3623  | 469  | 20 | 30 |
| -CCMQ  | 9.3823  | 47   | 2  | 3  |
| -CILN  | 9.3887  | 729  | 31 | 40 |
| -CNLC  | 9.4186  | 519  | 22 | 21 |
| -CYIV  | 9.4222  | 236  | 10 | 20 |
| -CVIG  | 9.473   | 261  | 11 | 19 |
| -CVTF  | 9.4768  | 451  | 19 | 39 |
| -CCLC  | 9.4868  | 499  | 21 | 34 |
| -CWLM  | 9.502   | 119  | 5  | 13 |
| -CNIC  | 9.5819  | 216  | 9  | 20 |
| -CWIA  | 9.696   | 170  | 7  | 20 |
| -CIMS  | 9.7017  | 243  | 10 | 18 |
| -CSIS  | 9.7097  | 608  | 25 | 65 |
| -CVMF  | 9.753   | 171  | 7  | 7  |
| -CVIV  | 9.7815  | 147  | 6  | 23 |
| -CCIF  | 9.8481  | 222  | 9  | 16 |
| -CHIQ  | 9.9811  | 75   | 3  | 13 |
| -CALM  | 9.9811  | 325  | 13 | 31 |
| -CCVN  | 9.9811  | 25   | 1  | 8  |
| -CSVM  | 9.9811  | 250  | 10 | 37 |
| -CSIL  | 10.0118 | 1304 | 52 | 64 |
| -CAMM  | 10.0255 | 452  | 18 | 20 |
| -CLIQ  | 10.0255 | 226  | 9  | 18 |
| -CHVM  | 10.031  | 201  | 8  | 36 |
| -CP II | 10.0952 | 177  | 7  | 16 |
| -CVIA  | 10.1237 | 355  | 14 | 40 |
| -CVIY  | 10.1408 | 127  | 5  | 10 |
| -CPLC  | 10.1586 | 229  | 9  | 25 |
| -CLIC  | 10.2207 | 128  | 5  | 10 |
| -CSLC  | 10.2621 | 694  | 27 | 41 |
| -CPLM  | 10.2624 | 1131 | 44 | 71 |
| -CIIL  | 10.3138 | 620  | 24 | 35 |
| -CDLM  | 10.4111 | 339  | 13 | 24 |
| -CLII  | 10.4945 | 184  | 7  | 17 |
| -CQIC  | 10.5256 | 290  | 11 | 7  |
| -CINM  | 10.58   | 53   | 2  | 9  |
| -CVMY  | 10.58   | 53   | 2  | 9  |
| -CQVM  | 10.6465 | 160  | 6  | 17 |

|       |         |      |    |    |
|-------|---------|------|----|----|
| -CWIM | 10.6465 | 80   | 3  | 15 |
| -CACF | 10.7131 | 161  | 6  | 10 |
| -CRIV | 10.7131 | 322  | 12 | 20 |
| -CRFM | 10.7796 | 567  | 21 | 35 |
| -CMIT | 10.7796 | 27   | 1  | 7  |
| -CFLM | 10.8628 | 653  | 24 | 39 |
| -CAIT | 10.8794 | 218  | 8  | 21 |
| -CCFQ | 11.0902 | 250  | 9  | 15 |
| -CAIN | 11.1789 | 140  | 5  | 18 |
| -CHIL | 11.1789 | 84   | 3  | 21 |
| -CIQM | 11.1789 | 224  | 8  | 14 |
| -CLCQ | 11.1789 | 280  | 10 | 16 |
| -CQIQ | 11.1789 | 56   | 2  | 2  |
| -CRIQ | 11.1789 | 140  | 5  | 12 |
| -CQII | 11.2232 | 253  | 9  | 7  |
| -CVCC | 11.2787 | 113  | 4  | 4  |
| -CNIQ | 11.312  | 85   | 3  | 13 |
| -CSII | 11.35   | 398  | 14 | 29 |
| -CTVS | 11.4017 | 1228 | 43 | 70 |
| -CCIV | 11.464  | 201  | 7  | 10 |
| -CCFM | 11.5055 | 317  | 11 | 23 |
| -CCTQ | 11.5781 | 29   | 1  | 13 |
| -CEIQ | 11.5781 | 58   | 2  | 4  |
| -CVIT | 11.5781 | 87   | 3  | 21 |
| -CAIY | 11.7378 | 147  | 5  | 12 |
| -CVLS | 11.8038 | 1360 | 46 | 95 |
| -CLIV | 11.9411 | 329  | 11 | 33 |
| -CCIN | 11.9774 | 30   | 1  | 7  |
| -CHIF | 11.9774 | 30   | 1  | 6  |
| -CNIA | 12.0661 | 544  | 18 | 19 |
| -CLMM | 12.177  | 305  | 10 | 24 |
| -CIQC | 12.2435 | 92   | 3  | 11 |
| -CKCM | 12.2768 | 123  | 4  | 13 |
| -CILM | 12.3196 | 216  | 7  | 11 |
| -CTLQ | 12.421  | 560  | 18 | 35 |
| -CACM | 12.5762 | 504  | 16 | 18 |
| -CWCM | 12.6871 | 572  | 18 | 12 |
| -CHIV | 12.7759 | 64   | 2  | 15 |
| -CNVC | 12.7759 | 64   | 2  | 13 |
| -CYIC | 12.7759 | 32   | 1  | 8  |
| -CLFM | 12.8646 | 580  | 18 | 22 |
| -CICN | 12.8757 | 129  | 4  | 20 |
| -CRVQ | 13.042  | 98   | 3  | 26 |
| -CLTM | 13.061  | 458  | 14 | 44 |
| -CNIY | 13.1751 | 66   | 2  | 8  |
| -CHLM | 13.3642 | 636  | 19 | 26 |
| -CFIV | 13.3747 | 67   | 2  | 12 |
| -CWMQ | 13.3747 | 67   | 2  | 5  |
| -CAFM | 13.4292 | 370  | 11 | 26 |
| -CSLQ | 13.4679 | 506  | 15 | 47 |
| -CRIA | 13.4888 | 473  | 14 | 26 |
| -CFIA | 13.5743 | 204  | 6  | 20 |
| -CRIT | 13.5743 | 272  | 8  | 23 |
| -CTMQ | 13.6665 | 445  | 13 | 12 |
| -CMIF | 13.8405 | 104  | 3  | 9  |
| -CLCC | 13.8671 | 521  | 15 | 11 |
| -CLMC | 13.9237 | 279  | 8  | 22 |

|       |         |      |    |    |
|-------|---------|------|----|----|
| -CNII | 14.1732 | 426  | 12 | 23 |
| -CIIC | 14.3728 | 72   | 2  | 5  |
| -CIWQ | 14.3728 | 72   | 2  | 5  |
| -CTLQ | 14.3728 | 432  | 12 | 33 |
| -CSIN | 14.4527 | 181  | 5  | 27 |
| -CCIC | 14.4726 | 145  | 4  | 14 |
| -CQLQ | 14.5725 | 146  | 4  | 23 |
| -CCMC | 14.6922 | 368  | 10 | 5  |
| -CAVQ | 14.7322 | 369  | 10 | 17 |
| -CMIQ | 14.7721 | 37   | 1  | 11 |
| -CVIQ | 14.9318 | 187  | 5  | 17 |
| -CIIF | 14.9717 | 75   | 2  | 9  |
| -CVID | 15.0116 | 376  | 10 | 18 |
| -CWCQ | 15.3044 | 230  | 6  | 12 |
| -CPIC | 15.371  | 539  | 14 | 12 |
| -CAMC | 15.4565 | 271  | 7  | 12 |
| -CTTM | 15.5107 | 777  | 20 | 44 |
| -CCLQ | 15.6276 | 274  | 7  | 23 |
| -CYLM | 15.6504 | 196  | 5  | 35 |
| -CIIM | 15.6704 | 157  | 4  | 12 |
| -CIMF | 15.8558 | 278  | 7  | 15 |
| -CDIC | 15.9698 | 120  | 3  | 7  |
| -CHII | 15.9698 | 40   | 1  | 11 |
| -CCLM | 16.3691 | 328  | 8  | 33 |
| -CQIN | 16.3691 | 41   | 1  | 19 |
| -CITM | 16.5687 | 498  | 12 | 9  |
| -CITC | 16.6685 | 167  | 4  | 10 |
| -CQIT | 16.7683 | 84   | 2  | 5  |
| -CSCQ | 17.0345 | 128  | 3  | 10 |
| -CAIL | 17.0877 | 642  | 15 | 40 |
| -CICS | 17.4071 | 218  | 5  | 14 |
| -CSIA | 17.5169 | 351  | 8  | 41 |
| -CLWQ | 17.5668 | 132  | 3  | 21 |
| -CLIL | 17.7034 | 1685 | 38 | 66 |
| -CPVC | 17.7442 | 400  | 9  | 24 |
| -CVII | 17.7949 | 312  | 7  | 23 |
| -CCVM | 17.966  | 90   | 2  | 18 |
| -CSCM | 18.3653 | 276  | 6  | 15 |
| -CALQ | 18.5782 | 698  | 15 | 33 |
| -CNIV | 18.7645 | 141  | 3  | 21 |
| -CWLQ | 18.7645 | 282  | 6  | 18 |
| -CTVQ | 18.8644 | 378  | 8  | 26 |
| -CTCQ | 19.1331 | 623  | 13 | 36 |
| -CMMQ | 19.2636 | 193  | 4  | 23 |
| -CEVM | 19.4299 | 146  | 3  | 22 |
| -CNLQ | 19.4904 | 537  | 11 | 21 |
| -CEIM | 19.563  | 49   | 1  | 11 |
| -CICQ | 19.6961 | 148  | 3  | 5  |
| -CRLQ | 19.7294 | 593  | 12 | 48 |
| -CIIH | 19.7627 | 198  | 4  | 12 |
| -CAII | 20.0954 | 151  | 3  | 2  |
| -CMLM | 20.1619 | 101  | 2  | 21 |
| -CVTC | 20.1619 | 303  | 6  | 12 |
| -CMCM | 20.3615 | 153  | 3  | 7  |
| -CNIM | 20.7608 | 156  | 3  | 16 |
| -CAVM | 21.0269 | 158  | 3  | 24 |
| -CSMQ | 21.3818 | 482  | 9  | 15 |

|       |         |     |    |    |
|-------|---------|-----|----|----|
| -CWIS | 21.6163 | 379 | 7  | 18 |
| -CFMQ | 21.9585 | 55  | 1  | 7  |
| -CPIM | 22.8568 | 458 | 8  | 20 |
| -CTIT | 22.9965 | 288 | 5  | 34 |
| -CWVM | 23.7152 | 297 | 5  | 11 |
| -CAIS | 24.1258 | 423 | 7  | 36 |
| -CTFM | 25.1525 | 63  | 1  | 26 |
| -CLIN | 25.219  | 379 | 6  | 23 |
| -CMIM | 25.3521 | 127 | 2  | 6  |
| -CRCM | 26.065  | 457 | 7  | 28 |
| -CGIQ | 26.1284 | 589 | 9  | 18 |
| -CLMQ | 27.6677 | 693 | 10 | 16 |
| -CPIF | 28.1183 | 493 | 7  | 16 |
| -CQVS | 28.1468 | 141 | 2  | 12 |
| -CYCQ | 28.7013 | 647 | 9  | 6  |
| -CHMM | 29.5442 | 74  | 1  | 14 |
| -CIVN | 31.3408 | 157 | 2  | 17 |
| -CIFC | 31.9396 | 80  | 1  | 4  |
| -CNIS | 32.9378 | 330 | 4  | 30 |
| -CHIS | 34.3351 | 86  | 1  | 21 |
| -CCCM | 35.5329 | 89  | 1  | 3  |
| -CACQ | 39.8247 | 399 | 4  | 16 |
| -CFLQ | 59.6872 | 299 | 2  | 38 |
| -CYCM | 70.6665 | 177 | 1  | 12 |
