# Supplementary material for: Towards the Systematic Mapping and Engineering of the Protein Prenylation Machinery in Saccharomyces cerevisiae
Source: PubMed Central journal article supplement (PMC4358939; doi:10.1371/journal.pone.0120716), 2015-03-13
Supplement: pone.0120716.s003.pdf [file pone.0120716.s003.pdf]

| Motif | Counts |       |       |
|-------|--------|-------|-------|
|       | 37 °C  | 25 °C | Naive |
| CCFD  | 1      | 1     | 1     |
| CCNF  | 1      | 1     | 1     |
| CCNY  | 1      | 1     | 1     |
| CDFI  | 1      | 1     | 1     |
| CDWC  | 1      | 1     | 1     |
| CEDE  | 1      | 1     | 1     |
| CGHF  | 1      | 1     | 1     |
| CHYY  | 1      | 1     | 1     |
| CICD  | 1      | 1     | 1     |
| CIWC  | 1      | 1     | 1     |
| CIYP  | 1      | 1     | 1     |
| CMDC  | 1      | 1     | 1     |
| CMDE  | 1      | 1     | 1     |
| CQEC  | 1      | 1     | 1     |
| CQQE  | 1      | 1     | 1     |
| CQQQ  | 1      | 1     | 1     |
| CQWI  | 1      | 1     | 1     |
| CWEE  | 1      | 1     | 1     |
| CWGH  | 1      | 1     | 1     |
| CWGQ  | 1      | 1     | 1     |
| CWHF  | 1      | 1     | 1     |
| CWIN  | 1      | 1     | 1     |
| CWNM  | 1      | 1     | 1     |
| CYWY  | 1      | 1     | 1     |
| CYYF  | 1      | 1     | 1     |
| CCCI  | 1      | 1     | 2     |
| CCEM  | 1      | 1     | 2     |
| CCYH  | 1      | 1     | 2     |
| CDFE  | 1      | 1     | 2     |
| CDQE  | 1      | 1     | 2     |
| CDWF  | 1      | 1     | 2     |
| CDYW  | 1      | 1     | 2     |
| CEGM  | 1      | 1     | 2     |
| CEKK  | 1      | 1     | 2     |
| CEMK  | 1      | 1     | 2     |
| CEWH  | 1      | 1     | 2     |
| CEWI  | 1      | 1     | 2     |
| CFEW  | 1      | 1     | 2     |
| CFFW  | 1      | 1     | 2     |
| CGFN  | 1      | 1     | 2     |
| CGHW  | 1      | 1     | 2     |
| CHKD  | 1      | 1     | 2     |
| CHMW  | 1      | 1     | 2     |
| CHYW  | 1      | 1     | 2     |
| CIAF  | 1      | 1     | 2     |
| CIEF  | 1      | 1     | 2     |
| CIMI  | 1      | 1     | 2     |
| CIWH  | 1      | 1     | 2     |
| CKDY  | 1      | 1     | 2     |
| CKEA  | 1      | 1     | 2     |

|      |   |   |   |
|------|---|---|---|
| CKFF | 1 | 1 | 2 |
| CKHD | 1 | 1 | 2 |
| CKQP | 1 | 1 | 2 |
| CKWI | 1 | 1 | 2 |
| CMCC | 1 | 1 | 2 |
| CMCK | 1 | 1 | 2 |
| CMDW | 1 | 1 | 2 |
| CMHH | 1 | 1 | 2 |
| CMME | 1 | 1 | 2 |
| CMMW | 1 | 1 | 2 |
| CMQP | 1 | 1 | 2 |
| CNFD | 1 | 1 | 2 |
| CPWC | 1 | 1 | 2 |
| CQCD | 1 | 1 | 2 |
| CQHE | 1 | 1 | 2 |
| CQKW | 1 | 1 | 2 |
| CQNF | 1 | 1 | 2 |
| CQPC | 1 | 1 | 2 |
| CQPD | 1 | 1 | 2 |
| CQWC | 1 | 1 | 2 |
| CVDK | 1 | 1 | 2 |
| CWCW | 1 | 1 | 2 |
| CWDA | 1 | 1 | 2 |
| CWDW | 1 | 1 | 2 |
| CWKF | 1 | 1 | 2 |
| CWKQ | 1 | 1 | 2 |
| CWMF | 1 | 1 | 2 |
| CWMH | 1 | 1 | 2 |
| CWWD | 1 | 1 | 2 |
| CWWN | 1 | 1 | 2 |
| CYCY | 1 | 1 | 2 |
| CYFI | 1 | 1 | 2 |
| CYKW | 1 | 1 | 2 |
| CYWD | 1 | 1 | 2 |
| CCFN | 1 | 1 | 3 |
| CCHM | 1 | 1 | 3 |
| CCQE | 1 | 1 | 3 |
| CDHI | 1 | 1 | 3 |
| CEEI | 1 | 1 | 3 |
| CEHH | 1 | 1 | 3 |
| CEWW | 1 | 1 | 3 |
| CFDW | 1 | 1 | 3 |
| CFEF | 1 | 1 | 3 |
| CFFQ | 1 | 1 | 3 |
| CFHK | 1 | 1 | 3 |
| CFIH | 1 | 1 | 3 |
| CFPW | 1 | 1 | 3 |
| CFWF | 1 | 1 | 3 |
| CFWK | 1 | 1 | 3 |
| CFYC | 1 | 1 | 3 |
| CHFF | 1 | 1 | 3 |
| CHFN | 1 | 1 | 3 |
| CHHF | 1 | 1 | 3 |
| CHHW | 1 | 1 | 3 |

|      |   |   |   |
|------|---|---|---|
| CHIP | 1 | 1 | 3 |
| CHKM | 1 | 1 | 3 |
| CHYF | 1 | 1 | 3 |
| CHYQ | 1 | 1 | 3 |
| CIED | 1 | 1 | 3 |
| CIFE | 1 | 1 | 3 |
| CKDK | 1 | 1 | 3 |
| CKFI | 1 | 1 | 3 |
| CKIF | 1 | 1 | 3 |
| CKMW | 1 | 1 | 3 |
| CKNI | 1 | 1 | 3 |
| CKYI | 1 | 1 | 3 |
| CMFC | 1 | 1 | 3 |
| CMFD | 1 | 1 | 3 |
| CMKH | 1 | 1 | 3 |
| CMWW | 1 | 1 | 3 |
| CMYF | 1 | 1 | 3 |
| CNFY | 1 | 1 | 3 |
| CNYQ | 1 | 1 | 3 |
| CNYW | 1 | 1 | 3 |
| CQCW | 1 | 1 | 3 |
| CQDC | 1 | 1 | 3 |
| CQEA | 1 | 1 | 3 |
| CQHA | 1 | 1 | 3 |
| CQNN | 1 | 1 | 3 |
| CQNW | 1 | 1 | 3 |
| CQQY | 1 | 1 | 3 |
| CQWM | 1 | 1 | 3 |
| CQYE | 1 | 1 | 3 |
| CQYW | 1 | 1 | 3 |
| CWAH | 1 | 1 | 3 |
| CWCI | 1 | 1 | 3 |
| CWCY | 1 | 1 | 3 |
| CWDP | 1 | 1 | 3 |
| CWEQ | 1 | 1 | 3 |
| CWFF | 1 | 1 | 3 |
| CWII | 1 | 1 | 3 |
| CWIW | 1 | 1 | 3 |
| CWNC | 1 | 1 | 3 |
| CWQF | 1 | 1 | 3 |
| CWWE | 1 | 1 | 3 |
| CYAC | 1 | 1 | 3 |
| CYYY | 1 | 1 | 3 |
| CAHH | 1 | 1 | 4 |
| CCCG | 1 | 1 | 4 |
| CCEA | 1 | 1 | 4 |
| CCMN | 1 | 1 | 4 |
| CCNW | 1 | 1 | 4 |
| CCWF | 1 | 1 | 4 |
| CEDM | 1 | 1 | 4 |
| CEEQ | 1 | 1 | 4 |
| CEFQ | 1 | 1 | 4 |
| CEHC | 1 | 1 | 4 |
| CEKI | 1 | 1 | 4 |

|      |   |   |   |
|------|---|---|---|
| CEQF | 1 | 1 | 4 |
| CEQQ | 1 | 1 | 4 |
| CEWF | 1 | 1 | 4 |
| CFFY | 1 | 1 | 4 |
| CFKE | 1 | 1 | 4 |
| CFKI | 1 | 1 | 4 |
| CFMF | 1 | 1 | 4 |
| CFWE | 1 | 1 | 4 |
| CHCG | 1 | 1 | 4 |
| CHHK | 1 | 1 | 4 |
| CHNF | 1 | 1 | 4 |
| CHQP | 1 | 1 | 4 |
| CHWY | 1 | 1 | 4 |
| CICE | 1 | 1 | 4 |
| CIKI | 1 | 1 | 4 |
| CIWM | 1 | 1 | 4 |
| CIYF | 1 | 1 | 4 |
| CKDC | 1 | 1 | 4 |
| CKEW | 1 | 1 | 4 |
| CKQY | 1 | 1 | 4 |
| CMCI | 1 | 1 | 4 |
| CMDF | 1 | 1 | 4 |
| CMFF | 1 | 1 | 4 |
| CMQM | 1 | 1 | 4 |
| CMQY | 1 | 1 | 4 |
| CNCD | 1 | 1 | 4 |
| CNWF | 1 | 1 | 4 |
| CNWI | 1 | 1 | 4 |
| CPPW | 1 | 1 | 4 |
| CPQD | 1 | 1 | 4 |
| CQCK | 1 | 1 | 4 |
| CQEF | 1 | 1 | 4 |
| CQHC | 1 | 1 | 4 |
| CQHF | 1 | 1 | 4 |
| CQHN | 1 | 1 | 4 |
| CQPE | 1 | 1 | 4 |
| CQPK | 1 | 1 | 4 |
| CQQM | 1 | 1 | 4 |
| CQYQ | 1 | 1 | 4 |
| CQYY | 1 | 1 | 4 |
| CTWI | 1 | 1 | 4 |
| CWDV | 1 | 1 | 4 |
| CWEI | 1 | 1 | 4 |
| CWFW | 1 | 1 | 4 |
| CWGF | 1 | 1 | 4 |
| CWHD | 1 | 1 | 4 |
| CWHE | 1 | 1 | 4 |
| CWKK | 1 | 1 | 4 |
| CWKV | 1 | 1 | 4 |
| CWQH | 1 | 1 | 4 |
| CWVY | 1 | 1 | 4 |
| CWWI | 1 | 1 | 4 |
| CWWW | 1 | 1 | 4 |
| CWYC | 1 | 1 | 4 |

|      |   |   |   |
|------|---|---|---|
| CWYY | 1 | 1 | 4 |
| CYFY | 1 | 1 | 4 |
| CYNE | 1 | 1 | 4 |
| CYQY | 1 | 1 | 4 |
| CYWW | 1 | 1 | 4 |
| CAQQ | 1 | 1 | 5 |
| CAAH | 1 | 1 | 5 |
| CCDC | 1 | 1 | 5 |
| CCFH | 1 | 1 | 5 |
| CCNG | 1 | 1 | 5 |
| CCQF | 1 | 1 | 5 |
| CCWT | 1 | 1 | 5 |
| CCWV | 1 | 1 | 5 |
| CCWW | 1 | 1 | 5 |
| CDCW | 1 | 1 | 5 |
| CDIY | 1 | 1 | 5 |
| CDWI | 1 | 1 | 5 |
| CEDF | 1 | 1 | 5 |
| CEFV | 1 | 1 | 5 |
| CEGW | 1 | 1 | 5 |
| CEHQ | 1 | 1 | 5 |
| CEID | 1 | 1 | 5 |
| CEKY | 1 | 1 | 5 |
| CEPI | 1 | 1 | 5 |
| CEYK | 1 | 1 | 5 |
| CFEC | 1 | 1 | 5 |
| CFFD | 1 | 1 | 5 |
| CFHH | 1 | 1 | 5 |
| CFHI | 1 | 1 | 5 |
| CFMW | 1 | 1 | 5 |
| CFWG | 1 | 1 | 5 |
| CFWH | 1 | 1 | 5 |
| CFWW | 1 | 1 | 5 |
| CFWY | 1 | 1 | 5 |
| CGGC | 1 | 1 | 5 |
| CGQY | 1 | 1 | 5 |
| CHCA | 1 | 1 | 5 |
| CHFV | 1 | 1 | 5 |
| CHNW | 1 | 1 | 5 |
| CHWQ | 1 | 1 | 5 |
| CIEW | 1 | 1 | 5 |
| CIFP | 1 | 1 | 5 |
| CINC | 1 | 1 | 5 |
| CINP | 1 | 1 | 5 |
| CIVW | 1 | 1 | 5 |
| CKCE | 1 | 1 | 5 |
| CKHY | 1 | 1 | 5 |
| CKIW | 1 | 1 | 5 |
| CKQH | 1 | 1 | 5 |
| CKWF | 1 | 1 | 5 |
| CKYQ | 1 | 1 | 5 |
| CMCW | 1 | 1 | 5 |
| CMFH | 1 | 1 | 5 |
| CMKF | 1 | 1 | 5 |

|      |   |   |   |
|------|---|---|---|
| CMMY | 1 | 1 | 5 |
| CMPG | 1 | 1 | 5 |
| CMYW | 1 | 1 | 5 |
| CNCC | 1 | 1 | 5 |
| CNDC | 1 | 1 | 5 |
| CNFQ | 1 | 1 | 5 |
| CNMI | 1 | 1 | 5 |
| CNQH | 1 | 1 | 5 |
| CQDW | 1 | 1 | 5 |
| CQFH | 1 | 1 | 5 |
| CQHI | 1 | 1 | 5 |
| CQIW | 1 | 1 | 5 |
| CQWE | 1 | 1 | 5 |
| CQWH | 1 | 1 | 5 |
| CQWW | 1 | 1 | 5 |
| CQYM | 1 | 1 | 5 |
| CWCC | 1 | 1 | 5 |
| CWCN | 1 | 1 | 5 |
| CWDC | 1 | 1 | 5 |
| CWDD | 1 | 1 | 5 |
| CWFY | 1 | 1 | 5 |
| CWMA | 1 | 1 | 5 |
| CWMD | 1 | 1 | 5 |
| CWNW | 1 | 1 | 5 |
| CWPP | 1 | 1 | 5 |
| CWQI | 1 | 1 | 5 |
| CWQP | 1 | 1 | 5 |
| CWWV | 1 | 1 | 5 |
| CYFA | 1 | 1 | 5 |
| CYFG | 1 | 1 | 5 |
| CYFW | 1 | 1 | 5 |
| CYHY | 1 | 1 | 5 |
| CYWF | 1 | 1 | 5 |
| CACY | 1 | 1 | 6 |
| CADM | 1 | 1 | 6 |
| CAQC | 1 | 1 | 6 |
| CCGI | 1 | 1 | 6 |
| CCNI | 1 | 1 | 6 |
| CCQN | 1 | 1 | 6 |
| CCWK | 1 | 1 | 6 |
| CDCC | 1 | 1 | 6 |
| CDEG | 1 | 1 | 6 |
| CDFY | 1 | 1 | 6 |
| CDTA | 1 | 1 | 6 |
| CDWH | 1 | 1 | 6 |
| CEAF | 1 | 1 | 6 |
| CEDC | 1 | 1 | 6 |
| CEFA | 1 | 1 | 6 |
| CEFF | 1 | 1 | 6 |
| CEHY | 1 | 1 | 6 |
| CEME | 1 | 1 | 6 |
| CEQD | 1 | 1 | 6 |
| CFKC | 1 | 1 | 6 |
| CFKH | 1 | 1 | 6 |

|      |   |   |   |
|------|---|---|---|
| CFQD | 1 | 1 | 6 |
| CFQF | 1 | 1 | 6 |
| CFYD | 1 | 1 | 6 |
| CFYF | 1 | 1 | 6 |
| CFYG | 1 | 1 | 6 |
| CGFW | 1 | 1 | 6 |
| CGQF | 1 | 1 | 6 |
| CGWH | 1 | 1 | 6 |
| CGWI | 1 | 1 | 6 |
| CGWM | 1 | 1 | 6 |
| CGYW | 1 | 1 | 6 |
| CHCC | 1 | 1 | 6 |
| CHCF | 1 | 1 | 6 |
| CHHC | 1 | 1 | 6 |
| CHQC | 1 | 1 | 6 |
| CHWK | 1 | 1 | 6 |
| CIEC | 1 | 1 | 6 |
| CIWE | 1 | 1 | 6 |
| CIWI | 1 | 1 | 6 |
| CIYW | 1 | 1 | 6 |
| CKKW | 1 | 1 | 6 |
| CMEA | 1 | 1 | 6 |
| CMFP | 1 | 1 | 6 |
| CMHF | 1 | 1 | 6 |
| CMQH | 1 | 1 | 6 |
| CMQQ | 1 | 1 | 6 |
| CMWY | 1 | 1 | 6 |
| CNCA | 1 | 1 | 6 |
| CNCW | 1 | 1 | 6 |
| CNDI | 1 | 1 | 6 |
| CNNI | 1 | 1 | 6 |
| CNQQ | 1 | 1 | 6 |
| CNWC | 1 | 1 | 6 |
| CNYC | 1 | 1 | 6 |
| CPFF | 1 | 1 | 6 |
| CPHF | 1 | 1 | 6 |
| CQDF | 1 | 1 | 6 |
| CQDM | 1 | 1 | 6 |
| CQFN | 1 | 1 | 6 |
| CQHK | 1 | 1 | 6 |
| CQHP | 1 | 1 | 6 |
| CQKQ | 1 | 1 | 6 |
| CQMY | 1 | 1 | 6 |
| CQPG | 1 | 1 | 6 |
| CQQK | 1 | 1 | 6 |
| CQQP | 1 | 1 | 6 |
| CQVH | 1 | 1 | 6 |
| CTWW | 1 | 1 | 6 |
| CVQH | 1 | 1 | 6 |
| CWAF | 1 | 1 | 6 |
| CWCF | 1 | 1 | 6 |
| CWEK | 1 | 1 | 6 |
| CWFE | 1 | 1 | 6 |
| CWGK | 1 | 1 | 6 |

|      |   |   |   |
|------|---|---|---|
| CWHH | 1 | 1 | 6 |
| CWMY | 1 | 1 | 6 |
| CWNN | 1 | 1 | 6 |
| CWNY | 1 | 1 | 6 |
| CWPF | 1 | 1 | 6 |
| CWTY | 1 | 1 | 6 |
| CWVH | 1 | 1 | 6 |
| CWYW | 1 | 1 | 6 |
| CYFF | 1 | 1 | 6 |
| CYFM | 1 | 1 | 6 |
| CYMC | 1 | 1 | 6 |
| CYNP | 1 | 1 | 6 |
| CYWC | 1 | 1 | 6 |
| CYWN | 1 | 1 | 6 |
| CCCE | 1 | 1 | 7 |
| CCEG | 1 | 1 | 7 |
| CCGH | 1 | 1 | 7 |
| CCIW | 1 | 1 | 7 |
| CCKW | 1 | 1 | 7 |
| CCKY | 1 | 1 | 7 |
| CCNM | 1 | 1 | 7 |
| CCPH | 1 | 1 | 7 |
| CCQW | 1 | 1 | 7 |
| CCTH | 1 | 1 | 7 |
| CCVE | 1 | 1 | 7 |
| CCWL | 1 | 1 | 7 |
| CCWM | 1 | 1 | 7 |
| CCWP | 1 | 1 | 7 |
| CCYI | 1 | 1 | 7 |
| CDNI | 1 | 1 | 7 |
| CEEG | 1 | 1 | 7 |
| CEQM | 1 | 1 | 7 |
| CEWC | 1 | 1 | 7 |
| CFFF | 1 | 1 | 7 |
| CFKM | 1 | 1 | 7 |
| CFYP | 1 | 1 | 7 |
| CGAH | 1 | 1 | 7 |
| CGFC | 1 | 1 | 7 |
| CGFE | 1 | 1 | 7 |
| CGPQ | 1 | 1 | 7 |
| CGWW | 1 | 1 | 7 |
| CHDG | 1 | 1 | 7 |
| CHFD | 1 | 1 | 7 |
| CHWW | 1 | 1 | 7 |
| CHYI | 1 | 1 | 7 |
| CICW | 1 | 1 | 7 |
| CIEY | 1 | 1 | 7 |
| CIFI | 1 | 1 | 7 |
| CIPQ | 1 | 1 | 7 |
| CIYI | 1 | 1 | 7 |
| CKDD | 1 | 1 | 7 |
| CKHH | 1 | 1 | 7 |
| CKWY | 1 | 1 | 7 |
| CLWY | 1 | 1 | 7 |



|      |   |   |   |
|------|---|---|---|
| CMCT | 1 | 1 | 7 |
| CMGW | 1 | 1 | 7 |
| CMHQ | 1 | 1 | 7 |
| CMRM | 1 | 1 | 7 |
| CMWC | 1 | 1 | 7 |
| CNHH | 1 | 1 | 7 |
| CNKE | 1 | 1 | 7 |
| CPAQ | 1 | 1 | 7 |
| CPQM | 1 | 1 | 7 |
| CPWH | 1 | 1 | 7 |
| CQCH | 1 | 1 | 7 |
| CQEI | 1 | 1 | 7 |
| CQHG | 1 | 1 | 7 |
| CQPH | 1 | 1 | 7 |
| CQPM | 1 | 1 | 7 |
| CQRW | 1 | 1 | 7 |
| CQWK | 1 | 1 | 7 |
| CRHW | 1 | 1 | 7 |
| CRYI | 1 | 1 | 7 |
| CTQP | 1 | 1 | 7 |
| CTYY | 1 | 1 | 7 |
| CVFH | 1 | 1 | 7 |
| CVWY | 1 | 1 | 7 |
| CWDF | 1 | 1 | 7 |
| CWDN | 1 | 1 | 7 |
| CWIK | 1 | 1 | 7 |
| CWKM | 1 | 1 | 7 |
| CWKW | 1 | 1 | 7 |
| CWMI | 1 | 1 | 7 |
| CWND | 1 | 1 | 7 |
| CWVE | 1 | 1 | 7 |
| CWWC | 1 | 1 | 7 |
| CWYN | 1 | 1 | 7 |
| CYCW | 1 | 1 | 7 |
| CYFY | 1 | 1 | 7 |
| CYMM | 1 | 1 | 7 |
| CYQC | 1 | 1 | 7 |
| CYQD | 1 | 1 | 7 |
| CYWK | 1 | 1 | 7 |
| CAED | 1 | 1 | 8 |
| CCIK | 1 | 1 | 8 |
| CCKC | 1 | 1 | 8 |
| CCQG | 1 | 1 | 8 |
| CCYN | 1 | 1 | 8 |
| CDQA | 1 | 1 | 8 |
| CDWY | 1 | 1 | 8 |
| CDYI | 1 | 1 | 8 |
| CEQP | 1 | 1 | 8 |
| CETQ | 1 | 1 | 8 |
| CEVF | 1 | 1 | 8 |
| CEWY | 1 | 1 | 8 |
| CFCF | 1 | 1 | 8 |
| CFCN | 1 | 1 | 8 |
| CFHN | 1 | 1 | 8 |

|      |   |   |   |
|------|---|---|---|
| CFIK | 1 | 1 | 8 |
| CFYA | 1 | 1 | 8 |
| CFYW | 1 | 1 | 8 |
| CGCW | 1 | 1 | 8 |
| CGFY | 1 | 1 | 8 |
| CGHE | 1 | 1 | 8 |
| CGQD | 1 | 1 | 8 |
| CHEK | 1 | 1 | 8 |
| CHFQ | 1 | 1 | 8 |
| CHMF | 1 | 1 | 8 |
| CIAN | 1 | 1 | 8 |
| CIFW | 1 | 1 | 8 |
| CIQP | 1 | 1 | 8 |
| CKQQ | 1 | 1 | 8 |
| CKWE | 1 | 1 | 8 |
| CKWR | 1 | 1 | 8 |
| CKYG | 1 | 1 | 8 |
| CMCN | 1 | 1 | 8 |
| CMDY | 1 | 1 | 8 |
| CMEC | 1 | 1 | 8 |
| CMEI | 1 | 1 | 8 |
| CMHC | 1 | 1 | 8 |
| CMMI | 1 | 1 | 8 |
| CMQF | 1 | 1 | 8 |
| CMWM | 1 | 1 | 8 |
| CMYM | 1 | 1 | 8 |
| CNEN | 1 | 1 | 8 |
| CNIW | 1 | 1 | 8 |
| CNNE | 1 | 1 | 8 |
| CQCC | 1 | 1 | 8 |
| CQDN | 1 | 1 | 8 |
| CQKA | 1 | 1 | 8 |
| CQSK | 1 | 1 | 8 |
| CQWF | 1 | 1 | 8 |
| CQWR | 1 | 1 | 8 |
| CTWY | 1 | 1 | 8 |
| CVHH | 1 | 1 | 8 |
| CWFI | 1 | 1 | 8 |
| CWHK | 1 | 1 | 8 |
| CWIH | 1 | 1 | 8 |
| CWNQ | 1 | 1 | 8 |
| CWQW | 1 | 1 | 8 |
| CWRF | 1 | 1 | 8 |
| CWRI | 1 | 1 | 8 |
| CYKH | 1 | 1 | 8 |
| CYMW | 1 | 1 | 8 |
| CYQQ | 1 | 1 | 8 |
| CAHQ | 1 | 1 | 9 |
| CANH | 1 | 1 | 9 |
| CAPC | 1 | 1 | 9 |
| CAQP | 1 | 1 | 9 |
| CAYC | 1 | 1 | 9 |
| CAYQ | 1 | 1 | 9 |
| CCAC | 1 | 1 | 9 |

|      |   |   |    |
|------|---|---|----|
| CCCW | 1 | 1 | 9  |
| CCLW | 1 | 1 | 9  |
| CEQH | 1 | 1 | 9  |
| CFAW | 1 | 1 | 9  |
| CFDH | 1 | 1 | 9  |
| CFDI | 1 | 1 | 9  |
| CFFC | 1 | 1 | 9  |
| CFFN | 1 | 1 | 9  |
| CFNC | 1 | 1 | 9  |
| CFWC | 1 | 1 | 9  |
| CFWV | 1 | 1 | 9  |
| CFYH | 1 | 1 | 9  |
| CGWF | 1 | 1 | 9  |
| CHCN | 1 | 1 | 9  |
| CHKW | 1 | 1 | 9  |
| CHMN | 1 | 1 | 9  |
| CHNH | 1 | 1 | 9  |
| CHNI | 1 | 1 | 9  |
| CHQQ | 1 | 1 | 9  |
| CICP | 1 | 1 | 9  |
| CIHF | 1 | 1 | 9  |
| CIHQ | 1 | 1 | 9  |
| CIWW | 1 | 1 | 9  |
| CIWY | 1 | 1 | 9  |
| CKCT | 1 | 1 | 9  |
| CMMN | 1 | 1 | 9  |
| CMQC | 1 | 1 | 9  |
| CMQN | 1 | 1 | 9  |
| CMWI | 1 | 1 | 9  |
| CMYC | 1 | 1 | 9  |
| CNQI | 1 | 1 | 9  |
| CQFF | 1 | 1 | 9  |
| CQPF | 1 | 1 | 9  |
| CSNQ | 1 | 1 | 9  |
| CSQP | 1 | 1 | 9  |
| CTWH | 1 | 1 | 9  |
| CWCG | 1 | 1 | 9  |
| CWFA | 1 | 1 | 9  |
| CWFC | 1 | 1 | 9  |
| CWFV | 1 | 1 | 9  |
| CWHA | 1 | 1 | 9  |
| CWIE | 1 | 1 | 9  |
| CWMW | 1 | 1 | 9  |
| CWTN | 1 | 1 | 9  |
| CWTW | 1 | 1 | 9  |
| CWVF | 1 | 1 | 9  |
| CYCE | 1 | 1 | 9  |
| CYMG | 1 | 1 | 9  |
| CYWI | 1 | 1 | 9  |
| CAQH | 1 | 1 | 10 |
| CAWH | 1 | 1 | 10 |
| CDFW | 1 | 1 | 10 |
| CDWK | 1 | 1 | 10 |
| CGMF | 1 | 1 | 10 |

|      |   |   |    |
|------|---|---|----|
| CGQQ | 1 | 1 | 10 |
| CHIW | 1 | 1 | 10 |
| CHKI | 1 | 1 | 10 |
| CHME | 1 | 1 | 10 |
| CIGW | 1 | 1 | 10 |
| CIQH | 1 | 1 | 10 |
| CMAA | 1 | 1 | 10 |
| CMEW | 1 | 1 | 10 |
| CMFK | 1 | 1 | 10 |
| CMKV | 1 | 1 | 10 |
| CMNY | 1 | 1 | 10 |
| CMWH | 1 | 1 | 10 |
| CNGC | 1 | 1 | 10 |
| CNQT | 1 | 1 | 10 |
| CPYI | 1 | 1 | 10 |
| CQFL | 1 | 1 | 10 |
| CQHW | 1 | 1 | 10 |
| CQHY | 1 | 1 | 10 |
| CQKC | 1 | 1 | 10 |
| CQPP | 1 | 1 | 10 |
| CQQF | 1 | 1 | 10 |
| CQQH | 1 | 1 | 10 |
| CQWA | 1 | 1 | 10 |
| CQWN | 1 | 1 | 10 |
| CRNW | 1 | 1 | 10 |
| CRQP | 1 | 1 | 10 |
| CVQF | 1 | 1 | 10 |
| CWEY | 1 | 1 | 10 |
| CWFT | 1 | 1 | 10 |
| CWYF | 1 | 1 | 10 |
| CYCH | 1 | 1 | 10 |
| CYFP | 1 | 1 | 10 |
| CYHC | 1 | 1 | 10 |
| CYID | 1 | 1 | 10 |
| CYLF | 1 | 1 | 10 |
| CADY | 1 | 1 | 11 |
| CAFW | 1 | 1 | 11 |
| CANN | 1 | 1 | 11 |
| CEPK | 1 | 1 | 11 |
| CFHD | 1 | 1 | 11 |
| CFIE | 1 | 1 | 11 |
| CFIW | 1 | 1 | 11 |
| CFKY | 1 | 1 | 11 |
| CFNP | 1 | 1 | 11 |
| CFWM | 1 | 1 | 11 |
| CGWC | 1 | 1 | 11 |
| CHPF | 1 | 1 | 11 |
| CHYN | 1 | 1 | 11 |
| CIAW | 1 | 1 | 11 |
| CIRF | 1 | 1 | 11 |
| CIYA | 1 | 1 | 11 |
| CKWC | 1 | 1 | 11 |
| CLFY | 1 | 1 | 11 |
| CMHG | 1 | 1 | 11 |

|      |   |   |    |
|------|---|---|----|
| CMMV | 1 | 1 | 11 |
| CMRF | 1 | 1 | 11 |
| CMWN | 1 | 1 | 11 |
| CMYY | 1 | 1 | 11 |
| CNMH | 1 | 1 | 11 |
| CPCC | 1 | 1 | 11 |
| CPMQ | 1 | 1 | 11 |
| CPQN | 1 | 1 | 11 |
| CPYH | 1 | 1 | 11 |
| CQCY | 1 | 1 | 11 |
| CQFY | 1 | 1 | 11 |
| CQHQ | 1 | 1 | 11 |
| CQPQ | 1 | 1 | 11 |
| CQPT | 1 | 1 | 11 |
| CQTH | 1 | 1 | 11 |
| CSWM | 1 | 1 | 11 |
| CTHM | 1 | 1 | 11 |
| CVHY | 1 | 1 | 11 |
| CVQQ | 1 | 1 | 11 |
| CWAC | 1 | 1 | 11 |
| CWIY | 1 | 1 | 11 |
| CWNH | 1 | 1 | 11 |
| CWVP | 1 | 1 | 11 |
| CWWH | 1 | 1 | 11 |
| CYFC | 1 | 1 | 11 |
| CYYN | 1 | 1 | 11 |
| CYYQ | 1 | 1 | 11 |
| CAPQ | 1 | 1 | 12 |
| CCCK | 1 | 1 | 12 |
| CEPE | 1 | 1 | 12 |
| CEYC | 1 | 1 | 12 |
| CFHT | 1 | 1 | 12 |
| CFLD | 1 | 1 | 12 |
| CGEC | 1 | 1 | 12 |
| CHHM | 1 | 1 | 12 |
| CHLY | 1 | 1 | 12 |
| CHPM | 1 | 1 | 12 |
| CHTH | 1 | 1 | 12 |
| CIFF | 1 | 1 | 12 |
| CKNK | 1 | 1 | 12 |
| CKWK | 1 | 1 | 12 |
| CKYW | 1 | 1 | 12 |
| CMFY | 1 | 1 | 12 |
| CMWG | 1 | 1 | 12 |
| CMYN | 1 | 1 | 12 |
| CPFW | 1 | 1 | 12 |
| CPQQ | 1 | 1 | 12 |
| CQAF | 1 | 1 | 12 |
| CQPV | 1 | 1 | 12 |
| CQPW | 1 | 1 | 12 |
| CRKC | 1 | 1 | 12 |
| CSCW | 1 | 1 | 12 |
| CTCK | 1 | 1 | 12 |
| CVFY | 1 | 1 | 12 |

|      |   |   |    |
|------|---|---|----|
| CWFD | 1 | 1 | 12 |
| CWSF | 1 | 1 | 12 |
| CWWQ | 1 | 1 | 12 |
| CWYT | 1 | 1 | 12 |
| CYAM | 1 | 1 | 12 |
| CYQH | 1 | 1 | 12 |
| CYRF | 1 | 1 | 12 |
| CYYC | 1 | 1 | 12 |
| CCFG | 1 | 1 | 13 |
| CDHW | 1 | 1 | 13 |
| CFSY | 1 | 1 | 13 |
| CGYQ | 1 | 1 | 13 |
| CHPW | 1 | 1 | 13 |
| CHQW | 1 | 1 | 13 |
| CHVF | 1 | 1 | 13 |
| CHYM | 1 | 1 | 13 |
| CIKG | 1 | 1 | 13 |
| CIWF | 1 | 1 | 13 |
| CKFV | 1 | 1 | 13 |
| CKHM | 1 | 1 | 13 |
| CKPQ | 1 | 1 | 13 |
| CPKI | 1 | 1 | 13 |
| CPMF | 1 | 1 | 13 |
| CPWN | 1 | 1 | 13 |
| CQWY | 1 | 1 | 13 |
| CRQH | 1 | 1 | 13 |
| CWIR | 1 | 1 | 13 |
| CWLW | 1 | 1 | 13 |
| CWPW | 1 | 1 | 13 |
| CWQL | 1 | 1 | 13 |
| CWVW | 1 | 1 | 13 |
| CYHW | 1 | 1 | 13 |
| CYKK | 1 | 1 | 13 |
| CYMF | 1 | 1 | 13 |
| CYNY | 1 | 1 | 13 |
| CYRI | 1 | 1 | 13 |
| CYTF | 1 | 1 | 13 |
| CYVN | 1 | 1 | 13 |
| CANP | 1 | 1 | 14 |
| CCGW | 1 | 1 | 14 |
| CDYH | 1 | 1 | 14 |
| CFHA | 1 | 1 | 14 |
| CHMQ | 1 | 1 | 14 |
| CHRY | 1 | 1 | 14 |
| CIQR | 1 | 1 | 14 |
| CIWN | 1 | 1 | 14 |
| CKDW | 1 | 1 | 14 |
| CKMY | 1 | 1 | 14 |
| CMCY | 1 | 1 | 14 |
| CMSF | 1 | 1 | 14 |
| CQFQ | 1 | 1 | 14 |
| CTNY | 1 | 1 | 14 |
| CVNQ | 1 | 1 | 14 |
| CWFP | 1 | 1 | 14 |

|      |   |   |    |
|------|---|---|----|
| CYFK | 1 | 1 | 14 |
| CAIW | 1 | 1 | 15 |
| CCFW | 1 | 1 | 15 |
| CEVQ | 1 | 1 | 15 |
| CFHM | 1 | 1 | 15 |
| CFMV | 1 | 1 | 15 |
| CFNI | 1 | 1 | 15 |
| CFPF | 1 | 1 | 15 |
| CHMK | 1 | 1 | 15 |
| CHNQ | 1 | 1 | 15 |
| CIEQ | 1 | 1 | 15 |
| CKYY | 1 | 1 | 15 |
| CRWH | 1 | 1 | 15 |
| CTQY | 1 | 1 | 15 |
| CVYC | 1 | 1 | 15 |
| CVYW | 1 | 1 | 15 |
| CWPV | 1 | 1 | 15 |
| CWWT | 1 | 1 | 15 |
| CYDK | 1 | 1 | 15 |
| CYFV | 1 | 1 | 15 |
| CADN | 1 | 1 | 16 |
| CAQM | 1 | 1 | 16 |
| CATH | 1 | 1 | 16 |
| CAYW | 1 | 1 | 16 |
| CCWY | 1 | 1 | 16 |
| CDYF | 1 | 1 | 16 |
| CFTP | 1 | 1 | 16 |
| CHCT | 1 | 1 | 16 |
| CHQM | 1 | 1 | 16 |
| CHYD | 1 | 1 | 16 |
| CKTM | 1 | 1 | 16 |
| CLFF | 1 | 1 | 16 |
| CMEY | 1 | 1 | 16 |
| CMWL | 1 | 1 | 16 |
| CPHQ | 1 | 1 | 16 |
| CRAF | 1 | 1 | 16 |
| CSFI | 1 | 1 | 16 |
| CTPQ | 1 | 1 | 16 |
| CVYQ | 1 | 1 | 16 |
| CWHG | 1 | 1 | 16 |
| CWKR | 1 | 1 | 16 |
| CYYI | 1 | 1 | 16 |
| CCDN | 1 | 1 | 17 |
| CFHL | 1 | 1 | 17 |
| CFYI | 1 | 1 | 17 |
| CHAM | 1 | 1 | 17 |
| CIDF | 1 | 1 | 17 |
| CLHC | 1 | 1 | 17 |
| CLWW | 1 | 1 | 17 |
| CMPW | 1 | 1 | 17 |
| CMWP | 1 | 1 | 17 |
| CNVW | 1 | 1 | 17 |
| CNYY | 1 | 1 | 17 |
| CQPI | 1 | 1 | 17 |

|      |   |   |    |
|------|---|---|----|
| CSMW | 1 | 1 | 17 |
| CTIW | 1 | 1 | 17 |
| CVWN | 1 | 1 | 17 |
| CWLF | 1 | 1 | 17 |
| CAAQ | 1 | 1 | 18 |
| CCWS | 1 | 1 | 18 |
| CGGW | 1 | 1 | 18 |
| CHNK | 1 | 1 | 18 |
| CKHL | 1 | 1 | 18 |
| CKYC | 1 | 1 | 18 |
| CPFT | 1 | 1 | 18 |
| CPRW | 1 | 1 | 18 |
| CPWA | 1 | 1 | 18 |
| CPWG | 1 | 1 | 18 |
| CRQF | 1 | 1 | 18 |
| CRYW | 1 | 1 | 18 |
| CSIW | 1 | 1 | 18 |
| CTWN | 1 | 1 | 18 |
| CVWF | 1 | 1 | 18 |
| CYSK | 1 | 1 | 18 |
| CAWV | 1 | 1 | 19 |
| CHDM | 1 | 1 | 19 |
| CKPV | 1 | 1 | 19 |
| CKWA | 1 | 1 | 19 |
| CRNK | 1 | 1 | 19 |
| CWCT | 1 | 1 | 19 |
| CWWF | 1 | 1 | 19 |
| CAPM | 1 | 1 | 20 |
| CCSF | 1 | 1 | 20 |
| CDLW | 1 | 1 | 20 |
| CKQR | 1 | 1 | 20 |
| CVFQ | 1 | 1 | 20 |
| CWPY | 1 | 1 | 20 |
| CWRG | 1 | 1 | 20 |
| CYWL | 1 | 1 | 20 |
| CIYS | 1 | 1 | 21 |
| CLFW | 1 | 1 | 21 |
| CQPR | 1 | 1 | 21 |
| CRWI | 1 | 1 | 21 |
| CTYP | 1 | 1 | 21 |
| CWQY | 1 | 1 | 21 |
| CNRH | 1 | 1 | 22 |
| CQNK | 1 | 1 | 22 |
| CWHM | 1 | 1 | 22 |
| CYIN | 1 | 1 | 22 |
| CCAA | 1 | 1 | 23 |
| CETM | 1 | 1 | 23 |
| CGWP | 1 | 1 | 23 |
| CNRE | 1 | 1 | 23 |
| CYMH | 1 | 1 | 23 |
| CVFW | 1 | 1 | 24 |
| CAQT | 1 | 1 | 26 |
| CKFS | 1 | 1 | 26 |
| CPLH | 1 | 1 | 26 |



|      |   |   |    |
|------|---|---|----|
| CRYM | 1 | 1 | 26 |
| CVYA | 1 | 1 | 26 |
| CYHR | 1 | 1 | 26 |
| CLWH | 1 | 1 | 27 |
| CITY | 1 | 1 | 28 |
| CNQL | 1 | 1 | 30 |
| CLWM | 1 | 1 | 31 |
| CSPM | 1 | 1 | 39 |
| CQTM | 1 | 1 | 40 |
| CTLW | 1 | 1 | 47 |
