# Supplementary material for: Towards the Systematic Mapping and Engineering of the Protein Prenylation Machinery in Saccharomyces cerevisiae
Source: PubMed Central journal article supplement (PMC4358939; doi:10.1371/journal.pone.0120716), 2015-03-13
Supplement: pone.0120716.s004.pdf [file pone.0120716.s004.pdf]

### Distribution of CaaX-Box Motives in the Naïve and Three Independently Simulated Libraries

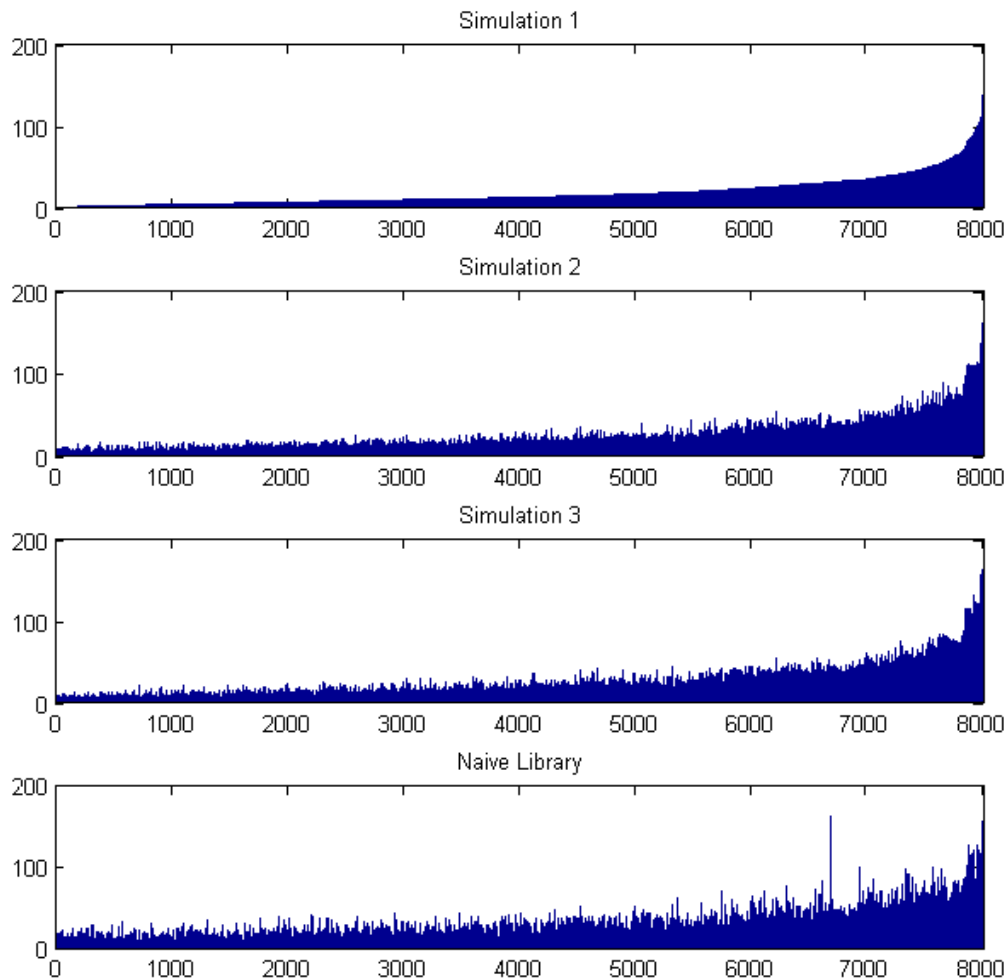

**Figure S1:** In the naïve library, the count of 8000 theoretically possible individual CaaX-box motifs ranges from 0 to 153 within a total of 168,627 of NGS counts. This relatively large spread in the occurrence of individual CaaX-box motifs in the naïve library primarily arises from the different codon frequencies encoded by the degenerate NNS codons as three independently simulated CaaX-box libraries yield distributions that are comparable to the naïve library. Here, on average, the normalized fold-deviation of different CaaX-box motifs in Simulation 1 compared to Simulation 2 and 3 differs by 9% while Simulation 1 compared to the naïve library (for CaaX-box motifs occurring more than twice) differs by 28%.
