# Supplementary material for: Towards the Systematic Mapping and Engineering of the Protein Prenylation Machinery in Saccharomyces cerevisiae
Source: PubMed Central journal article supplement (PMC4358939; doi:10.1371/journal.pone.0120716), 2015-03-13
Supplement: pone.0120716.s005.pdf [file pone.0120716.s005.pdf]

## Correlating Putative CAAX-box Motives with Endogenous Protein Functions

- Screening was performed in the context of the Hypervariable Region of H-Ras:

```

170           175           180           185
... K L N P P D E S G P G C M S C K C X X X

```

- Endogenous CaaX-box motives were identified with the pattern match tool (<http://www.yeastgenome.org/cgi-bin/PATMATCH/nph-patmatch>) at the Saccharomyces Genome Database using query 'CXXX'.

### High Confidence Set: Enrichments > 3

| Motif | Enrichment | 37 °C | 25 °C | Naïve | Gene ID | Protein Function                                                      |
|-------|------------|-------|-------|-------|---------|-----------------------------------------------------------------------|
| -CFIF | 3.1940     | 8     | 1     | 4     | YBR042C | Putative transferase involved in phospholipid biosynthesis            |
| -CVIM | 3.3714     | 152   | 18    | 19    | YBL061C | Activator of Chs3p (chitin synthase III) during vegetative growth     |
| -CAIM | 4.3303     | 141   | 13    | 13    | YML006C | CAAX box containing protein of unknown function                       |
| -CVVM | 5.1482     | 245   | 19    | 16    | YPL191C | Putative protein of unknown function                                  |
| -CIII | 5.3898     | 162   | 12    | 16    | YIR032C | Ureidoglycolate lyase                                                 |
| -CVIS | 5.6350     | 494   | 35    | 53    | YIR007W | Putative glycosidase                                                  |
| -CTIL | 6.2198     | 592   | 38    | 72    | YGR152C | GTP-binding protein of the Ras superfamily                            |
| -CSIM | 6.4349     | 274   | 17    | 20    | YCR027C | Putative Rheb-related GTPase                                          |
| -CCVC | 6.5523     | 279   | 17    | 19    | YFL066C | Helicase-like protein encoded within the telomeric Y' element         |
| -CTVA | 7.7758     | 409   | 21    | 36    | YML116W | Multidrug efflux pump of the major facilitator superfamily            |
| -CCIQ | 7.8138     | 137   | 7     | 15    | YLR090W | Chaperone with a role in facilitating mitochondrial protein import    |
| -CTIM | 8.1320     | 387   | 19    | 19    | YIL118W | Non-essential small GTPase of the Rho/Rac family of Ras-like proteins |
| -CVIL | 8.9122     | 692   | 31    | 51    | YNL180C | Non-essential small GTPase of the Rho/Rac family of Ras-like proteins |
| -CVIA | 10.123     | 355   | 14    | 40    | YDR461W | Mating pheromone a-factor                                             |
| -CIIL | 10.313     | 620   | 24    | 35    | YOL014W | Putative protein of unknown function                                  |
| -CIIM | 15.670     | 157   | 4     | 12    | YKR055W | Non-essential small GTPase                                            |
| -CAIL | 17.088     | 642   | 15    | 40    | YLR229C | Small rho-like GTPase                                                 |

### Ambiguous Set: Enrichments 1-3 + Low Occurrences at 37 °C and 25 °C

|       |        |   |   |    |           |                                                          |
|-------|--------|---|---|----|-----------|----------------------------------------------------------|
| -CCIM | 1.1977 | 3 | 1 | 9  | YJL204C   | F-box protein involved in recycling endocytosed proteins |
| -CIHH | 1.1977 | 3 | 1 | 16 | YOL164W-A | Putative protein of unknown function                     |

## Low Confidence Set: Enrichments < 1

|              |               |          |           |            |                |                                                                       |
|--------------|---------------|----------|-----------|------------|----------------|-----------------------------------------------------------------------|
| -CCLD        | 0.0240        | 1        | 16        | 40         | YBR087W        | Subunit of heteropentameric Replication factor C (RF-C)               |
| -CQRK        | 0.0240        | 1        | 16        | 22         | YOR034C-A      | Putative protein of unknown function                                  |
| -CRNR        | 0.0240        | 1        | 16        | 42         | YML041C        | Nucleosome-binding component of the SWR1 complex                      |
| -CALD        | 0.0285        | 1        | 14        | 36         | YJL062W        | Integral plasma membrane protein                                      |
| -CTDS        | 0.0319        | 2        | 25        | 43         | YOR257W        | Calcium-binding component of the spindle pole body (SPB) half-bridge  |
| -CIKS        | 0.0347        | 2        | 23        | 39         | YML075C        | HMG-CoA reductase                                                     |
| -CTRK        | 0.0363        | 1        | 11        | 39         | YDR528W        | Protein involved in regulation of cell wall composition and integrity |
| -CLAK        | 0.0399        | 2        | 20        | 34         | YDR307W        | Putative protein mannosyltransferase similar to Pmt1p                 |
| -CSNA        | 0.0399        | 1        | 10        | 32         | YMR265C        | Putative protein of unknown function                                  |
| -CSGL        | 0.0413        | 3        | 29        | 77         | YJR107W        | Putative lipase                                                       |
| -CRVK        | 0.0499        | 2        | 16        | 33         | YMR158W        | Mitochondrial ribosomal protein of the small subunit                  |
| -CRME        | 0.0570        | 1        | 7         | 11         | YJL059W        | Protein required for the ATP-dependent transport of arginine          |
| -CCPS        | 0.0614        | 2        | 13        | 23         | YFL065C        | Putative protein of unknown function                                  |
| -CKQS        | 0.0665        | 1        | 6         | 8          | YKR048C        | Histone chaperone                                                     |
| -CVKK        | 0.0665        | 2        | 12        | 33         | YDR257C        | Ribosomal lysine methyltransferase                                    |
| -CVKM        | 0.0665        | 1        | 6         | 17         | YBR150C        | Putative protein of unknown function                                  |
| -CDDD        | 0.0798        | 1        | 5         | 8          | YGR068C        | Protein proposed to regulate endocytosis of plasma membrane proteins  |
| -CWKD        | 0.0798        | 2        | 10        | 15         | YOR231W        | MAPKK involved in the protein kinase C signaling pathway              |
| -CYNA        | 0.0798        | 1        | 5         | 19         | YCR020C        | Protein of unknown function                                           |
| -CNAG        | 0.0887        | 2        | 9         | 18         | YKL176C        | Protein possibly involved in a post-Golgi secretory pathway           |
| -CASL        | 0.0939        | 8        | 34        | 74         | YDR261C        | "Exo-1,3-beta-glucanase"                                              |
| -CCCS        | 0.0998        | 2        | 8         | 24         | YJL118W        | Putative protein of unknown function                                  |
| -CDFS        | 0.0998        | 3        | 12        | 32         | YGR282C        | "Endo-beta-1,3-glucanase"                                             |
| -CHHD        | 0.0998        | 1        | 4         | 11         | YDL186W        | Putative protein of unknown function                                  |
| -CPNY        | 0.0998        | 1        | 4         | 13         | YPL109C        | Putative protein of unknown function                                  |
| -CVFK        | 0.0998        | 1        | 4         | 27         | YKL069W        | Methionine-R-sulfoxide reductase                                      |
| -CYDA        | 0.0998        | 2        | 8         | 13         | YOR299W        | Member of the ChAPs family (Chs5p-Arflp-binding proteins)             |
| -CDPN        | 0.1140        | 2        | 7         | 28         | YNL106C        | Polyphosphatidylinositol phosphatase                                  |
| -CQ GK       | 0.1140        | 2        | 7         | 17         | YDR301W        | RNA-binding subunit of the mRNA cleavage and polyadenylation factor   |
| <b>-CVLL</b> | <b>0.1159</b> | <b>9</b> | <b>31</b> | <b>128</b> | <b>YPR165W</b> | <b>GTP-binding protein of the rho subfamily of Ras-like proteins</b>  |
| -CHDE        | 0.1331        | 1        | 3         | 8          | YPR093C        | Ubiquitin ligase that modifies and regulates RNA Pol II               |
| -CPKA        | 0.1331        | 1        | 3         | 17         | YNL255C        | Translational activator for mRNAs with internal ribosome entry sites  |
| -CSEI        | 0.1497        | 6        | 16        | 16         | YBR096W        | Putative protein of unknown function                                  |
| -CAPY        | 0.1996        | 1        | 2         | 15         | YIL134C-A      | Putative protein of unknown function                                  |
| -CIGK        | 0.1996        | 1        | 2         | 9          | YMR023C        | Mitochondrial protein                                                 |
| -CIQF        | 0.1996        | 1        | 2         | 13         | YGL169W        | Protein involved in threonylcarbamoyl adenosine biosynthesis          |
| -CKCI        | 0.1996        | 1        | 2         | 6          | YBL018C        | Subunit of both RNase MRP and nuclear RNase P                         |
| -CNDV        | 0.1996        | 1        | 2         | 18         | YGL263W        | Protein of unknown function                                           |
| -CIDL        | 0.2541        | 7        | 11        | 36         | YOR242C        | Sporulation specific protein that localizes to the spore wall         |
| -CDDY        | 0.2662        | 2        | 3         | 11         | YGL045W        | Protein involved in proteolytic activation of Rim101p                 |
| -CKGE        | 0.2662        | 2        | 3         | 5          | YMR187C        | Putative protein of unknown function                                  |
| -CASQ        | 0.3992        | 3        | 3         | 37         | YNL064C        | Type I HSP40 co-chaperone                                             |
| -CMYV        | 0.7186        | 9        | 5         | 25         | YMR272W-B      | Protein of unknown function                                           |

**Unconfirmed Motives:****Neither Observed in the 37 °C or 25 °C Library Sets → Lack of Transformants?**

|       |        |   |   |    |         |                                                                  |
|-------|--------|---|---|----|---------|------------------------------------------------------------------|
| -CADY | 0.3992 | 1 | 1 | 11 | YMR300C | Phosphoribosylpyrophosphate amidotransferase (PRPPAT)            |
| -CKCT | 0.3993 | 1 | 1 | 9  | YBL049W | Protein of unknown function                                      |
| -CKQQ | 0.3993 | 1 | 1 | 8  | YDL065C | Chaperone and import receptor for newly-synthesized class I PMPs |
| -CKYI | 0.3993 | 1 | 1 | 3  | YMR060C | Component of the Sorting and Assembly Machinery (SAM) complex    |
| -CPFW | 0.3993 | 1 | 1 | 12 | YJR066W | PIK-related protein kinase and rapamycin target                  |
