# Supplementary material for: Towards the Systematic Mapping and Engineering of the Protein Prenylation Machinery in Saccharomyces cerevisiae
Source: PubMed Central journal article supplement (PMC4358939; doi:10.1371/journal.pone.0120716), 2015-03-13
Supplement: pone.0120716.s006.pdf [file pone.0120716.s006.pdf]

## 1. Enrichment Factors of Sequencing Motives Ending with -LL

| Motif        | Enrichment     | Counts   |           |            |
|--------------|----------------|----------|-----------|------------|
|              |                | 37 °C    | 25 °C     | Naive      |
| -CPLL        | 0.02218        | 2        | 36        | 83         |
| -CKLL        | 0.027534       | 2        | 29        | 65         |
| -CQLL        | 0.057035       | 2        | 14        | 36         |
| -CTLL        | 0.061422       | 2        | 13        | 102        |
| -CDLL        | 0.074278       | 8        | 43        | 101        |
| -CSLL        | 0.075533       | 7        | 37        | 150        |
| -CFLL        | 0.099811       | 2        | 8         | 64         |
| -CGLL        | 0.099811       | 8        | 32        | 71         |
| <b>-CVLL</b> | <b>0.11591</b> | <b>9</b> | <b>31</b> | <b>128</b> |
| -CNLL        | 0.12284        | 4        | 13        | 53         |
| -CALL        | 0.15526        | 7        | 18        | 103        |
| -CLLL        | 0.19012        | 10       | 21        | 144        |
| -CWLL        | 0.23955        | 3        | 5         | 39         |
| -CELL        | 0.24398        | 11       | 18        | 53         |
| -CRLL        | 0.29036        | 16       | 22        | 130        |
| -CHLL        | 0.29418        | 14       | 19        | 60         |
| -CMLL        | 0.29943        | 3        | 4         | 36         |
| -CYLL        | 0.29943        | 12       | 16        | 68         |
| -CCLL        | 0.3194         | 4        | 5         | 41         |
| -CILL        | 0.3194         | 4        | 5         | 45         |

**Note:** -CVLL of Rho1p is highlighted in yellow

## 2. Enrichment Factors of Sequencing Motives Ending with -VL

| Motif | Enrichment | Counts |       |       |
|-------|------------|--------|-------|-------|
|       |            | 37 °C  | 25 °C | Naive |
| -CGVL | 0.03327    | 3      | 36    | 71    |
| -CEVL | 0.063879   | 4      | 25    | 58    |
| -CRVL | 0.063879   | 4      | 25    | 95    |
| -CQVL | 0.10506    | 5      | 19    | 39    |
| -CMVL | 0.11407    | 2      | 7     | 29    |
| -CSVL | 0.13688    | 12     | 35    | 93    |
| -CYVL | 0.14518    | 4      | 11    | 56    |
| -CLVL | 0.14639    | 11     | 30    | 93    |
| -CKVL | 0.14972    | 3      | 8     | 36    |
| -CDVL | 0.1597     | 8      | 20    | 40    |
| -CFVL | 0.1597     | 2      | 5     | 40    |
| -CPVL | 0.19962    | 12     | 24    | 57    |
| -CHVL | 0.28182    | 12     | 17    | 86    |
| -CWVL | 0.39925    | 2      | 2     | 18    |
| -CAVL | 0.41826    | 22     | 21    | 59    |
| -CCVL | 0.58351    | 19     | 13    | 38    |
| <br>  |            |        |       |       |
| -CNVL | 1.0188     | 74     | 29    | 51    |
| <br>  |            |        |       |       |
| -CIVL | 3.3366     | 234    | 28    | 57    |
| -CVVL | 5.2953     | 504    | 38    | 98    |
| -CTVL | 5.4896     | 550    | 40    | 110   |

### 3. Enrichment Factors of Sequencing Motives Ending with -IL

| Motif        | Enrichment     | Counts     |           |           |
|--------------|----------------|------------|-----------|-----------|
|              |                | 37 °C      | 25 °C     | Naive     |
| -CWIL        | 0.26616        | 2          | 3         | 15        |
| -CKIL        | 0.34221        | 6          | 7         | 25        |
| -CGIL        | 0.35488        | 8          | 9         | 26        |
| -CRIL        | 0.6341         | 27         | 17        | 51        |
| -CDIL        | 1.9004         | 119        | 25        | 28        |
| -CFIL        | 1.9962         | 5          | 1         | 14        |
| -CYIL        | 2.3755         | 119        | 20        | 31        |
| -CNIL        | 4.9011         | 356        | 29        | 18        |
| -CEIL        | 5.0305         | 315        | 25        | 23        |
| <b>-CTIL</b> | <b>6.2198</b>  | <b>592</b> | <b>38</b> | <b>72</b> |
| -CQIL        | 7.7454         | 194        | 10        | 26        |
| -CCIL        | 8.6237         | 324        | 15        | 22        |
| -CVIL        | 8.9122         | 692        | 31        | 51        |
| -CPIL        | 9.0914         | 797        | 35        | 45        |
| -CMIL        | 9.2326         | 185        | 8         | 26        |
| -CSIL        | 10.0118        | 1304       | 52        | 64        |
| <b>-CIIL</b> | <b>10.3138</b> | <b>620</b> | <b>24</b> | <b>35</b> |
| -CHIL        | 11.1789        | 84         | 3         | 21        |
| -CAIL        | 17.0877        | 642        | 15        | 40        |
| -CLIL        | 17.7034        | 1685       | 38        | 66        |

**Note:** -CTIL of Cdc42p and -CIIL of Ras2p are highlighted in yellow
