# Supplementary material for: Towards the Systematic Mapping and Engineering of the Protein Prenylation Machinery in Saccharomyces cerevisiae
Source: PubMed Central journal article supplement (PMC4358939; doi:10.1371/journal.pone.0120716), 2015-03-13
Supplement: pone.0120716.s007.pdf [file pone.0120716.s007.pdf]

## 1. Enrichment Factors of GGTase II Compatible CAAX-box Motives: -CCXC Pattern

| Motif | Enrichment | Counts |       |       |
|-------|------------|--------|-------|-------|
|       |            | 37 °C  | 25 °C | Naive |
| -CCGC | 0.099811   | 1      | 4     | 22    |
| -CCQC | 0.099811   | 1      | 4     | 21    |
| -CCSC | 0.099811   | 1      | 4     | 6     |
| -CCEC | 0.1597     | 2      | 5     | 15    |
| -CCRC | 0.1597     | 2      | 5     | 16    |
| -CCFC | 0.19962    | 3      | 6     | 14    |
| -CCTC | 0.19962    | 1      | 2     | 10    |
| -CCWC | 0.19962    | 1      | 2     | 6     |
| -CCYC | 0.19962    | 1      | 2     | 8     |
| -CCNC | 0.26616    | 2      | 3     | 12    |
| -CCAC | 0.39925    | 1      | 1     | 9     |
| -CCDC | 0.39925    | 1      | 1     | 5     |
| -CCKC | 0.39925    | 1      | 1     | 8     |
| -CCCC | 0.79849    | 2      | 1     | 6     |
| -CCHC | 0.79849    | 2      | 1     | 5     |
| -CCPC | 0.79849    | 2      | 1     | 9     |
| -CCVC | 6.5523     | 279    | 17    | 19    |
| -CCLC | 9.4868     | 499    | 21    | 34    |
| -CCIC | 14.4726    | 145    | 4     | 14    |
| -CCMC | 14.6922    | 368    | 10    | 5     |

## 2. Enrichment Factors of GGTase II Compatible CAAX-box Motives: -CXCC Pattern

| Motif | Enrichment | Counts |       |       |
|-------|------------|--------|-------|-------|
|       |            | 37 °C  | 25 °C | Naive |
| -CFCC | 0.19962    | 1      | 2     | 3     |
| -CKCC | 0.19962    | 1      | 2     | 18    |
| -CECC | 0.26616    | 2      | 3     | 20    |
| -CACC | 0.34221    | 6      | 7     | 9     |
| -CDCC | 0.39925    | 1      | 1     | 6     |
| -CHCC | 0.39925    | 1      | 1     | 6     |
| -CMCC | 0.39925    | 1      | 1     | 2     |
| -CNCC | 0.39925    | 1      | 1     | 5     |
| -CPCC | 0.39925    | 1      | 1     | 11    |
| -CQCC | 0.39925    | 1      | 1     | 8     |
| -CWCC | 0.39925    | 1      | 1     | 5     |
| -CYCC | 0.39925    | 2      | 2     | 8     |
| -CGCC | 0.59887    | 3      | 2     | 10    |
| -CCCC | 0.79849    | 2      | 1     | 6     |
| -CRCC | 0.79849    | 2      | 1     | 10    |
| -CSCC | 0.79849    | 4      | 2     | 19    |
| -CTCC | 1.4639     | 11     | 3     | 14    |
| -CICC | 1.9962     | 5      | 1     | 7     |
| -CVCC | 11.2787    | 113    | 4     | 4     |
| -CLCC | 13.8671    | 521    | 15    | 11    |
