# Supplementary material for: Towards the Systematic Mapping and Engineering of the Protein Prenylation Machinery in Saccharomyces cerevisiae
Source: PubMed Central journal article supplement (PMC4358939; doi:10.1371/journal.pone.0120716), 2015-03-13
Supplement: pone.0120716.s008.pdf [file pone.0120716.s008.pdf]

## 1. Enrichment Factors of Sequencing Motives Ending with –CXID/E

| Motif | Enrichment | Counts |       |       |
|-------|------------|--------|-------|-------|
|       |            | 37 °C  | 25 °C | Naive |
| -CSIE | 0.019962   | 1      | 20    | 33    |
| -CNIE | 0.03327    | 1      | 12    | 8     |
| -CHIE | 0.044361   | 1      | 9     | 10    |
| -CFID | 0.057035   | 1      | 7     | 10    |
| -CPIE | 0.057035   | 1      | 7     | 20    |
| -CGIE | 0.061422   | 2      | 13    | 30    |
| -CHID | 0.066541   | 1      | 6     | 14    |
| -CQIE | 0.066541   | 1      | 6     | 12    |
| -CMIE | 0.079849   | 2      | 10    | 10    |
| -CEIE | 0.088721   | 2      | 9     | 9     |
| -CDIE | 0.099811   | 1      | 4     | 13    |
| -CGID | 0.099811   | 1      | 4     | 9     |
| -CKIE | 0.099811   | 1      | 4     | 4     |
| -CNID | 0.099811   | 2      | 8     | 16    |
| -CPID | 0.099811   | 1      | 4     | 7     |
| -CSID | 0.099811   | 2      | 8     | 30    |
| -CYIE | 0.099811   | 1      | 4     | 8     |
| -CDID | 0.13308    | 1      | 3     | 7     |
| -CLID | 0.13308    | 1      | 3     | 12    |
| -CQID | 0.13308    | 1      | 3     | 11    |
| -CWID | 0.13308    | 1      | 3     | 5     |
| -CCID | 0.14972    | 3      | 8     | 13    |
| -CAIE | 0.17744    | 4      | 9     | 20    |
| -CRID | 0.19962    | 1      | 2     | 18    |
| -CRIE | 0.19962    | 2      | 4     | 22    |
| -CAID | 0.29943    | 3      | 4     | 16    |
| -CCIE | 0.34221    | 6      | 7     | 14    |
| -CEID | 0.39925    | 1      | 1     | 5     |
| -CFIE | 0.39925    | 1      | 1     | 11    |
| -CLIE | 0.39925    | 2      | 2     | 5     |
| -CWIE | 0.39925    | 1      | 1     | 9     |
| -CYID | 0.39925    | 1      | 1     | 10    |
| -CKID | 0.59887    | 3      | 2     | 6     |
| -CTID | 0.62739    | 11     | 7     | 10    |
| -CMID | 1.1977     | 3      | 1     | 13    |
| -CIIE | 1.4639     | 11     | 3     | 5     |
| -CTIE | 2.8945     | 58     | 8     | 16    |
| -CIID | 5.0904     | 51     | 4     | 18    |
| -CVIE | 5.6054     | 351    | 25    | 41    |
| -CVID | 15.0116    | 376    | 10    | 18    |

**Note:**  $\beta$ -branched in A1 are highlighted in yellow

## 2. Enrichment Factors of Sequencing Motives Ending with –CXXD/E

| Motif  | Enrichment | Counts |       |       |
|--------|------------|--------|-------|-------|
|        |            | 37 °C  | 25 °C | Naive |
| -CLTE  | 0.012879   | 1      | 31    | 46    |
| -CVRE  | 0.015356   | 1      | 26    | 26    |
| -CYED  | 0.017359   | 1      | 23    | 16    |
| -CSR D | 0.019012   | 1      | 21    | 34    |
| -CLSE  | 0.019475   | 2      | 41    | 50    |
| -CSIE  | 0.019962   | 1      | 20    | 33    |
| -CCTE  | 0.021013   | 1      | 19    | 29    |
| -CEVD  | 0.02218    | 1      | 18    | 6     |
| -CSNE  | 0.02218    | 1      | 18    | 15    |
| -CSTE  | 0.02218    | 1      | 18    | 23    |
| -CSVD  | 0.023061   | 16     | 277   | 162   |
| -CISD  | 0.023485   | 1      | 17    | 28    |
| -CCLD  | 0.024953   | 1      | 16    | 40    |
| -CKTE  | 0.024953   | 1      | 16    | 20    |
| -CVQE  | 0.024953   | 1      | 16    | 15    |
| -CVSE  | 0.025758   | 2      | 31    | 48    |
| -CEFD  | 0.026616   | 1      | 15    | 11    |
| -CFPE  | 0.026616   | 1      | 15    | 12    |
| -CALD  | 0.028518   | 1      | 14    | 36    |
| -CAME  | 0.028518   | 1      | 14    | 18    |
| -CDEE  | 0.028518   | 1      | 14    | 5     |
| -CDLD  | 0.028518   | 1      | 14    | 18    |
| -CNSD  | 0.028518   | 1      | 14    | 22    |
| -CPDE  | 0.028518   | 1      | 14    | 16    |
| -CPNE  | 0.028518   | 1      | 14    | 16    |
| -CPRE  | 0.028518   | 1      | 14    | 36    |
| -CTRE  | 0.028518   | 1      | 14    | 31    |
| -CVTD  | 0.028518   | 1      | 14    | 22    |
| -CDGE  | 0.030711   | 1      | 13    | 15    |
| -CELE  | 0.030711   | 1      | 13    | 22    |
| -CESE  | 0.030711   | 1      | 13    | 20    |
| -CFQE  | 0.030711   | 1      | 13    | 14    |
| -CGTE  | 0.030711   | 1      | 13    | 16    |
| -CHSE  | 0.030711   | 1      | 13    | 25    |
| -CKLE  | 0.030711   | 1      | 13    | 23    |
| -CLTD  | 0.030711   | 1      | 13    | 42    |
| -CYEE  | 0.030711   | 1      | 13    | 14    |
| -CANE  | 0.03327    | 1      | 12    | 12    |
| -CGGE  | 0.03327    | 1      | 12    | 8     |
| -CGMD  | 0.03327    | 1      | 12    | 15    |
| -CIGE  | 0.03327    | 1      | 12    | 11    |
| -CKDE  | 0.03327    | 1      | 12    | 21    |
| -CKLD  | 0.03327    | 1      | 12    | 25    |
| -CLNE  | 0.03327    | 1      | 12    | 23    |
| -CNIE  | 0.03327    | 1      | 12    | 8     |
| -CNTE  | 0.03327    | 1      | 12    | 30    |
| -CPKE  | 0.03327    | 1      | 12    | 21    |
| -CRAE  | 0.03327    | 1      | 12    | 28    |
| -CRND  | 0.03327    | 1      | 12    | 15    |
| -CRNE  | 0.03327    | 1      | 12    | 39    |
| -CPSE  | 0.034717   | 2      | 23    | 38    |

|       |          |   |    |    |
|-------|----------|---|----|----|
| -CPTE | 0.034717 | 2 | 23 | 21 |
| -CAPE | 0.036295 | 1 | 11 | 17 |
| -CARE | 0.036295 | 1 | 11 | 20 |
| -CCDE | 0.036295 | 1 | 11 | 12 |
| -CDSE | 0.036295 | 1 | 11 | 18 |
| -CERD | 0.036295 | 1 | 11 | 22 |
| -CEYE | 0.036295 | 1 | 11 | 12 |
| -CGFD | 0.036295 | 1 | 11 | 19 |
| -CGGD | 0.036295 | 1 | 11 | 11 |
| -CNDE | 0.036295 | 1 | 11 | 19 |
| -CNTD | 0.036295 | 2 | 22 | 15 |
| -CPLD | 0.036295 | 1 | 11 | 24 |
| -CRCE | 0.036295 | 1 | 11 | 24 |
| -CRYD | 0.036295 | 1 | 11 | 39 |
| -CTGE | 0.036295 | 1 | 11 | 18 |
| -CTSD | 0.036295 | 2 | 22 | 32 |
| -CVAD | 0.036295 | 1 | 11 | 22 |
| -CGLD | 0.038023 | 2 | 21 | 43 |
| -CASE | 0.039925 | 1 | 10 | 29 |
| -CCGE | 0.039925 | 1 | 10 | 23 |
| -CDME | 0.039925 | 2 | 20 | 17 |
| -CGVD | 0.039925 | 1 | 10 | 21 |
| -CHGD | 0.039925 | 1 | 10 | 9  |
| -CHTE | 0.039925 | 1 | 10 | 20 |
| -CLFD | 0.039925 | 1 | 10 | 22 |
| -CLKD | 0.039925 | 1 | 10 | 12 |
| -CMSE | 0.039925 | 2 | 20 | 34 |
| -CMTE | 0.039925 | 1 | 10 | 20 |
| -CPHE | 0.039925 | 1 | 10 | 16 |
| -CSEE | 0.039925 | 1 | 10 | 15 |
| -CSKD | 0.039925 | 2 | 20 | 18 |
| -CTGD | 0.039925 | 1 | 10 | 6  |
| -CYLE | 0.039925 | 1 | 10 | 29 |
| -CYRE | 0.039925 | 1 | 10 | 25 |
| -CQTE | 0.041301 | 3 | 29 | 17 |
| -CESD | 0.042026 | 2 | 19 | 21 |
| -CGEE | 0.042026 | 2 | 19 | 13 |
| -CGLE | 0.042026 | 2 | 19 | 43 |
| -CLAE | 0.042026 | 2 | 19 | 19 |
| -CRTE | 0.042026 | 2 | 19 | 25 |
| -CSGE | 0.042026 | 2 | 19 | 41 |
| -CVRD | 0.042026 | 2 | 19 | 30 |
| -CAFD | 0.044361 | 1 | 9  | 23 |
| -CALE | 0.044361 | 1 | 9  | 29 |
| -CDCD | 0.044361 | 2 | 18 | 8  |
| -CDDE | 0.044361 | 1 | 9  | 14 |
| -CGND | 0.044361 | 1 | 9  | 11 |
| -CHIE | 0.044361 | 1 | 9  | 10 |
| -CHRE | 0.044361 | 1 | 9  | 29 |
| -CIHD | 0.044361 | 1 | 9  | 20 |
| -CITE | 0.044361 | 2 | 18 | 11 |
| -CLGD | 0.044361 | 1 | 9  | 20 |
| -CLPE | 0.044361 | 2 | 18 | 32 |
| -CNRD | 0.044361 | 2 | 18 | 19 |
| -CSLD | 0.044361 | 2 | 18 | 47 |
| -CTED | 0.044361 | 2 | 18 | 29 |
| -CTTD | 0.044361 | 1 | 9  | 12 |

|        |          |   |    |    |
|--------|----------|---|----|----|
| -CVVEE | 0.044361 | 1 | 9  | 16 |
| -CRRD  | 0.044361 | 3 | 27 | 46 |
| -CGSE  | 0.04697  | 2 | 17 | 24 |
| -CLFE  | 0.04697  | 2 | 17 | 31 |
| -CRFE  | 0.04697  | 2 | 17 | 35 |
| -CDNE  | 0.049906 | 1 | 8  | 16 |
| -CDRE  | 0.049906 | 1 | 8  | 18 |
| -CDTE  | 0.049906 | 1 | 8  | 12 |
| -CECE  | 0.049906 | 1 | 8  | 15 |
| -CEGD  | 0.049906 | 2 | 16 | 3  |
| -CEHE  | 0.049906 | 1 | 8  | 13 |
| -CERE  | 0.049906 | 1 | 8  | 22 |
| -CFND  | 0.049906 | 1 | 8  | 11 |
| -CGPD  | 0.049906 | 1 | 8  | 12 |
| -CHCD  | 0.049906 | 1 | 8  | 11 |
| -CHED  | 0.049906 | 1 | 8  | 3  |
| -CIPD  | 0.049906 | 1 | 8  | 10 |
| -CKCD  | 0.049906 | 1 | 8  | 18 |
| -CKEE  | 0.049906 | 1 | 8  | 5  |
| -CKMD  | 0.049906 | 1 | 8  | 10 |
| -CKNE  | 0.049906 | 1 | 8  | 20 |
| -CLCE  | 0.049906 | 1 | 8  | 21 |
| -CLEE  | 0.049906 | 2 | 16 | 23 |
| -CLQD  | 0.049906 | 2 | 16 | 19 |
| -CMSD  | 0.049906 | 1 | 8  | 14 |
| -CNVD  | 0.049906 | 1 | 8  | 16 |
| -CNYE  | 0.049906 | 1 | 8  | 25 |
| -CPLE  | 0.049906 | 3 | 24 | 38 |
| -CQSD  | 0.049906 | 1 | 8  | 18 |
| -CQVE  | 0.049906 | 1 | 8  | 11 |
| -CRKE  | 0.049906 | 1 | 8  | 24 |
| -CSDE  | 0.049906 | 3 | 24 | 25 |
| -CVAE  | 0.049906 | 2 | 16 | 30 |
| -CVND  | 0.049906 | 1 | 8  | 12 |
| -CWSE  | 0.049906 | 1 | 8  | 18 |
| -CYTD  | 0.049906 | 1 | 8  | 12 |
| -CHEE  | 0.053233 | 2 | 15 | 13 |
| -CLLD  | 0.053233 | 2 | 15 | 50 |
| -CSPD  | 0.053233 | 2 | 15 | 26 |
| -CVGE  | 0.053233 | 2 | 15 | 21 |
| -CTSE  | 0.054443 | 3 | 22 | 49 |
| -CECD  | 0.057035 | 1 | 7  | 9  |
| -CEKE  | 0.057035 | 1 | 7  | 7  |
| -CFCE  | 0.057035 | 1 | 7  | 8  |
| -CFID  | 0.057035 | 1 | 7  | 10 |
| -CGYE  | 0.057035 | 1 | 7  | 16 |
| -CHAE  | 0.057035 | 1 | 7  | 12 |
| -CHSD  | 0.057035 | 1 | 7  | 22 |
| -CKPE  | 0.057035 | 1 | 7  | 6  |
| -CNLE  | 0.057035 | 1 | 7  | 9  |
| -CPIE  | 0.057035 | 1 | 7  | 20 |
| -CPKD  | 0.057035 | 1 | 7  | 25 |
| -CPVE  | 0.057035 | 1 | 7  | 13 |
| -CQGD  | 0.057035 | 1 | 7  | 9  |
| -CRGD  | 0.057035 | 2 | 14 | 12 |
| -CRGE  | 0.057035 | 1 | 7  | 22 |
| -CRME  | 0.057035 | 1 | 7  | 11 |

|       |          |   |    |    |
|-------|----------|---|----|----|
| -CRQD | 0.057035 | 1 | 7  | 13 |
| -CRQE | 0.057035 | 1 | 7  | 12 |
| -CRYE | 0.057035 | 1 | 7  | 14 |
| -CSAD | 0.057035 | 2 | 14 | 30 |
| -CSDD | 0.057035 | 2 | 14 | 13 |
| -CSGD | 0.057035 | 2 | 14 | 28 |
| -CSHD | 0.057035 | 1 | 7  | 16 |
| -CSME | 0.057035 | 1 | 7  | 24 |
| -CELD | 0.057035 | 3 | 21 | 31 |
| -CGIE | 0.061422 | 2 | 13 | 30 |
| -CGQE | 0.061422 | 2 | 13 | 13 |
| -CPFD | 0.061422 | 2 | 13 | 7  |
| -CPRD | 0.061422 | 2 | 13 | 23 |
| -CTCD | 0.061422 | 2 | 13 | 14 |
| -CTFE | 0.061422 | 4 | 26 | 27 |
| -CEYD | 0.063039 | 3 | 19 | 10 |
| -CLHE | 0.063039 | 3 | 19 | 39 |
| -CAAE | 0.066541 | 1 | 6  | 19 |
| -CADE | 0.066541 | 1 | 6  | 21 |
| -CAVD | 0.066541 | 1 | 6  | 29 |
| -CCAD | 0.066541 | 1 | 6  | 15 |
| -CCED | 0.066541 | 2 | 12 | 8  |
| -CDAE | 0.066541 | 1 | 6  | 7  |
| -CDFD | 0.066541 | 1 | 6  | 12 |
| -CEED | 0.066541 | 1 | 6  | 10 |
| -CEVE | 0.066541 | 1 | 6  | 16 |
| -CFCD | 0.066541 | 1 | 6  | 14 |
| -CFSE | 0.066541 | 2 | 12 | 19 |
| -CGKD | 0.066541 | 1 | 6  | 9  |
| -CGRE | 0.066541 | 1 | 6  | 14 |
| -CHID | 0.066541 | 1 | 6  | 14 |
| -CHLE | 0.066541 | 1 | 6  | 22 |
| -CHTD | 0.066541 | 2 | 12 | 27 |
| -CIEE | 0.066541 | 1 | 6  | 11 |
| -CIQE | 0.066541 | 1 | 6  | 13 |
| -CIRE | 0.066541 | 1 | 6  | 14 |
| -CKAD | 0.066541 | 1 | 6  | 7  |
| -CKKD | 0.066541 | 1 | 6  | 7  |
| -CKQD | 0.066541 | 2 | 12 | 14 |
| -CKQE | 0.066541 | 1 | 6  | 13 |
| -CKVE | 0.066541 | 1 | 6  | 18 |
| -CLDD | 0.066541 | 1 | 6  | 20 |
| -CLQE | 0.066541 | 1 | 6  | 4  |
| -CLRE | 0.066541 | 2 | 12 | 30 |
| -CLYD | 0.066541 | 1 | 6  | 31 |
| -CMLD | 0.066541 | 1 | 6  | 33 |
| -CMPD | 0.066541 | 1 | 6  | 9  |
| -CNEE | 0.066541 | 1 | 6  | 10 |
| -CNHD | 0.066541 | 1 | 6  | 10 |
| -CNHE | 0.066541 | 2 | 12 | 18 |
| -CNKD | 0.066541 | 1 | 6  | 8  |
| -CNND | 0.066541 | 1 | 6  | 8  |
| -CPFE | 0.066541 | 1 | 6  | 17 |
| -CQIE | 0.066541 | 1 | 6  | 12 |
| -CQLD | 0.066541 | 1 | 6  | 12 |
| -CQNE | 0.066541 | 1 | 6  | 10 |
| -CRDE | 0.066541 | 1 | 6  | 22 |

|       |          |   |    |    |
|-------|----------|---|----|----|
| -CSFE | 0.066541 | 1 | 6  | 8  |
| -CTHD | 0.066541 | 1 | 6  | 17 |
| -CTPE | 0.066541 | 2 | 12 | 34 |
| -CTRD | 0.066541 | 2 | 12 | 24 |
| -CVSD | 0.066541 | 1 | 6  | 19 |
| -CVTE | 0.066541 | 2 | 12 | 46 |
| -CVYD | 0.066541 | 1 | 6  | 15 |
| -CWNE | 0.066541 | 1 | 6  | 9  |
| -CWSD | 0.066541 | 1 | 6  | 9  |
| -CYKE | 0.066541 | 1 | 6  | 3  |
| -CYLD | 0.066541 | 1 | 6  | 29 |
| -CGSD | 0.066541 | 3 | 18 | 29 |
| -CTLD | 0.066541 | 3 | 18 | 45 |
| -CYPD | 0.066541 | 3 | 18 | 32 |
| -CSMD | 0.070455 | 3 | 17 | 25 |
| -CASD | 0.07259  | 2 | 11 | 26 |
| -CCHE | 0.07259  | 2 | 11 | 4  |
| -CLEd | 0.07259  | 2 | 11 | 16 |
| -CLGE | 0.07259  | 2 | 11 | 30 |
| -CMTD | 0.07259  | 2 | 11 | 24 |
| -CMVE | 0.07259  | 2 | 11 | 14 |
| -CTQE | 0.07259  | 2 | 11 | 9  |
| -CVDE | 0.07259  | 2 | 11 | 17 |
| -CLLE | 0.074859 | 3 | 16 | 39 |
| -CTTE | 0.076047 | 4 | 21 | 47 |
| -CAEE | 0.079849 | 2 | 10 | 18 |
| -CAFE | 0.079849 | 1 | 5  | 15 |
| -CAMD | 0.079849 | 1 | 5  | 10 |
| -CCYE | 0.079849 | 1 | 5  | 3  |
| -CDDD | 0.079849 | 1 | 5  | 8  |
| -CDHD | 0.079849 | 1 | 5  | 9  |
| -CDWE | 0.079849 | 1 | 5  | 7  |
| -CDYE | 0.079849 | 1 | 5  | 14 |
| -CEAD | 0.079849 | 1 | 5  | 11 |
| -CETD | 0.079849 | 3 | 15 | 25 |
| -CFAE | 0.079849 | 1 | 5  | 12 |
| -CFGD | 0.079849 | 1 | 5  | 11 |
| -CFGE | 0.079849 | 1 | 5  | 3  |
| -CGAE | 0.079849 | 1 | 5  | 11 |
| -CHGE | 0.079849 | 1 | 5  | 6  |
| -CHMD | 0.079849 | 1 | 5  | 8  |
| -CIAE | 0.079849 | 1 | 5  | 18 |
| -CIKE | 0.079849 | 1 | 5  | 8  |
| -CITD | 0.079849 | 1 | 5  | 10 |
| -CIYE | 0.079849 | 2 | 10 | 7  |
| -CKME | 0.079849 | 1 | 5  | 7  |
| -CKSD | 0.079849 | 1 | 5  | 25 |
| -CKYD | 0.079849 | 1 | 5  | 7  |
| -CLHD | 0.079849 | 1 | 5  | 20 |
| -CLVE | 0.079849 | 3 | 15 | 38 |
| -CMDD | 0.079849 | 2 | 10 | 10 |
| -CMFE | 0.079849 | 1 | 5  | 12 |
| -CMIE | 0.079849 | 2 | 10 | 10 |
| -CMMD | 0.079849 | 2 | 10 | 22 |
| -CMRE | 0.079849 | 1 | 5  | 18 |
| -CNAE | 0.079849 | 1 | 5  | 10 |
| -CNGE | 0.079849 | 1 | 5  | 16 |

|       |          |   |    |    |
|-------|----------|---|----|----|
| -CNPE | 0.079849 | 1 | 5  | 10 |
| -CNYD | 0.079849 | 1 | 5  | 9  |
| -CPMD | 0.079849 | 2 | 10 | 15 |
| -CPQE | 0.079849 | 1 | 5  | 9  |
| -CPYD | 0.079849 | 1 | 5  | 20 |
| -CQEE | 0.079849 | 1 | 5  | 3  |
| -CQKE | 0.079849 | 1 | 5  | 9  |
| -CQMD | 0.079849 | 1 | 5  | 7  |
| -CRAD | 0.079849 | 3 | 15 | 44 |
| -CRVE | 0.079849 | 1 | 5  | 18 |
| -CTAE | 0.079849 | 1 | 5  | 27 |
| -CTFD | 0.079849 | 2 | 10 | 11 |
| -CTKD | 0.079849 | 1 | 5  | 9  |
| -CTME | 0.079849 | 3 | 15 | 22 |
| -CTND | 0.079849 | 2 | 10 | 14 |
| -CTPD | 0.079849 | 2 | 10 | 10 |
| -CTVE | 0.079849 | 2 | 10 | 30 |
| -CVDD | 0.079849 | 1 | 5  | 14 |
| -CVGD | 0.079849 | 1 | 5  | 15 |
| -CVLD | 0.079849 | 2 | 10 | 24 |
| -CVQD | 0.079849 | 1 | 5  | 18 |
| -CWKD | 0.079849 | 2 | 10 | 15 |
| -CWLD | 0.079849 | 1 | 5  | 30 |
| -CWPE | 0.079849 | 2 | 10 | 11 |
| -CWQD | 0.079849 | 1 | 5  | 15 |
| -CWQE | 0.079849 | 2 | 10 | 4  |
| -CWTE | 0.079849 | 1 | 5  | 13 |
| -CYAE | 0.079849 | 2 | 10 | 15 |
| -CYHE | 0.079849 | 1 | 5  | 6  |
| -CYPE | 0.079849 | 1 | 5  | 6  |
| -CYTE | 0.079849 | 1 | 5  | 10 |
| -CFDD | 0.085553 | 3 | 14 | 15 |
| -CSFD | 0.085553 | 3 | 14 | 24 |
| -CAQD | 0.088721 | 2 | 9  | 11 |
| -CEIE | 0.088721 | 2 | 9  | 9  |
| -CHPE | 0.088721 | 2 | 9  | 8  |
| -CIDD | 0.088721 | 2 | 9  | 17 |
| -CLAD | 0.088721 | 2 | 9  | 21 |
| -CNSE | 0.088721 | 2 | 9  | 18 |
| -CQSE | 0.088721 | 2 | 9  | 19 |
| -CSKE | 0.088721 | 2 | 9  | 22 |
| -CSLE | 0.088721 | 4 | 18 | 77 |
| -CSWE | 0.088721 | 4 | 18 | 22 |
| -CTKE | 0.088721 | 2 | 9  | 22 |
| -CYAD | 0.088721 | 2 | 9  | 8  |
| -CYSE | 0.088721 | 4 | 18 | 20 |
| -CLRD | 0.088721 | 6 | 27 | 26 |
| -CAKD | 0.092134 | 3 | 13 | 31 |
| -CHVE | 0.092134 | 3 | 13 | 16 |
| -CRTD | 0.095058 | 5 | 21 | 35 |
| -CAGD | 0.099811 | 1 | 4  | 4  |
| -CAGE | 0.099811 | 2 | 8  | 30 |
| -CAHE | 0.099811 | 1 | 4  | 4  |
| -CAKE | 0.099811 | 1 | 4  | 8  |
| -CATE | 0.099811 | 3 | 12 | 21 |
| -CAYE | 0.099811 | 1 | 4  | 13 |
| -CCDD | 0.099811 | 1 | 4  | 7  |

|       |          |   |    |    |
|-------|----------|---|----|----|
| -CCFE | 0.099811 | 1 | 4  | 20 |
| -CCKE | 0.099811 | 1 | 4  | 15 |
| -CCME | 0.099811 | 1 | 4  | 9  |
| -CCPE | 0.099811 | 2 | 8  | 10 |
| -CCSE | 0.099811 | 1 | 4  | 22 |
| -CCTD | 0.099811 | 1 | 4  | 15 |
| -CDIE | 0.099811 | 1 | 4  | 13 |
| -CDPE | 0.099811 | 1 | 4  | 18 |
| -CDQD | 0.099811 | 2 | 8  | 2  |
| -CDTD | 0.099811 | 2 | 8  | 14 |
| -CDVE | 0.099811 | 1 | 4  | 13 |
| -CEAE | 0.099811 | 1 | 4  | 11 |
| -CEEE | 0.099811 | 1 | 4  | 4  |
| -CEPD | 0.099811 | 1 | 4  | 14 |
| -CEWD | 0.099811 | 1 | 4  | 3  |
| -CFFE | 0.099811 | 1 | 4  | 11 |
| -CFNE | 0.099811 | 1 | 4  | 11 |
| -CFRD | 0.099811 | 1 | 4  | 13 |
| -CGCD | 0.099811 | 1 | 4  | 9  |
| -CGDE | 0.099811 | 1 | 4  | 15 |
| -CGID | 0.099811 | 1 | 4  | 9  |
| -CGME | 0.099811 | 2 | 8  | 18 |
| -CGVE | 0.099811 | 1 | 4  | 16 |
| -CGYD | 0.099811 | 1 | 4  | 8  |
| -CHCE | 0.099811 | 1 | 4  | 8  |
| -CHHD | 0.099811 | 1 | 4  | 11 |
| -CHND | 0.099811 | 1 | 4  | 15 |
| -CKIE | 0.099811 | 1 | 4  | 4  |
| -CKRD | 0.099811 | 1 | 4  | 9  |
| -CKRE | 0.099811 | 2 | 8  | 8  |
| -CLKE | 0.099811 | 1 | 4  | 13 |
| -CLMD | 0.099811 | 1 | 4  | 28 |
| -CMPE | 0.099811 | 2 | 8  | 13 |
| -CMYD | 0.099811 | 1 | 4  | 11 |
| -CNAD | 0.099811 | 1 | 4  | 10 |
| -CNID | 0.099811 | 2 | 8  | 16 |
| -CNMD | 0.099811 | 1 | 4  | 11 |
| -CNPD | 0.099811 | 1 | 4  | 16 |
| -CPCE | 0.099811 | 1 | 4  | 12 |
| -CPEE | 0.099811 | 2 | 8  | 12 |
| -CPGD | 0.099811 | 2 | 8  | 10 |
| -CPID | 0.099811 | 1 | 4  | 7  |
| -CPWE | 0.099811 | 1 | 4  | 5  |
| -CQDE | 0.099811 | 1 | 4  | 9  |
| -CQKD | 0.099811 | 1 | 4  | 3  |
| -CQME | 0.099811 | 1 | 4  | 6  |
| -CQVD | 0.099811 | 1 | 4  | 20 |
| -CRKD | 0.099811 | 2 | 8  | 15 |
| -CRLD | 0.099811 | 1 | 4  | 25 |
| -CRRE | 0.099811 | 2 | 8  | 34 |
| -CSID | 0.099811 | 2 | 8  | 30 |
| -CSQE | 0.099811 | 1 | 4  | 17 |
| -CSSE | 0.099811 | 3 | 12 | 50 |
| -CSTD | 0.099811 | 3 | 12 | 27 |
| -CTDD | 0.099811 | 2 | 8  | 18 |
| -CTLE | 0.099811 | 3 | 12 | 42 |
| -CVFE | 0.099811 | 1 | 4  | 16 |



|       |          |   |    |    |
|-------|----------|---|----|----|
| -CVNE | 0.099811 | 1 | 4  | 20 |
| -CVYE | 0.099811 | 1 | 4  | 10 |
| -CWCD | 0.099811 | 1 | 4  | 11 |
| -CWGE | 0.099811 | 1 | 4  | 9  |
| -CWKE | 0.099811 | 1 | 4  | 6  |
| -CWLE | 0.099811 | 1 | 4  | 26 |
| -CWTD | 0.099811 | 1 | 4  | 13 |
| -CYIE | 0.099811 | 1 | 4  | 8  |
| -CYKD | 0.099811 | 1 | 4  | 13 |
| -CYME | 0.099811 | 1 | 4  | 12 |
| -CYRD | 0.099811 | 1 | 4  | 19 |
| -CYWE | 0.099811 | 1 | 4  | 3  |
| -CLSD | 0.10351  | 7 | 27 | 35 |
| -CAVE | 0.10889  | 3 | 11 | 18 |
| -CLPD | 0.10889  | 3 | 11 | 12 |
| -CRCD | 0.10889  | 3 | 11 | 25 |
| -CRLE | 0.10889  | 3 | 11 | 56 |
| -CRSD | 0.10889  | 3 | 11 | 45 |
| -CSRE | 0.10889  | 3 | 11 | 46 |
| -CVPE | 0.10889  | 3 | 11 | 38 |
| -CAQE | 0.11407  | 2 | 7  | 16 |
| -CARD | 0.11407  | 2 | 7  | 17 |
| -CCPD | 0.11407  | 2 | 7  | 18 |
| -CDAD | 0.11407  | 2 | 7  | 10 |
| -CMYE | 0.11407  | 2 | 7  | 19 |
| -CNLD | 0.11407  | 2 | 7  | 22 |
| -CPVD | 0.11407  | 2 | 7  | 18 |
| -CRMD | 0.11407  | 2 | 7  | 24 |
| -CSCD | 0.11407  | 2 | 7  | 12 |
| -CSYE | 0.11407  | 2 | 7  | 17 |
| -CYGD | 0.11407  | 2 | 7  | 17 |
| -CRED | 0.11977  | 3 | 10 | 17 |
| -CRSE | 0.11977  | 3 | 10 | 62 |
| -CVCE | 0.11977  | 3 | 10 | 21 |
| -CAAD | 0.13308  | 1 | 3  | 18 |
| -CACE | 0.13308  | 1 | 3  | 7  |
| -CAHD | 0.13308  | 2 | 6  | 7  |
| -CCAE | 0.13308  | 2 | 6  | 18 |
| -CCKD | 0.13308  | 1 | 3  | 8  |
| -CCRE | 0.13308  | 1 | 3  | 12 |
| -CCYD | 0.13308  | 1 | 3  | 12 |
| -CDCE | 0.13308  | 1 | 3  | 6  |
| -CDID | 0.13308  | 1 | 3  | 7  |
| -CDKD | 0.13308  | 1 | 3  | 9  |
| -CDYD | 0.13308  | 1 | 3  | 14 |
| -CEND | 0.13308  | 2 | 6  | 10 |
| -CETE | 0.13308  | 1 | 3  | 14 |
| -CEWE | 0.13308  | 1 | 3  | 3  |
| -CFAD | 0.13308  | 1 | 3  | 17 |
| -CFHE | 0.13308  | 1 | 3  | 9  |
| -CFKD | 0.13308  | 1 | 3  | 9  |
| -CFMD | 0.13308  | 1 | 3  | 4  |
| -CFTD | 0.13308  | 1 | 3  | 2  |
| -CFYE | 0.13308  | 1 | 3  | 13 |
| -CGDD | 0.13308  | 1 | 3  | 7  |
| -CGKE | 0.13308  | 1 | 3  | 15 |
| -CGPE | 0.13308  | 2 | 6  | 18 |

|       |         |   |    |    |
|-------|---------|---|----|----|
| -CGWE | 0.13308 | 1 | 3  | 9  |
| -CHDE | 0.13308 | 1 | 3  | 8  |
| -CHKE | 0.13308 | 1 | 3  | 8  |
| -CIDE | 0.13308 | 1 | 3  | 11 |
| -CIKD | 0.13308 | 1 | 3  | 9  |
| -CIQD | 0.13308 | 2 | 6  | 10 |
| -CIYD | 0.13308 | 1 | 3  | 4  |
| -CKED | 0.13308 | 2 | 6  | 6  |
| -CKKE | 0.13308 | 1 | 3  | 4  |
| -CKND | 0.13308 | 1 | 3  | 7  |
| -CKSE | 0.13308 | 2 | 6  | 15 |
| -CKYE | 0.13308 | 1 | 3  | 12 |
| -CLID | 0.13308 | 1 | 3  | 12 |
| -CMAD | 0.13308 | 2 | 6  | 9  |
| -CMCE | 0.13308 | 1 | 3  | 4  |
| -CMED | 0.13308 | 1 | 3  | 4  |
| -CMEE | 0.13308 | 2 | 6  | 11 |
| -CMGE | 0.13308 | 1 | 3  | 15 |
| -CMHD | 0.13308 | 1 | 3  | 6  |
| -CMLE | 0.13308 | 1 | 3  | 20 |
| -CMVD | 0.13308 | 1 | 3  | 5  |
| -CMWE | 0.13308 | 1 | 3  | 8  |
| -CNME | 0.13308 | 1 | 3  | 25 |
| -CPED | 0.13308 | 2 | 6  | 6  |
| -CPHD | 0.13308 | 1 | 3  | 5  |
| -CPTD | 0.13308 | 4 | 12 | 25 |
| -CQAD | 0.13308 | 1 | 3  | 3  |
| -CQDD | 0.13308 | 1 | 3  | 8  |
| -CQGE | 0.13308 | 2 | 6  | 10 |
| -CQHD | 0.13308 | 1 | 3  | 20 |
| -CQID | 0.13308 | 1 | 3  | 11 |
| -CQRD | 0.13308 | 1 | 3  | 17 |
| -CQYD | 0.13308 | 1 | 3  | 8  |
| -CREE | 0.13308 | 1 | 3  | 8  |
| -CRFD | 0.13308 | 1 | 3  | 18 |
| -CSAE | 0.13308 | 2 | 6  | 26 |
| -CSND | 0.13308 | 1 | 3  | 15 |
| -CSPE | 0.13308 | 1 | 3  | 30 |
| -CSWD | 0.13308 | 1 | 3  | 8  |
| -CTDE | 0.13308 | 1 | 3  | 5  |
| -CTEE | 0.13308 | 1 | 3  | 14 |
| -CTNE | 0.13308 | 2 | 6  | 18 |
| -CTVD | 0.13308 | 2 | 6  | 12 |
| -CVCD | 0.13308 | 1 | 3  | 13 |
| -CVHE | 0.13308 | 1 | 3  | 17 |
| -CVKD | 0.13308 | 2 | 6  | 10 |
| -CVKE | 0.13308 | 1 | 3  | 11 |
| -CWCE | 0.13308 | 1 | 3  | 9  |
| -CWGD | 0.13308 | 1 | 3  | 3  |
| -CWID | 0.13308 | 1 | 3  | 5  |
| -CWVD | 0.13308 | 1 | 3  | 5  |
| -CYCD | 0.13308 | 1 | 3  | 7  |
| -CYFE | 0.13308 | 1 | 3  | 8  |
| -CYGE | 0.13308 | 1 | 3  | 5  |
| -CATD | 0.13308 | 3 | 9  | 36 |
| -CENE | 0.13308 | 3 | 9  | 16 |
| -CLYE | 0.13308 | 3 | 9  | 28 |

|       |         |   |    |    |
|-------|---------|---|----|----|
| -CRPD | 0.13308 | 3 | 9  | 28 |
| -CSVE | 0.13308 | 6 | 18 | 42 |
| -CVPD | 0.13308 | 3 | 9  | 22 |
| -CGAD | 0.14091 | 6 | 17 | 9  |
| -CEKD | 0.14518 | 4 | 11 | 16 |
| -CSHE | 0.14709 | 7 | 19 | 32 |
| -CCID | 0.14972 | 3 | 8  | 13 |
| -CDVD | 0.14972 | 3 | 8  | 19 |
| -CLME | 0.14972 | 3 | 8  | 20 |
| -CPAD | 0.14972 | 3 | 8  | 23 |
| -CSSD | 0.14972 | 6 | 16 | 40 |
| -CQRE | 0.15356 | 5 | 13 | 10 |
| -CRPE | 0.15356 | 5 | 13 | 34 |
| -CAND | 0.1597  | 2 | 5  | 11 |
| -CFPD | 0.1597  | 2 | 5  | 13 |
| -CFSD | 0.1597  | 4 | 10 | 14 |
| -CGCE | 0.1597  | 2 | 5  | 13 |
| -CGHD | 0.1597  | 2 | 5  | 12 |
| -CGWD | 0.1597  | 2 | 5  | 7  |
| -CISE | 0.1597  | 2 | 5  | 20 |
| -CLND | 0.1597  | 2 | 5  | 20 |
| -CNDD | 0.1597  | 2 | 5  | 14 |
| -CNFE | 0.1597  | 2 | 5  | 4  |
| -CRHD | 0.1597  | 2 | 5  | 20 |
| -CSCE | 0.1597  | 2 | 5  | 13 |
| -CWPD | 0.1597  | 2 | 5  | 11 |
| -CMRD | 0.16635 | 5 | 12 | 23 |
| -CPYE | 0.16635 | 5 | 12 | 13 |
| -CQTD | 0.17111 | 3 | 7  | 14 |
| -CYVE | 0.17111 | 3 | 7  | 19 |
| -CAIE | 0.17744 | 4 | 9  | 20 |
| -CVLE | 0.18148 | 5 | 11 | 37 |
| -CACD | 0.19962 | 1 | 2  | 10 |
| -CADD | 0.19962 | 2 | 4  | 23 |
| -CAWD | 0.19962 | 1 | 2  | 17 |
| -CAWE | 0.19962 | 1 | 2  | 8  |
| -CAYD | 0.19962 | 2 | 4  | 17 |
| -CCGD | 0.19962 | 1 | 2  | 1  |
| -CCMD | 0.19962 | 1 | 2  | 2  |
| -CCND | 0.19962 | 1 | 2  | 3  |
| -CCNE | 0.19962 | 1 | 2  | 5  |
| -CCQD | 0.19962 | 1 | 2  | 6  |
| -CCVD | 0.19962 | 1 | 2  | 21 |
| -CCWE | 0.19962 | 1 | 2  | 4  |
| -CDED | 0.19962 | 1 | 2  | 6  |
| -CDHE | 0.19962 | 1 | 2  | 10 |
| -CDKE | 0.19962 | 2 | 4  | 16 |
| -CDMD | 0.19962 | 1 | 2  | 4  |
| -CEFE | 0.19962 | 1 | 2  | 4  |
| -CEHD | 0.19962 | 1 | 2  | 7  |
| -CFDE | 0.19962 | 1 | 2  | 6  |
| -CFED | 0.19962 | 1 | 2  | 1  |
| -CFEE | 0.19962 | 2 | 4  | 9  |
| -CFLE | 0.19962 | 4 | 8  | 7  |
| -CFVD | 0.19962 | 2 | 4  | 13 |
| -CFVE | 0.19962 | 1 | 2  | 9  |
| -CFWD | 0.19962 | 1 | 2  | 5  |

|        |         |   |   |    |
|--------|---------|---|---|----|
| -CGED  | 0.19962 | 3 | 6 | 11 |
| -CGRD  | 0.19962 | 2 | 4 | 23 |
| -CHFEE | 0.19962 | 1 | 2 | 2  |
| -CHHE  | 0.19962 | 1 | 2 | 8  |
| -CHLD  | 0.19962 | 4 | 8 | 26 |
| -CHQD  | 0.19962 | 1 | 2 | 6  |
| -CHWD  | 0.19962 | 1 | 2 | 8  |
| -CHWE  | 0.19962 | 1 | 2 | 5  |
| -CHYE  | 0.19962 | 2 | 4 | 16 |
| -CIAD  | 0.19962 | 1 | 2 | 11 |
| -CIFD  | 0.19962 | 1 | 2 | 9  |
| -CIGD  | 0.19962 | 2 | 4 | 11 |
| -CIHE  | 0.19962 | 2 | 4 | 10 |
| -CILD  | 0.19962 | 2 | 4 | 26 |
| -CIME  | 0.19962 | 1 | 2 | 4  |
| -CIND  | 0.19962 | 1 | 2 | 9  |
| -CIPE  | 0.19962 | 1 | 2 | 14 |
| -CIWD  | 0.19962 | 1 | 2 | 8  |
| -CKGD  | 0.19962 | 1 | 2 | 7  |
| -CKHE  | 0.19962 | 1 | 2 | 6  |
| -CKTD  | 0.19962 | 2 | 4 | 19 |
| -CLCD  | 0.19962 | 1 | 2 | 6  |
| -CLDE  | 0.19962 | 3 | 6 | 13 |
| -CLVD  | 0.19962 | 1 | 2 | 20 |
| -CLWE  | 0.19962 | 1 | 2 | 8  |
| -CMCD  | 0.19962 | 1 | 2 | 12 |
| -CMKD  | 0.19962 | 1 | 2 | 8  |
| -CMND  | 0.19962 | 1 | 2 | 6  |
| -CMQD  | 0.19962 | 1 | 2 | 2  |
| -CMQE  | 0.19962 | 2 | 4 | 6  |
| -CMWD  | 0.19962 | 1 | 2 | 8  |
| -CNGD  | 0.19962 | 1 | 2 | 6  |
| -CNQE  | 0.19962 | 1 | 2 | 2  |
| -CNVE  | 0.19962 | 2 | 4 | 21 |
| -CNWD  | 0.19962 | 1 | 2 | 4  |
| -CNWE  | 0.19962 | 1 | 2 | 7  |
| -CPPD  | 0.19962 | 2 | 4 | 8  |
| -CPPE  | 0.19962 | 2 | 4 | 12 |
| -CQCE  | 0.19962 | 1 | 2 | 7  |
| -CQED  | 0.19962 | 1 | 2 | 7  |
| -CQFD  | 0.19962 | 3 | 6 | 3  |
| -CQFE  | 0.19962 | 1 | 2 | 7  |
| -CQQD  | 0.19962 | 1 | 2 | 12 |
| -CRID  | 0.19962 | 1 | 2 | 18 |
| -CRIE  | 0.19962 | 2 | 4 | 22 |
| -CRVD  | 0.19962 | 3 | 6 | 21 |
| -CRWE  | 0.19962 | 2 | 4 | 13 |
| -CTHE  | 0.19962 | 2 | 4 | 21 |
| -CTWE  | 0.19962 | 1 | 2 | 13 |
| -CTYE  | 0.19962 | 1 | 2 | 17 |
| -CVED  | 0.19962 | 2 | 4 | 24 |
| -CVFD  | 0.19962 | 1 | 2 | 12 |
| -CVHD  | 0.19962 | 1 | 2 | 10 |
| -CVME  | 0.19962 | 2 | 4 | 18 |
| -CVWD  | 0.19962 | 1 | 2 | 17 |
| -CVWE  | 0.19962 | 1 | 2 | 4  |
| -CWAE  | 0.19962 | 1 | 2 | 7  |

|        |         |    |    |    |
|--------|---------|----|----|----|
| -CWDE  | 0.19962 | 1  | 2  | 1  |
| -CWME  | 0.19962 | 1  | 2  | 14 |
| -CWRD  | 0.19962 | 1  | 2  | 12 |
| -CWRE  | 0.19962 | 1  | 2  | 4  |
| -CYDD  | 0.19962 | 1  | 2  | 5  |
| -CYFD  | 0.19962 | 1  | 2  | 6  |
| -CYYD  | 0.19962 | 1  | 2  | 6  |
| -CYYE  | 0.19962 | 1  | 2  | 17 |
| -CVVD  | 0.19962 | 5  | 10 | 14 |
| -CDRD  | 0.21777 | 6  | 11 | 19 |
| -CHVD  | 0.22814 | 4  | 7  | 16 |
| -CILE  | 0.22814 | 4  | 7  | 20 |
| -CPSD  | 0.23114 | 11 | 19 | 27 |
| -CCEE  | 0.23955 | 3  | 5  | 2  |
| -CFTE  | 0.23955 | 3  | 5  | 19 |
| -CPCD  | 0.23955 | 3  | 5  | 6  |
| -CQAE  | 0.24953 | 5  | 8  | 17 |
| -CCCD  | 0.26616 | 2  | 3  | 10 |
| -CCLE  | 0.26616 | 2  | 3  | 22 |
| -CCWD  | 0.26616 | 2  | 3  | 2  |
| -CDLE  | 0.26616 | 2  | 3  | 16 |
| -CDND  | 0.26616 | 2  | 3  | 15 |
| -CGNE  | 0.26616 | 2  | 3  | 8  |
| -CKAE  | 0.26616 | 2  | 3  | 11 |
| -CKFD  | 0.26616 | 2  | 3  | 18 |
| -CKGE  | 0.26616 | 2  | 3  | 5  |
| -CKWD  | 0.26616 | 2  | 3  | 5  |
| -CMAE  | 0.26616 | 2  | 3  | 13 |
| -CMKE  | 0.26616 | 2  | 3  | 7  |
| -CPDD  | 0.26616 | 2  | 3  | 10 |
| -CQND  | 0.26616 | 2  | 3  | 6  |
| -CRWD  | 0.26616 | 2  | 3  | 10 |
| -CTCE  | 0.26616 | 2  | 3  | 21 |
| -CTQD  | 0.26616 | 2  | 3  | 10 |
| -CTWD  | 0.26616 | 2  | 3  | 5  |
| -CWED  | 0.26616 | 2  | 3  | 7  |
| -CWYD  | 0.26616 | 2  | 3  | 25 |
| -CWYE  | 0.26616 | 2  | 3  | 12 |
| -CYDE  | 0.26616 | 2  | 3  | 8  |
| -CYMD  | 0.26616 | 2  | 3  | 14 |
| -CTAD  | 0.26616 | 6  | 9  | 24 |
| -CTYD  | 0.26616 | 6  | 9  | 22 |
| -CTMD  | 0.28518 | 5  | 7  | 18 |
| -CSYD  | 0.29036 | 8  | 11 | 21 |
| -CAID  | 0.29943 | 3  | 4  | 16 |
| -CDGD  | 0.29943 | 3  | 4  | 15 |
| -CGTD  | 0.29943 | 3  | 4  | 7  |
| -CPME  | 0.29943 | 3  | 4  | 15 |
| -CPND  | 0.29943 | 3  | 4  | 9  |
| -CSED  | 0.29943 | 6  | 8  | 31 |
| -CRDD  | 0.31052 | 7  | 9  | 22 |
| -CDWD  | 0.3194  | 4  | 5  | 9  |
| -CEGE  | 0.3194  | 4  | 5  | 3  |
| -CYVD  | 0.3194  | 4  | 5  | 19 |
| -CDS D | 0.32666 | 9  | 11 | 23 |
| -CIVE  | 0.3327  | 5  | 6  | 17 |
| -CNED  | 0.3327  | 5  | 6  | 13 |

|       |         |   |   |    |
|-------|---------|---|---|----|
| -CCIE | 0.34221 | 6 | 7 | 14 |
| -CYS  | 0.34221 | 6 | 7 | 18 |
| -CAED | 0.39925 | 1 | 1 | 8  |
| -CAPD | 0.39925 | 2 | 2 | 10 |
| -CCCE | 0.39925 | 1 | 1 | 7  |
| -CCFD | 0.39925 | 1 | 1 | 1  |
| -CCQE | 0.39925 | 1 | 1 | 3  |
| -CCSD | 0.39925 | 4 | 4 | 13 |
| -CCVE | 0.39925 | 1 | 1 | 7  |
| -CDFE | 0.39925 | 1 | 1 | 2  |
| -CDQE | 0.39925 | 1 | 1 | 2  |
| -CEDE | 0.39925 | 1 | 1 | 1  |
| -CEID | 0.39925 | 1 | 1 | 5  |
| -CEME | 0.39925 | 1 | 1 | 6  |
| -CEPE | 0.39925 | 1 | 1 | 12 |
| -CEQD | 0.39925 | 1 | 1 | 6  |
| -CEQE | 0.39925 | 2 | 2 | 9  |
| -CFFD | 0.39925 | 1 | 1 | 5  |
| -CFHD | 0.39925 | 1 | 1 | 11 |
| -CFIE | 0.39925 | 1 | 1 | 11 |
| -CFKE | 0.39925 | 1 | 1 | 4  |
| -CFLD | 0.39925 | 1 | 1 | 12 |
| -CFME | 0.39925 | 2 | 2 | 14 |
| -CFQD | 0.39925 | 1 | 1 | 6  |
| -CFWE | 0.39925 | 1 | 1 | 4  |
| -CFYD | 0.39925 | 1 | 1 | 6  |
| -CGFE | 0.39925 | 1 | 1 | 7  |
| -CGHE | 0.39925 | 1 | 1 | 8  |
| -CGQD | 0.39925 | 1 | 1 | 8  |
| -CHDD | 0.39925 | 2 | 2 | 6  |
| -CHFD | 0.39925 | 1 | 1 | 7  |
| -CHKD | 0.39925 | 1 | 1 | 2  |
| -CHME | 0.39925 | 1 | 1 | 10 |
| -CHNE | 0.39925 | 2 | 2 | 15 |
| -CHPD | 0.39925 | 2 | 2 | 7  |
| -CHQE | 0.39925 | 2 | 2 | 17 |
| -CHRD | 0.39925 | 8 | 8 | 10 |
| -CHYD | 0.39925 | 1 | 1 | 16 |
| -CICD | 0.39925 | 1 | 1 | 1  |
| -CICE | 0.39925 | 1 | 1 | 4  |
| -CIED | 0.39925 | 1 | 1 | 3  |
| -CIFE | 0.39925 | 1 | 1 | 3  |
| -CINE | 0.39925 | 2 | 2 | 8  |
| -CIRD | 0.39925 | 2 | 2 | 8  |
| -CIWE | 0.39925 | 1 | 1 | 6  |
| -CKCE | 0.39925 | 1 | 1 | 5  |
| -CKDD | 0.39925 | 1 | 1 | 7  |
| -CKFE | 0.39925 | 2 | 2 | 7  |
| -CKHD | 0.39925 | 1 | 1 | 2  |
| -CKVD | 0.39925 | 2 | 2 | 7  |
| -CKWE | 0.39925 | 1 | 1 | 8  |
| -CLIE | 0.39925 | 2 | 2 | 5  |
| -CLWD | 0.39925 | 2 | 2 | 19 |
| -CMDE | 0.39925 | 1 | 1 | 1  |
| -CMFD | 0.39925 | 1 | 1 | 3  |
| -CMGD | 0.39925 | 2 | 2 | 8  |
| -CMME | 0.39925 | 1 | 1 | 2  |

|              |                |           |          |           |
|--------------|----------------|-----------|----------|-----------|
| -CNCD        | 0.39925        | 1         | 1        | 4         |
| -CNFD        | 0.39925        | 1         | 1        | 2         |
| -CNKE        | 0.39925        | 1         | 1        | 7         |
| -CNNE        | 0.39925        | 1         | 1        | 8         |
| -CNRE        | 0.39925        | 1         | 1        | 23        |
| -CPQD        | 0.39925        | 1         | 1        | 4         |
| -CPWD        | 0.39925        | 2         | 2        | 11        |
| -CQCD        | 0.39925        | 1         | 1        | 2         |
| -CQHE        | 0.39925        | 1         | 1        | 2         |
| -CQPD        | 0.39925        | 1         | 1        | 2         |
| -CQPE        | 0.39925        | 1         | 1        | 4         |
| -CQQE        | 0.39925        | 1         | 1        | 1         |
| -CQWD        | 0.39925        | 2         | 2        | 3         |
| -CQWE        | 0.39925        | 1         | 1        | 5         |
| -CQYE        | 0.39925        | 1         | 1        | 3         |
| -CWAD        | 0.39925        | 2         | 2        | 6         |
| -CWDD        | 0.39925        | 1         | 1        | 5         |
| -CWEE        | 0.39925        | 1         | 1        | 1         |
| -CWFD        | 0.39925        | 1         | 1        | 12        |
| -CWFE        | 0.39925        | 1         | 1        | 6         |
| -CWHD        | 0.39925        | 1         | 1        | 4         |
| -CWHE        | 0.39925        | 1         | 1        | 4         |
| -CWIE        | 0.39925        | 1         | 1        | 9         |
| -CWMD        | 0.39925        | 1         | 1        | 5         |
| -CWND        | 0.39925        | 1         | 1        | 7         |
| -CWVE        | 0.39925        | 1         | 1        | 7         |
| -CWWD        | 0.39925        | 1         | 1        | 2         |
| -CWWE        | 0.39925        | 1         | 1        | 3         |
| -CYCE        | 0.39925        | 1         | 1        | 9         |
| -CYHD        | 0.39925        | 2         | 2        | 6         |
| -CYID        | 0.39925        | 1         | 1        | 10        |
| -CYNE        | 0.39925        | 1         | 1        | 4         |
| -CYQD        | 0.39925        | 1         | 1        | 7         |
| -CYQE        | 0.39925        | 2         | 2        | 9         |
| -CYWD        | 0.39925        | 1         | 1        | 2         |
| -CDPD        | 0.46579        | 7         | 6        | 18        |
| -CVVE        | 0.50813        | 28        | 22       | 31        |
| -CMHE        | 0.53233        | 4         | 3        | 9         |
| -CPAE        | 0.53233        | 4         | 3        | 24        |
| -CCHD        | 0.59887        | 3         | 2        | 8         |
| -CEDD        | 0.59887        | 3         | 2        | 3         |
| -CFRE        | 0.59887        | 3         | 2        | 17        |
| -CIVD        | 0.59887        | 12        | 8        | 21        |
| -CKID        | 0.59887        | 3         | 2        | 6         |
| -CNCE        | 0.59887        | 6         | 4        | 23        |
| -CSQD        | 0.59887        | 3         | 2        | 10        |
| -CYND        | 0.59887        | 3         | 2        | 10        |
| <b>-CTID</b> | <b>0.62739</b> | <b>11</b> | <b>7</b> | <b>10</b> |
| -CPGE        | 0.66541        | 5         | 3        | 20        |
| -CCRD        | 0.79849        | 4         | 2        | 24        |
| -CEMD        | 0.79849        | 2         | 1        | 6         |
| -CHAD        | 0.79849        | 2         | 1        | 18        |
| -CIMD        | 0.79849        | 2         | 1        | 3         |
| -CKPD        | 0.79849        | 2         | 1        | 6         |
| -CMNE        | 0.79849        | 2         | 1        | 7         |
| -CNQD        | 0.79849        | 2         | 1        | 5         |
| -CQLE        | 0.79849        | 2         | 1        | 9         |

|       |         |     |    |    |
|-------|---------|-----|----|----|
| -CRHE | 0.79849 | 2   | 1  | 14 |
| -CVMD | 0.79849 | 2   | 1  | 11 |
| -CMID | 1.1977  | 3   | 1  | 13 |
| -CIIE | 1.4639  | 11  | 3  | 5  |
| -CTIE | 2.8945  | 58  | 8  | 16 |
| -CIID | 5.0904  | 51  | 4  | 18 |
| -CVIE | 5.6054  | 351 | 25 | 41 |
| -CVID | 15.0116 | 376 | 10 | 18 |

**Note:**β-branched in A1 and Ile in A2 are highlighted in yellow



### 3. Enrichment Factors of Sequencing Motives Ending with –CXXR/K

| Motif | Enrichment | Counts |       |       |
|-------|------------|--------|-------|-------|
|       |            | 37 °C  | 25 °C | Naive |
| -CEVR | 0.014259   | 1      | 28    | 41    |
| -CLNR | 0.014787   | 1      | 27    | 76    |
| -CERR | 0.015356   | 1      | 26    | 52    |
| -CDSK | 0.01597    | 1      | 25    | 29    |
| -CRSK | 0.01597    | 1      | 25    | 32    |
| -CVPR | 0.01597    | 1      | 25    | 37    |
| -CERK | 0.017359   | 1      | 23    | 19    |
| -CLGK | 0.017359   | 1      | 23    | 33    |
| -CNTR | 0.017359   | 1      | 23    | 39    |
| -CVDR | 0.017359   | 1      | 23    | 31    |
| -CASR | 0.018148   | 1      | 22    | 64    |
| -CGSK | 0.018148   | 1      | 22    | 40    |
| -CVNR | 0.018148   | 1      | 22    | 49    |
| -CTAR | 0.019475   | 2      | 41    | 74    |
| -CPER | 0.019962   | 1      | 20    | 33    |
| -CLDK | 0.021013   | 1      | 19    | 23    |
| -CSNR | 0.021581   | 2      | 37    | 58    |
| -CPLR | 0.02218    | 1      | 18    | 77    |
| -CSTK | 0.02218    | 1      | 18    | 35    |
| -CSYR | 0.02218    | 1      | 18    | 64    |
| -CLTR | 0.022814   | 2      | 35    | 115   |
| -CGPR | 0.023485   | 1      | 17    | 51    |
| -CNSR | 0.023485   | 2      | 34    | 52    |
| -CPLK | 0.023485   | 2      | 34    | 36    |
| -CPSR | 0.023485   | 2      | 34    | 82    |
| -CQRK | 0.024953   | 1      | 16    | 22    |
| -CRNR | 0.024953   | 1      | 16    | 42    |
| -CISK | 0.026616   | 1      | 15    | 28    |
| -CKNR | 0.026616   | 1      | 15    | 19    |
| -CRPR | 0.026616   | 1      | 15    | 58    |
| -CSAK | 0.026616   | 1      | 15    | 31    |
| -CTYR | 0.026616   | 1      | 15    | 49    |
| -CYIK | 0.026616   | 1      | 15    | 11    |
| -CGKR | 0.028518   | 1      | 14    | 53    |
| -CIGR | 0.028518   | 1      | 14    | 35    |
| -CIVK | 0.028518   | 1      | 14    | 19    |
| -CNMK | 0.028518   | 1      | 14    | 15    |
| -CVSR | 0.028518   | 2      | 28    | 54    |
| -CANR | 0.030711   | 1      | 13    | 43    |
| -CHLK | 0.030711   | 1      | 13    | 32    |
| -CKAR | 0.030711   | 1      | 13    | 28    |
| -CKGR | 0.030711   | 1      | 13    | 19    |
| -CKRK | 0.030711   | 1      | 13    | 27    |
| -CLTK | 0.030711   | 2      | 26    | 25    |
| -CPTR | 0.030711   | 2      | 26    | 41    |
| -CQDR | 0.030711   | 1      | 13    | 16    |
| -CQMK | 0.030711   | 1      | 13    | 10    |
| -CRLK | 0.030711   | 1      | 13    | 39    |
| -CSHK | 0.030711   | 1      | 13    | 16    |
| -CSKR | 0.030711   | 1      | 13    | 54    |

|       |          |   |    |     |
|-------|----------|---|----|-----|
| -CTDK | 0.030711 | 1 | 13 | 16  |
| -CVER | 0.030711 | 1 | 13 | 35  |
| -CVVK | 0.030711 | 1 | 13 | 28  |
| -CSSR | 0.031313 | 4 | 51 | 105 |
| -CLSK | 0.03194  | 2 | 25 | 57  |
| -CCKK | 0.03327  | 1 | 12 | 18  |
| -CDFR | 0.03327  | 1 | 12 | 39  |
| -CELK | 0.03327  | 1 | 12 | 18  |
| -CETK | 0.03327  | 1 | 12 | 13  |
| -CFGR | 0.03327  | 1 | 12 | 32  |
| -CKLK | 0.03327  | 1 | 12 | 40  |
| -CKRR | 0.03327  | 1 | 12 | 44  |
| -CKVR | 0.03327  | 2 | 24 | 34  |
| -CQLK | 0.03327  | 1 | 12 | 13  |
| -CSHR | 0.03327  | 1 | 12 | 36  |
| -CTYK | 0.03327  | 1 | 12 | 25  |
| -CPRR | 0.034717 | 2 | 23 | 66  |
| -CSRK | 0.034717 | 2 | 23 | 51  |
| -CTPR | 0.034717 | 2 | 23 | 45  |
| -CDGR | 0.036295 | 1 | 11 | 29  |
| -CEFK | 0.036295 | 1 | 11 | 15  |
| -CEGR | 0.036295 | 1 | 11 | 23  |
| -CESK | 0.036295 | 2 | 22 | 34  |
| -CGDK | 0.036295 | 1 | 11 | 21  |
| -CIRK | 0.036295 | 1 | 11 | 33  |
| -CKPR | 0.036295 | 1 | 11 | 26  |
| -CKQK | 0.036295 | 1 | 11 | 16  |
| -CLKR | 0.036295 | 2 | 22 | 50  |
| -CMPK | 0.036295 | 1 | 11 | 26  |
| -CTER | 0.036295 | 1 | 11 | 34  |
| -CTGK | 0.036295 | 1 | 11 | 29  |
| -CTKK | 0.036295 | 1 | 11 | 32  |
| -CTRK | 0.036295 | 1 | 11 | 39  |
| -CVEK | 0.036295 | 1 | 11 | 19  |
| -CYSR | 0.036295 | 1 | 11 | 30  |
| -CLNK | 0.038023 | 2 | 21 | 25  |
| -CPQK | 0.038023 | 2 | 21 | 15  |
| -CLLK | 0.038637 | 3 | 31 | 73  |
| -CEER | 0.039925 | 1 | 10 | 12  |
| -CENR | 0.039925 | 1 | 10 | 21  |
| -CFTK | 0.039925 | 1 | 10 | 12  |
| -CIPR | 0.039925 | 1 | 10 | 24  |
| -CLAK | 0.039925 | 2 | 20 | 34  |
| -CLAR | 0.039925 | 3 | 30 | 59  |
| -CLKK | 0.039925 | 1 | 10 | 19  |
| -CNLK | 0.039925 | 2 | 20 | 40  |
| -CQTR | 0.039925 | 1 | 10 | 40  |
| -CRAK | 0.039925 | 2 | 20 | 46  |
| -CRKR | 0.039925 | 2 | 20 | 44  |
| -CSVK | 0.039925 | 2 | 20 | 42  |
| -CWTK | 0.039925 | 1 | 10 | 9   |
| -CWTR | 0.039925 | 1 | 10 | 32  |
| -CYWR | 0.039925 | 1 | 10 | 28  |
| -CTSK | 0.041301 | 3 | 29 | 40  |
| -CISR | 0.042026 | 2 | 19 | 33  |
| -CPPK | 0.042026 | 2 | 19 | 18  |
| -CSLK | 0.042026 | 2 | 19 | 64  |

|       |          |   |    |    |
|-------|----------|---|----|----|
| -CVPK | 0.042026 | 2 | 19 | 21 |
| -CAIR | 0.044361 | 1 | 9  | 38 |
| -CDYR | 0.044361 | 1 | 9  | 30 |
| -CEDR | 0.044361 | 1 | 9  | 8  |
| -CEKR | 0.044361 | 1 | 9  | 21 |
| -CFPR | 0.044361 | 1 | 9  | 26 |
| -CIHR | 0.044361 | 1 | 9  | 18 |
| -CIYK | 0.044361 | 1 | 9  | 31 |
| -CKMK | 0.044361 | 1 | 9  | 11 |
| -CLVK | 0.044361 | 1 | 9  | 18 |
| -CNIK | 0.044361 | 1 | 9  | 8  |
| -CRQR | 0.044361 | 1 | 9  | 47 |
| -CSAR | 0.044361 | 2 | 18 | 79 |
| -CTPK | 0.044361 | 1 | 9  | 23 |
| -CTVK | 0.044361 | 2 | 18 | 24 |
| -CYVK | 0.044361 | 1 | 9  | 38 |
| -CRSR | 0.044361 | 3 | 27 | 77 |
| -CDLR | 0.045369 | 5 | 44 | 54 |
| -CGSR | 0.04697  | 4 | 34 | 50 |
| -CITR | 0.04697  | 2 | 17 | 74 |
| -CPVK | 0.04697  | 2 | 17 | 26 |
| -CTTK | 0.04697  | 2 | 17 | 14 |
| -CVKR | 0.04697  | 2 | 17 | 40 |
| -CRDR | 0.047909 | 3 | 25 | 43 |
| -CVLR | 0.048688 | 5 | 41 | 83 |
| -CDGK | 0.049906 | 1 | 8  | 19 |
| -CESR | 0.049906 | 4 | 32 | 39 |
| -CFFR | 0.049906 | 1 | 8  | 11 |
| -CGGR | 0.049906 | 1 | 8  | 33 |
| -CHLR | 0.049906 | 1 | 8  | 75 |
| -CHMR | 0.049906 | 1 | 8  | 12 |
| -CIAR | 0.049906 | 2 | 16 | 33 |
| -CIEK | 0.049906 | 2 | 16 | 26 |
| -CKCK | 0.049906 | 1 | 8  | 19 |
| -CKSR | 0.049906 | 2 | 16 | 62 |
| -CMAR | 0.049906 | 1 | 8  | 22 |
| -CMLR | 0.049906 | 1 | 8  | 60 |
| -CMNK | 0.049906 | 1 | 8  | 11 |
| -CMSR | 0.049906 | 1 | 8  | 31 |
| -CNFR | 0.049906 | 1 | 8  | 20 |
| -CNHK | 0.049906 | 1 | 8  | 20 |
| -CPEK | 0.049906 | 1 | 8  | 8  |
| -CPFK | 0.049906 | 1 | 8  | 17 |
| -CPRK | 0.049906 | 2 | 16 | 34 |
| -CPTK | 0.049906 | 1 | 8  | 22 |
| -CPVR | 0.049906 | 3 | 24 | 78 |
| -CRVK | 0.049906 | 2 | 16 | 33 |
| -CSPR | 0.049906 | 2 | 16 | 73 |
| -CSQR | 0.049906 | 1 | 8  | 27 |
| -CTMK | 0.049906 | 1 | 8  | 16 |
| -CYAR | 0.049906 | 1 | 8  | 30 |
| -CYTR | 0.049906 | 2 | 16 | 52 |
| -CSSK | 0.052076 | 3 | 23 | 64 |
| -CARK | 0.053233 | 2 | 15 | 50 |
| -CKLR | 0.053233 | 2 | 15 | 71 |
| -CPKR | 0.053233 | 2 | 15 | 30 |
| -CRER | 0.053233 | 2 | 15 | 46 |

|       |          |   |    |     |
|-------|----------|---|----|-----|
| -CTFK | 0.053233 | 2 | 15 | 21  |
| -CTHK | 0.053233 | 2 | 15 | 18  |
| -CTKR | 0.053233 | 2 | 15 | 41  |
| -CAKK | 0.054443 | 3 | 22 | 36  |
| -CLRR | 0.054443 | 3 | 22 | 88  |
| -CAAR | 0.057035 | 1 | 7  | 25  |
| -CAVK | 0.057035 | 1 | 7  | 35  |
| -CCSK | 0.057035 | 1 | 7  | 19  |
| -CDQR | 0.057035 | 1 | 7  | 19  |
| -CETR | 0.057035 | 1 | 7  | 16  |
| -CFRR | 0.057035 | 1 | 7  | 44  |
| -CFYR | 0.057035 | 1 | 7  | 23  |
| -CGER | 0.057035 | 1 | 7  | 19  |
| -CHPR | 0.057035 | 1 | 7  | 21  |
| -CHVK | 0.057035 | 1 | 7  | 11  |
| -CIPK | 0.057035 | 1 | 7  | 22  |
| -CIYR | 0.057035 | 1 | 7  | 27  |
| -CKIR | 0.057035 | 1 | 7  | 23  |
| -CKKR | 0.057035 | 1 | 7  | 12  |
| -CLFK | 0.057035 | 1 | 7  | 12  |
| -CMPR | 0.057035 | 1 | 7  | 32  |
| -CNEK | 0.057035 | 1 | 7  | 21  |
| -CPIR | 0.057035 | 2 | 14 | 36  |
| -CPKK | 0.057035 | 1 | 7  | 18  |
| -CQYR | 0.057035 | 1 | 7  | 28  |
| -CSFK | 0.057035 | 1 | 7  | 21  |
| -CSIK | 0.057035 | 1 | 7  | 29  |
| -CTNK | 0.057035 | 1 | 7  | 18  |
| -CVNK | 0.057035 | 1 | 7  | 19  |
| -CWSR | 0.057035 | 1 | 7  | 28  |
| -CYCR | 0.057035 | 1 | 7  | 28  |
| -CRTR | 0.057035 | 3 | 21 | 111 |
| -CVSK | 0.057035 | 3 | 21 | 45  |
| -CNKR | 0.059887 | 3 | 20 | 32  |
| -CSRR | 0.059887 | 3 | 20 | 96  |
| -CVGK | 0.059887 | 3 | 20 | 18  |
| -CLPR | 0.060755 | 7 | 46 | 72  |
| -CDDR | 0.061422 | 2 | 13 | 31  |
| -CEMR | 0.061422 | 2 | 13 | 17  |
| -CTNR | 0.061422 | 4 | 26 | 54  |
| -CVRK | 0.061422 | 2 | 13 | 36  |
| -CVTR | 0.061422 | 2 | 13 | 30  |
| -CNDR | 0.063039 | 3 | 19 | 25  |
| -CVAR | 0.063039 | 3 | 19 | 59  |
| -CAGR | 0.066541 | 1 | 6  | 33  |
| -CAKR | 0.066541 | 2 | 12 | 30  |
| -CATR | 0.066541 | 2 | 12 | 43  |
| -CAYR | 0.066541 | 1 | 6  | 29  |
| -CCLK | 0.066541 | 1 | 6  | 6   |
| -CCNK | 0.066541 | 1 | 6  | 13  |
| -CCPK | 0.066541 | 1 | 6  | 8   |
| -CCPR | 0.066541 | 1 | 6  | 22  |
| -CDCR | 0.066541 | 1 | 6  | 24  |
| -CDMR | 0.066541 | 2 | 12 | 21  |
| -CDRK | 0.066541 | 2 | 12 | 30  |
| -CEDK | 0.066541 | 1 | 6  | 12  |
| -CEHR | 0.066541 | 1 | 6  | 19  |

|       |          |   |    |     |
|-------|----------|---|----|-----|
| -CEPR | 0.066541 | 2 | 12 | 30  |
| -CFAK | 0.066541 | 1 | 6  | 14  |
| -CFDR | 0.066541 | 2 | 12 | 13  |
| -CFLR | 0.066541 | 2 | 12 | 41  |
| -CFRK | 0.066541 | 1 | 6  | 12  |
| -CGAR | 0.066541 | 1 | 6  | 43  |
| -CGFR | 0.066541 | 1 | 6  | 24  |
| -CGMK | 0.066541 | 1 | 6  | 17  |
| -CGTR | 0.066541 | 1 | 6  | 52  |
| -CIIK | 0.066541 | 1 | 6  | 9   |
| -CILK | 0.066541 | 1 | 6  | 23  |
| -CIMK | 0.066541 | 1 | 6  | 25  |
| -CIWK | 0.066541 | 1 | 6  | 4   |
| -CKFK | 0.066541 | 1 | 6  | 16  |
| -CKYK | 0.066541 | 1 | 6  | 6   |
| -CLYK | 0.066541 | 2 | 12 | 42  |
| -CMDK | 0.066541 | 1 | 6  | 10  |
| -CMGK | 0.066541 | 1 | 6  | 20  |
| -CMKR | 0.066541 | 1 | 6  | 13  |
| -CMLK | 0.066541 | 1 | 6  | 22  |
| -CNGK | 0.066541 | 1 | 6  | 10  |
| -CNNK | 0.066541 | 1 | 6  | 10  |
| -CNQR | 0.066541 | 1 | 6  | 14  |
| -CNWK | 0.066541 | 1 | 6  | 16  |
| -CPAR | 0.066541 | 2 | 12 | 39  |
| -CPMR | 0.066541 | 1 | 6  | 37  |
| -CQAR | 0.066541 | 1 | 6  | 14  |
| -CQGR | 0.066541 | 1 | 6  | 18  |
| -CQHR | 0.066541 | 1 | 6  | 21  |
| -CQKR | 0.066541 | 2 | 12 | 16  |
| -CQLR | 0.066541 | 2 | 12 | 30  |
| -CRKK | 0.066541 | 1 | 6  | 17  |
| -CRLR | 0.066541 | 4 | 24 | 142 |
| -CSCK | 0.066541 | 1 | 6  | 20  |
| -CSKK | 0.066541 | 1 | 6  | 29  |
| -CSNK | 0.066541 | 2 | 12 | 18  |
| -CVCK | 0.066541 | 1 | 6  | 13  |
| -CVKK | 0.066541 | 2 | 12 | 33  |
| -CVLK | 0.066541 | 4 | 24 | 33  |
| -CVQK | 0.066541 | 1 | 6  | 34  |
| -CVYK | 0.066541 | 1 | 6  | 15  |
| -CWRR | 0.066541 | 1 | 6  | 26  |
| -CYER | 0.066541 | 1 | 6  | 19  |
| -CYLK | 0.066541 | 1 | 6  | 48  |
| -CDIK | 0.066541 | 3 | 18 | 21  |
| -CKTR | 0.066541 | 3 | 18 | 47  |
| -CLER | 0.066541 | 3 | 18 | 39  |
| -CLSR | 0.066541 | 5 | 30 | 95  |
| -CSTR | 0.066541 | 6 | 36 | 96  |
| -CSVr | 0.066541 | 6 | 36 | 68  |
| -CTVR | 0.068164 | 7 | 41 | 82  |
| -CYVR | 0.069434 | 4 | 23 | 58  |
| -CGLR | 0.070455 | 3 | 17 | 72  |
| -CKDR | 0.070455 | 3 | 17 | 26  |
| -CTDR | 0.070455 | 3 | 17 | 34  |
| -CTRR | 0.070455 | 3 | 17 | 92  |
| -CDAR | 0.07259  | 2 | 11 | 37  |

|       |          |    |    |    |
|-------|----------|----|----|----|
| -CELR | 0.07259  | 6  | 33 | 63 |
| -CGFK | 0.07259  | 2  | 11 | 12 |
| -CLCR | 0.07259  | 2  | 11 | 43 |
| -CPHR | 0.07259  | 2  | 11 | 42 |
| -CPYR | 0.07259  | 2  | 11 | 34 |
| -CQFR | 0.07259  | 2  | 11 | 23 |
| -CTAK | 0.07259  | 2  | 11 | 18 |
| -CMVR | 0.074859 | 3  | 16 | 31 |
| -CQVR | 0.074859 | 3  | 16 | 32 |
| -CSYK | 0.074859 | 3  | 16 | 34 |
| -CSIR | 0.075533 | 7  | 37 | 73 |
| -CRRR | 0.076047 | 4  | 21 | 94 |
| -CSQK | 0.076047 | 4  | 21 | 39 |
| -CAEK | 0.079849 | 1  | 5  | 1  |
| -CAQR | 0.079849 | 1  | 5  | 22 |
| -CARR | 0.079849 | 2  | 10 | 65 |
| -CASK | 0.079849 | 2  | 10 | 49 |
| -CAVR | 0.079849 | 4  | 20 | 53 |
| -CAWR | 0.079849 | 1  | 5  | 24 |
| -CAYK | 0.079849 | 1  | 5  | 19 |
| -CCAK | 0.079849 | 2  | 10 | 12 |
| -CCEK | 0.079849 | 1  | 5  | 19 |
| -CCER | 0.079849 | 2  | 10 | 28 |
| -CCQK | 0.079849 | 1  | 5  | 22 |
| -CCSR | 0.079849 | 2  | 10 | 28 |
| -CCYR | 0.079849 | 1  | 5  | 13 |
| -CDAK | 0.079849 | 1  | 5  | 11 |
| -CDDK | 0.079849 | 1  | 5  | 9  |
| -CDER | 0.079849 | 3  | 15 | 20 |
| -CDHK | 0.079849 | 1  | 5  | 9  |
| -CFKK | 0.079849 | 1  | 5  | 2  |
| -CFSK | 0.079849 | 2  | 10 | 22 |
| -CFVK | 0.079849 | 1  | 5  | 6  |
| -CGMR | 0.079849 | 2  | 10 | 42 |
| -CGNR | 0.079849 | 1  | 5  | 17 |
| -CHDK | 0.079849 | 1  | 5  | 14 |
| -CIER | 0.079849 | 1  | 5  | 26 |
| -CKHR | 0.079849 | 1  | 5  | 6  |
| -CKYR | 0.079849 | 1  | 5  | 10 |
| -CLEK | 0.079849 | 1  | 5  | 15 |
| -CMAK | 0.079849 | 1  | 5  | 16 |
| -CMRK | 0.079849 | 1  | 5  | 20 |
| -CMVK | 0.079849 | 1  | 5  | 10 |
| -CNDK | 0.079849 | 2  | 10 | 13 |
| -CNGR | 0.079849 | 10 | 50 | 72 |
| -CNRK | 0.079849 | 1  | 5  | 19 |
| -CNTK | 0.079849 | 2  | 10 | 7  |
| -CPAK | 0.079849 | 1  | 5  | 28 |
| -CPDK | 0.079849 | 1  | 5  | 9  |
| -CPDR | 0.079849 | 2  | 10 | 26 |
| -CPFR | 0.079849 | 2  | 10 | 38 |
| -CPSK | 0.079849 | 3  | 15 | 39 |
| -CQNR | 0.079849 | 1  | 5  | 34 |
| -CRMK | 0.079849 | 1  | 5  | 20 |
| -CSDR | 0.079849 | 3  | 15 | 47 |
| -CSEK | 0.079849 | 1  | 5  | 16 |
| -CSFR | 0.079849 | 2  | 10 | 22 |

|       |          |   |    |     |
|-------|----------|---|----|-----|
| -CTEK | 0.079849 | 1 | 5  | 10  |
| -CWNR | 0.079849 | 1 | 5  | 21  |
| -CWSK | 0.079849 | 1 | 5  | 19  |
| -CYCK | 0.079849 | 1 | 5  | 13  |
| -CYDR | 0.079849 | 5 | 25 | 25  |
| -CYNR | 0.079849 | 1 | 5  | 29  |
| -CYQK | 0.079849 | 1 | 5  | 13  |
| -CGVR | 0.085553 | 3 | 14 | 22  |
| -CLQK | 0.085553 | 3 | 14 | 20  |
| -CNPR | 0.085553 | 3 | 14 | 27  |
| -CRTK | 0.085553 | 3 | 14 | 47  |
| -CTLK | 0.085553 | 3 | 14 | 47  |
| -CAFR | 0.088721 | 2 | 9  | 41  |
| -CDLK | 0.088721 | 2 | 9  | 22  |
| -CFLK | 0.088721 | 2 | 9  | 24  |
| -CHSR | 0.088721 | 2 | 9  | 36  |
| -CMDR | 0.088721 | 2 | 9  | 15  |
| -CNAR | 0.088721 | 2 | 9  | 36  |
| -CPPR | 0.088721 | 2 | 9  | 51  |
| -CSLR | 0.08983  | 9 | 40 | 127 |
| -CFSR | 0.090152 | 7 | 31 | 69  |
| -CEAK | 0.092134 | 3 | 13 | 22  |
| -CLYR | 0.092134 | 3 | 13 | 60  |
| -CNVR | 0.092134 | 6 | 26 | 62  |
| -CSGR | 0.092134 | 6 | 26 | 77  |
| -CTFR | 0.092134 | 3 | 13 | 47  |
| -CTHR | 0.092134 | 3 | 13 | 38  |
| -CSER | 0.093157 | 7 | 30 | 50  |
| -CMTR | 0.09394  | 4 | 17 | 42  |
| -CLLR | 0.094558 | 9 | 38 | 135 |
| -CGYR | 0.095058 | 5 | 21 | 42  |
| -CTLR | 0.097114 | 9 | 37 | 98  |
| -CACK | 0.099811 | 1 | 4  | 15  |
| -CADR | 0.099811 | 1 | 4  | 31  |
| -CAIK | 0.099811 | 1 | 4  | 20  |
| -CAMR | 0.099811 | 3 | 12 | 39  |
| -CANK | 0.099811 | 1 | 4  | 24  |
| -CAQK | 0.099811 | 2 | 8  | 18  |
| -CAWK | 0.099811 | 1 | 4  | 7   |
| -CCAR | 0.099811 | 3 | 12 | 31  |
| -CCDK | 0.099811 | 1 | 4  | 10  |
| -CCKR | 0.099811 | 1 | 4  | 16  |
| -CCYK | 0.099811 | 1 | 4  | 6   |
| -CDFK | 0.099811 | 1 | 4  | 6   |
| -CDIR | 0.099811 | 3 | 12 | 39  |
| -CDKR | 0.099811 | 1 | 4  | 19  |
| -CDNR | 0.099811 | 1 | 4  | 27  |
| -CDPK | 0.099811 | 2 | 8  | 9   |
| -CDQK | 0.099811 | 1 | 4  | 5   |
| -CDSR | 0.099811 | 3 | 12 | 43  |
| -CDTR | 0.099811 | 2 | 8  | 42  |
| -CDVR | 0.099811 | 6 | 24 | 61  |
| -CECR | 0.099811 | 1 | 4  | 13  |
| -CENK | 0.099811 | 1 | 4  | 7   |
| -CEVK | 0.099811 | 1 | 4  | 4   |
| -CFDK | 0.099811 | 1 | 4  | 4   |
| -CFKR | 0.099811 | 1 | 4  | 15  |

|       |          |   |    |     |
|-------|----------|---|----|-----|
| -CFPK | 0.099811 | 1 | 4  | 10  |
| -CFTR | 0.099811 | 1 | 4  | 26  |
| -CGKK | 0.099811 | 1 | 4  | 11  |
| -CGQK | 0.099811 | 1 | 4  | 10  |
| -CHCK | 0.099811 | 1 | 4  | 8   |
| -CHCR | 0.099811 | 1 | 4  | 26  |
| -CHIK | 0.099811 | 1 | 4  | 11  |
| -CHKR | 0.099811 | 1 | 4  | 18  |
| -CHNR | 0.099811 | 1 | 4  | 18  |
| -CHRK | 0.099811 | 1 | 4  | 23  |
| -CHRR | 0.099811 | 2 | 8  | 35  |
| -CHSK | 0.099811 | 2 | 8  | 13  |
| -CILR | 0.099811 | 4 | 16 | 59  |
| -CIQK | 0.099811 | 1 | 4  | 6   |
| -CITK | 0.099811 | 3 | 12 | 24  |
| -CKFR | 0.099811 | 1 | 4  | 29  |
| -CKPK | 0.099811 | 1 | 4  | 11  |
| -CLCK | 0.099811 | 1 | 4  | 16  |
| -CLDR | 0.099811 | 4 | 16 | 50  |
| -CMER | 0.099811 | 2 | 8  | 12  |
| -CMHK | 0.099811 | 1 | 4  | 8   |
| -CMKK | 0.099811 | 1 | 4  | 6   |
| -CMMK | 0.099811 | 1 | 4  | 11  |
| -CMMR | 0.099811 | 2 | 8  | 20  |
| -CMRR | 0.099811 | 1 | 4  | 31  |
| -CMTK | 0.099811 | 2 | 8  | 26  |
| -CNIR | 0.099811 | 2 | 8  | 30  |
| -CNPK | 0.099811 | 1 | 4  | 6   |
| -CNVK | 0.099811 | 2 | 8  | 15  |
| -CPCK | 0.099811 | 1 | 4  | 20  |
| -CPNR | 0.099811 | 2 | 8  | 30  |
| -CQER | 0.099811 | 2 | 8  | 20  |
| -CQIR | 0.099811 | 1 | 4  | 17  |
| -CREK | 0.099811 | 1 | 4  | 8   |
| -CRPK | 0.099811 | 1 | 4  | 24  |
| -CRRK | 0.099811 | 3 | 12 | 50  |
| -CSGK | 0.099811 | 2 | 8  | 21  |
| -CTTR | 0.099811 | 6 | 24 | 56  |
| -CVFK | 0.099811 | 1 | 4  | 27  |
| -CVWK | 0.099811 | 1 | 4  | 20  |
| -CVWR | 0.099811 | 1 | 4  | 35  |
| -CWAR | 0.099811 | 1 | 4  | 11  |
| -CWLK | 0.099811 | 1 | 4  | 12  |
| -CWPR | 0.099811 | 1 | 4  | 22  |
| -CWWK | 0.099811 | 1 | 4  | 14  |
| -CYAK | 0.099811 | 2 | 8  | 25  |
| -CYGK | 0.099811 | 1 | 4  | 5   |
| -CYHK | 0.099811 | 1 | 4  | 11  |
| -CYKR | 0.099811 | 1 | 4  | 22  |
| -CYNK | 0.099811 | 1 | 4  | 16  |
| -CYTK | 0.099811 | 2 | 8  | 12  |
| -CQSR | 0.099811 | 5 | 20 | 50  |
| -CTSR | 0.10303  | 8 | 31 | 107 |
| -CNLR | 0.10647  | 4 | 15 | 72  |
| -CSDK | 0.10647  | 4 | 15 | 28  |
| -CYPR | 0.10647  | 4 | 15 | 29  |
| -CATK | 0.10889  | 3 | 11 | 38  |



|        |         |   |    |    |
|--------|---------|---|----|----|
| -CMSK  | 0.10889 | 3 | 11 | 36 |
| -CVTK  | 0.10889 | 3 | 11 | 27 |
| -CAPR  | 0.11407 | 2 | 7  | 40 |
| -CCVR  | 0.11407 | 4 | 14 | 50 |
| -CDHR  | 0.11407 | 4 | 14 | 38 |
| -CHTR  | 0.11407 | 2 | 7  | 21 |
| -CIFR  | 0.11407 | 2 | 7  | 23 |
| -CIRR  | 0.11407 | 4 | 14 | 65 |
| -CMHR  | 0.11407 | 2 | 7  | 30 |
| -CPIK  | 0.11407 | 2 | 7  | 18 |
| -CQ GK | 0.11407 | 2 | 7  | 17 |
| -CRGK  | 0.11407 | 2 | 7  | 32 |
| -CRGR  | 0.11407 | 2 | 7  | 38 |
| -CTGR  | 0.11407 | 2 | 7  | 40 |
| -CWCK  | 0.11407 | 2 | 7  | 9  |
| -CWDK  | 0.11407 | 2 | 7  | 8  |
| -CYQR  | 0.11407 | 2 | 7  | 24 |
| -CDPR  | 0.11743 | 5 | 17 | 21 |
| -CFVR  | 0.11977 | 3 | 10 | 26 |
| -CNMR  | 0.11977 | 3 | 10 | 31 |
| -CYRK  | 0.11977 | 3 | 10 | 38 |
| -CLGR  | 0.12284 | 8 | 26 | 61 |
| -CRYR  | 0.12284 | 4 | 13 | 56 |
| -CKSK  | 0.12608 | 6 | 19 | 23 |
| -CRVR  | 0.12703 | 7 | 22 | 80 |
| -CAFK  | 0.13308 | 1 | 3  | 15 |
| -CAHK  | 0.13308 | 1 | 3  | 7  |
| -CAPK  | 0.13308 | 1 | 3  | 14 |
| -CCGK  | 0.13308 | 2 | 6  | 30 |
| -CCMK  | 0.13308 | 1 | 3  | 12 |
| -CCTK  | 0.13308 | 1 | 3  | 27 |
| -CCTR  | 0.13308 | 1 | 3  | 26 |
| -CCWR  | 0.13308 | 1 | 3  | 13 |
| -CDMK  | 0.13308 | 1 | 3  | 12 |
| -CDNK  | 0.13308 | 2 | 6  | 17 |
| -CDYK  | 0.13308 | 2 | 6  | 11 |
| -CEHK  | 0.13308 | 1 | 3  | 11 |
| -CFFK  | 0.13308 | 1 | 3  | 12 |
| -CFMK  | 0.13308 | 1 | 3  | 10 |
| -CFWR  | 0.13308 | 1 | 3  | 15 |
| -CGEK  | 0.13308 | 1 | 3  | 19 |
| -CGGK  | 0.13308 | 2 | 6  | 14 |
| -CGIR  | 0.13308 | 2 | 6  | 33 |
| -CGPK  | 0.13308 | 1 | 3  | 11 |
| -CGRK  | 0.13308 | 2 | 6  | 21 |
| -CGWK  | 0.13308 | 1 | 3  | 13 |
| -CHIR  | 0.13308 | 1 | 3  | 21 |
| -CHYK  | 0.13308 | 1 | 3  | 12 |
| -CIAK  | 0.13308 | 2 | 6  | 18 |
| -CIDK  | 0.13308 | 1 | 3  | 5  |
| -CIDR  | 0.13308 | 4 | 12 | 16 |
| -CIHK  | 0.13308 | 1 | 3  | 8  |
| -CIKR  | 0.13308 | 1 | 3  | 21 |
| -CKAK  | 0.13308 | 2 | 6  | 16 |
| -CKHK  | 0.13308 | 1 | 3  | 11 |
| -CKIK  | 0.13308 | 1 | 3  | 18 |
| -CKVK  | 0.13308 | 1 | 3  | 11 |

|       |         |    |    |     |
|-------|---------|----|----|-----|
| -CLHR | 0.13308 | 2  | 6  | 47  |
| -CLMK | 0.13308 | 1  | 3  | 19  |
| -CLWK | 0.13308 | 1  | 3  | 15  |
| -CMFR | 0.13308 | 1  | 3  | 11  |
| -CMQR | 0.13308 | 1  | 3  | 10  |
| -CNCK | 0.13308 | 1  | 3  | 13  |
| -CNHR | 0.13308 | 2  | 6  | 40  |
| -CNYK | 0.13308 | 2  | 6  | 20  |
| -CPMK | 0.13308 | 1  | 3  | 6   |
| -CQDK | 0.13308 | 1  | 3  | 10  |
| -CRDK | 0.13308 | 1  | 3  | 16  |
| -CRWK | 0.13308 | 1  | 3  | 22  |
| -CTQK | 0.13308 | 1  | 3  | 10  |
| -CVFR | 0.13308 | 2  | 6  | 16  |
| -CVHK | 0.13308 | 2  | 6  | 26  |
| -CVHR | 0.13308 | 1  | 3  | 50  |
| -CVIK | 0.13308 | 1  | 3  | 23  |
| -CWAK | 0.13308 | 1  | 3  | 7   |
| -CWDR | 0.13308 | 2  | 6  | 10  |
| -CWER | 0.13308 | 1  | 3  | 12  |
| -CWLK | 0.13308 | 1  | 3  | 46  |
| -CWQR | 0.13308 | 1  | 3  | 16  |
| -CWRK | 0.13308 | 1  | 3  | 15  |
| -CWVK | 0.13308 | 1  | 3  | 11  |
| -CWWK | 0.13308 | 1  | 3  | 14  |
| -CYEK | 0.13308 | 1  | 3  | 6   |
| -CYMK | 0.13308 | 1  | 3  | 16  |
| -CGCR | 0.13308 | 3  | 9  | 34  |
| -CKTK | 0.13308 | 3  | 9  | 15  |
| -CLFR | 0.13308 | 3  | 9  | 43  |
| -CTWR | 0.13308 | 3  | 9  | 45  |
| -CYFR | 0.13308 | 3  | 9  | 25  |
| -CHDR | 0.13974 | 7  | 20 | 26  |
| -CRAR | 0.14091 | 6  | 17 | 91  |
| -CLVR | 0.14259 | 10 | 28 | 66  |
| -CFER | 0.14518 | 4  | 11 | 15  |
| -CLPK | 0.14518 | 4  | 11 | 33  |
| -CALR | 0.14787 | 10 | 27 | 106 |
| -CCIR | 0.14972 | 3  | 8  | 27  |
| -CNNR | 0.14972 | 3  | 8  | 23  |
| -CRCR | 0.14972 | 3  | 8  | 39  |
| -CSPK | 0.14972 | 6  | 16 | 29  |
| -CEAR | 0.15356 | 5  | 13 | 36  |
| -CADK | 0.1597  | 2  | 5  | 23  |
| -CCFR | 0.1597  | 2  | 5  | 22  |
| -CDKK | 0.1597  | 2  | 5  | 15  |
| -CEFR | 0.1597  | 4  | 10 | 27  |
| -CEGK | 0.1597  | 2  | 5  | 18  |
| -CFGK | 0.1597  | 2  | 5  | 8   |
| -CGDR | 0.1597  | 2  | 5  | 41  |
| -CGQR | 0.1597  | 2  | 5  | 25  |
| -CIWR | 0.1597  | 2  | 5  | 21  |
| -CLQR | 0.1597  | 2  | 5  | 25  |
| -CNKK | 0.1597  | 2  | 5  | 21  |
| -CNRR | 0.1597  | 2  | 5  | 45  |
| -CPGR | 0.1597  | 2  | 5  | 19  |
| -CPNK | 0.1597  | 2  | 5  | 16  |

|       |         |    |    |    |
|-------|---------|----|----|----|
| -CVIR | 0.1597  | 8  | 20 | 46 |
| -CVMK | 0.1597  | 2  | 5  | 14 |
| -CWCR | 0.1597  | 2  | 5  | 14 |
| -CYMR | 0.1597  | 2  | 5  | 25 |
| -CLIR | 0.1644  | 7  | 17 | 47 |
| -CTIR | 0.16635 | 5  | 12 | 43 |
| -CFEK | 0.17111 | 3  | 7  | 3  |
| -CHGR | 0.17111 | 3  | 7  | 19 |
| -CLMR | 0.17111 | 3  | 7  | 57 |
| -CNER | 0.17111 | 3  | 7  | 19 |
| -CRFR | 0.17744 | 4  | 9  | 50 |
| -CQRR | 0.18148 | 5  | 11 | 41 |
| -CVGR | 0.18427 | 6  | 13 | 62 |
| -CALK | 0.18912 | 9  | 19 | 61 |
| -CVVR | 0.19012 | 10 | 21 | 33 |
| -CSMR | 0.19962 | 9  | 18 | 83 |
| -CAER | 0.19962 | 2  | 4  | 30 |
| -CAGK | 0.19962 | 2  | 4  | 13 |
| -CAHR | 0.19962 | 2  | 4  | 31 |
| -CAMK | 0.19962 | 1  | 2  | 14 |
| -CCHK | 0.19962 | 2  | 4  | 15 |
| -CCRR | 0.19962 | 2  | 4  | 40 |
| -CDCK | 0.19962 | 1  | 2  | 2  |
| -CDEK | 0.19962 | 2  | 4  | 6  |
| -CECK | 0.19962 | 1  | 2  | 8  |
| -CEEK | 0.19962 | 1  | 2  | 4  |
| -CEIK | 0.19962 | 2  | 4  | 7  |
| -CEIR | 0.19962 | 3  | 6  | 19 |
| -CEQK | 0.19962 | 1  | 2  | 3  |
| -CEWK | 0.19962 | 1  | 2  | 5  |
| -CEWR | 0.19962 | 1  | 2  | 28 |
| -CFHR | 0.19962 | 1  | 2  | 12 |
| -CFIR | 0.19962 | 1  | 2  | 18 |
| -CFQK | 0.19962 | 2  | 4  | 14 |
| -CFQR | 0.19962 | 2  | 4  | 28 |
| -CFYK | 0.19962 | 1  | 2  | 7  |
| -CGCK | 0.19962 | 1  | 2  | 17 |
| -CGHR | 0.19962 | 2  | 4  | 26 |
| -CGIK | 0.19962 | 1  | 2  | 14 |
| -CGLK | 0.19962 | 1  | 2  | 23 |
| -CGNK | 0.19962 | 1  | 2  | 9  |
| -CGYK | 0.19962 | 1  | 2  | 14 |
| -CHAK | 0.19962 | 1  | 2  | 8  |
| -CHAR | 0.19962 | 2  | 4  | 24 |
| -CHFR | 0.19962 | 1  | 2  | 13 |
| -CHKK | 0.19962 | 2  | 4  | 15 |
| -CHPK | 0.19962 | 1  | 2  | 17 |
| -CHQK | 0.19962 | 1  | 2  | 8  |
| -CHQR | 0.19962 | 3  | 6  | 28 |
| -CHYR | 0.19962 | 1  | 2  | 20 |
| -CIFK | 0.19962 | 1  | 2  | 8  |
| -CIGK | 0.19962 | 1  | 2  | 9  |
| -CINK | 0.19962 | 2  | 4  | 15 |
| -CINR | 0.19962 | 1  | 2  | 25 |
| -CKEK | 0.19962 | 1  | 2  | 4  |
| -CKGK | 0.19962 | 1  | 2  | 7  |
| -CMEK | 0.19962 | 1  | 2  | 7  |

|       |         |    |    |    |
|-------|---------|----|----|----|
| -CMGR | 0.19962 | 1  | 2  | 18 |
| -CMQK | 0.19962 | 1  | 2  | 7  |
| -CMWK | 0.19962 | 1  | 2  | 11 |
| -CNQK | 0.19962 | 1  | 2  | 8  |
| -CNWR | 0.19962 | 2  | 4  | 28 |
| -CNYR | 0.19962 | 2  | 4  | 28 |
| -CPCR | 0.19962 | 2  | 4  | 56 |
| -CPGK | 0.19962 | 2  | 4  | 8  |
| -CPWK | 0.19962 | 1  | 2  | 18 |
| -CPWR | 0.19962 | 1  | 2  | 35 |
| -CQCR | 0.19962 | 3  | 6  | 13 |
| -CQEK | 0.19962 | 1  | 2  | 11 |
| -CQFK | 0.19962 | 1  | 2  | 11 |
| -CQIK | 0.19962 | 1  | 2  | 11 |
| -CQKK | 0.19962 | 1  | 2  | 4  |
| -CQMR | 0.19962 | 2  | 4  | 16 |
| -CQVK | 0.19962 | 4  | 8  | 12 |
| -CQYK | 0.19962 | 1  | 2  | 2  |
| -CRHR | 0.19962 | 3  | 6  | 50 |
| -CRIK | 0.19962 | 1  | 2  | 11 |
| -CRIR | 0.19962 | 6  | 12 | 58 |
| -CRQK | 0.19962 | 2  | 4  | 12 |
| -CRWR | 0.19962 | 2  | 4  | 34 |
| -CSMK | 0.19962 | 3  | 6  | 27 |
| -CTWK | 0.19962 | 2  | 4  | 15 |
| -CVCR | 0.19962 | 1  | 2  | 28 |
| -CWFR | 0.19962 | 1  | 2  | 11 |
| -CWGR | 0.19962 | 2  | 4  | 8  |
| -CWMK | 0.19962 | 1  | 2  | 17 |
| -CWNK | 0.19962 | 1  | 2  | 11 |
| -CWPK | 0.19962 | 1  | 2  | 6  |
| -CWYK | 0.19962 | 1  | 2  | 10 |
| -CYGR | 0.19962 | 2  | 4  | 33 |
| -CYYK | 0.19962 | 1  | 2  | 13 |
| -CIVR | 0.20913 | 11 | 21 | 46 |
| -CPQR | 0.21293 | 8  | 15 | 25 |
| -CTCR | 0.21498 | 7  | 13 | 50 |
| -CRMR | 0.2218  | 5  | 9  | 79 |
| -CNSK | 0.22358 | 14 | 25 | 34 |
| -CVMR | 0.22458 | 9  | 16 | 38 |
| -CACR | 0.23955 | 6  | 10 | 42 |
| -CGTK | 0.23955 | 3  | 5  | 14 |
| -CMCR | 0.23955 | 3  | 5  | 20 |
| -CQAK | 0.23955 | 3  | 5  | 13 |
| -CYRR | 0.23955 | 3  | 5  | 48 |
| -CLRK | 0.25407 | 7  | 11 | 56 |
| -CCGR | 0.26616 | 2  | 3  | 28 |
| -CCHR | 0.26616 | 2  | 3  | 19 |
| -CFNR | 0.26616 | 2  | 3  | 28 |
| -CGWR | 0.26616 | 2  | 3  | 19 |
| -CICK | 0.26616 | 2  | 3  | 7  |
| -CKER | 0.26616 | 2  | 3  | 5  |
| -CKKK | 0.26616 | 2  | 3  | 7  |
| -CKMR | 0.26616 | 2  | 3  | 33 |
| -CNFK | 0.26616 | 2  | 3  | 16 |
| -CRYK | 0.26616 | 2  | 3  | 17 |
| -CSWK | 0.26616 | 2  | 3  | 26 |

|       |         |    |    |    |
|-------|---------|----|----|----|
| -CTQR | 0.26616 | 4  | 6  | 31 |
| -CVAK | 0.26616 | 8  | 12 | 27 |
| -CVYR | 0.26616 | 2  | 3  | 21 |
| -CWMR | 0.26616 | 2  | 3  | 18 |
| -CWQK | 0.26616 | 2  | 3  | 17 |
| -CWYR | 0.26616 | 2  | 3  | 12 |
| -CYPK | 0.26616 | 2  | 3  | 20 |
| -CDRR | 0.27149 | 17 | 25 | 61 |
| -CYLR | 0.27947 | 7  | 10 | 35 |
| -CCRK | 0.29943 | 3  | 4  | 21 |
| -CHTK | 0.29943 | 3  | 4  | 27 |
| -CMNR | 0.30711 | 10 | 13 | 33 |
| -CICR | 0.3194  | 4  | 5  | 11 |
| -CMIR | 0.3194  | 4  | 5  | 22 |
| -CCLR | 0.3327  | 5  | 6  | 66 |
| -CHHR | 0.3327  | 5  | 6  | 20 |
| -CGRR | 0.34934 | 7  | 8  | 31 |
| -CSCR | 0.36295 | 10 | 11 | 47 |
| -CTMR | 0.36295 | 10 | 11 | 50 |
| -CAAK | 0.39925 | 2  | 2  | 16 |
| -CCCK | 0.39925 | 1  | 1  | 12 |
| -CCFK | 0.39925 | 2  | 2  | 8  |
| -CCIK | 0.39925 | 1  | 1  | 8  |
| -CCNR | 0.39925 | 3  | 3  | 16 |
| -CCQR | 0.39925 | 2  | 2  | 15 |
| -CCWK | 0.39925 | 1  | 1  | 6  |
| -CDTK | 0.39925 | 3  | 3  | 14 |
| -CDVK | 0.39925 | 2  | 2  | 17 |
| -CDWK | 0.39925 | 1  | 1  | 10 |
| -CEKK | 0.39925 | 1  | 1  | 2  |
| -CEMK | 0.39925 | 1  | 1  | 2  |
| -CEPK | 0.39925 | 1  | 1  | 11 |
| -CEYK | 0.39925 | 1  | 1  | 5  |
| -CEYR | 0.39925 | 3  | 3  | 12 |
| -CFAR | 0.39925 | 2  | 2  | 17 |
| -CFCK | 0.39925 | 2  | 2  | 6  |
| -CFHK | 0.39925 | 1  | 1  | 3  |
| -CFIK | 0.39925 | 1  | 1  | 8  |
| -CFMR | 0.39925 | 2  | 2  | 21 |
| -CFNK | 0.39925 | 2  | 2  | 8  |
| -CFWK | 0.39925 | 1  | 1  | 3  |
| -CHEK | 0.39925 | 1  | 1  | 8  |
| -CHHK | 0.39925 | 1  | 1  | 4  |
| -CHMK | 0.39925 | 1  | 1  | 15 |
| -CHNK | 0.39925 | 1  | 1  | 18 |
| -CHWK | 0.39925 | 1  | 1  | 6  |
| -CIIR | 0.39925 | 4  | 4  | 15 |
| -CIKK | 0.39925 | 2  | 2  | 10 |
| -CIQR | 0.39925 | 1  | 1  | 14 |
| -CKDK | 0.39925 | 1  | 1  | 3  |
| -CKNK | 0.39925 | 1  | 1  | 12 |
| -CKQR | 0.39925 | 1  | 1  | 20 |
| -CKWK | 0.39925 | 1  | 1  | 12 |
| -CKWR | 0.39925 | 1  | 1  | 8  |
| -CLHK | 0.39925 | 2  | 2  | 16 |
| -CLWR | 0.39925 | 2  | 2  | 31 |
| -CMCK | 0.39925 | 1  | 1  | 2  |

|       |         |    |    |    |
|-------|---------|----|----|----|
| -CMFK | 0.39925 | 1  | 1  | 10 |
| -CMYR | 0.39925 | 2  | 2  | 11 |
| -CNAK | 0.39925 | 2  | 2  | 16 |
| -CNCR | 0.39925 | 2  | 2  | 10 |
| -CQCK | 0.39925 | 1  | 1  | 4  |
| -CQHK | 0.39925 | 1  | 1  | 6  |
| -CQNK | 0.39925 | 1  | 1  | 22 |
| -CQPK | 0.39925 | 1  | 1  | 4  |
| -CQPR | 0.39925 | 1  | 1  | 21 |
| -CQOK | 0.39925 | 1  | 1  | 6  |
| -CQSK | 0.39925 | 1  | 1  | 8  |
| -CQWK | 0.39925 | 1  | 1  | 7  |
| -CQWR | 0.39925 | 1  | 1  | 8  |
| -CRCK | 0.39925 | 2  | 2  | 15 |
| -CRHK | 0.39925 | 2  | 2  | 32 |
| -CRNK | 0.39925 | 1  | 1  | 19 |
| -CSWR | 0.39925 | 2  | 2  | 44 |
| -CTCK | 0.39925 | 1  | 1  | 12 |
| -CTIK | 0.39925 | 2  | 2  | 18 |
| -CVDK | 0.39925 | 1  | 1  | 2  |
| -CWEK | 0.39925 | 1  | 1  | 6  |
| -CWFK | 0.39925 | 2  | 2  | 5  |
| -CWGK | 0.39925 | 1  | 1  | 6  |
| -CWHK | 0.39925 | 1  | 1  | 8  |
| -CWHR | 0.39925 | 2  | 2  | 16 |
| -CWIK | 0.39925 | 1  | 1  | 7  |
| -CWIR | 0.39925 | 1  | 1  | 13 |
| -CWKK | 0.39925 | 1  | 1  | 4  |
| -CWKR | 0.39925 | 1  | 1  | 16 |
| -CWVR | 0.39925 | 2  | 2  | 23 |
| -CYDK | 0.39925 | 1  | 1  | 15 |
| -CYFK | 0.39925 | 1  | 1  | 14 |
| -CYHR | 0.39925 | 1  | 1  | 26 |
| -CYIR | 0.39925 | 2  | 2  | 29 |
| -CYKK | 0.39925 | 1  | 1  | 13 |
| -CYSK | 0.39925 | 1  | 1  | 18 |
| -CYWK | 0.39925 | 1  | 1  | 7  |
| -CYYR | 0.39925 | 3  | 3  | 21 |
| -CVRR | 0.45628 | 16 | 14 | 83 |
| -CIMR | 0.49906 | 10 | 8  | 19 |
| -CCDR | 0.53233 | 4  | 3  | 13 |
| -CHER | 0.53233 | 4  | 3  | 25 |
| -CMWR | 0.55894 | 7  | 5  | 23 |
| -CKCR | 0.59887 | 3  | 2  | 11 |
| -CQQR | 0.59887 | 6  | 4  | 27 |
| -CVQR | 0.59887 | 6  | 4  | 22 |
| -CHVR | 0.66541 | 10 | 6  | 43 |
| -CHGK | 0.69868 | 7  | 4  | 11 |
| -CGAK | 0.71864 | 9  | 5  | 17 |
| -CCCR | 0.79849 | 4  | 2  | 15 |
| -CCVK | 0.79849 | 2  | 1  | 10 |
| -CDWR | 0.79849 | 2  | 1  | 15 |
| -CFCR | 0.79849 | 2  | 1  | 8  |
| -CGHK | 0.79849 | 2  | 1  | 19 |
| -CHFK | 0.79849 | 2  | 1  | 3  |
| -CHWR | 0.79849 | 2  | 1  | 18 |
| -CMIK | 0.79849 | 2  | 1  | 8  |

|       |         |    |    |    |
|-------|---------|----|----|----|
| -CPHK | 0.79849 | 2  | 1  | 11 |
| -CRFK | 0.79849 | 2  | 1  | 18 |
| -CLIK | 0.8484  | 17 | 8  | 23 |
| -CQTK | 1.5471  | 31 | 8  | 29 |
| -CGVK | 1.6968  | 68 | 16 | 21 |
| -CMYK | 2.3955  | 6  | 1  | 5  |
| -CPYK | 2.462   | 37 | 6  | 23 |
| -CCMR | 2.7947  | 7  | 1  | 15 |
| -CEQR | 2.7947  | 14 | 2  | 9  |
