# Supplementary material for: Towards the Systematic Mapping and Engineering of the Protein Prenylation Machinery in Saccharomyces cerevisiae
Source: PubMed Central journal article supplement (PMC4358939; doi:10.1371/journal.pone.0120716), 2015-03-13
Supplement: pone.0120716.s009.pdf [file pone.0120716.s009.pdf]

## CAAX-Box Processing Requirements during Pheromone Maturation Compared to the RRS

- CAAX-box dependent pheromone diffusion data is derived from Figure 2 in Trueblood *et al.*, 2000, MCB, 20, 4381-4392

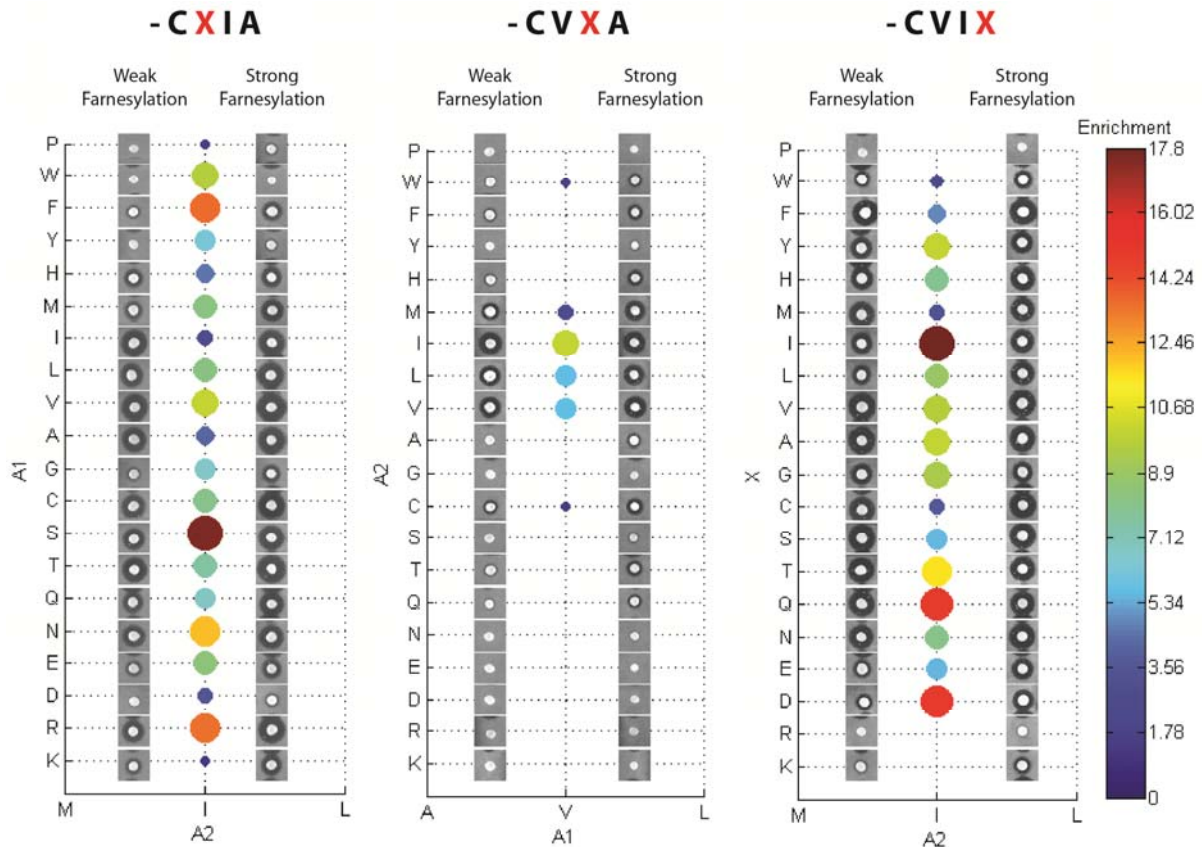

**Figure S2:** Comparing the CaaX-box specificity requirements for membrane recruitment in the RRS and in the pheromone diffusion assay: A positive read-out in the pheromone diffusion assay (as judged by the formation of dark halo around a yeast colony) strictly depends on farnesylation as well as proteolytic processing of **a**-factor. To dissect the substrate specificity requirements for **a**-factor maturation, systematic sequence-structure-function have previously been conducted in strains with weak farnesylation activity (based on the W303 background that features a less active FTase mutant  $\beta$ -FTase<sup>H83Y</sup>) and strong farnesylation activity where wild-type  $\beta$ -FTase was additionally expressed from a high-copy plasmid. See Trueblood *et al.*, 2000, MCB, 20, 4381-3992 for details. A comparison of the two data sets shows that the CaaX-box dependent membrane recruitment in the RRS and **a**-factor maturation impose similar substrate specificity requirements in the  $a_2$  and X positions. Differences are primarily observed for  $a_1$  where the substrate specificity is more relaxed for a positive read-out in the RRS compared to in the pheromone diffusion assay. In particular, bulky hydrophobic residues are enriched in the RRS, but not in the pheromone diffusion assay. The difference could be due to a relaxed requirement for proteolytic processing in the RRS which is strictly necessary for the function of the **a**-factor while bulky, hydrophobic residues confer sufficient membrane affinity to enable a positive read-out in the RRS.

## 1. Enrichment Factors of Sequencing Motives Ending with -CXIA

| Motif | Enrichment | Counts |       |       |
|-------|------------|--------|-------|-------|
|       |            | 37 °C  | 25 °C | Naive |
| -CKIA | 1.254      | 44     | 14    | 10    |
| -CPIA | 1.597      | 28     | 7     | 17    |
| -CIIA | 2.935      | 125    | 17    | 24    |
| -CDIA | 3.513      | 132    | 15    | 23    |
| -CAIA | 4.232      | 212    | 20    | 35    |
| -CHIA | 4.551      | 57     | 5     | 6     |
| -CYIA | 6.247      | 266    | 17    | 22    |
| -CGIA | 6.787      | 34     | 2     | 9     |
| -CQIA | 6.844      | 120    | 7     | 19    |
| -CTIA | 7.563      | 341    | 18    | 40    |
| -CCIA | 8.051      | 121    | 6     | 18    |
| -CLIA | 8.239      | 227    | 11    | 32    |
| -CMIA | 8.284      | 166    | 8     | 16    |
| -CEIA | 8.441      | 148    | 7     | 11    |
| -CWIA | 9.696      | 170    | 7     | 20    |
| -CVIA | 10.12      | 355    | 14    | 40    |
| -CNIA | 12.06      | 544    | 18    | 19    |
| -CRIA | 13.48      | 473    | 14    | 26    |
| -CFIA | 13.57      | 204    | 6     | 20    |
| -CSIA | 17.51      | 351    | 8     | 41    |

## 2. Enrichment Factors of Sequencing Motives Ending with -CVXA

| Motif | Enrichment | Counts |       |       |
|-------|------------|--------|-------|-------|
|       |            | 37 °C  | 25 °C | Naive |
| -CVEA | 0.030      | 1      | 13    | 24    |
| -CVRA | 0.033      | 2      | 24    | 77    |
| -CVTA | 0.033      | 1      | 12    | 38    |
| -CVKA | 0.036      | 1      | 11    | 14    |
| -CVGA | 0.042      | 2      | 19    | 20    |
| -CVSA | 0.057      | 2      | 14    | 19    |
| -CVAA | 0.079      | 1      | 5     | 20    |
| -CVQA | 0.079      | 1      | 5     | 20    |
| -CVPA | 0.099      | 2      | 8     | 25    |
| -CVNA | 0.332      | 5      | 6     | 31    |
| -CVYA | 0.399      | 1      | 1     | 26    |
| -CVDA | 0.548      | 11     | 8     | 13    |
| -CVFA | 0.798      | 2      | 1     | 23    |
| -CVHA | 0.798      | 4      | 2     | 16    |
| -CVCA | 1.397      | 28     | 8     | 27    |
| -CVWA | 1.597      | 4      | 1     | 22    |
| -CVMA | 2.951      | 207    | 28    | 24    |
| -CVLA | 5.737      | 388    | 27    | 29    |
| -CVVA | 5.781      | 362    | 25    | 45    |
| -CVIA | 10.12      | 355    | 14    | 40    |

### 3. Enrichment Factors of Sequencing Motives Ending with -CVIX

| Motif | Enrichment | Counts |       |       |
|-------|------------|--------|-------|-------|
|       |            | 37 °C  | 25 °C | Naive |
| -CVIK | 0.133      | 1      | 3     | 23    |
| -CVIR | 0.159      | 8      | 20    | 46    |
| -CVIP | 0.332      | 5      | 6     | 27    |
| -CVIW | 2.395      | 30     | 5     | 11    |
| -CVIM | 3.371      | 152    | 18    | 19    |
| -CVIC | 3.811      | 105    | 11    | 11    |
| -CVIF | 4.899      | 135    | 11    | 11    |
| -CVIE | 5.605      | 351    | 25    | 41    |
| -CVIS | 5.635      | 494    | 35    | 53    |
| -CVIH | 7.984      | 80     | 4     | 9     |
| -CVIN | 8.144      | 102    | 5     | 15    |
| -CVIL | 8.912      | 692    | 31    | 51    |
| -CVIG | 9.473      | 261    | 11    | 19    |
| -CVIV | 9.781      | 147    | 6     | 23    |
| -CVIA | 10.12      | 355    | 14    | 40    |
| -CVIY | 10.14      | 127    | 5     | 10    |
| -CVIT | 11.57      | 87     | 3     | 21    |
| -CVIQ | 14.93      | 187    | 5     | 17    |
| -CVID | 15.01      | 376    | 10    | 18    |
| -CVII | 17.79      | 312    | 7     | 23    |
